# Supplementary material for: Modular DNA barcoding of nanobodies enables multiplexed in situ protein imaging and high-throughput biomolecule detection
Source: eLife. 2025 Jul 22;14:RP105225. doi: 10.7554/eLife.105225 (PMC12283080; doi:10.7554/eLife.105225)
Supplement: Source data 1. [file elife-105225-data1.xlsx]

## Sheet: Fig1-Fig supp1
Fig.1-Fig. supp. 1b
Input	1	1
After Ni-NTA	0.897696	0.88208
After desalting	0.883742	0.853187
Fig.1-Fig. supp. 1d
Nb-NGV-N3	1	1
Nb-oligo	0.921823	0.936561

## Sheet: Fig1-Fig supp3
Fig.1-Fig. supp. 3c
misHCR	Nb-fluorophore
76.5604	14.2738
83.7024	11.3928
70.8228	13.1704
Fig.1-Fig. supp. 3d
misHCR	Nb-fluorophore
85.8748	28.6422
87.1642	34.4344
81.2048	25.88
Fig.1-Fig. supp. 3f
2nd Ab	misHCR
0.375	0.552351
0.384	0.494443
0.372	0.428517
0.359499	0.487258
0.530104	0.438408
0.436516	0.460032
0.376282	0.378263
0.38725	0.548377
0.331888	0.436074
0.436605	0.581216
0.408338	0.44153
0.462305	0.454243
0.520746	0.487128
0.440296	0.503102
0.495899	0.66871
0.46883	0.451466
0.40164	0.34698
0.44912	0.433961
0.553558	0.488699
0.458865	0.588795
0.472273	0.339391
0.438917	0.350276
0.53822	0.346945
0.501281	0.41013
0.376606	0.550604
0.393937

## Sheet: Fig1-Fig supp4
Fig.1-Fig. supp. 4d (NeuN)						Fig.1-Fig. supp. 4d (NF-H)
Round 1	Round 2	Round 3	Round 4	Round 5		Round 1	Round 2	Round 3	Round 4	Round 5
19.225	17.626	17.314	17.201	16.591		59.686	49.834	51.52	54.802	51.217
18.89	17.259	16.828	16.581	16.35		51.354	46.022	46.968	48.958	47.241
21.257	19.049	18.478	18.175	17.669		54.475	47.859	48.817	51.772	49.226

## Sheet: Fig3
Fig.3c
GFP conc. (µM)	GFP			mCherry			α-Tubulin
1e-05	1.92482	1.97576	2.08432	8.12642	8.07141	7.9996	0.846897	0.836441	0.585924
0.0001	3.10569	3.30098	3.15954	7.71746	7.6391	7.41627	0.533423	0.697841	0.103643
0.000316	4.33195	4.46121	4.6701	6.89636	6.94262	6.83818	-0.00630183	0.221084	-0.146574
0.001	4.93139	5.12137	5.19096	5.5392	5.45073	5.22241	0.157291	0.155827	-0.209598
0.003162	6.68853	6.57389	6.83849	4.15586	4.25113	4.27343	0.481825	0.684273	0.191126
0.01	7.7349	7.74991	7.67728	3.00472	2.934	2.69683	0.477191	0.667683	0.355145
0.031623	8.28594	8.32869	8.4358	1.95117	1.82364	1.84158	0.322769	0.528445	0.124677
0.1	8.42028	8.1921	8.59657	1.55346	1.49604	1.48405	0.678585	0.707554	0.604237
1	8.25071	8.28096	8.40819	1.28658	1.46817	1.35242	0.915499	1.03388	0.688161
Fig.3f
GFP		mCherry
BLISA, qPCR, REL	Western Blot, density ratio	BLISA, qPCR, REL	Western Blot, density ratio
1	0.669573	2.53791	2.50187
0.909878	0.722373	3.69349	3.1837
0.994457	0.7806	3.91545	2.8773
1.07526	0.593845	1.78423	1.67629
1.38063	0.815291	1.51478	1.15261
2.17439	1.48563	1.02193	0.791595
3.27209	2.22544	1.05506	0.761009
3.83226	2.35915	1.28065	0.630775
3.2151	2.33768	1.2353	0.497183
3.42407	2.59748	1.14192	0.245271
3.22665	2.72604	1	0.216158

## Sheet: Fig3-Fig supp1
Fig.3-Fig. supp. 1c
BLISA, qPCR, REL	Western Blot, density ratio
1	0.392264
1.01236	0.312721
1.29113	0.403993
1.17644	0.240023
1.38513	0.279871
1.80457	0.553989
2.15116	0.94313
2.19312	1.10368
3.36204	2.25039
2.85931	1.52518
2.94121	1.62886
Fig.3-Fig. supp. 1f
BLISA, qPCR, REL	Western Blot, density ratio
1	0.348459
0.954246	0.293933
0.997184	0.346488
1.05943	0.450036
1.03462	0.635836
1.17745	1.1561
1.70262	1.83354
1.45013	1.79163
1.57188	1.8769
1.67211	1.96063
1.51186	1.43379

## Sheet: Fig4
Fig.4b
		ELISA						BLISA				Correlation_p-p38α		Correlation_p-ERK1/2		Correlation_p-JNK		Correlation_p-AMPKα1		Correlation_p-CREB		Correlation_p-Src		Correlation_p-Akt
	Treatment	U87			U937			U87		U937		BLISA	ELISA	BLISA	ELISA	BLISA	ELISA	BLISA	ELISA	BLISA	ELISA	BLISA	ELISA	BLISA	ELISA
p-p38α	NT	1.25273	1.43898	1.4312	2.26658	2.31554	1.8615	0.1301	0.131	0.1506	0.1499	1.3743	0.13055	3.61369	1.34195	1.94933	0.3947	1.06964	0.2872	2.03349	0.72635	1.06451	0.43975	2.73252	1.5205
	10%FBS	2.16693	2.41805	1.93198	3.69816	3.6761	3.35364	0.1503	0.1594	0.2757	0.2591	2.17232	0.15485	4.18211	1.6179	2.24257	0.39355	1.16867	0.27635	2.97132	1.20705	1.29046	0.43855	3.00848	1.74475
	Aniso	4.82165	4.80334	4.53816	6.49746	6.49187	6.29292	0.3101	0.6316	1.1963	1.1	4.72105	0.47085	3.27778	0.9955	4.16144	1.48135	0.893747	0.2714	3.89741	1.76245	1.00289	0.33455	3.32595	1.9092
	H2O2	2.67087	2.61778	2.27242	5.08169	4.84569	4.60237	0.1944	0.2084	0.5156	0.5078	2.52036	0.2014	3.11879	0.6196	2.27691	0.49775	1.29939	0.3251	2.03505	0.65925	2.07399	1.06815	2.55046	0.83135
p-ERK1/2	NT	3.55502	3.65663	3.62943	2.4366	2.93372	2.24742	1.2797	1.4042	0.5712	0.5435	2.14787	0.15025	2.53925	0.55735	1.42755	0.3232	1.0563	0.2906	3.57927	1.49105	1.10246	0.4076	3.54087	1.4634
	10%FBS	4.11587	4.22318	4.2073	2.29186	3.01141	2.36534	1.5932	1.6426	0.5304	0.5236	3.57597	0.2674	2.5562	0.527	1.78751	0.35925	1.10378	0.2719	4.709	1.9677	1.06945	0.4033	2.77035	1.2332
	Aniso	3.27799	3.34508	3.21028	1.46327	1.50147	1.24513	1.0519	0.9391	0.1203	0.1187	6.42741	1.14815	1.40329	0.1195	3.95841	1.11945	1.0743	0.27115	4.79824	2.0174	1.06485	0.4067	2.87732	1.31215
	H2O2	3.14795	3.1569	3.05152	1.32155	1.37492	0.881396	0.6122	0.627	0.0928	0.0938	4.84325	0.5117	1.19262	0.0933	1.52408	0.32265	1.24523	0.3255	2.02013	0.44305	1.04515	0.3898	2.34542	0.7753
p-JNK	NT	1.76806	2.03853	2.0414	1.53084	1.54656	1.20526	0.3927	0.3967	0.3109	0.3355
	10%FBS	2.01333	2.37194	2.34246	1.61059	2.10055	1.65141	0.4017	0.3854	0.3553	0.3632
	Aniso	4.0324	4.28665	4.16526	3.92617	4.0238	3.92526	1.5011	1.4616	1.1072	1.1317
	H2O2	2.23174	2.38938	2.20961	1.49566	1.76408	1.31248	0.5022	0.4933	0.3288	0.3165
p-AMPKα1	NT	0.837908	1.3238	1.04721	1.06594	1.15944	0.943525	0.294	0.2804	0.2934	0.2878
	10%FBS	1.16034	1.25868	1.08699	0.979214	1.34536	0.986778	0.2812	0.2715	0.2807	0.2631
	Aniso	0.862043	0.974188	0.845011	1.05362	1.19846	0.970833	0.2733	0.2695	0.2758	0.2665
	H2O2	1.26736	1.35092	1.27989	1.33694	1.42651	0.972246	0.3471	0.3031	0.3419	0.3091
p-CREB	NT	1.96264	1.98781	2.15002	3.6162	3.64089	3.48072	0.764	0.6887	1.5657	1.4164
	10%FBS	3.02857	2.98841	2.89696	4.62474	4.85052	4.65174	1.2903	1.1238	2.0441	1.8913
	Aniso	3.96228	3.94394	3.78603	4.73073	4.90853	4.75548	1.734	1.7909	2.1448	1.89
	H2O2	1.97987	2.07222	2.05305	2.08671	2.23811	1.73557	0.6808	0.6377	0.4245	0.4616
p-Src	NT	1.02917	1.002	1.16234	1.14265	1.14634	1.01839	0.4248	0.4547	0.4137	0.4015
	10%FBS	1.25204	1.32877	1.29056	0.84447	1.32388	1.03999	0.435	0.4421	0.4074	0.3992
	Aniso	0.863006	1.07938	1.06628	1.08404	1.12673	0.983768	0.2229	0.4462	0.3989	0.4145
	H2O2	2.05936	2.07983	2.08279	1.03248	1.26014	0.842819	1.0528	1.0835	0.3945	0.3851
p-Akt	NT	2.54563	2.66474	2.9872	2.68234	4.7622	3.17805	1.5371	1.5039	1.5342	1.3926
	10%FBS	2.87365	3.1201	3.03171	2.12041	3.84995	2.34068	1.837	1.6525	1.3568	1.1096
	Aniso	3.27326	3.36698	3.33762	2.62787	3.40946	2.59463	2.0588	1.7596	1.3706	1.2537
	H2O2	2.83515	2.53513	2.2811	1.94638	3.32504	1.76483	0.9165	0.7462	0.8631	0.6875
Fig.4c
	p-p38α		p-ERK1/2		p-JNK		p-AMPKα1		p-CREB		p-Src		p-Akt
Flubendazole	-1.17391	1.62717	-0.736687	1.1349	-1.09448	1.45608	-1.16782	2.14247	-1.37113	0.978356	-1.15328	1.32953	-0.832121	1.59024
Disulfiram	-0.801592	-0.337367	-0.558797	-0.128393	-0.450182	0.141625	-0.7006	-0.0771675	-0.83384	-0.0915236	-0.785937	-0.154543	-0.411032	0.356449
Risperidone	-1.46316	0.0259724	-1.17782	0.0765408	-1.39001	-0.0657016	-1.64493	0.0216656	-1.64553	0.423949	-1.6461	0.115853	-1.26361	0.993653
Chlorpromazine hydrochloride	-0.132094	0.609421	-0.0624808	-0.28112	0.0974201	0.0928502	0.239559	0.326131	0.532953	0.343939	-0.03533	0.1675	1.03296	0.712454
Phenformin hydrochloride	-0.51885	-1.10527	-0.296934	-0.983287	-0.473329	-0.973538	-0.323814	-1.09761	-0.294551	-0.863455	-0.630515	-1.14363	0.326867	-0.21766
Paroxetine HCl	-0.710525	0.919111	-0.624847	1.48367	-0.488746	1.2839	-0.721823	1.61413	0.0142356	1.55479	-0.87798	1.14261	-0.849446	0.902658
Clomipramine hydrochloride	0.0718156	0.0209544	-0.0341539	0.420038	-0.0285274	0.557354	-0.00715035	0.722583	-0.0124804	0.684205	-0.198298	0.242771	0.166113	0.709679
Haloperidol	1.25473	-0.642875	1.03626	-0.902065	1.31999	-0.474672	1.53372	-0.805719	0.93949	-0.892587	1.14405	-0.957384	1.26487	-0.883091
Fluphenazine hydrochloride	0.200641	0.228674	-0.159012	0.460283	0.355086	0.37816	-0.0617948	-0.165918	0.114334	0.0383282	0.0252764	-0.087324	-0.321566	0.461754
Carbamazepine	0.514978	0.0829048	0.23353	0.230001	0.772093	0.36964	0.50108	0.274972	1.05422	0.793347	0.284953	0.109827	2.85657	0.847537
Clozapine	0.0316408	0.174467	0.315302	-0.208515	0.682246	0.148165	0.561637	0.0412704	0.999618	0.370931	0.321722	-0.114334	0.828814	0.249112
Levetiracetam	1.71527	-0.948941	0.657837	-0.610179	1.22228	-0.499228	1.52016	-0.597161	1.4161	-0.335488	1.01292	-0.825319	0.518339	-0.595556
Citalopram HBr	-1.2704	-0.172269	-1.11497	-0.162954	-1.14862	0.21138	-1.33492	0.00218526	-1.39363	0.058417	-1.36643	2.21644	-1.11668	-0.113272
Doxepin hydrochloride	0.358832	-0.112177	0.491818	-0.0181112	0.85269	-0.149513	0.589271	0.252691	0.612824	0.101494	0.436136	-0.15257	0.31708	0.757787
Topotecan hydrochloride	-0.151577	0.754788	-0.0656893	1.68737	-0.206503	1.18542	0.189893	1.22391	-0.470793	1.07493	-0.218536	1.32307	-0.0886721	1.28051
Nisoldipine	-0.820889	0.723379	-0.696856	-0.194123	-0.685308	-0.0177842	-0.407026	0.428761	-0.643101	-0.11748	-0.55359	0.392647	-0.0726142	-0.0387506
Quetiapine	0.858988	-0.185588	0.194982	-0.107584	1.01126	0.0505535	1.00651	0.342437	1.23682	0.0700146	0.664136	-0.126706	0.385244	0.37834
Epirubicin hydrochloride	0.369363	-1.30931	0.185769	-1.18653	0.210933	-1.21884	0.609187	-1.35496	0.68814	-1.17197	0.0986546	-1.37019	3.7673	-0.988614
Thioridazine hydrochloride	-0.734902	-0.569588	-0.72532	-0.696397	-0.781486	-0.496662	-0.955649	-0.656971	-0.81596	-0.721315	-0.720184	-0.446403	-0.860806	-0.759805
Vincristine sulfate	-1.01668	-0.221674	-0.860537	-0.588499	-1.01566	-0.633048	-1.1914	-0.572702	-1.31321	-1.05827	-1.32409	-0.751434	-1.21028	-0.49958
Clofazimine	1.18807	0.820238	0.51767	-0.201411	0.803691	-0.0819159	0.878488	0.0683436	0.97235	-0.0391963	0.811666	-0.103242	1.07016	-0.213836
Aripiprazole	-0.292731	1.32554	-0.492746	0.446303	-0.565353	1.13812	-0.15596	1.91076	-0.0273916	1.23723	0.10724	1.55422	-0.359428	1.19801
Itraconazole	-1.44312	0.916571	-1.36863	1.02416	-1.48453	1.05096	-1.67169	1.13254	-1.60515	1.24476	-1.65821	0.893976	-1.5111	0.442899
Sodium 2-propylpentanoate	-0.116297	0.901734	-0.129494	0.47165	-0.267924	0.582881	0.236571	0.442079	0.210636	0.949362	-0.0532746	0.810253	-0.607791	-0.148228
Amoxapine	0.137421	-0.964459	-0.0171945	-0.494305	0.864644	-0.549446	0.656674	-0.602514	0.590112	-0.47459	0.43123	-0.883526	0.126679	-0.804658
Olanzapine	0.255003	0.0912061	0.101109	0.516891	0.679775	0.346096	0.47382	0.598731	0.320261	0.513968	0.284287	0.0114646	0.312994	1.19227
Sertraline hydrochloride	0.37847	-1.35744	0.483888	-0.938276	0.571632	-1.13056	0.659288	-1.17634	0.554077	-1.10673	0.0534598	-1.29974	0.122571	-1.1084
Trifluoperazine hydrochloride	-0.314073	0.585942	-0.473999	0.339275	-0.518783	1.03839	-0.399059	1.3345	-0.272046	1.08204	-0.406621	0.777296	0.810003	0.170374
Perphenazine	-0.719384	0.716595	-0.131556	0.486226	-0.103702	1.00022	-0.245022	1.26156	0.0133381	1.0342	-0.311458	0.785589	-0.532897	1.09839
Fluvoxamine maleate	0.397613	-0.473936	0.0893292	0.233255	0.533004	-0.0403732	0.0621199	-0.238985	0.802804	0.134561	0.191791	-0.0962296	0.181166	-0.0161603
Amitriptyline hydrochloride	-0.35781	0.354929	-0.187018	0.094142	-0.350988	0.969758	-0.478039	0.501703	-0.40535	0.991334	-0.266797	0.606863	1.47253	0.325709
Docetaxel	0.193858	0.131846	0.221154	-0.0122442	0.693436	0.0444241	0.535436	-0.0764206	0.708919	0.0305965	0.396007	-0.168541	0.102144	-0.384837
Vandetanib	0.18884	-0.793352	0.10473	-1.09054	0.465816	-0.94592	0.172156	-1.17373	0.101149	-0.966798	0.0483404	-1.10683	0.0546256	-1.1022
Pitavastatin calcium	-1.25402	0.16217	-0.691172	-0.42225	-1.50856	-0.445584	-1.32067	-0.235935	-1.21918	-0.418328	-0.66859	0.0738308	-1.41425	-0.712724
Asenapine maleate	0.488773	-0.719291	0.553789	-0.715603	0.18766	-1.25892	0.120748	-1.18082	0.908494	-0.759836	0.483624	-0.504689	-0.348417	-1.35681
Vinorelbine ditartrate	-0.859825	-1.03555	-0.535191	-1.09572	-1.00774	-1.37726	-0.879221	-1.48846	-0.902114	-1.44879	-0.320204	-1.20829	-0.982366	-1.4967
Doxorubicin hydrochloride	0.299762	-0.854126	0.3478	-0.720599	0.799041	-0.668577	0.718725	-0.687405	0.13394	-0.965487	0.255943	-0.865314	0.136772	-0.778638
OSI-420	-0.464551	-0.375187	-0.451723	-0.409141	-0.386376	-0.07566	-0.617948	-0.171768	-0.972459	-0.561503	-0.685762	-0.158729	-0.418788	0.964508
Lurasidone hydrochloride	-0.472852	-0.798277	-0.177301	-0.89056	-0.1949	-0.726365	-0.354311	-0.808146	-0.471829	-1.13952	-0.512848	-0.979888	-0.464733	-1.0026
Irinotecan hydrochloride	-0.578447	-0.748562	-0.514885	-0.259348	-0.225996	-0.397052	-0.44524	-0.547122	-0.378565	-0.534166	-0.308898	-0.422192	-0.271164	-0.265156
Escitalopram oxalate	-0.858276	0.0562042	-0.681638	0.0706279	-0.487137	0.428905	-0.449845	0.826333	-0.432134	0.689037	-0.697734	0.382009	-0.366507	0.532714
Homoharringtonine	1.95839	0.876861	3.33573	0.437227	2.11534	1.00617	1.58463	0.675968	1.54125	0.471306	1.43861	0.648191	1.17783	0.673456
Fluoxetine hydrochloride	0.168644	0.185185	-0.145445	-0.00128927	0.574511	0.124416	0.29551	0.188151	0.619244	0.277253	0.712131	-0.161449	0.616063	0.233163
PD184352 (CI-1040)	0.855209	-0.270553	-0.141594	-0.213053	0.612893	-0.367518	0.869464	-0.573324	0.704846	-0.709925	0.514927	-0.479545	0.27581	-0.526802
Ridaforolimus (MK-8669)	-0.6224	-0.966163	-0.663349	-0.769185	-0.430526	-0.972038	-0.60743	-1.00843	-0.455537	-1.00656	-0.55743	-0.87262	-0.601914	-0.849664
Nilotinib (AMN-107)	0.287992	1.27715	0.232201	1.17258	-0.445132	0.599106	-0.0276265	1.04031	-0.0748866	1.14942	0.53991	1.54622	-0.565166	0.585738
Sunitinib Malate	-0.0316415	0.692558	4.32025	0.681168	-0.724563	0.0915695	-0.682177	0.641986	-0.473416	0.78023	-0.220962	1.06918	-0.762973	0.177649
Masitinib (AB1010)	-0.644145	0.904026	-0.464649	-0.0331455	-0.679199	-0.00444349	-0.666494	0.141099	0.131869	0.682341	0.190164	0.62734	-0.579564	-0.370177
ZSTK474	-1.16722	0.929488	-1.07345	0.726408	-1.02121	1.3871	-0.968034	1.7317	-1.0067	1.20976	-1.15467	1.18488	-0.809858	0.487403
MLN8054	-0.0557402	-1.33731	-0.181655	-0.786374	0.0970948	-1.10992	-0.0354684	-1.30661	-0.193003	-1.21877	-0.430804	-1.38299	-0.3371	-0.99211
LY294002	-0.200518	-0.044713	-0.278782	-0.383014	-0.0566701	-0.287143	-0.0242656	-0.270539	-0.101672	-0.00357505	-0.282768	-0.339508	-0.507336	-0.428619
OSU-03012 (AR-12)	-0.102389	-1.11162	0.249848	-0.581027	0.385049	-0.860394	0.70024	-0.805781	0.728869	-1.04584	0.396007	-0.851503	-0.196337	-0.751197
BX-912	-1.03957	0.327826	-0.802142	0.105784	-0.835962	0.606681	-0.807897	0.755569	-1.16444	0.0620067	-0.79151	0.781243	-0.678555	0.337616
Pelitinib (EKB-569)	-1.83062	0.256056	-1.44353	0.223034	-1.78901	0.32605	-1.93595	0.388368	-1.98677	0.279393	-1.91634	0.48989	-1.69027	0.164934
Aurora A Inhibitor I	0.246856	-0.378316	0.248427	-0.721195	0.77444	-0.369524	0.753018	-0.462728	0.421602	-0.651799	0.727995	-0.548897	0.673631	-0.563506
HMN-214	0.867166	0.070174	0.444698	0.0362049	0.719585	0.265762	0.567426	0.65935	0.426089	-0.117411	0.45624	-0.102442	0.177256	-0.308698
CP-673451	0.431438	-1.07046	0.134753	-0.91687	0.233522	-1.16941	0.360611	-1.21207	-0.262312	-1.50056	0.267302	-1.00242	0.115689	-0.993748
BS-181 HCl	-1.68426	2.27006	-1.36561	1.16703	-1.64471	1.69186	-1.85268	1.35859	-1.82861	2.35847	-1.75223	2.12925	-1.62894	1.02219
Tie2 kinase inhibitor	0.95371	-0.0558331	0.506394	-0.38746	0.262117	-0.447464	0.890251	-0.698048	2.10671	0.63312	2.20137	0.105081	0.891013	-0.775033
BMS-265246	-0.135842	0.409228	-0.668941	0.289451	-0.978186	-0.488103	-0.927829	-0.134862	-0.799599	-0.233732	-0.246639	0.22856	-1.00369	-0.585528
GSK461364	0.44897	1.18178	0.587983	1.33484	0.931644	1.43892	1.5097	1.64027	0.912843	0.973869	1.03377	1.01964	0.61532	1.46912
Chrysophanic Acid	-0.425305	-0.4315	-0.532441	-0.10983	-0.452855	0.100957	-0.570648	-0.226288	-0.661532	-0.182579	-0.671923	-0.327003	0.138302	-0.224804
Phenformin HCl	-0.132156	-1.73819	-0.139853	-1.38266	0.0158915	-1.65564	-0.201207	-1.83786	-0.0730917	-1.91946	-0.250052	-1.89885	-0.313352	-1.61557
Trametinib (GSK1120212)	-1.17921	-1.27018	-0.694197	-0.994975	-0.704726	-1.20288	-0.591871	-1.27879	-0.454087	-1.12019	-0.765539	-1.21522	-0.818925	-0.726641
CHIR-124	0.451943	-1.12002	1.10997	-0.439072	0.440464	-0.994803	0.192009	-1.29484	0.704846	-1.27793	0.234159	-1.22618	2.88388	-0.81237
KX2-391	-0.479636	-0.698723	-0.39209	-0.837986	-0.411475	-0.865039	-0.40018	-1.11796	-0.539274	-1.21207	-0.518181	-1.10377	0.29213	-0.38641
ZM 336372	-0.632436	-1.27737	-0.343641	-0.839132	-0.550352	-1.16592	-0.685974	-1.41148	-0.37891	-1.25991	-0.590786	-1.432	-0.451013	-0.963118
BGT226 (NVP-BGT226)	-1.49999	-0.392874	-1.35419	-0.527124	-1.78372	-1.14073	-1.44266	0.0420172	-1.72637	-0.8638	-1.58971	-0.333909	-1.53557	-0.757358
CEP-33779	-1.5441	1.18667	-1.14656	0.274783	-1.47217	0.196627	-1.35316	0.457888	-1.74853	0.283259	-1.5959	0.582092	-1.38167	0.318915
GDC-0068	0.911398	0.84062	-0.0635808	-0.0183404	0.00696334	-0.126299	0.480604	1.06383	-0.086139	0.50741	0.591931	1.59763	0.168932	0.429266
TAE226 (NVP-TAE226)	2.62854	-0.0529214	2.2325	0.0486723	1.37405	-0.270454	2.84177	-0.0650934	1.18918	0.0901723	4.19266	0.367557	1.26157	-0.505064
Semaxanib (SU5416)	1.65542	0.752805	0.88844	-0.0619766	-0.0655751	0.0794372	0.741192	0.36976	1.89975	0.908563	2.34709	1.45847	-0.276342	-0.0832321
JNK-IN-8	-1.21183	-0.654274	-1.04164	-0.236659	-1.09568	-0.328843	-1.21082	-0.449472	-1.0758	-0.493229	-1.22682	-0.196431	-0.757927	-0.529642
10058-F4	-0.389901	-0.892907	-0.245551	-0.276903	-0.0975906	-0.612341	-0.30284	-0.564424	-0.5867	-0.923238	-0.261251	-0.651419	-0.480573	-0.702084
LY2835219	-0.605983	-0.0358851	-0.0819612	0.378602	-0.596165	0.146177	-0.651432	0.050357	-0.794353	-0.425852	-0.682909	-0.156889	-0.549043	0.757809
SSR128129E	-1.22787	-0.575566	-0.956335	-0.213741	-1.12912	-0.131814	-1.30754	-0.337942	-1.23147	-0.216129	-1.33654	-0.174087	-0.242828	0.399051
CNX-774	-0.08972	-1.00504	-0.342174	-1.02124	0.0306574	-1.0034	0.535249	-0.852832	-0.403555	-1.28276	0.0059986	-1.20421	-0.114518	-1.04103
PFK15	4.06254	3.76359	5.20425	5.4426	1.73566	2.84048	4.35351	4.30864	2.80491	3.16761	3.12271	3.55727	3.26487	4.6672
TAK-632	0.948445	-0.609917	0.103172	-0.757176	0.871008	-0.825164	1.87846	-0.745846	1.01122	-0.901907	1.23767	-0.673176	0.413383	-0.777349
AZD9291	0.934877	-0.8317	0.993588	-0.688926	1.11347	-0.528646	0.715426	-0.678319	0.987469	-0.793179	0.653311	-0.716825	0.273581	-0.858949
KN-62	-0.842913	-0.304626	-0.866542	-0.241655	-0.863717	-0.134463	-0.93094	-0.269979	-0.983159	-0.0724704	-1.09763	-0.441443	-0.818947	-0.420732
GNE-7915	0.556392	-0.251751	0.0485807	-0.10245	0.28043	-0.859431	0.249579	-0.420033	1.06506	-0.125488	0.541964	0.42923	0.132446	-1.06565
IM-12	-0.43212	0.088914	-0.288087	-0.349783	-0.577266	-0.899742	0.119752	-0.869014	0.131454	-0.344531	-0.257171	-0.281488	-0.715695	-1.10788
SMI-4a	1.22335	-0.0478725	0.296555	-0.283779	0.0662773	-0.794861	0.274287	-0.560566	0.164452	-0.454501	0.841556	0.285673	-0.316454	-0.676719
NSC 23766	0.379151	-0.0599528	0.310856	0.307006	1.01427	0.792351	1.13522	0.541037	0.598396	0.411109	0.707011	0.416245	0.4545	2.03104
Pacritinib (SB1518)	0.696926	-0.617166	0.275516	-0.636764	0.627734	-0.552126	0.556161	-0.593863	0.261168	-0.98599	0.503408	-0.776338	0.863595	-0.228715
LY2228820	-0.191442	-1.05878	-0.175926	-0.954777	-0.255461	-0.951355	-0.380886	-1.05423	-0.456158	-1.19702	-0.455655	-1.08097	-0.330174	-1.0398
Idarubicin hydrochloride	0.440792	0.928558	0.26997	1.36083	0.538883	1.58566	0.686237	1.26399	0.163348	0.757725	0.200216	1.10667	0.182936	1.41009
Imipramine hydrochloride	1.25024	0.183574	0.492001	0.229268	0.917612	0.323602	1.74589	0.0351089	0.948672	0.529225	0.685467	-0.0749254	2.69726	-0.287375
NU7441	-0.735522	-0.847776	-0.521532	-0.506177	-0.666398	-0.824	-0.666743	-0.65554	-0.875674	-0.210123	-0.862595	-0.778418	-0.66455	0.0155841
DMSO	-1.20529	-0.627635	-1.03843	-0.562464	-1.11858	-0.326161	-1.3175	-0.678381	-1.39688	-0.207293	-1.39053	-0.496903	-1.16374	-0.503425
Pervanadate	2.81015	3.20877	3.42016	2.40581	4.90781	4.01694	1.53852	0.974521	3.11542	3.68888	1.90071	2.6638	1.58338	2.27971

## Sheet: Fig4-Fig supp1
Fig.4-Fig. supp. 1a						Fig.4-Fig. supp. 1c
p-JNK (ng/mL)	ELISA		BLISA			Well	p-p38α			p-Erk1/2			p-JNK			p-AMPKα1			p-CREB			p-Src			p-Akt
20	1.6561	1.6227	6.66856	6.57937		1	7.10139	7.32329	7.4306	2.20585	2.43949	2.67937	7.05135	7.42249	7.58456	3.74167	4.02795	4.08723	4.99586	5.0898	5.46957	6.46711	6.58306	6.84316	3.817	4.28461	3.96885
10	0.9435	1.0028	5.56868	5.60414		2	5.57841	5.76416	5.81427	4.69351	4.94482	5.06179	5.8915	6.19779	6.41554	2.79486	3.12359	3.18927	4.17363	4.272	4.54008	5.45761	5.67224	5.79538	2.72568	3.00771	3.34455
5	0.5691	0.5763	4.68514	4.55535		3	5.29068	5.25331	5.54238	4.41549	4.51684	4.72145	9.90558	10.3062	10.3876	2.21901	2.57985	2.55919	3.32766	3.31246	3.63618	4.69505	4.83242	4.96946	3.26178	3.14864	3.41953
2.5	0.3435	0.3505	3.62489	3.65519		4	4.83889	4.7201	4.86477	3.78336	3.86028	3.98707	8.98042	9.32275	9.51058	7.41607	7.55298	7.71594	2.56847	2.67991	2.87242	3.74276	3.91049	4.15974	2.56102	2.30365	2.87713
1.25	0.2408	0.2321	3.0887	2.91408		5	4.30253	4.22364	4.38883	3.0469	3.03137	3.32158	8.11548	8.49235	8.49817	6.75171	6.89935	6.78691	7.8494	8.02103	8.07987	3.04611	3.30323	3.16514	2.11551	2.13128	2.10705
0.625	0.1902	0.2044	2.35856	2.25786		6	4.14232	4.08536	4.06759	2.49959	2.53431	2.64602	7.21059	7.61084	7.67019	5.83785	5.9321	5.95203	6.87663	7.03532	7.22561	8.23868	8.42733	8.4741	1.8374	1.60331	1.63988
0.3125	0.1819	0.173	1.80722	1.70398		7	3.16424	3.07894	3.0805	1.87401	1.94111	1.97973	6.38643	6.59807	6.64219	4.79527	5.04946	5.00664	6.05295	6.17155	6.13568	7.35204	7.6526	7.69198	4.24035	4.78484	4.71788
0.15625	0.157	0.1771	1.46397	1.56899
0.078125	0.1425	0.1475	0.945483	2.19777
0.039063	0.1535	0.1498	1.19236	0.965108
0.019531	0.146	0.1534	1.01214	1.07643
p-p38α (ng/mL)	ELISA		BLISA
8	3.0196	2.7347	9.97074	10.1549
4	1.9331	1.7454	9.35124	9.43774
2	1.2397	1.1779	8.50333	8.53967
1	0.8124	0.7165	7.7089	7.7422
0.5	0.545	0.5074	6.82765	6.85463
0.25	0.4722	0.4594	5.72759	5.83817
0.125	0.4366	0.4078	4.73614	4.8799
0.0625	0.385	0.3736	4.03362	4.02826
0.03125	0.3346	0.3106	2.87828	2.26985
0.015625	0.3163	0.3388	2.16216	2.04026
0.007813	0.32	0.3505	1.27406	1.48608
p-Akt (ng/mL)	ELISA		BLISA
10			3.34975	3.66531
5	3.5489	3.7046	2.96561	3.11372
2.5	2.0464	2.1889	2.3985	2.58456
1.25	1.0961	1.1541	2.00733	2.22204
0.625	0.6179	0.6356	1.8628	2.12313
0.3125	0.343	0.3577	1.58096	1.9602
0.15625	0.2362	0.2226	1.57716	1.95654
0.039063	0.1147	0.1111	1.20552	1.6512
0.019531	0.0916	0.1029	1.11503	1.35829
0.009766	0.0898	0.0957	0.639944	1.26037
p-AMPKα1 (ng/mL)	ELISA		BLISA
4			12.1201	12.1984
2			10.5982	10.3514
1			10.1496	9.16436
0.5	3.4553	3.4688	9.08578	8.14357
0.25	2.1501	2.1551	7.84453	6.77906
0.125	1.2727	1.249	7.04226	6.15446
0.0625	0.8654	0.8327	6.08035	5.20505
0.03125	0.5789	0.5754	5.28834	4.99813
0.015625	0.4803	0.461	4.34347	3.2334
0.007813	0.3784	0.3814	3.06683	2.35981
0.003906	0.3581	0.4085	1.96357	1.90909
p-CREB (ng/mL)	ELISA		BLISA
2			8.53315	8.79266
1			6.87681	7.1981
0.5	3.1645	3.1137	6.36278	6.37336
0.25	1.8195	1.7752	3.82536	5.11789
0.125	1.0097	0.9682	4.46216	4.22433
0.0625	0.5785	0.5849	3.44388	3.41377
0.03125	0.3673	0.3464	3.80204	3.22129
0.015625	0.2588	0.2643	2.80743	2.79814
0.007813	0.1933	0.1898	2.34286	1.76894
0.003906	0.1592	0.1578	1.49061	1.37877
0.001953	0.1504	0.1454	1.79841	1.85047
p-Src (pg/mL)	ELISA		BLISA
500			11.0329	11.8436
250			10.4761	10.6596
125			9.21792	9.51112
62.5	3.394	3.1735	8.44698	6.18887
31.25	2.4303	2.2912	6.78801	7.60741
15.625	1.9174	1.8192	6.4895	6.73141
7.8125	1.6652	1.5361	6.0235	5.99205
3.90625	1.4475	1.4071	5.56072	5.58715
1.95312	1.2042	1.192	5.29413	2.15506
0.976563	1.1345	1.1353	2.1313	1.66798
0.488281	1.1763	1.1644	1.31383	1.63783
p-Erk1/2 (ng/mL)	ELISA		BLISA
30	2.9528	2.9045	7.06615	6.90469
15	2.2195	2.2003	6.34257	6.44805
7.5	1.4738	1.4594	5.34299	5.25211
3.75	0.9882	0.9488	4.42743	4.31747
1.875	0.7624	0.7494	3.83992	3.37125
0.9375	0.5889	0.533	3.33222	3.26302
0.46875	0.4323	0.4017	2.94097	2.77962
0.234375	0.299	0.2626	2.66993	2.32245
0.117188	0.3143	0.3294	2.16299	1.51541
0.058594	0.312	0.3189	1.69549	1.05814
0.029297	0.305	0.274	1.60673	-0.11335

## Sheet: Fig4-Fig supp2
Fig.4-Fig. supp. 2b
Well	GFP			mCherry			α-tubulin
1	13145	14521	14100	662009	552107	560636	25758	22317	22815
2	18243	16172	16335	386019	505361	497858	19869	24077	25754
3	21585	24182	25947	433774	277827	343842	27122	16354	19922
4	62799	38639	54929	133282	166607	129140	23704	28739	16780
5	73526	84769	68139	53413	59813	71661	25003	26304	33905
6	220560	228522	300645	27025	22554	21334	25756	26878	19921
7	413431	405279	247586	13501	11192	13612	21529	17319	20224
8	469492	350531	411384	13323	12461	10738	27648	24212	24007
9	550609	494423	452398	13404	23409	13856	20506	36368	23364
NC	515547	872362	545380	10322	10100	10579	38440	39947	39978
Fig.4-Fig. supp. 2c
GFP				mCherry
GFP conc. (μM)	UMI counts			mCherry conc. (μM)	UMI counts
1e-05	13145	14521	14100	1	662009	552107	560636
0.0001	18243	16172	16335	0.1	386019	505361	497858
0.000316	21585	24182	25947	0.031623	433774	277827	343842
0.001	62799	38639	54929	0.01	133282	166607	129140
0.003162	73526	84769	68139	0.003162	53413	59813	71661
0.01	220560	228522	300645	0.001	27025	22554	21334
0.031623	413431	405279	247586	0.000316	13501	11192	13612
0.1	469492	350531	411384	0.0001	13323	12461	10738
1	550609	494423	452398	1e-05	13404	23409	13856
0	515547	872362	545380	0	10322	10100	10579

## Sheet: Fig5
Fig.5b			Fig.5c				Fig.5d				Fig.5e			Fig.5f
Duplicate 2	Duplicate 1		Neg.	0.267768	0.00415803		Neg.	0.5152	0.5081		BLISA (sequencing), normalized UMI counts	ELISA, absorbance (450nm)		Negative	Test
0.470504	0.407211		1	1.18115	0.0522564		1	1.6908	1.6898		0.267768	0.51165		0.26881	0.191705
2.36122	2.79682		2	3.32385	0.215764		2	2.8082	2.9763		1.18115	1.6903		0.255857	0.193143
1.08632	0.981229		3	2.16087	0.0839978		3	2.2623	2.3913		3.32385	2.89225		0.282183	0.19955
1.51267	1.66403		4	1.75546	0.253468		4	1.8337	2.171		2.16087	2.3268		0.292014	0.201415
0.539754	0.580506		5	1.00845	0.05276		5	1.436	1.3523		1.75546	2.00235		0.271683	0.207933
0.81337	0.955323		6	1.03602	0.0333475		6	1.3483	1.3707		1.00845	1.39415		0.291878	0.20969
0.684437	0.735147		7	2.01473	0.0721769		7	2.3652	2.2195		1.03602	1.3595		0.256489	0.21531
0.771028	0.851324		8	0.725153	0.0452165		8	0.9404	0.9379		2.01473	2.29235		0.28462	0.234962
2.47923	2.54894		9	2.71034	0.0504474		9	2.3485	2.4895		0.725153	0.93915		0.24236	0.239835
0.749704	0.704827		10	0.568801	0.0413956		10	0.731	0.8292		2.71034	2.419		0.237131	0.251962
0.439377	0.409888		11	2.22322	0.150768		11	2.0467	2.3941		0.568801	0.7801		0.258483	0.260149
1.08411	0.978931		12	2.13386	0.195186		12	1.9274	2.4315		2.22322	2.2204		0.262623	0.265169
1.81497	1.70288										2.13386	2.17945		0.283293	0.265654
0.667368	0.537483													0.25703	0.269339
0.80296	0.792886													0.283127	0.283382
0.543882	0.533521													0.310309	0.284696
0.836884	0.676689													0.286464	0.287757
1.70602	1.60557													0.277883	0.291065
0.771899	0.752198													0.259587	0.296683
0.833773	0.775792													0.22875	0.301572
0.931555	0.938754													0.274772	0.314109
1.12441	1.03323													0.275466	0.321245
2.05166	2.13524													0.235646	0.32223
1.02344	0.909316													0.249967	0.323527
0.503685	0.518092														0.330997
0.270858	0.233065														0.336413
1.77451	1.94493														0.337989
0.591161	0.62247														0.338879
0.734671	0.773975														0.344342
0.350267	0.370803														0.351341
1.38209	1.3815														0.355064
1.56573	1.71529														0.355971
2.08487	1.9908														0.360535
1.49876	1.73578														0.361568
2.24413	2.11838														0.370711
0.835452	0.810554														0.373883
0.628951	0.661985														0.390863
1.91841	1.88156														0.392611
0.810022	1.02113														0.399141
0.861403	0.866874														0.39974
0.694164	0.679278														0.405534
1.23187	1.28382														0.406617
0.574502	0.532759														0.413118
0.417161	0.461501														0.418735
1.65993	2.06374														0.424633
0.39727	0.402209														0.424944
2.20921	2.17552														0.429345
1.21974	1.36149														0.433729
0.756642	0.727114														0.438857
1.38948	1.50787														0.439331
0.709878	0.737326														0.443306
0.876817	0.906215														0.460712
1.39179	1.43313														0.465473
1.25794	1.2347														0.465972
0.280217	0.250122														0.47448
1.08949	1.10361														0.481531
1.74704	1.82257														0.487433
0.783039	0.793169														0.488318
0.546872	0.649644														0.497915
2.7925	2.71047														0.49944
0.283096	0.283669														0.500938
0.864533	0.898723														0.505632
0.947929	0.96788														0.506641
0.487568	0.525713														0.510888
0.877202	1.06852														0.512488
1.48206	1.61215														0.513395
0.748782	0.868471														0.518215
2.04421	2.00361														0.521279
0.562709	0.626016														0.52366
1.75701	1.70045														0.524226
1.42559	1.36164														0.52579
0.548996	0.645495														0.525949
1.69802	1.90469														0.527699
0.568059	0.572277														0.528416
0.736555	0.739569														0.529105
0.783286	0.833879														0.530112
1.53692	1.50666														0.537466
0.683793	0.731125														0.538701
0.53207	0.605215														0.54215
0.715628	0.821657														0.553631
0.94264	0.987252														0.559845
1.04852	1.10188														0.56013
1.1425	1.18746														0.564182
1.05683	1.18353														0.566741
0.924399	0.983039														0.568642
2.70447	2.81243														0.568801
1.46668	1.44647														0.570168
1.50502	1.55618														0.570317
2.47816	2.683														0.571755
1.10293	1.1396														0.572868
1.3838	1.45865														0.573291
0.87074	0.936568														0.574077
0.284158	0.318986														0.574312
0.614257	0.641564														0.579588
1.60369	1.61329														0.584383
0.745167	0.84116														0.585295
1.68156	1.6988														0.58581
0.565125	0.711992														0.58636
0.548247	0.536053														0.589633
0.859201	0.863118														0.590019
0.71007	0.680709														0.594363
0.669875	0.694157														0.597245
0.86357	0.773708														0.598258
1.82429	1.77561														0.602425
0.492239	0.484398														0.604362
0.832106	0.877093														0.606277
1.25424	1.07643														0.606816
2.01933	2.01434														0.608869
1.79557	1.79215														0.611245
0.418199	0.431689														0.615105
1.63262	1.67178														0.615397
0.893643	0.917195														0.617674
0.703744	0.782927														0.617891
0.541236	0.630385														0.623808
0.2895	0.303865														0.624468
1.30936	1.47293														0.62791
0.97773	1.10571														0.628151
0.874392	0.978728														0.629973
0.509765	0.526666														0.63421
0.585237	0.695459														0.638558
0.742895	0.733968														0.640122
0.707317	0.793167														0.640348
1.57608	1.68734														0.64177
2.15654	2.22298														0.642446
0.501947	0.540611														0.645468
0.839032	0.832268														0.650156
1.13213	1.33105														0.653594
0.587577	0.680842														0.660184
0.354215	0.357727														0.662301
0.897024	0.96744														0.663964
2.00647	2.22163														0.675521
0.990273	0.935138														0.682016
0.632112	0.651429														0.682831
2.42904	2.60153														0.685327
1.91952	1.8706														0.686721
0.893666	1.03401														0.695389
0.979214	1.18407														0.69852
0.988099	1.18952														0.700079
3.75927	4.1466														0.70094
1.85152	2.05968														0.704868
2.28937	2.73376														0.707459
1.76284	1.97976														0.709792
1.16275	1.23857														0.710721
1.67683	2.11006														0.711102
0.848857	0.883643														0.717728
0.850804	0.980034														0.720435
1.25287	1.35924														0.722075
0.839957	0.991113														0.723602
1.08186	1.1405														0.724584
1.59357	1.82963														0.725153
2.17517	2.33322														0.727121
0.599236	0.623253														0.727265
2.66482	3.15935														0.730777
0.810383	0.932182														0.736156
0.815727	0.914467														0.738062
1.12163	1.11175														0.738432
0.392399	0.405884														0.741878
0.873906	0.867262														0.741981
1.60805	1.60277														0.743336
3.57554	3.56233														0.743751
3.23076	3.07484														0.750187
1.8458	2.04371														0.750242
1.93446	1.98489														0.754323
0.577399	0.602639														0.756786
0.975255	0.933304														0.762049
1.026	1.03826														0.763378
1.43463	1.5204														0.768643
1.67504	1.9005														0.772399
0.964473	1.40104														0.773722
0.805196	0.839722														0.786453
1.92003	2.01735														0.788104
1.34	1.43963														0.788775
0.864731	0.981214														0.793163
0.677962	0.757495														0.796626
2.14376	2.30816														0.797923
1.32622	1.42602														0.801
1.59879	1.57883														0.803708
0.190813	0.212017														0.804782
1.84832	2.18359														0.807148
1.56717	1.79447														0.808583
1.05853	1.39217														0.808626
2.54151	2.65786														0.811176
1.02776	1.18046														0.818639
1.27748	1.47208														0.822104
0.675745	0.726134														0.822459
1.18291	1.31248														0.823003
1.23852	1.32037														0.833327
0.491005	0.560893														0.83565
0.388631	0.437605														0.836089
1.68512	1.79799														0.840417
0.353978	0.387445														0.84505
1.46329	1.51353														0.850497
1.07002	0.988612														0.8546
1.85486	1.92923														0.86116
0.801758	0.899236														0.864138
1.93504	2.23668														0.865007
1.12614	1.2194														0.865097
0.299956	0.328261														0.86625
1.48378	1.57339														0.868425
0.564002	0.579508														0.870203
0.850741	0.906132														0.870584
1.08414	1.10927														0.871282
0.425138	0.44232														0.871799
2.16767	2.32442														0.877567
0.232266	0.247403														0.878437
1.06537	1.20877														0.878801
0.263813	0.267495														0.881628
0.228054	0.24187														0.884346
0.968365	0.998746														0.884827
1.65812	1.62732														0.885381
1.30771	1.35939														0.891516
1.21157	1.25576														0.896239
1.01131	1.11418														0.89645
0.503767	0.498109														0.898221
2.76978	2.84684														0.899863
0.494953	0.530023														0.903654
3.11306	3.45881														0.904877
0.913736	0.903281														0.905419
1.05531	1.10045														0.906398
0.808235	0.932171														0.908509
0.928812	0.966958														0.908696
1.82857	2.09259														0.910178
1.25991	1.43575														0.915419
0.751248	0.793549														0.915535
1.14237	1.25022														0.915577
0.416194	0.442495														0.916831
1.41716	1.39982														0.917152
0.654445	0.794724														0.919488
2.03587	2.12653														0.922972
1.19496	1.11426														0.923139
0.896005	0.950273														0.92656
0.656722	0.590895														0.929936
1.53006	1.77197														0.932232
0.518925	0.614557														0.935154
1.28364	1.46322														0.936022
0.511171	0.54041														0.937031
0.49832	0.550132														0.940625
0.779208	0.901626														0.947885
1.3867	1.44724														0.953313
1.0916	1.16413														0.953719
0.470225	0.492838														0.954279
0.579832	0.588934														0.957905
0.9892	1.03466														0.960872
1.38373	1.41288														0.962706
0.665367	0.700295														0.96384
0.761364	0.852932														0.964946
0.589687	0.569489														0.966377
0.522154	0.525166														0.968296
0.582114	0.635624														0.972858
0.530634	0.589056														0.983556
1.79114	2.11296														0.987732
2.23102	2.09053														0.994571
0.875962	0.944394														0.995864
1.37679	1.41611														1.00109
0.842881	0.829297														1.00218
0.446416	0.549414														1.00387
1.18684	1.12917														1.00531
1.62588	1.5652														1.00845
0.816298	0.927301														1.00865
0.704407	0.783094														1.01193
1.05705	1.19865														1.01252
0.761311	0.816239														1.02535
0.870899	1.00114														1.02545
0.957358	1.03437														1.02932
3.33248	3.14236														1.03152
0.922084	0.895309														1.03213
1.75783	1.57501														1.03377
0.808946	0.961816														1.03601
1.27081	1.45644														1.04172
0.545792	0.666763														1.05012
0.672623	0.749581														1.05273
0.336436	0.373693														1.05354
2.66969	2.63206														1.05622
1.14399	1.18011														1.05764
0.610762	0.71384														1.05815
0.51134	0.629294														1.06275
1.84543	1.98581														1.06483
1.41775	1.33605														1.06542
1.02705	1.07319														1.07497
1.79194	1.94056														1.0752
1.12206	1.18262														1.07578
0.64883	0.877927														1.07788
1.82195	1.88812														1.07882
0.331028	0.313433														1.07958
0.327873	0.374809														1.08164
1.66783	1.79454														1.08881
0.326218	0.346607														1.09251
1.19218	1.75089														1.09555
1.20445	1.16922														1.09655
0.935415	0.945835														1.0967
2.09195	2.04408														1.09716
0.451502	0.43511														1.09931
1.10003	1.00706														1.10411
2.57399	2.61836														1.10661
1.10797	0.881169														1.10932
0.439601	0.481824														1.11118
0.633653	0.601695														1.11669
0.194346	0.204753														1.11851
0.914548	1.0072														1.12018
1.99936	2.08209														1.12127
1.09151	1.42381														1.12643
1.03393	1.11601														1.12785
0.8481	0.921554														1.12787
1.63018	1.6727														1.13707
0.842889	0.704556														1.14076
2.1182	1.81399														1.14569
2.24454	2.40331														1.1483
0.745472	0.708771														1.15234
1.54745	2.34454														1.15428
0.838912	0.918691														1.15461
0.642624	0.588169														1.158
1.52551	1.54028														1.16205
2.41441	2.80902														1.16267
2.39447	2.65293														1.16498
1.92517	1.93441														1.16533
1.17895	1.2152														1.17277
0.497375	0.51389														1.17546
0.655758	0.741283														1.17677
0.972354	1.14292														1.17785
0.775286	0.891369														1.1793
0.371689	0.410036														1.18115
1.12695	1.22396														1.18276
1.07259	1.14605														1.18683
0.616589	0.683723														1.19629
0.670839	0.738896														1.19707
1.73355	2.00067														1.20043
2.32679	2.78591														1.20066
0.80492	0.839289														1.21432
0.724052	0.776322														1.22535
1.51848	1.56966														1.23159
0.632621	0.687747														1.23366
0.651522	0.719132														1.23591
2.87995	3.0716														1.24632
3.14912	3.09059														1.2477
0.703511	0.71793														1.24795
2.2088	2.42445														1.25766
1.01541	1.13614														1.25785
0.327746	0.319309														1.27945
0.371558	0.351578														1.29061
0.931968	1.07239														1.30605
1.09173	1.19965														1.31429
0.548437	0.630829														1.32895
1.90385	2.08812														1.33355
1.049	1.14962														1.34783
1.37343	1.61759														1.36176
1.90234	2.37543														1.36362
0.900392	0.854743														1.37343
0.740682	0.861319														1.37478
1.30064	1.35726														1.37612
0.505102	0.623262														1.3769
1.04295	1.17028														1.3818
0.423079	0.507866														1.38982
0.871533	1.00253														1.39115
2.356	2.53968														1.39361
1.95699	2.10673														1.39645
1.20487	1.51866														1.3983
0.568981	0.715912														1.40849
0.81802	0.974881														1.40992
1.33531	1.71284														1.4116
1.389	1.45965														1.41246
1.69938	1.8556														1.41697
0.744649	0.828257														1.42123
0.266348	0.309167														1.42432
1.53201	1.62005														1.44867
1.09228	1.02402														1.45424
0.187741	0.198545														1.45657
1.86006	1.96318														1.46859
1.30655	1.32203														1.47154
0.607476	0.720452														1.47751
1.57872	1.65792														1.48841
1.73201	1.72272														1.49551
1.93305	2.00388														1.50523
0.763963	0.676907														1.52179
0.6069	0.62331														1.52408
2.14797	2.06959														1.52858
3.06735	3.04043														1.5306
3.03087	3.04235														1.53289
0.23183	0.18755														1.54407
0.295292	0.286838														1.5471
0.205899	0.209966														1.54857
0.970696	0.93593														1.57204
1.92467	1.94328														1.57603
0.521251	0.536958														1.58835
0.331586	0.344391														1.58881
3.18934	3.29599														1.59554
0.764997	0.718964														1.59846
0.648105	0.702936														1.60541
2.35301	2.40983														1.60849
1.10701	1.24652														1.60951
0.751421	0.84183														1.61727
2.45868	2.61644														1.61832
1.72251	1.68928														1.63171
2.16463	2.40141														1.64051
0.523678	0.622057														1.64272
1.70159	2.1123														1.64881
0.896601	1.41196														1.65101
0.589303	0.717884														1.65144
0.638733	0.822821														1.6522
0.883627	1.05297														1.65579
1.74004	1.88889														1.66314
2.47145	2.64682														1.66642
1.14609	1.20961														1.68082
1.66004	1.85742														1.69018
1.84618	1.81629														1.70589
2.04601	2.15212														1.7116
0.912233	1.08994														1.72736
3.47999	3.20309														1.72873
1.16955	1.2313														1.73119
0.367199	0.380566														1.73523
1.09236	1.03847														1.74155
1.04472	0.815148														1.75546
0.467835	0.531045														1.75873
0.31764	0.344353														1.75892
1.07671	1.21989														1.77749
1.96116	2.07897														1.78481
0.533001	0.541931														1.78777
2.44946	2.63394														1.79386
2.06948	2.28077														1.79995
2.19126	2.244														1.80136
0.598427	0.65051														1.81446
0.386978	0.398245														1.83123
0.26974	0.299652														1.84098
1.01009	1.0408														1.84697
0.303678	0.338812														1.85504
1.04072	1.07173														1.85972
0.950316	1.02515														1.86183
1.50889	1.6352														1.8627
0.544308	0.626281														1.86625
3.55522	3.20301														1.86711
1.53756	1.65936														1.8713
0.454958	0.476986														1.89204
0.535087	0.525138														1.89344
2.07717	1.93931														1.89506
3.32147	3.97229														1.89998
0.468246	0.50662														1.90694
1.5294	1.48106														1.91162
1.35049	1.46935														1.91562
0.479974	0.546816														1.92979
0.992283	1.03275														1.93398
1.67417	1.65211														1.94476
0.452465	0.496494														1.94599
1.11992	1.13294														1.95205
0.871589	0.858425														1.9556
0.498169	0.557229														1.95967
0.578372	0.657411														1.96058
1.15077	0.978894														1.9661
0.790265	0.817151														1.96846
0.275662	0.263015														1.96869
1.05538	1.13572														1.99599
1.03639	1.06907														2.00824
0.705067	0.739084														2.01473
0.832875	0.857225														2.01596
0.809682	0.982797														2.01684
0.33324	0.344518														2.02007
1.75686	1.93708														2.02391
1.06921	1.11581														2.03186
1.22537	1.71182														2.03783
0.528419	0.620204														2.04072
0.398347	0.439122														2.06801
0.893856	0.915897														2.0812
1.13629	1.22232														2.08586
0.536311	0.520521														2.09345
1.38248	1.44073														2.09907
1.22856	1.26735														2.10878
1.10094	1.09337														2.11405
1.0197	1.03101														2.13386
0.187363	0.196047														2.13889
0.266309	0.253989														2.16078
1.82966	1.8523														2.16087
0.414102	0.399133														2.17512
1.12518	1.20016														2.18126
0.559694	0.588461														2.18976
3.47632	3.54963														2.19237
0.610559	0.669685														2.21763
1.42205	1.48643														2.22322
0.587501	0.621224														2.22596
0.579663	0.680283														2.24605
0.54746	0.62526														2.25419
0.975115	1.04218														2.28302
0.981294	1.02644														2.31662
0.953218	0.783631														2.32393
1.16742	1.1141														2.38142
0.956055	1.05457														2.44784
0.206035	0.224585														2.51156
1.70814	1.76231														2.51408
1.69588	1.52314														2.51529
0.922919	0.910743														2.5237
0.923431	0.915546														2.53756
1.53	1.76763														2.5417
0.606848	0.539733														2.55635
1.67222	1.42493														2.55913
0.71534	0.684817														2.57902
0.762861	1.04993														2.58058
0.883552	0.916175														2.59618
0.854415	0.942027														2.59968
0.963415	1.2736														2.61171
1.75962	1.96579														2.65088
0.571625	0.900688														2.71034
0.871998	0.962307														2.75148
1.08715	1.07202														2.75845
0.26881	0.255857														2.80831
0.282183	0.292014														2.91208
0.271683	0.291878														2.97577
0.256489	0.28462														3.03661
0.24236	0.237131														3.05389
0.258483	0.262623														3.11986
0.283293	0.25703														3.1528
0.283127	0.310309														3.23742
0.286464	0.277883														3.24266
0.259587	0.22875														3.28593
0.274772	0.275466														3.32385
0.235646	0.249967														3.34154
															3.37912
															3.51298
															3.56894
															3.64688
															3.95293

## Sheet: Fig5-Fig supp1
Fig.5-Fig. supp.1b								Fig.5-Fig. supp.1c
Human IgG (ng/mL)	ELISA			BLISA					ELISA	BLISA
6400	3.2499	3.0346	3.18	14.3222	14.8168	13.545			1.70995	11.2896
1600	3.2236	3.1627	3.1366	14.3682	14.6754	13.3433			2.3924	12.8904
400	2.8119	2.7858	2.9195	13.3835	13.6842	12.7826			1.55635	11.7079
100	1.6067	1.7352	1.6996	11.9801	12.1043	11.6357			1.41435	11.4439
25	0.7822	0.7157	0.7094	9.64829	10.1547	9.24507			1.7459	11.9078
6.25	0.2262	0.2124	0.21	7.47329	7.96146	6.99851			2.67635	13.2394
1.5625	0.0907	0.0924	0.0793	5.17881	5.5802	4.71153			2.78145	13.0815
0.390625	0.051	0.0506	0.0477	3.13752	3.05977	2.99094			1.6903	11.9982
0.097656	0.0453	0.0839	0.0548	1.56784	2.14845	1.57723			2.89225	13.7123
0.024414	0.0428	0.0429	0.0488	1.02306	1.86819	1.05997			2.3268	12.757
0.006104	0.0587	0.0432	0.0592	0.624504	1.71097	0.987255			1.2419	11.1177
0.001526	0.0422	0.0422	0.0476	0.536478	1.34675	0.743832			2.00235	12.1447
									1.75745	11.9125
									1.39415	11.1539
									1.3595	11.1562
									2.29235	12.5779
									0.93915	10.2355
									2.419	12.5611
									0.7801	9.65002
									2.2204	12.285
									0.755	9.88389
									2.17945	12.0887
									1.1565	10.6636
								Negative	0.51165	8.98534

[truncated: 3 more sheets: Fig5-Fig supp3, Fig6, Fig6-Fig supp1]
