# Supplementary material for: Modular DNA barcoding of nanobodies enables multiplexed in situ protein imaging and high-throughput biomolecule detection
Source: eLife. 2025 Jul 22;14:RP105225. doi: 10.7554/eLife.105225 (PMC12283080; doi:10.7554/eLife.105225)
Supplement: Source data 2. [file elife-105225-data2.xlsx]

## Sheet: GFP, mCherry, and α-tubulin,
Related to Figure 4–Figure Supplement 2
		Ab bc.
		GFP	mCherry	α-tubulin
Well	well_id	ATCACG	CGATGT	CGTGAT
1	ATCACG	18243	662009	25758
	GGCTAC	16172	552107	22317
	GTTTCG	16335	560636	22815
2	CGATGT	21585	386019	19869
	CGTACG	24182	505361	24077
	CTTGTA	25947	497858	25754
3	AGTCAA	62799	433774	27122
	GAGTGG	38639	277827	16354
	TTAGGC	54929	343842	19922
4	AGTTCC	73526	133282	23704
	GGTAGC	84769	166607	28739
	TGACCA	68139	129140	16780
5	ACAGTG	220560	53413	25003
	ACTGAT	228522	59813	26304
	ATGTCA	300645	71661	33905
6	ATGAGC	413431	27025	25756
	CCGTCC	405279	22554	26878
	GCCAAT	247586	21334	19921
7	ATTCCT	469492	13501	21529
	CAGATC	350531	11192	17319
	GTAGAG	411384	13612	20224
8	ACTTGA	550609	13323	27648
	CAAAAG	494423	12461	24212
	GTCCGC	452398	10738	24007
9	CAACTA	515547	13404	20506
	GATCAG	872362	23409	36368
	GTGAAA	545380	13856	23364
NC	CACCGG	13145	10322	38440
	GTGGCC	14521	10100	39947
	TAGCTT	14100	10579	39978

## Sheet: SARS-CoV-2 IgG
Related to Figure 5, and Figure 5–Figure Supplement 1 and 3
Well_BC	Ab_BC	Count	well_id	row_id	col_id	sample	epitope	concentration	plate
AGTCAA	ACAGTG	194013	13	B	1	1	norm_100pM	100pM	S1
AGTCAA	CAGATC	671	13	B	1	1	norm_1pM	1pM	S1
AGTCAA	GCCAAT	15061	13	B	1	1	norm_10pM	10pM	S1
AGTCAA	TTAGGC	6133	13	B	1	1	S_RBD_IgG		S1
ATCACG	ACAGTG	199427	1	A	1	1	norm_100pM	100pM	S1
ATCACG	CAGATC	654	1	A	1	1	norm_1pM	1pM	S1
ATCACG	GCCAAT	15341	1	A	1	1	norm_10pM	10pM	S1
ATCACG	TTAGGC	7218	1	A	1	1	S_RBD_IgG		S1
AGTTCC	ACAGTG	202964	14	B	2	2	norm_100pM	100pM	S1
AGTTCC	CAGATC	699	14	B	2	2	norm_1pM	1pM	S1
AGTTCC	GCCAAT	15489	14	B	2	2	norm_10pM	10pM	S1
AGTTCC	TTAGGC	43320	14	B	2	2	S_RBD_IgG		S1
CGATGT	ACAGTG	196091	2	A	2	2	norm_100pM	100pM	S1
CGATGT	CAGATC	671	2	A	2	2	norm_1pM	1pM	S1
CGATGT	GCCAAT	15362	2	A	2	2	norm_10pM	10pM	S1
CGATGT	TTAGGC	36273	2	A	2	2	S_RBD_IgG		S1
ATGTCA	ACAGTG	240800	15	B	3	3	norm_100pM	100pM	S1
ATGTCA	CAGATC	841	15	B	3	3	norm_1pM	1pM	S1
ATGTCA	GCCAAT	18699	15	B	3	3	norm_10pM	10pM	S1
ATGTCA	TTAGGC	18348	15	B	3	3	S_RBD_IgG		S1
TTAGGC	ACAGTG	151087	3	A	3	3	norm_100pM	100pM	S1
TTAGGC	CAGATC	507	3	A	3	3	norm_1pM	1pM	S1
TTAGGC	GCCAAT	11736	3	A	3	3	norm_10pM	10pM	S1
TTAGGC	TTAGGC	12749	3	A	3	3	S_RBD_IgG		S1
CCGTCC	ACAGTG	176808	16	B	4	4	norm_100pM	100pM	S1
CCGTCC	CAGATC	645	16	B	4	4	norm_1pM	1pM	S1
CCGTCC	GCCAAT	13790	16	B	4	4	norm_10pM	10pM	S1
CCGTCC	TTAGGC	22947	16	B	4	4	S_RBD_IgG		S1
TGACCA	ACAGTG	172799	4	A	4	4	norm_100pM	100pM	S1
TGACCA	CAGATC	617	4	A	4	4	norm_1pM	1pM	S1
TGACCA	GCCAAT	13576	4	A	4	4	norm_10pM	10pM	S1
TGACCA	TTAGGC	20536	4	A	4	4	S_RBD_IgG		S1
ACAGTG	ACAGTG	142299	5	A	5	5	norm_100pM	100pM	S1
ACAGTG	CAGATC	453	5	A	5	5	norm_1pM	1pM	S1
ACAGTG	GCCAAT	11068	5	A	5	5	norm_10pM	10pM	S1
ACAGTG	TTAGGC	5974	5	A	5	5	S_RBD_IgG		S1
GTAGAG	ACAGTG	228602	17	B	5	5	norm_100pM	100pM	S1
GTAGAG	CAGATC	793	17	B	5	5	norm_1pM	1pM	S1
GTAGAG	GCCAAT	17862	17	B	5	5	norm_10pM	10pM	S1
GTAGAG	TTAGGC	10369	17	B	5	5	S_RBD_IgG		S1
GCCAAT	ACAGTG	203676	6	A	6	6	norm_100pM	100pM	S1
GCCAAT	CAGATC	723	6	A	6	6	norm_1pM	1pM	S1
GCCAAT	GCCAAT	16171	6	A	6	6	norm_10pM	10pM	S1
GCCAAT	TTAGGC	13153	6	A	6	6	S_RBD_IgG		S1
GTCCGC	ACAGTG	234317	18	B	6	6	norm_100pM	100pM	S1
GTCCGC	CAGATC	750	18	B	6	6	norm_1pM	1pM	S1
GTCCGC	GCCAAT	17951	18	B	6	6	norm_10pM	10pM	S1
GTCCGC	TTAGGC	17149	18	B	6	6	S_RBD_IgG		S1
CAGATC	ACAGTG	199012	7	A	7	7	norm_100pM	100pM	S1
CAGATC	CAGATC	698	7	A	7	7	norm_1pM	1pM	S1
CAGATC	GCCAAT	15569	7	A	7	7	norm_10pM	10pM	S1
CAGATC	TTAGGC	10656	7	A	7	7	S_RBD_IgG		S1
GTGAAA	ACAGTG	207282	19	B	7	7	norm_100pM	100pM	S1
GTGAAA	CAGATC	723	19	B	7	7	norm_1pM	1pM	S1
GTGAAA	GCCAAT	16209	19	B	7	7	norm_10pM	10pM	S1
GTGAAA	TTAGGC	11916	19	B	7	7	S_RBD_IgG		S1
ACTTGA	ACAGTG	143148	8	A	8	8	norm_100pM	100pM	S1
ACTTGA	CAGATC	501	8	A	8	8	norm_1pM	1pM	S1
ACTTGA	GCCAAT	11211	8	A	8	8	norm_10pM	10pM	S1
ACTTGA	TTAGGC	8644	8	A	8	8	S_RBD_IgG		S1
GTGGCC	ACAGTG	213084	20	B	8	8	norm_100pM	100pM	S1
GTGGCC	CAGATC	767	20	B	8	8	norm_1pM	1pM	S1
GTGGCC	GCCAAT	16499	20	B	8	8	norm_10pM	10pM	S1
GTGGCC	TTAGGC	14046	20	B	8	8	S_RBD_IgG		S1
GATCAG	ACAGTG	196553	9	A	9	9	norm_100pM	100pM	S1
GATCAG	CAGATC	658	9	A	9	9	norm_1pM	1pM	S1
GATCAG	GCCAAT	15308	9	A	9	9	norm_10pM	10pM	S1
GATCAG	TTAGGC	37952	9	A	9	9	S_RBD_IgG		S1
GTTTCG	ACAGTG	179385	21	B	9	9	norm_100pM	100pM	S1
GTTTCG	CAGATC	627	21	B	9	9	norm_1pM	1pM	S1
GTTTCG	GCCAAT	14018	21	B	9	9	norm_10pM	10pM	S1
GTTTCG	TTAGGC	35731	21	B	9	9	S_RBD_IgG		S1
CGTACG	ACAGTG	359468	22	B	10	10	norm_100pM	100pM	S1
CGTACG	CAGATC	1229	22	B	10	10	norm_1pM	1pM	S1
CGTACG	GCCAAT	27472	22	B	10	10	norm_10pM	10pM	S1
CGTACG	TTAGGC	19363	22	B	10	10	S_RBD_IgG		S1
TAGCTT	ACAGTG	284490	10	A	10	10	norm_100pM	100pM	S1
TAGCTT	CAGATC	913	10	A	10	10	norm_1pM	1pM	S1
TAGCTT	GCCAAT	21930	10	A	10	10	norm_10pM	10pM	S1
TAGCTT	TTAGGC	16441	10	A	10	10	S_RBD_IgG		S1
GAGTGG	ACAGTG	150012	23	B	11	11	norm_100pM	100pM	S1
GAGTGG	CAGATC	531	23	B	11	11	norm_1pM	1pM	S1
GAGTGG	GCCAAT	11569	23	B	11	11	norm_10pM	10pM	S1
GAGTGG	TTAGGC	4742	23	B	11	11	S_RBD_IgG		S1
GGCTAC	ACAGTG	175580	11	A	11	11	norm_100pM	100pM	S1
GGCTAC	CAGATC	628	11	A	11	11	norm_1pM	1pM	S1
GGCTAC	GCCAAT	13617	11	A	11	11	norm_10pM	10pM	S1
GGCTAC	TTAGGC	5983	11	A	11	11	S_RBD_IgG		S1
CTTGTA	ACAGTG	190019	12	A	12	12	norm_100pM	100pM	S1
CTTGTA	CAGATC	677	12	A	12	12	norm_1pM	1pM	S1
CTTGTA	GCCAAT	14933	12	A	12	12	norm_10pM	10pM	S1
CTTGTA	TTAGGC	16189	12	A	12	12	S_RBD_IgG		S1
GGTAGC	ACAGTG	163349	24	B	12	12	norm_100pM	100pM	S1
GGTAGC	CAGATC	588	24	B	12	12	norm_1pM	1pM	S1
GGTAGC	GCCAAT	12815	24	B	12	12	norm_10pM	10pM	S1
GGTAGC	TTAGGC	12545	24	B	12	12	S_RBD_IgG		S1
ACTGAT	ACAGTG	216221	25	C	1	13	norm_100pM	100pM	S1
ACTGAT	CAGATC	735	25	C	1	13	norm_1pM	1pM	S1
ACTGAT	GCCAAT	16851	25	C	1	13	norm_10pM	10pM	S1
ACTGAT	TTAGGC	30584	25	C	1	13	S_RBD_IgG		S1
CGGAAT	ACAGTG	192228	37	D	1	13	norm_100pM	100pM	S1
CGGAAT	CAGATC	658	37	D	1	13	norm_1pM	1pM	S1
CGGAAT	GCCAAT	15125	37	D	1	13	norm_10pM	10pM	S1
CGGAAT	TTAGGC	25756	37	D	1	13	S_RBD_IgG		S1
ATGAGC	ACAGTG	201637	26	C	2	14	norm_100pM	100pM	S1
ATGAGC	CAGATC	697	26	C	2	14	norm_1pM	1pM	S1
ATGAGC	GCCAAT	15684	26	C	2	14	norm_10pM	10pM	S1
ATGAGC	TTAGGC	10467	26	C	2	14	S_RBD_IgG		S1
CTAGCT	ACAGTG	205699	38	D	2	14	norm_100pM	100pM	S1
CTAGCT	CAGATC	733	38	D	2	14	norm_1pM	1pM	S1
CTAGCT	GCCAAT	16034	38	D	2	14	norm_10pM	10pM	S1
CTAGCT	TTAGGC	8618	38	D	2	14	S_RBD_IgG		S1
ATTCCT	ACAGTG	233408	27	C	3	15	norm_100pM	100pM	S1
ATTCCT	CAGATC	833	27	C	3	15	norm_1pM	1pM	S1
ATTCCT	GCCAAT	17976	27	C	3	15	norm_10pM	10pM	S1
ATTCCT	TTAGGC	14434	27	C	3	15	S_RBD_IgG		S1
CTATAC	ACAGTG	165318	39	D	3	15	norm_100pM	100pM	S1
CTATAC	CAGATC	566	39	D	3	15	norm_1pM	1pM	S1
CTATAC	GCCAAT	12848	39	D	3	15	norm_10pM	10pM	S1
CTATAC	TTAGGC	10187	39	D	3	15	S_RBD_IgG		S1
CAAAAG	ACAGTG	196876	28	C	4	16	norm_100pM	100pM	S1
CAAAAG	CAGATC	676	28	C	4	16	norm_1pM	1pM	S1
CAAAAG	GCCAAT	15143	28	C	4	16	norm_10pM	10pM	S1
CAAAAG	TTAGGC	8236	28	C	4	16	S_RBD_IgG		S1
CTCAGA	ACAGTG	165994	40	D	4	16	norm_100pM	100pM	S1
CTCAGA	CAGATC	576	40	D	4	16	norm_1pM	1pM	S1
CTCAGA	GCCAAT	12783	40	D	4	16	norm_10pM	10pM	S1
CTCAGA	TTAGGC	6820	40	D	4	16	S_RBD_IgG		S1
CAACTA	ACAGTG	219919	29	C	5	17	norm_100pM	100pM	S1
CAACTA	CAGATC	745	29	C	5	17	norm_1pM	1pM	S1
CAACTA	GCCAAT	16853	29	C	5	17	norm_10pM	10pM	S1
CAACTA	TTAGGC	14104	29	C	5	17	S_RBD_IgG		S1
GACGAC	ACAGTG	227726	41	D	5	17	norm_100pM	100pM	S1
GACGAC	CAGATC	812	41	D	5	17	norm_1pM	1pM	S1
GACGAC	GCCAAT	17528	41	D	5	17	norm_10pM	10pM	S1
GACGAC	TTAGGC	11861	41	D	5	17	S_RBD_IgG		S1
CACCGG	ACAGTG	188604	30	C	6	18	norm_100pM	100pM	S1
CACCGG	CAGATC	645	30	C	6	18	norm_1pM	1pM	S1
CACCGG	GCCAAT	14409	30	C	6	18	norm_10pM	10pM	S1
CACCGG	TTAGGC	24582	30	C	6	18	S_RBD_IgG		S1
TAATCG	ACAGTG	166293	42	D	6	18	norm_100pM	100pM	S1
TAATCG	CAGATC	602	42	D	6	18	norm_1pM	1pM	S1
TAATCG	GCCAAT	12750	42	D	6	18	norm_10pM	10pM	S1
TAATCG	TTAGGC	20471	42	D	6	18	S_RBD_IgG		S1
CACGAT	ACAGTG	210739	31	C	7	19	norm_100pM	100pM	S1
CACGAT	CAGATC	710	31	C	7	19	norm_1pM	1pM	S1
CACGAT	GCCAAT	16142	31	C	7	19	norm_10pM	10pM	S1
CACGAT	TTAGGC	12460	31	C	7	19	S_RBD_IgG		S1
TACAGC	ACAGTG	171656	43	D	7	19	norm_100pM	100pM	S1
TACAGC	CAGATC	539	43	D	7	19	norm_1pM	1pM	S1
TACAGC	GCCAAT	13079	43	D	7	19	norm_10pM	10pM	S1
TACAGC	TTAGGC	9838	43	D	7	19	S_RBD_IgG		S1
CACTCA	ACAGTG	225138	32	C	8	20	norm_100pM	100pM	S1
CACTCA	CAGATC	769	32	C	8	20	norm_1pM	1pM	S1
CACTCA	GCCAAT	17422	32	C	8	20	norm_10pM	10pM	S1
CACTCA	TTAGGC	14526	32	C	8	20	S_RBD_IgG		S1
TATAAT	ACAGTG	196216	44	D	8	20	norm_100pM	100pM	S1
TATAAT	CAGATC	673	44	D	8	20	norm_1pM	1pM	S1
TATAAT	GCCAAT	15160	44	D	8	20	norm_10pM	10pM	S1
TATAAT	TTAGGC	11761	44	D	8	20	S_RBD_IgG		S1
CAGGCG	ACAGTG	190906	33	C	9	21	norm_100pM	100pM	S1
CAGGCG	CAGATC	670	33	C	9	21	norm_1pM	1pM	S1
CAGGCG	GCCAAT	14917	33	C	9	21	norm_10pM	10pM	S1
CAGGCG	TTAGGC	13896	33	C	9	21	S_RBD_IgG		S1
TCATTC	ACAGTG	204909	45	D	9	21	norm_100pM	100pM	S1
TCATTC	CAGATC	716	45	D	9	21	norm_1pM	1pM	S1
TCATTC	GCCAAT	15952	45	D	9	21	norm_10pM	10pM	S1
TCATTC	TTAGGC	14975	45	D	9	21	S_RBD_IgG		S1
CATGGC	ACAGTG	373570	34	C	10	22	norm_100pM	100pM	S1
CATGGC	CAGATC	1255	34	C	10	22	norm_1pM	1pM	S1
CATGGC	GCCAAT	28807	34	C	10	22	norm_10pM	10pM	S1
CATGGC	TTAGGC	32391	34	C	10	22	S_RBD_IgG		S1
TCCCGA	ACAGTG	414238	46	D	10	22	norm_100pM	100pM	S1
TCCCGA	CAGATC	1477	46	D	10	22	norm_1pM	1pM	S1
TCCCGA	GCCAAT	31778	46	D	10	22	norm_10pM	10pM	S1
TCCCGA	TTAGGC	32834	46	D	10	22	S_RBD_IgG		S1
CATTTT	ACAGTG	192631	35	C	11	23	norm_100pM	100pM	S1
CATTTT	CAGATC	638	35	C	11	23	norm_1pM	1pM	S1
CATTTT	GCCAAT	14848	35	C	11	23	norm_10pM	10pM	S1
CATTTT	TTAGGC	30463	35	C	11	23	S_RBD_IgG		S1
TCGAAG	ACAGTG	175610	47	D	11	23	norm_100pM	100pM	S1
TCGAAG	CAGATC	617	47	D	11	23	norm_1pM	1pM	S1
TCGAAG	GCCAAT	13435	47	D	11	23	norm_10pM	10pM	S1
TCGAAG	TTAGGC	28687	47	D	11	23	S_RBD_IgG		S1
CCAACA	ACAGTG	222473	36	C	12	24	norm_100pM	100pM	S1
CCAACA	CAGATC	747	36	C	12	24	norm_1pM	1pM	S1
CCAACA	GCCAAT	17279	36	C	12	24	norm_10pM	10pM	S1
CCAACA	TTAGGC	17684	36	C	12	24	S_RBD_IgG		S1
TCGGCA	ACAGTG	177593	48	D	12	24	norm_100pM	100pM	S1
TCGGCA	CAGATC	624	48	D	12	24	norm_1pM	1pM	S1
TCGGCA	GCCAAT	13762	48	D	12	24	norm_10pM	10pM	S1
TCGGCA	TTAGGC	12514	48	D	12	24	S_RBD_IgG		S1
AACGGA	ACAGTG	232287	61	F	1	25	norm_100pM	100pM	S1
AACGGA	CAGATC	766	61	F	1	25	norm_1pM	1pM	S1
AACGGA	GCCAAT	18130	61	F	1	25	norm_10pM	10pM	S1
AACGGA	TTAGGC	9393	61	F	1	25	S_RBD_IgG		S1
GTACTT	ACAGTG	211692	49	E	1	25	norm_100pM	100pM	S1
GTACTT	CAGATC	742	49	E	1	25	norm_1pM	1pM	S1
GTACTT	GCCAAT	16282	49	E	1	25	norm_10pM	10pM	S1
GTACTT	TTAGGC	8201	49	E	1	25	S_RBD_IgG		S1
ATGGCA	ACAGTG	215339	50	E	2	26	norm_100pM	100pM	S1
ATGGCA	CAGATC	746	50	E	2	26	norm_1pM	1pM	S1
ATGGCA	GCCAAT	16876	50	E	2	26	norm_10pM	10pM	S1
ATGGCA	TTAGGC	4571	50	E	2	26	S_RBD_IgG		S1
GACGAT	ACAGTG	258062	62	F	2	26	norm_100pM	100pM	S1
GACGAT	CAGATC	854	62	F	2	26	norm_1pM	1pM	S1
GACGAT	GCCAAT	20003	62	F	2	26	norm_10pM	10pM	S1
GACGAT	TTAGGC	4662	62	F	2	26	S_RBD_IgG		S1
AAGGAG	ACAGTG	161078	51	E	3	27	norm_100pM	100pM	S1
AAGGAG	CAGATC	563	51	E	3	27	norm_1pM	1pM	S1
AAGGAG	GCCAAT	12546	51	E	3	27	norm_10pM	10pM	S1
AAGGAG	TTAGGC	22263	51	E	3	27	S_RBD_IgG		S1
TTGCGG	ACAGTG	227318	63	F	3	27	norm_100pM	100pM	S1
TTGCGG	CAGATC	764	63	F	3	27	norm_1pM	1pM	S1
TTGCGG	GCCAAT	17522	63	F	3	27	norm_10pM	10pM	S1
TTGCGG	TTAGGC	34079	63	F	3	27	S_RBD_IgG		S1
CAAGTT	ACAGTG	234788	64	F	4	28	norm_100pM	100pM	S1
CAAGTT	CAGATC	834	64	F	4	28	norm_1pM	1pM	S1
CAAGTT	GCCAAT	18033	64	F	4	28	norm_10pM	10pM	S1
CAAGTT	TTAGGC	11225	64	F	4	28	S_RBD_IgG		S1
CTATCT	ACAGTG	128205	52	E	4	28	norm_100pM	100pM	S1
CTATCT	CAGATC	427	52	E	4	28	norm_1pM	1pM	S1
CTATCT	GCCAAT	9911	52	E	4	28	norm_10pM	10pM	S1
CTATCT	TTAGGC	5859	52	E	4	28	S_RBD_IgG		S1
TACCTT	ACAGTG	248057	65	F	5	29	norm_100pM	100pM	S1
TACCTT	CAGATC	903	65	F	5	29	norm_1pM	1pM	S1
TACCTT	GCCAAT	19458	65	F	5	29	norm_10pM	10pM	S1
TACCTT	TTAGGC	15060	65	F	5	29	S_RBD_IgG		S1
TATATC	ACAGTG	187548	53	E	5	29	norm_100pM	100pM	S1
TATATC	CAGATC	692	53	E	5	29	norm_1pM	1pM	S1
TATATC	GCCAAT	14352	53	E	5	29	norm_10pM	10pM	S1
TATATC	TTAGGC	10544	53	E	5	29	S_RBD_IgG		S1
GAGCGC	ACAGTG	185076	66	F	6	30	norm_100pM	100pM	S1
GAGCGC	CAGATC	611	66	F	6	30	norm_1pM	1pM	S1
GAGCGC	GCCAAT	14385	66	F	6	30	norm_10pM	10pM	S1
GAGCGC	TTAGGC	5334	66	F	6	30	S_RBD_IgG		S1
TATTAT	ACAGTG	203099	54	E	6	30	norm_100pM	100pM	S1
TATTAT	CAGATC	705	54	E	6	30	norm_1pM	1pM	S1
TATTAT	GCCAAT	15708	54	E	6	30	norm_10pM	10pM	S1
TATTAT	TTAGGC	5502	54	E	6	30	S_RBD_IgG		S1
ACGAGG	ACAGTG	173374	67	F	7	31	norm_100pM	100pM	S1
ACGAGG	CAGATC	624	67	F	7	31	norm_1pM	1pM	S1
ACGAGG	GCCAAT	13502	67	F	7	31	norm_10pM	10pM	S1
ACGAGG	TTAGGC	18653	67	F	7	31	S_RBD_IgG		S1
AGCACC	ACAGTG	191596	55	E	7	31	norm_100pM	100pM	S1
AGCACC	CAGATC	671	55	E	7	31	norm_1pM	1pM	S1
AGCACC	GCCAAT	14562	55	E	7	31	norm_10pM	10pM	S1
AGCACC	TTAGGC	20126	55	E	7	31	S_RBD_IgG		S1
AATCGT	ACAGTG	215984	68	F	8	32	norm_100pM	100pM	S1
AATCGT	CAGATC	723	68	F	8	32	norm_1pM	1pM	S1
AATCGT	GCCAAT	16687	68	F	8	32	norm_10pM	10pM	S1
AATCGT	TTAGGC	28623	68	F	8	32	S_RBD_IgG		S1
TCCACA	ACAGTG	148286	56	E	8	32	norm_100pM	100pM	S1
TCCACA	CAGATC	475	56	E	8	32	norm_1pM	1pM	S1
TCCACA	GCCAAT	11152	56	E	8	32	norm_10pM	10pM	S1
TCCACA	TTAGGC	17461	56	E	8	32	S_RBD_IgG		S1
GAGTCT	ACAGTG	204469	69	F	9	33	norm_100pM	100pM	S1
GAGTCT	CAGATC	666	69	F	9	33	norm_1pM	1pM	S1
GAGTCT	GCCAAT	15643	69	F	9	33	norm_10pM	10pM	S1
GAGTCT	TTAGGC	31142	69	F	9	33	S_RBD_IgG		S1
TTCTCG	ACAGTG	163454	57	E	9	33	norm_100pM	100pM	S1
TTCTCG	CAGATC	569	57	E	9	33	norm_1pM	1pM	S1
TTCTCG	GCCAAT	12549	57	E	9	33	norm_10pM	10pM	S1
TTCTCG	TTAGGC	26163	57	E	9	33	S_RBD_IgG		S1
AGACCA	ACAGTG	380581	70	F	10	34	norm_100pM	100pM	S1
AGACCA	CAGATC	1394	70	F	10	34	norm_1pM	1pM	S1
AGACCA	GCCAAT	29370	70	F	10	34	norm_10pM	10pM	S1
AGACCA	TTAGGC	50980	70	F	10	34	S_RBD_IgG		S1
TCCTGC	ACAGTG	390775	58	E	10	34	norm_100pM	100pM	S1
TCCTGC	CAGATC	1343	58	E	10	34	norm_1pM	1pM	S1
TCCTGC	GCCAAT	30179	58	E	10	34	norm_10pM	10pM	S1
TCCTGC	TTAGGC	45231	58	E	10	34	S_RBD_IgG		S1
AATTCC	ACAGTG	187522	71	F	11	35	norm_100pM	100pM	S1
AATTCC	CAGATC	661	71	F	11	35	norm_1pM	1pM	S1
AATTCC	GCCAAT	14622	71	F	11	35	norm_10pM	10pM	S1
AATTCC	TTAGGC	30975	71	F	11	35	S_RBD_IgG		S1
CGCGGC	ACAGTG	141285	59	E	11	35	norm_100pM	100pM	S1
CGCGGC	CAGATC	474	59	E	11	35	norm_1pM	1pM	S1
CGCGGC	GCCAAT	11027	59	E	11	35	norm_10pM	10pM	S1
CGCGGC	TTAGGC	24746	59	E	11	35	S_RBD_IgG		S1
AGATGT	ACAGTG	202325	72	F	12	36	norm_100pM	100pM	S1
AGATGT	CAGATC	700	72	F	12	36	norm_1pM	1pM	S1
AGATGT	GCCAAT	15482	72	F	12	36	norm_10pM	10pM	S1
AGATGT	TTAGGC	12549	72	F	12	36	S_RBD_IgG		S1
TGCGCT	ACAGTG	199070	60	E	12	36	norm_100pM	100pM	S1
TGCGCT	CAGATC	710	60	E	12	36	norm_1pM	1pM	S1
TGCGCT	GCCAAT	15181	60	E	12	36	norm_10pM	10pM	S1
TGCGCT	TTAGGC	12683	60	E	12	36	S_RBD_IgG		S1
CTAAGG	ACAGTG	256417	85	H	1	37	norm_100pM	100pM	S1
CTAAGG	CAGATC	924	85	H	1	37	norm_1pM	1pM	S1
CTAAGG	GCCAAT	19724	85	H	1	37	norm_10pM	10pM	S1
CTAAGG	TTAGGC	13057	85	H	1	37	S_RBD_IgG		S1
GGAGAA	ACAGTG	246086	73	G	1	37	norm_100pM	100pM	S1
GGAGAA	CAGATC	822	73	G	1	37	norm_1pM	1pM	S1
GGAGAA	GCCAAT	19170	73	G	1	37	norm_10pM	10pM	S1
GGAGAA	TTAGGC	12057	73	G	1	37	S_RBD_IgG		S1
ATAGAT	ACAGTG	193020	74	G	2	38	norm_100pM	100pM	S1
ATAGAT	CAGATC	697	74	G	2	38	norm_1pM	1pM	S1
ATAGAT	GCCAAT	15002	74	G	2	38	norm_10pM	10pM	S1
ATAGAT	TTAGGC	28780	74	G	2	38	S_RBD_IgG		S1
ATCCAA	ACAGTG	265816	86	H	2	38	norm_100pM	100pM	S1
ATCCAA	CAGATC	925	86	H	2	38	norm_1pM	1pM	S1
ATCCAA	GCCAAT	20685	86	H	2	38	norm_10pM	10pM	S1
ATCCAA	TTAGGC	38920	86	H	2	38	S_RBD_IgG		S1
GTGAGA	ACAGTG	278110	87	H	3	39	norm_100pM	100pM	S1
GTGAGA	CAGATC	987	87	H	3	39	norm_1pM	1pM	S1
GTGAGA	GCCAAT	21389	87	H	3	39	norm_10pM	10pM	S1
GTGAGA	TTAGGC	21841	87	H	3	39	S_RBD_IgG		S1
TATGCA	ACAGTG	276352	75	G	3	39	norm_100pM	100pM	S1
TATGCA	CAGATC	973	75	G	3	39	norm_1pM	1pM	S1
TATGCA	GCCAAT	21492	75	G	3	39	norm_10pM	10pM	S1
TATGCA	TTAGGC	17409	75	G	3	39	S_RBD_IgG		S1
CCTATT	ACAGTG	232292	76	G	4	40	norm_100pM	100pM	S1
CCTATT	CAGATC	797	76	G	4	40	norm_1pM	1pM	S1
CCTATT	GCCAAT	18009	76	G	4	40	norm_10pM	10pM	S1
CCTATT	TTAGGC	15513	76	G	4	40	S_RBD_IgG		S1
TAAGAC	ACAGTG	258444	88	H	4	40	norm_100pM	100pM	S1
TAAGAC	CAGATC	890	88	H	4	40	norm_1pM	1pM	S1
TAAGAC	GCCAAT	19936	88	H	4	40	norm_10pM	10pM	S1
TAAGAC	TTAGGC	17282	88	H	4	40	S_RBD_IgG		S1
CGTTAG	ACAGTG	225064	89	H	5	41	norm_100pM	100pM	S1
CGTTAG	CAGATC	759	89	H	5	41	norm_1pM	1pM	S1
CGTTAG	GCCAAT	17629	89	H	5	41	norm_10pM	10pM	S1
CGTTAG	TTAGGC	11975	89	H	5	41	S_RBD_IgG		S1
TAACCG	ACAGTG	232392	77	G	5	41	norm_100pM	100pM	S1
TAACCG	CAGATC	815	77	G	5	41	norm_1pM	1pM	S1
TAACCG	GCCAAT	17905	77	G	5	41	norm_10pM	10pM	S1
TAACCG	TTAGGC	12429	77	G	5	41	S_RBD_IgG		S1
AGTCTC	ACAGTG	185694	78	G	6	42	norm_100pM	100pM	S1
AGTCTC	CAGATC	650	78	G	6	42	norm_1pM	1pM	S1
AGTCTC	GCCAAT	14495	78	G	6	42	norm_10pM	10pM	S1
AGTCTC	TTAGGC	17856	78	G	6	42	S_RBD_IgG		S1
GTGTAT	ACAGTG	202486	90	H	6	42	norm_100pM	100pM	S1
GTGTAT	CAGATC	706	90	H	6	42	norm_1pM	1pM	S1
GTGTAT	GCCAAT	15552	90	H	6	42	norm_10pM	10pM	S1
GTGTAT	TTAGGC	19966	90	H	6	42	S_RBD_IgG		S1
GAATGC	ACAGTG	226022	91	H	7	43	norm_100pM	100pM	S1
GAATGC	CAGATC	705	91	H	7	43	norm_1pM	1pM	S1
GAATGC	GCCAAT	17659	91	H	7	43	norm_10pM	10pM	S1
GAATGC	TTAGGC	9408	91	H	7	43	S_RBD_IgG		S1
TGGAGC	ACAGTG	225621	79	G	7	43	norm_100pM	100pM	S1
TGGAGC	CAGATC	743	79	G	7	43	norm_1pM	1pM	S1
TGGAGC	GCCAAT	17476	79	G	7	43	norm_10pM	10pM	S1
TGGAGC	TTAGGC	10040	79	G	7	43	S_RBD_IgG		S1
AGAGTA	ACAGTG	237390	92	H	8	44	norm_100pM	100pM	S1
AGAGTA	CAGATC	775	92	H	8	44	norm_1pM	1pM	S1
AGAGTA	GCCAAT	18286	92	H	8	44	norm_10pM	10pM	S1
AGAGTA	TTAGGC	8439	92	H	8	44	S_RBD_IgG		S1
CTGCAT	ACAGTG	187436	80	G	8	44	norm_100pM	100pM	S1
CTGCAT	CAGATC	659	80	G	8	44	norm_1pM	1pM	S1
CTGCAT	GCCAAT	14673	80	G	8	44	norm_10pM	10pM	S1
CTGCAT	TTAGGC	6121	80	G	8	44	S_RBD_IgG		S1
AGTCAA	ACAGTG	195780	13	B	1	45	norm_100pM	100pM	S2
AGTCAA	CAGATC	662	13	B	1	45	norm_1pM	1pM	S2
AGTCAA	GCCAAT	15219	13	B	1	45	norm_10pM	10pM	S2
AGTCAA	TTAGGC	31408	13	B	1	45	S_RBD_IgG		S2
ATCACG	ACAGTG	183723	1	A	1	45	norm_100pM	100pM	S2
ATCACG	CAGATC	618	1	A	1	45	norm_1pM	1pM	S2
ATCACG	GCCAAT	14194	1	A	1	45	norm_10pM	10pM	S2
ATCACG	TTAGGC	23561	1	A	1	45	S_RBD_IgG		S2
AGTTCC	ACAGTG	194503	14	B	2	46	norm_100pM	100pM	S2
AGTTCC	CAGATC	695	14	B	2	46	norm_1pM	1pM	S2
AGTTCC	GCCAAT	14940	14	B	2	46	norm_10pM	10pM	S2
AGTTCC	TTAGGC	6009	14	B	2	46	S_RBD_IgG		S2
CGATGT	ACAGTG	194117	2	A	2	46	norm_100pM	100pM	S2
CGATGT	CAGATC	644	2	A	2	46	norm_1pM	1pM	S2
CGATGT	GCCAAT	14801	2	A	2	46	norm_10pM	10pM	S2
CGATGT	TTAGGC	5880	2	A	2	46	S_RBD_IgG		S2
ATGTCA	ACAGTG	138016	15	B	3	47	norm_100pM	100pM	S2
ATGTCA	CAGATC	483	15	B	3	47	norm_1pM	1pM	S2
ATGTCA	GCCAAT	10688	15	B	3	47	norm_10pM	10pM	S2
ATGTCA	TTAGGC	23252	15	B	3	47	S_RBD_IgG		S2
TTAGGC	ACAGTG	189698	3	A	3	47	norm_100pM	100pM	S2
TTAGGC	CAGATC	647	3	A	3	47	norm_1pM	1pM	S2
TTAGGC	GCCAAT	14851	3	A	3	47	norm_10pM	10pM	S2
TTAGGC	TTAGGC	32809	3	A	3	47	S_RBD_IgG		S2
CCGTCC	ACAGTG	173670	16	B	4	48	norm_100pM	100pM	S2
CCGTCC	CAGATC	637	16	B	4	48	norm_1pM	1pM	S2
CCGTCC	GCCAAT	13638	16	B	4	48	norm_10pM	10pM	S2
CCGTCC	TTAGGC	18568	16	B	4	48	S_RBD_IgG		S2
TGACCA	ACAGTG	193369	4	A	4	48	norm_100pM	100pM	S2
TGACCA	CAGATC	659	4	A	4	48	norm_1pM	1pM	S2
TGACCA	GCCAAT	15200	4	A	4	48	norm_10pM	10pM	S2
TGACCA	TTAGGC	18540	4	A	4	48	S_RBD_IgG		S2
ACAGTG	ACAGTG	252016	5	A	5	49	norm_100pM	100pM	S2
ACAGTG	CAGATC	847	5	A	5	49	norm_1pM	1pM	S2
ACAGTG	GCCAAT	19609	5	A	5	49	norm_10pM	10pM	S2
ACAGTG	TTAGGC	14837	5	A	5	49	S_RBD_IgG		S2
GTAGAG	ACAGTG	191005	17	B	5	49	norm_100pM	100pM	S2
GTAGAG	CAGATC	671	17	B	5	49	norm_1pM	1pM	S2
GTAGAG	GCCAAT	14911	17	B	5	49	norm_10pM	10pM	S2
GTAGAG	TTAGGC	10842	17	B	5	49	S_RBD_IgG		S2
GCCAAT	ACAGTG	201879	6	A	6	50	norm_100pM	100pM	S2
GCCAAT	CAGATC	680	6	A	6	50	norm_1pM	1pM	S2
GCCAAT	GCCAAT	15621	6	A	6	50	norm_10pM	10pM	S2
GCCAAT	TTAGGC	21705	6	A	6	50	S_RBD_IgG		S2
GTCCGC	ACAGTG	174410	18	B	6	50	norm_100pM	100pM	S2
GTCCGC	CAGATC	623	18	B	6	50	norm_1pM	1pM	S2
GTCCGC	GCCAAT	13409	18	B	6	50	norm_10pM	10pM	S2
GTCCGC	TTAGGC	20219	18	B	6	50	S_RBD_IgG		S2
CAGATC	ACAGTG	211353	7	A	7	51	norm_100pM	100pM	S2
CAGATC	CAGATC	727	7	A	7	51	norm_1pM	1pM	S2
CAGATC	GCCAAT	16593	7	A	7	51	norm_10pM	10pM	S2
CAGATC	TTAGGC	11779	7	A	7	51	S_RBD_IgG		S2
GTGAAA	ACAGTG	157714	19	B	7	51	norm_100pM	100pM	S2
GTGAAA	CAGATC	525	19	B	7	51	norm_1pM	1pM	S2
GTGAAA	GCCAAT	12190	19	B	7	51	norm_10pM	10pM	S2
GTGAAA	TTAGGC	8988	19	B	7	51	S_RBD_IgG		S2
ACTTGA	ACAGTG	179079	8	A	8	52	norm_100pM	100pM	S2
ACTTGA	CAGATC	613	8	A	8	52	norm_1pM	1pM	S2
ACTTGA	GCCAAT	13622	8	A	8	52	norm_10pM	10pM	S2
ACTTGA	TTAGGC	11944	8	A	8	52	S_RBD_IgG		S2
GTGGCC	ACAGTG	172005	20	B	8	52	norm_100pM	100pM	S2
GTGGCC	CAGATC	607	20	B	8	52	norm_1pM	1pM	S2
GTGGCC	GCCAAT	13403	20	B	8	52	norm_10pM	10pM	S2
GTGGCC	TTAGGC	12146	20	B	8	52	S_RBD_IgG		S2
GATCAG	ACAGTG	184099	9	A	9	53	norm_100pM	100pM	S2
GATCAG	CAGATC	612	9	A	9	53	norm_1pM	1pM	S2
GATCAG	GCCAAT	14559	9	A	9	53	norm_10pM	10pM	S2
GATCAG	TTAGGC	20263	9	A	9	53	S_RBD_IgG		S2
GTTTCG	ACAGTG	211658	21	B	9	53	norm_100pM	100pM	S2
GTTTCG	CAGATC	717	21	B	9	53	norm_1pM	1pM	S2
GTTTCG	GCCAAT	16346	21	B	9	53	norm_10pM	10pM	S2
GTTTCG	TTAGGC	23426	21	B	9	53	S_RBD_IgG		S2
CGTACG	ACAGTG	146282	22	B	10	54	norm_100pM	100pM	S2
CGTACG	CAGATC	449	22	B	10	54	norm_1pM	1pM	S2
CGTACG	GCCAAT	11389	22	B	10	54	norm_10pM	10pM	S2
CGTACG	TTAGGC	14062	22	B	10	54	S_RBD_IgG		S2
TAGCTT	ACAGTG	185322	10	A	10	54	norm_100pM	100pM	S2
TAGCTT	CAGATC	656	10	A	10	54	norm_1pM	1pM	S2
TAGCTT	GCCAAT	14395	10	A	10	54	norm_10pM	10pM	S2
TAGCTT	TTAGGC	18108	10	A	10	54	S_RBD_IgG		S2
GAGTGG	ACAGTG	186042	23	B	11	55	norm_100pM	100pM	S2
GAGTGG	CAGATC	619	23	B	11	55	norm_1pM	1pM	S2
GAGTGG	GCCAAT	14401	23	B	11	55	norm_10pM	10pM	S2
GAGTGG	TTAGGC	3602	23	B	11	55	S_RBD_IgG		S2
GGCTAC	ACAGTG	161534	11	A	11	55	norm_100pM	100pM	S2
GGCTAC	CAGATC	578	11	A	11	55	norm_1pM	1pM	S2
GGCTAC	GCCAAT	12890	11	A	11	55	norm_10pM	10pM	S2
GGCTAC	TTAGGC	3612	11	A	11	55	S_RBD_IgG		S2
CTTGTA	ACAGTG	199760	12	A	12	56	norm_100pM	100pM	S2
CTTGTA	CAGATC	684	12	A	12	56	norm_1pM	1pM	S2
CTTGTA	GCCAAT	15444	12	A	12	56	norm_10pM	10pM	S2
CTTGTA	TTAGGC	16826	12	A	12	56	S_RBD_IgG		S2
GGTAGC	ACAGTG	181576	24	B	12	56	norm_100pM	100pM	S2
GGTAGC	CAGATC	614	24	B	12	56	norm_1pM	1pM	S2
GGTAGC	GCCAAT	14275	24	B	12	56	norm_10pM	10pM	S2
GGTAGC	TTAGGC	15754	24	B	12	56	S_RBD_IgG		S2
ACTGAT	ACAGTG	167924	25	C	1	57	norm_100pM	100pM	S2
ACTGAT	CAGATC	560	25	C	1	57	norm_1pM	1pM	S2
ACTGAT	GCCAAT	12943	25	C	1	57	norm_10pM	10pM	S2
ACTGAT	TTAGGC	22612	25	C	1	57	S_RBD_IgG		S2
CGGAAT	ACAGTG	224661	37	D	1	57	norm_100pM	100pM	S2
CGGAAT	CAGATC	786	37	D	1	57	norm_1pM	1pM	S2
CGGAAT	GCCAAT	17641	37	D	1	57	norm_10pM	10pM	S2
CGGAAT	TTAGGC	32152	37	D	1	57	S_RBD_IgG		S2
ATGAGC	ACAGTG	272317	26	C	2	58	norm_100pM	100pM	S2
ATGAGC	CAGATC	891	26	C	2	58	norm_1pM	1pM	S2
ATGAGC	GCCAAT	21142	26	C	2	58	norm_10pM	10pM	S2
ATGAGC	TTAGGC	16555	26	C	2	58	S_RBD_IgG		S2
CTAGCT	ACAGTG	196798	38	D	2	58	norm_100pM	100pM	S2
CTAGCT	CAGATC	629	38	D	2	58	norm_1pM	1pM	S2
CTAGCT	GCCAAT	15341	38	D	2	58	norm_10pM	10pM	S2
CTAGCT	TTAGGC	12168	38	D	2	58	S_RBD_IgG		S2
ATTCCT	ACAGTG	215053	27	C	3	59	norm_100pM	100pM	S2
ATTCCT	CAGATC	725	27	C	3	59	norm_1pM	1pM	S2
ATTCCT	GCCAAT	16801	27	C	3	59	norm_10pM	10pM	S2
ATTCCT	TTAGGC	9188	27	C	3	59	S_RBD_IgG		S2
CTATAC	ACAGTG	162086	39	D	3	59	norm_100pM	100pM	S2
CTATAC	CAGATC	552	39	D	3	59	norm_1pM	1pM	S2
CTATAC	GCCAAT	12767	39	D	3	59	norm_10pM	10pM	S2
CTATAC	TTAGGC	8294	39	D	3	59	S_RBD_IgG		S2
CAAAAG	ACAGTG	158086	28	C	4	60	norm_100pM	100pM	S2
CAAAAG	CAGATC	534	28	C	4	60	norm_1pM	1pM	S2
CAAAAG	GCCAAT	12125	28	C	4	60	norm_10pM	10pM	S2
CAAAAG	TTAGGC	33859	28	C	4	60	S_RBD_IgG		S2
CTCAGA	ACAGTG	173553	40	D	4	60	norm_100pM	100pM	S2
CTCAGA	CAGATC	589	40	D	4	60	norm_1pM	1pM	S2
CTCAGA	GCCAAT	13225	40	D	4	60	norm_10pM	10pM	S2
CTCAGA	TTAGGC	35846	40	D	4	60	S_RBD_IgG		S2
CAACTA	ACAGTG	220150	29	C	5	61	norm_100pM	100pM	S2
CAACTA	CAGATC	709	29	C	5	61	norm_1pM	1pM	S2
CAACTA	GCCAAT	16966	29	C	5	61	norm_10pM	10pM	S2
CAACTA	TTAGGC	4803	29	C	5	61	S_RBD_IgG		S2
GACGAC	ACAGTG	155768	41	D	5	61	norm_100pM	100pM	S2
GACGAC	CAGATC	540	41	D	5	61	norm_1pM	1pM	S2
GACGAC	GCCAAT	12155	41	D	5	61	norm_10pM	10pM	S2
GACGAC	TTAGGC	3448	41	D	5	61	S_RBD_IgG		S2
CACCGG	ACAGTG	171068	30	C	6	62	norm_100pM	100pM	S2
CACCGG	CAGATC	615	30	C	6	62	norm_1pM	1pM	S2
CACCGG	GCCAAT	13184	30	C	6	62	norm_10pM	10pM	S2
CACCGG	TTAGGC	11398	30	C	6	62	S_RBD_IgG		S2
TAATCG	ACAGTG	151891	42	D	6	62	norm_100pM	100pM	S2
TAATCG	CAGATC	529	42	D	6	62	norm_1pM	1pM	S2
TAATCG	GCCAAT	11750	42	D	6	62	norm_10pM	10pM	S2
TAATCG	TTAGGC	10560	42	D	6	62	S_RBD_IgG		S2
CACGAT	ACAGTG	186009	31	C	7	63	norm_100pM	100pM	S2
CACGAT	CAGATC	705	31	C	7	63	norm_1pM	1pM	S2
CACGAT	GCCAAT	14557	31	C	7	63	norm_10pM	10pM	S2
CACGAT	TTAGGC	13799	31	C	7	63	S_RBD_IgG		S2
TACAGC	ACAGTG	176534	43	D	7	63	norm_100pM	100pM	S2
TACAGC	CAGATC	601	43	D	7	63	norm_1pM	1pM	S2
TACAGC	GCCAAT	13761	43	D	7	63	norm_10pM	10pM	S2
TACAGC	TTAGGC	13319	43	D	7	63	S_RBD_IgG		S2
CACTCA	ACAGTG	192756	32	C	8	64	norm_100pM	100pM	S2
CACTCA	CAGATC	689	32	C	8	64	norm_1pM	1pM	S2
CACTCA	GCCAAT	14841	32	C	8	64	norm_10pM	10pM	S2
CACTCA	TTAGGC	7236	32	C	8	64	S_RBD_IgG		S2
TATAAT	ACAGTG	221304	44	D	8	64	norm_100pM	100pM	S2
TATAAT	CAGATC	738	44	D	8	64	norm_1pM	1pM	S2
TATAAT	GCCAAT	17287	44	D	8	64	norm_10pM	10pM	S2
TATAAT	TTAGGC	9088	44	D	8	64	S_RBD_IgG		S2
CAGGCG	ACAGTG	180219	33	C	9	65	norm_100pM	100pM	S2
CAGGCG	CAGATC	628	33	C	9	65	norm_1pM	1pM	S2
CAGGCG	GCCAAT	14194	33	C	9	65	norm_10pM	10pM	S2
CAGGCG	TTAGGC	12451	33	C	9	65	S_RBD_IgG		S2
TCATTC	ACAGTG	160289	45	D	9	65	norm_100pM	100pM	S2
TCATTC	CAGATC	514	45	D	9	65	norm_1pM	1pM	S2
TCATTC	GCCAAT	12333	45	D	9	65	norm_10pM	10pM	S2
TCATTC	TTAGGC	13178	45	D	9	65	S_RBD_IgG		S2
CATGGC	ACAGTG	182412	34	C	10	66	norm_100pM	100pM	S2
CATGGC	CAGATC	634	34	C	10	66	norm_1pM	1pM	S2
CATGGC	GCCAAT	14127	34	C	10	66	norm_10pM	10pM	S2
CATGGC	TTAGGC	20937	34	C	10	66	S_RBD_IgG		S2
TCCCGA	ACAGTG	192262	46	D	10	66	norm_100pM	100pM	S2
TCCCGA	CAGATC	686	46	D	10	66	norm_1pM	1pM	S2
TCCCGA	GCCAAT	14761	46	D	10	66	norm_10pM	10pM	S2
TCCCGA	TTAGGC	23797	46	D	10	66	S_RBD_IgG		S2
CATTTT	ACAGTG	136283	35	C	11	67	norm_100pM	100pM	S2
CATTTT	CAGATC	462	35	C	11	67	norm_1pM	1pM	S2
CATTTT	GCCAAT	10465	35	C	11	67	norm_10pM	10pM	S2
CATTTT	TTAGGC	7836	35	C	11	67	S_RBD_IgG		S2
TCGAAG	ACAGTG	144345	47	D	11	67	norm_100pM	100pM	S2
TCGAAG	CAGATC	542	47	D	11	67	norm_1pM	1pM	S2
TCGAAG	GCCAAT	11161	47	D	11	67	norm_10pM	10pM	S2
TCGAAG	TTAGGC	9693	47	D	11	67	S_RBD_IgG		S2
CCAACA	ACAGTG	186272	36	C	12	68	norm_100pM	100pM	S2
CCAACA	CAGATC	572	36	C	12	68	norm_1pM	1pM	S2
CCAACA	GCCAAT	14453	36	C	12	68	norm_10pM	10pM	S2
CCAACA	TTAGGC	29545	36	C	12	68	S_RBD_IgG		S2
TCGGCA	ACAGTG	201029	48	D	12	68	norm_100pM	100pM	S2
TCGGCA	CAGATC	713	48	D	12	68	norm_1pM	1pM	S2
TCGGCA	GCCAAT	15773	48	D	12	68	norm_10pM	10pM	S2
TCGGCA	TTAGGC	31603	48	D	12	68	S_RBD_IgG		S2
AACGGA	ACAGTG	181473	61	F	1	69	norm_100pM	100pM	S2
AACGGA	CAGATC	625	61	F	1	69	norm_1pM	1pM	S2
AACGGA	GCCAAT	13899	61	F	1	69	norm_10pM	10pM	S2
AACGGA	TTAGGC	8701	61	F	1	69	S_RBD_IgG		S2
GTACTT	ACAGTG	224630	49	E	1	69	norm_100pM	100pM	S2
GTACTT	CAGATC	732	49	E	1	69	norm_1pM	1pM	S2
GTACTT	GCCAAT	17318	49	E	1	69	norm_10pM	10pM	S2
GTACTT	TTAGGC	9745	49	E	1	69	S_RBD_IgG		S2
ATGGCA	ACAGTG	208888	50	E	2	70	norm_100pM	100pM	S2
ATGGCA	CAGATC	748	50	E	2	70	norm_1pM	1pM	S2
ATGGCA	GCCAAT	16338	50	E	2	70	norm_10pM	10pM	S2
ATGGCA	TTAGGC	28706	50	E	2	70	S_RBD_IgG		S2
GACGAT	ACAGTG	213193	62	F	2	70	norm_100pM	100pM	S2
GACGAT	CAGATC	757	62	F	2	70	norm_1pM	1pM	S2
GACGAT	GCCAAT	16488	62	F	2	70	norm_10pM	10pM	S2
GACGAT	TTAGGC	28037	62	F	2	70	S_RBD_IgG		S2
AAGGAG	ACAGTG	173473	51	E	3	71	norm_100pM	100pM	S2
AAGGAG	CAGATC	602	51	E	3	71	norm_1pM	1pM	S2
AAGGAG	GCCAAT	13539	51	E	3	71	norm_10pM	10pM	S2
AAGGAG	TTAGGC	19301	51	E	3	71	S_RBD_IgG		S2
TTGCGG	ACAGTG	151679	63	F	3	71	norm_100pM	100pM	S2
TTGCGG	CAGATC	547	63	F	3	71	norm_1pM	1pM	S2
TTGCGG	GCCAAT	11622	63	F	3	71	norm_10pM	10pM	S2
TTGCGG	TTAGGC	15825	63	F	3	71	S_RBD_IgG		S2
CAAGTT	ACAGTG	175991	64	F	4	72	norm_100pM	100pM	S2
CAAGTT	CAGATC	615	64	F	4	72	norm_1pM	1pM	S2
CAAGTT	GCCAAT	13650	64	F	4	72	norm_10pM	10pM	S2
CAAGTT	TTAGGC	8811	64	F	4	72	S_RBD_IgG		S2
CTATCT	ACAGTG	205093	52	E	4	72	norm_100pM	100pM	S2
CTATCT	CAGATC	714	52	E	4	72	norm_1pM	1pM	S2
CTATCT	GCCAAT	15838	52	E	4	72	norm_10pM	10pM	S2
CTATCT	TTAGGC	8695	52	E	4	72	S_RBD_IgG		S2
TACCTT	ACAGTG	208431	65	F	5	73	norm_100pM	100pM	S2
TACCTT	CAGATC	688	65	F	5	73	norm_1pM	1pM	S2
TACCTT	GCCAAT	16241	65	F	5	73	norm_10pM	10pM	S2
TACCTT	TTAGGC	30934	65	F	5	73	S_RBD_IgG		S2
TATATC	ACAGTG	200656	53	E	5	73	norm_100pM	100pM	S2
TATATC	CAGATC	724	53	E	5	73	norm_1pM	1pM	S2
TATATC	GCCAAT	15488	53	E	5	73	norm_10pM	10pM	S2
TATATC	TTAGGC	26299	53	E	5	73	S_RBD_IgG		S2
GAGCGC	ACAGTG	156930	66	F	6	74	norm_100pM	100pM	S2
GAGCGC	CAGATC	542	66	F	6	74	norm_1pM	1pM	S2
GAGCGC	GCCAAT	12127	66	F	6	74	norm_10pM	10pM	S2
GAGCGC	TTAGGC	6940	66	F	6	74	S_RBD_IgG		S2
TATTAT	ACAGTG	213038	54	E	6	74	norm_100pM	100pM	S2
TATTAT	CAGATC	703	54	E	6	74	norm_1pM	1pM	S2
TATTAT	GCCAAT	16280	54	E	6	74	norm_10pM	10pM	S2
TATTAT	TTAGGC	9248	54	E	6	74	S_RBD_IgG		S2
ACGAGG	ACAGTG	191161	67	F	7	75	norm_100pM	100pM	S2
ACGAGG	CAGATC	643	67	F	7	75	norm_1pM	1pM	S2
ACGAGG	GCCAAT	14764	67	F	7	75	norm_10pM	10pM	S2
ACGAGG	TTAGGC	10919	67	F	7	75	S_RBD_IgG		S2
AGCACC	ACAGTG	208891	55	E	7	75	norm_100pM	100pM	S2
AGCACC	CAGATC	670	55	E	7	75	norm_1pM	1pM	S2
AGCACC	GCCAAT	15954	55	E	7	75	norm_10pM	10pM	S2
AGCACC	TTAGGC	11751	55	E	7	75	S_RBD_IgG		S2
AATCGT	ACAGTG	162204	68	F	8	76	norm_100pM	100pM	S2
AATCGT	CAGATC	607	68	F	8	76	norm_1pM	1pM	S2
AATCGT	GCCAAT	12515	68	F	8	76	norm_10pM	10pM	S2
AATCGT	TTAGGC	10436	68	F	8	76	S_RBD_IgG		S2
TCCACA	ACAGTG	183524	56	E	8	76	norm_100pM	100pM	S2
TCCACA	CAGATC	610	56	E	8	76	norm_1pM	1pM	S2
TCCACA	GCCAAT	14060	56	E	8	76	norm_10pM	10pM	S2
TCCACA	TTAGGC	11013	56	E	8	76	S_RBD_IgG		S2
GAGTCT	ACAGTG	206431	69	F	9	77	norm_100pM	100pM	S2
GAGTCT	CAGATC	673	69	F	9	77	norm_1pM	1pM	S2
GAGTCT	GCCAAT	16058	69	F	9	77	norm_10pM	10pM	S2
GAGTCT	TTAGGC	24194	69	F	9	77	S_RBD_IgG		S2
TTCTCG	ACAGTG	171906	57	E	9	77	norm_100pM	100pM	S2
TTCTCG	CAGATC	631	57	E	9	77	norm_1pM	1pM	S2
TTCTCG	GCCAAT	13596	57	E	9	77	norm_10pM	10pM	S2
TTCTCG	TTAGGC	20896	57	E	9	77	S_RBD_IgG		S2
AGACCA	ACAGTG	161097	70	F	10	78	norm_100pM	100pM	S2
AGACCA	CAGATC	539	70	F	10	78	norm_1pM	1pM	S2
AGACCA	GCCAAT	12556	70	F	10	78	norm_10pM	10pM	S2
AGACCA	TTAGGC	9180	70	F	10	78	S_RBD_IgG		S2
TCCTGC	ACAGTG	141966	58	E	10	78	norm_100pM	100pM	S2
TCCTGC	CAGATC	496	58	E	10	78	norm_1pM	1pM	S2
TCCTGC	GCCAAT	11230	58	E	10	78	norm_10pM	10pM	S2
TCCTGC	TTAGGC	7679	58	E	10	78	S_RBD_IgG		S2
AATTCC	ACAGTG	191271	71	F	11	79	norm_100pM	100pM	S2
AATTCC	CAGATC	653	71	F	11	79	norm_1pM	1pM	S2
AATTCC	GCCAAT	14613	71	F	11	79	norm_10pM	10pM	S2
AATTCC	TTAGGC	8844	71	F	11	79	S_RBD_IgG		S2
CGCGGC	ACAGTG	208745	59	E	11	79	norm_100pM	100pM	S2
CGCGGC	CAGATC	698	59	E	11	79	norm_1pM	1pM	S2
CGCGGC	GCCAAT	16090	59	E	11	79	norm_10pM	10pM	S2
CGCGGC	TTAGGC	8561	59	E	11	79	S_RBD_IgG		S2
AGATGT	ACAGTG	174495	72	F	12	80	norm_100pM	100pM	S2
AGATGT	CAGATC	632	72	F	12	80	norm_1pM	1pM	S2
AGATGT	GCCAAT	13575	72	F	12	80	norm_10pM	10pM	S2
AGATGT	TTAGGC	11154	72	F	12	80	S_RBD_IgG		S2
TGCGCT	ACAGTG	224987	60	E	12	80	norm_100pM	100pM	S2
TGCGCT	CAGATC	772	60	E	12	80	norm_1pM	1pM	S2
TGCGCT	GCCAAT	17667	60	E	12	80	norm_10pM	10pM	S2
TGCGCT	TTAGGC	12643	60	E	12	80	S_RBD_IgG		S2
CTAAGG	ACAGTG	232967	85	H	1	81	norm_100pM	100pM	S2
CTAAGG	CAGATC	744	85	H	1	81	norm_1pM	1pM	S2
CTAAGG	GCCAAT	18042	85	H	1	81	norm_10pM	10pM	S2
CTAAGG	TTAGGC	17812	85	H	1	81	S_RBD_IgG		S2
GGAGAA	ACAGTG	207454	73	G	1	81	norm_100pM	100pM	S2
GGAGAA	CAGATC	697	73	G	1	81	norm_1pM	1pM	S2
GGAGAA	GCCAAT	16283	73	G	1	81	norm_10pM	10pM	S2
GGAGAA	TTAGGC	15349	73	G	1	81	S_RBD_IgG		S2
ATAGAT	ACAGTG	147704	74	G	2	82	norm_100pM	100pM	S2
ATAGAT	CAGATC	515	74	G	2	82	norm_1pM	1pM	S2
ATAGAT	GCCAAT	11458	74	G	2	82	norm_10pM	10pM	S2
ATAGAT	TTAGGC	12014	74	G	2	82	S_RBD_IgG		S2
ATCCAA	ACAGTG	236264	86	H	2	82	norm_100pM	100pM	S2
ATCCAA	CAGATC	868	86	H	2	82	norm_1pM	1pM	S2
ATCCAA	GCCAAT	18365	86	H	2	82	norm_10pM	10pM	S2
ATCCAA	TTAGGC	20236	86	H	2	82	S_RBD_IgG		S2
GTGAGA	ACAGTG	191192	87	H	3	83	norm_100pM	100pM	S2
GTGAGA	CAGATC	652	87	H	3	83	norm_1pM	1pM	S2
GTGAGA	GCCAAT	15198	87	H	3	83	norm_10pM	10pM	S2
GTGAGA	TTAGGC	18047	87	H	3	83	S_RBD_IgG		S2
TATGCA	ACAGTG	148383	75	G	3	83	norm_100pM	100pM	S2
TATGCA	CAGATC	516	75	G	3	83	norm_1pM	1pM	S2
TATGCA	GCCAAT	11677	75	G	3	83	norm_10pM	10pM	S2
TATGCA	TTAGGC	13341	75	G	3	83	S_RBD_IgG		S2
CCTATT	ACAGTG	195925	76	G	4	84	norm_100pM	100pM	S2
CCTATT	CAGATC	673	76	G	4	84	norm_1pM	1pM	S2
CCTATT	GCCAAT	15169	76	G	4	84	norm_10pM	10pM	S2
CCTATT	TTAGGC	16031	76	G	4	84	S_RBD_IgG		S2
TAAGAC	ACAGTG	259638	88	H	4	84	norm_100pM	100pM	S2
TAAGAC	CAGATC	945	88	H	4	84	norm_1pM	1pM	S2
TAAGAC	GCCAAT	20307	88	H	4	84	norm_10pM	10pM	S2
TAAGAC	TTAGGC	24034	88	H	4	84	S_RBD_IgG		S2
CGTTAG	ACAGTG	209700	89	H	5	85	norm_100pM	100pM	S2
CGTTAG	CAGATC	718	89	H	5	85	norm_1pM	1pM	S2
CGTTAG	GCCAAT	16214	89	H	5	85	norm_10pM	10pM	S2
CGTTAG	TTAGGC	15939	89	H	5	85	S_RBD_IgG		S2
TAACCG	ACAGTG	188211	77	G	5	85	norm_100pM	100pM	S2
TAACCG	CAGATC	665	77	G	5	85	norm_1pM	1pM	S2
TAACCG	GCCAAT	14603	77	G	5	85	norm_10pM	10pM	S2
TAACCG	TTAGGC	13499	77	G	5	85	S_RBD_IgG		S2
AGTCTC	ACAGTG	168801	78	G	6	86	norm_100pM	100pM	S2
AGTCTC	CAGATC	548	78	G	6	86	norm_1pM	1pM	S2
AGTCTC	GCCAAT	13014	78	G	6	86	norm_10pM	10pM	S2
AGTCTC	TTAGGC	35196	78	G	6	86	S_RBD_IgG		S2
GTGTAT	ACAGTG	173906	90	H	6	86	norm_100pM	100pM	S2
GTGTAT	CAGATC	597	90	H	6	86	norm_1pM	1pM	S2
GTGTAT	GCCAAT	13446	90	H	6	86	norm_10pM	10pM	S2
GTGTAT	TTAGGC	37816	90	H	6	86	S_RBD_IgG		S2
GAATGC	ACAGTG	207081	91	H	7	87	norm_100pM	100pM	S2
GAATGC	CAGATC	701	91	H	7	87	norm_1pM	1pM	S2
GAATGC	GCCAAT	16131	91	H	7	87	norm_10pM	10pM	S2
GAATGC	TTAGGC	23333	91	H	7	87	S_RBD_IgG		S2
TGGAGC	ACAGTG	158364	79	G	7	87	norm_100pM	100pM	S2
TGGAGC	CAGATC	548	79	G	7	87	norm_1pM	1pM	S2
TGGAGC	GCCAAT	12319	79	G	7	87	norm_10pM	10pM	S2
TGGAGC	TTAGGC	18068	79	G	7	87	S_RBD_IgG		S2
AGAGTA	ACAGTG	225748	92	H	8	88	norm_100pM	100pM	S2
AGAGTA	CAGATC	810	92	H	8	88	norm_1pM	1pM	S2
AGAGTA	GCCAAT	17586	92	H	8	88	norm_10pM	10pM	S2
AGAGTA	TTAGGC	27367	92	H	8	88	S_RBD_IgG		S2
CTGCAT	ACAGTG	226428	80	G	8	88	norm_100pM	100pM	S2
CTGCAT	CAGATC	818	80	G	8	88	norm_1pM	1pM	S2
CTGCAT	GCCAAT	17639	80	G	8	88	norm_10pM	10pM	S2
CTGCAT	TTAGGC	26547	80	G	8	88	S_RBD_IgG		S2
AGTCAA	ACAGTG	156954	13	B	1	89	norm_100pM	100pM	S3
AGTCAA	CAGATC	540	13	B	1	89	norm_1pM	1pM	S3
AGTCAA	GCCAAT	12287	13	B	1	89	norm_10pM	10pM	S3
AGTCAA	TTAGGC	32966	13	B	1	89	S_RBD_IgG		S3
ATCACG	ACAGTG	125199	1	A	1	89	norm_100pM	100pM	S3
ATCACG	CAGATC	427	1	A	1	89	norm_1pM	1pM	S3
ATCACG	GCCAAT	9524	1	A	1	89	norm_10pM	10pM	S3
ATCACG	TTAGGC	23602	1	A	1	89	S_RBD_IgG		S3
AGTTCC	ACAGTG	157317	14	B	2	90	norm_100pM	100pM	S3
AGTTCC	CAGATC	569	14	B	2	90	norm_1pM	1pM	S3
AGTTCC	GCCAAT	12106	14	B	2	90	norm_10pM	10pM	S3
AGTTCC	TTAGGC	13796	14	B	2	90	S_RBD_IgG		S3
CGATGT	ACAGTG	194590	2	A	2	90	norm_100pM	100pM	S3
CGATGT	CAGATC	695	2	A	2	90	norm_1pM	1pM	S3
CGATGT	GCCAAT	14922	2	A	2	90	norm_10pM	10pM	S3
CGATGT	TTAGGC	16458	2	A	2	90	S_RBD_IgG		S3
ATGTCA	ACAGTG	122727	15	B	3	91	norm_100pM	100pM	S3
ATGTCA	CAGATC	434	15	B	3	91	norm_1pM	1pM	S3
ATGTCA	GCCAAT	9868	15	B	3	91	norm_10pM	10pM	S3
ATGTCA	TTAGGC	14394	15	B	3	91	S_RBD_IgG		S3
TTAGGC	ACAGTG	159123	3	A	3	91	norm_100pM	100pM	S3
TTAGGC	CAGATC	559	3	A	3	91	norm_1pM	1pM	S3
TTAGGC	GCCAAT	12457	3	A	3	91	norm_10pM	10pM	S3
TTAGGC	TTAGGC	17238	3	A	3	91	S_RBD_IgG		S3
CCGTCC	ACAGTG	141687	16	B	4	92	norm_100pM	100pM	S3
CCGTCC	CAGATC	473	16	B	4	92	norm_1pM	1pM	S3
CCGTCC	GCCAAT	11335	16	B	4	92	norm_10pM	10pM	S3
CCGTCC	TTAGGC	10616	16	B	4	92	S_RBD_IgG		S3
TGACCA	ACAGTG	209850	4	A	4	92	norm_100pM	100pM	S3
TGACCA	CAGATC	747	4	A	4	92	norm_1pM	1pM	S3
TGACCA	GCCAAT	16432	4	A	4	92	norm_10pM	10pM	S3
TGACCA	TTAGGC	14308	4	A	4	92	S_RBD_IgG		S3
ACAGTG	ACAGTG	148581	5	A	5	93	norm_100pM	100pM	S3
ACAGTG	CAGATC	516	5	A	5	93	norm_1pM	1pM	S3
ACAGTG	GCCAAT	11476	5	A	5	93	norm_10pM	10pM	S3
ACAGTG	TTAGGC	3261	5	A	5	93	S_RBD_IgG		S3
GTAGAG	ACAGTG	108531	17	B	5	93	norm_100pM	100pM	S3
GTAGAG	CAGATC	378	17	B	5	93	norm_1pM	1pM	S3
GTAGAG	GCCAAT	8364	17	B	5	93	norm_10pM	10pM	S3
GTAGAG	TTAGGC	2668	17	B	5	93	S_RBD_IgG		S3
GCCAAT	ACAGTG	139828	6	A	6	94	norm_100pM	100pM	S3
GCCAAT	CAGATC	467	6	A	6	94	norm_1pM	1pM	S3
GCCAAT	GCCAAT	10914	6	A	6	94	norm_10pM	10pM	S3
GCCAAT	TTAGGC	6704	6	A	6	94	S_RBD_IgG		S3
GTCCGC	ACAGTG	133525	18	B	6	94	norm_100pM	100pM	S3
GTCCGC	CAGATC	456	18	B	6	94	norm_1pM	1pM	S3
GTCCGC	GCCAAT	10384	18	B	6	94	norm_10pM	10pM	S3
GTCCGC	TTAGGC	6662	18	B	6	94	S_RBD_IgG		S3
CAGATC	ACAGTG	166768	7	A	7	95	norm_100pM	100pM	S3
CAGATC	CAGATC	559	7	A	7	95	norm_1pM	1pM	S3
CAGATC	GCCAAT	12942	7	A	7	95	norm_10pM	10pM	S3
CAGATC	TTAGGC	20755	7	A	7	95	S_RBD_IgG		S3
GTGAAA	ACAGTG	115782	19	B	7	95	norm_100pM	100pM	S3
GTGAAA	CAGATC	401	19	B	7	95	norm_1pM	1pM	S3
GTGAAA	GCCAAT	9118	19	B	7	95	norm_10pM	10pM	S3
GTGAAA	TTAGGC	14710	19	B	7	95	S_RBD_IgG		S3
ACTTGA	ACAGTG	166216	8	A	8	96	norm_100pM	100pM	S3
ACTTGA	CAGATC	559	8	A	8	96	norm_1pM	1pM	S3
ACTTGA	GCCAAT	13087	8	A	8	96	norm_10pM	10pM	S3
ACTTGA	TTAGGC	9752	8	A	8	96	S_RBD_IgG		S3
GTGGCC	ACAGTG	144107	20	B	8	96	norm_100pM	100pM	S3
GTGGCC	CAGATC	511	20	B	8	96	norm_1pM	1pM	S3
GTGGCC	GCCAAT	11244	20	B	8	96	norm_10pM	10pM	S3
GTGGCC	TTAGGC	9458	20	B	8	96	S_RBD_IgG		S3
GATCAG	ACAGTG	143546	9	A	9	97	norm_100pM	100pM	S3
GATCAG	CAGATC	519	9	A	9	97	norm_1pM	1pM	S3
GATCAG	GCCAAT	11057	9	A	9	97	norm_10pM	10pM	S3
GATCAG	TTAGGC	18593	9	A	9	97	S_RBD_IgG		S3
GTTTCG	ACAGTG	90212	21	B	9	97	norm_100pM	100pM	S3
GTTTCG	CAGATC	326	21	B	9	97	norm_1pM	1pM	S3
GTTTCG	GCCAAT	7138	21	B	9	97	norm_10pM	10pM	S3
GTTTCG	TTAGGC	12126	21	B	9	97	S_RBD_IgG		S3
CGTACG	ACAGTG	99596	22	B	10	98	norm_100pM	100pM	S3
CGTACG	CAGATC	350	22	B	10	98	norm_1pM	1pM	S3
CGTACG	GCCAAT	7722	22	B	10	98	norm_10pM	10pM	S3
CGTACG	TTAGGC	5498	22	B	10	98	S_RBD_IgG		S3
TAGCTT	ACAGTG	147655	10	A	10	98	norm_100pM	100pM	S3
TAGCTT	CAGATC	519	10	A	10	98	norm_1pM	1pM	S3
TAGCTT	GCCAAT	11716	10	A	10	98	norm_10pM	10pM	S3
TAGCTT	TTAGGC	6621	10	A	10	98	S_RBD_IgG		S3
GAGTGG	ACAGTG	120053	23	B	11	99	norm_100pM	100pM	S3
GAGTGG	CAGATC	454	23	B	11	99	norm_1pM	1pM	S3
GAGTGG	GCCAAT	9389	23	B	11	99	norm_10pM	10pM	S3
GAGTGG	TTAGGC	5033	23	B	11	99	S_RBD_IgG		S3
GGCTAC	ACAGTG	138667	11	A	11	99	norm_100pM	100pM	S3
GGCTAC	CAGATC	467	11	A	11	99	norm_1pM	1pM	S3
GGCTAC	GCCAAT	10840	11	A	11	99	norm_10pM	10pM	S3
GGCTAC	TTAGGC	5943	11	A	11	99	S_RBD_IgG		S3
CTTGTA	ACAGTG	199135	12	A	12	100	norm_100pM	100pM	S3
CTTGTA	CAGATC	705	12	A	12	100	norm_1pM	1pM	S3
CTTGTA	GCCAAT	15547	12	A	12	100	norm_10pM	10pM	S3
CTTGTA	TTAGGC	13358	12	A	12	100	S_RBD_IgG		S3
GGTAGC	ACAGTG	140154	24	B	12	100	norm_100pM	100pM	S3
GGTAGC	CAGATC	476	24	B	12	100	norm_1pM	1pM	S3
GGTAGC	GCCAAT	10878	24	B	12	100	norm_10pM	10pM	S3
GGTAGC	TTAGGC	9389	24	B	12	100	S_RBD_IgG		S3
ACTGAT	ACAGTG	156422	25	C	1	101	norm_100pM	100pM	S3
ACTGAT	CAGATC	586	25	C	1	101	norm_1pM	1pM	S3
ACTGAT	GCCAAT	12334	25	C	1	101	norm_10pM	10pM	S3
ACTGAT	TTAGGC	8758	25	C	1	101	S_RBD_IgG		S3
CGGAAT	ACAGTG	157690	37	D	1	101	norm_100pM	100pM	S3
CGGAAT	CAGATC	537	37	D	1	101	norm_1pM	1pM	S3
CGGAAT	GCCAAT	12415	37	D	1	101	norm_10pM	10pM	S3
CGGAAT	TTAGGC	8451	37	D	1	101	S_RBD_IgG		S3
ATGAGC	ACAGTG	138649	26	C	2	102	norm_100pM	100pM	S3
ATGAGC	CAGATC	475	26	C	2	102	norm_1pM	1pM	S3
ATGAGC	GCCAAT	11014	26	C	2	102	norm_10pM	10pM	S3
ATGAGC	TTAGGC	7378	26	C	2	102	S_RBD_IgG		S3
CTAGCT	ACAGTG	169887	38	D	2	102	norm_100pM	100pM	S3
CTAGCT	CAGATC	587	38	D	2	102	norm_1pM	1pM	S3
CTAGCT	GCCAAT	13314	38	D	2	102	norm_10pM	10pM	S3
CTAGCT	TTAGGC	9242	38	D	2	102	S_RBD_IgG		S3
ATTCCT	ACAGTG	142026	27	C	3	103	norm_100pM	100pM	S3
ATTCCT	CAGATC	484	27	C	3	103	norm_1pM	1pM	S3
ATTCCT	GCCAAT	11024	27	C	3	103	norm_10pM	10pM	S3
ATTCCT	TTAGGC	9520	27	C	3	103	S_RBD_IgG		S3
CTATAC	ACAGTG	152085	39	D	3	103	norm_100pM	100pM	S3
CTATAC	CAGATC	555	39	D	3	103	norm_1pM	1pM	S3
CTATAC	GCCAAT	11821	39	D	3	103	norm_10pM	10pM	S3
CTATAC	TTAGGC	9146	39	D	3	103	S_RBD_IgG		S3
CAAAAG	ACAGTG	147882	28	C	4	104	norm_100pM	100pM	S3
CAAAAG	CAGATC	526	28	C	4	104	norm_1pM	1pM	S3
CAAAAG	GCCAAT	11542	28	C	4	104	norm_10pM	10pM	S3
CAAAAG	TTAGGC	21056	28	C	4	104	S_RBD_IgG		S3
CTCAGA	ACAGTG	133557	40	D	4	104	norm_100pM	100pM	S3
CTCAGA	CAGATC	482	40	D	4	104	norm_1pM	1pM	S3
CTCAGA	GCCAAT	10437	40	D	4	104	norm_10pM	10pM	S3
CTCAGA	TTAGGC	18532	40	D	4	104	S_RBD_IgG		S3
CAACTA	ACAGTG	158100	29	C	5	105	norm_100pM	100pM	S3
CAACTA	CAGATC	508	29	C	5	105	norm_1pM	1pM	S3
CAACTA	GCCAAT	12305	29	C	5	105	norm_10pM	10pM	S3
CAACTA	TTAGGC	6057	29	C	5	105	S_RBD_IgG		S3
GACGAC	ACAGTG	148873	41	D	5	105	norm_100pM	100pM	S3
GACGAC	CAGATC	531	41	D	5	105	norm_1pM	1pM	S3
GACGAC	GCCAAT	11633	41	D	5	105	norm_10pM	10pM	S3
GACGAC	TTAGGC	5635	41	D	5	105	S_RBD_IgG		S3
CACCGG	ACAGTG	152476	30	C	6	106	norm_100pM	100pM	S3
CACCGG	CAGATC	542	30	C	6	106	norm_1pM	1pM	S3
CACCGG	GCCAAT	11954	30	C	6	106	norm_10pM	10pM	S3
CACCGG	TTAGGC	9947	30	C	6	106	S_RBD_IgG		S3
TAATCG	ACAGTG	150633	42	D	6	106	norm_100pM	100pM	S3
TAATCG	CAGATC	551	42	D	6	106	norm_1pM	1pM	S3
TAATCG	GCCAAT	11586	42	D	6	106	norm_10pM	10pM	S3
TAATCG	TTAGGC	10162	42	D	6	106	S_RBD_IgG		S3
CACGAT	ACAGTG	117108	31	C	7	107	norm_100pM	100pM	S3
CACGAT	CAGATC	419	31	C	7	107	norm_1pM	1pM	S3
CACGAT	GCCAAT	9145	31	C	7	107	norm_10pM	10pM	S3
CACGAT	TTAGGC	11470	31	C	7	107	S_RBD_IgG		S3
TACAGC	ACAGTG	121847	43	D	7	107	norm_100pM	100pM	S3
TACAGC	CAGATC	381	43	D	7	107	norm_1pM	1pM	S3
TACAGC	GCCAAT	9538	43	D	7	107	norm_10pM	10pM	S3
TACAGC	TTAGGC	10267	43	D	7	107	S_RBD_IgG		S3
CACTCA	ACAGTG	111171	32	C	8	108	norm_100pM	100pM	S3
CACTCA	CAGATC	392	32	C	8	108	norm_1pM	1pM	S3
CACTCA	GCCAAT	8637	32	C	8	108	norm_10pM	10pM	S3
CACTCA	TTAGGC	17441	32	C	8	108	S_RBD_IgG		S3
TATAAT	ACAGTG	131541	44	D	8	108	norm_100pM	100pM	S3
TATAAT	CAGATC	476	44	D	8	108	norm_1pM	1pM	S3
TATAAT	GCCAAT	10391	44	D	8	108	norm_10pM	10pM	S3
TATAAT	TTAGGC	20931	44	D	8	108	S_RBD_IgG		S3
CAGGCG	ACAGTG	103978	33	C	9	109	norm_100pM	100pM	S3
CAGGCG	CAGATC	370	33	C	9	109	norm_1pM	1pM	S3
CAGGCG	GCCAAT	8267	33	C	9	109	norm_10pM	10pM	S3
CAGGCG	TTAGGC	14844	33	C	9	109	S_RBD_IgG		S3
TCATTC	ACAGTG	122439	45	D	9	109	norm_100pM	100pM	S3
TCATTC	CAGATC	418	45	D	9	109	norm_1pM	1pM	S3
TCATTC	GCCAAT	9406	45	D	9	109	norm_10pM	10pM	S3
TCATTC	TTAGGC	16857	45	D	9	109	S_RBD_IgG		S3
CATGGC	ACAGTG	108271	34	C	10	110	norm_100pM	100pM	S3
CATGGC	CAGATC	372	34	C	10	110	norm_1pM	1pM	S3
CATGGC	GCCAAT	8484	34	C	10	110	norm_10pM	10pM	S3
CATGGC	TTAGGC	3548	34	C	10	110	S_RBD_IgG		S3
TCCCGA	ACAGTG	99085	46	D	10	110	norm_100pM	100pM	S3
TCCCGA	CAGATC	336	46	D	10	110	norm_1pM	1pM	S3
TCCCGA	GCCAAT	7744	46	D	10	110	norm_10pM	10pM	S3
TCCCGA	TTAGGC	3343	46	D	10	110	S_RBD_IgG		S3
CATTTT	ACAGTG	133036	35	C	11	111	norm_100pM	100pM	S3
CATTTT	CAGATC	473	35	C	11	111	norm_1pM	1pM	S3
CATTTT	GCCAAT	10485	35	C	11	111	norm_10pM	10pM	S3
CATTTT	TTAGGC	17118	35	C	11	111	S_RBD_IgG		S3
TCGAAG	ACAGTG	155340	47	D	11	111	norm_100pM	100pM	S3
TCGAAG	CAGATC	551	47	D	11	111	norm_1pM	1pM	S3
TCGAAG	GCCAAT	12318	47	D	11	111	norm_10pM	10pM	S3
TCGAAG	TTAGGC	20593	47	D	11	111	S_RBD_IgG		S3
CCAACA	ACAGTG	113495	36	C	12	112	norm_100pM	100pM	S3
CCAACA	CAGATC	437	36	C	12	112	norm_1pM	1pM	S3
CCAACA	GCCAAT	8857	36	C	12	112	norm_10pM	10pM	S3
CCAACA	TTAGGC	7915	36	C	12	112	S_RBD_IgG		S3
TCGGCA	ACAGTG	141638	48	D	12	112	norm_100pM	100pM	S3
TCGGCA	CAGATC	455	48	D	12	112	norm_1pM	1pM	S3
TCGGCA	GCCAAT	11038	48	D	12	112	norm_10pM	10pM	S3
TCGGCA	TTAGGC	10124	48	D	12	112	S_RBD_IgG		S3
AACGGA	ACAGTG	175192	61	F	1	113	norm_100pM	100pM	S3
AACGGA	CAGATC	594	61	F	1	113	norm_1pM	1pM	S3
AACGGA	GCCAAT	13917	61	F	1	113	norm_10pM	10pM	S3
AACGGA	TTAGGC	10896	61	F	1	113	S_RBD_IgG		S3
GTACTT	ACAGTG	162673	49	E	1	113	norm_100pM	100pM	S3
GTACTT	CAGATC	608	49	E	1	113	norm_1pM	1pM	S3
GTACTT	GCCAAT	12739	49	E	1	113	norm_10pM	10pM	S3
GTACTT	TTAGGC	8965	49	E	1	113	S_RBD_IgG		S3
ATGGCA	ACAGTG	179264	50	E	2	114	norm_100pM	100pM	S3
ATGGCA	CAGATC	638	50	E	2	114	norm_1pM	1pM	S3
ATGGCA	GCCAAT	14029	50	E	2	114	norm_10pM	10pM	S3
ATGGCA	TTAGGC	7593	50	E	2	114	S_RBD_IgG		S3
GACGAT	ACAGTG	173348	62	F	2	114	norm_100pM	100pM	S3
GACGAT	CAGATC	568	62	F	2	114	norm_1pM	1pM	S3
GACGAT	GCCAAT	13533	62	F	2	114	norm_10pM	10pM	S3
GACGAT	TTAGGC	8531	62	F	2	114	S_RBD_IgG		S3
AAGGAG	ACAGTG	152194	51	E	3	115	norm_100pM	100pM	S3
AAGGAG	CAGATC	545	51	E	3	115	norm_1pM	1pM	S3
AAGGAG	GCCAAT	11924	51	E	3	115	norm_10pM	10pM	S3
AAGGAG	TTAGGC	3452	51	E	3	115	S_RBD_IgG		S3
TTGCGG	ACAGTG	148818	63	F	3	115	norm_100pM	100pM	S3
TTGCGG	CAGATC	525	63	F	3	115	norm_1pM	1pM	S3
TTGCGG	GCCAAT	11617	63	F	3	115	norm_10pM	10pM	S3
TTGCGG	TTAGGC	3530	63	F	3	115	S_RBD_IgG		S3
CAAGTT	ACAGTG	154982	64	F	4	116	norm_100pM	100pM	S3
CAAGTT	CAGATC	514	64	F	4	116	norm_1pM	1pM	S3
CAAGTT	GCCAAT	12078	64	F	4	116	norm_10pM	10pM	S3
CAAGTT	TTAGGC	17790	64	F	4	116	S_RBD_IgG		S3
CTATCT	ACAGTG	136756	52	E	4	116	norm_100pM	100pM	S3
CTATCT	CAGATC	522	52	E	4	116	norm_1pM	1pM	S3
CTATCT	GCCAAT	10486	52	E	4	116	norm_10pM	10pM	S3
CTATCT	TTAGGC	13730	52	E	4	116	S_RBD_IgG		S3
TACCTT	ACAGTG	145405	65	F	5	117	norm_100pM	100pM	S3
TACCTT	CAGATC	471	65	F	5	117	norm_1pM	1pM	S3
TACCTT	GCCAAT	11144	65	F	5	117	norm_10pM	10pM	S3
TACCTT	TTAGGC	12322	65	F	5	117	S_RBD_IgG		S3
TATATC	ACAGTG	160063	53	E	5	117	norm_100pM	100pM	S3
TATATC	CAGATC	572	53	E	5	117	norm_1pM	1pM	S3
TATATC	GCCAAT	12618	53	E	5	117	norm_10pM	10pM	S3
TATATC	TTAGGC	12337	53	E	5	117	S_RBD_IgG		S3
GAGCGC	ACAGTG	111239	66	F	6	118	norm_100pM	100pM	S3
GAGCGC	CAGATC	352	66	F	6	118	norm_1pM	1pM	S3
GAGCGC	GCCAAT	8744	66	F	6	118	norm_10pM	10pM	S3
GAGCGC	TTAGGC	8558	66	F	6	118	S_RBD_IgG		S3
TATTAT	ACAGTG	161835	54	E	6	118	norm_100pM	100pM	S3
TATTAT	CAGATC	578	54	E	6	118	norm_1pM	1pM	S3
TATTAT	GCCAAT	12332	54	E	6	118	norm_10pM	10pM	S3
TATTAT	TTAGGC	10783	54	E	6	118	S_RBD_IgG		S3
ACGAGG	ACAGTG	123175	67	F	7	119	norm_100pM	100pM	S3
ACGAGG	CAGATC	443	67	F	7	119	norm_1pM	1pM	S3
ACGAGG	GCCAAT	9619	67	F	7	119	norm_10pM	10pM	S3
ACGAGG	TTAGGC	5066	67	F	7	119	S_RBD_IgG		S3
AGCACC	ACAGTG	128403	55	E	7	119	norm_100pM	100pM	S3
AGCACC	CAGATC	448	55	E	7	119	norm_1pM	1pM	S3
AGCACC	GCCAAT	9985	55	E	7	119	norm_10pM	10pM	S3
AGCACC	TTAGGC	5090	55	E	7	119	S_RBD_IgG		S3
AATCGT	ACAGTG	112962	68	F	8	120	norm_100pM	100pM	S3
AATCGT	CAGATC	358	68	F	8	120	norm_1pM	1pM	S3
AATCGT	GCCAAT	8764	68	F	8	120	norm_10pM	10pM	S3
AATCGT	TTAGGC	6095	68	F	8	120	S_RBD_IgG		S3
TCCACA	ACAGTG	110673	56	E	8	120	norm_100pM	100pM	S3
TCCACA	CAGATC	438	56	E	8	120	norm_1pM	1pM	S3
TCCACA	GCCAAT	8494	56	E	8	120	norm_10pM	10pM	S3
TCCACA	TTAGGC	4971	56	E	8	120	S_RBD_IgG		S3
GAGTCT	ACAGTG	114919	69	F	9	121	norm_100pM	100pM	S3
GAGTCT	CAGATC	415	69	F	9	121	norm_1pM	1pM	S3
GAGTCT	GCCAAT	9029	69	F	9	121	norm_10pM	10pM	S3
GAGTCT	TTAGGC	6627	69	F	9	121	S_RBD_IgG		S3
TTCTCG	ACAGTG	143212	57	E	9	121	norm_100pM	100pM	S3
TTCTCG	CAGATC	498	57	E	9	121	norm_1pM	1pM	S3
TTCTCG	GCCAAT	11225	57	E	9	121	norm_10pM	10pM	S3
TTCTCG	TTAGGC	8339	57	E	9	121	S_RBD_IgG		S3
AGACCA	ACAGTG	117262	70	F	10	122	norm_100pM	100pM	S3
AGACCA	CAGATC	394	70	F	10	122	norm_1pM	1pM	S3
AGACCA	GCCAAT	9220	70	F	10	122	norm_10pM	10pM	S3
AGACCA	TTAGGC	7313	70	F	10	122	S_RBD_IgG		S3
TCCTGC	ACAGTG	96270	58	E	10	122	norm_100pM	100pM	S3
TCCTGC	CAGATC	323	58	E	10	122	norm_1pM	1pM	S3
TCCTGC	GCCAAT	7462	58	E	10	122	norm_10pM	10pM	S3
TCCTGC	TTAGGC	5278	58	E	10	122	S_RBD_IgG		S3
AATTCC	ACAGTG	143326	71	F	11	123	norm_100pM	100pM	S3
AATTCC	CAGATC	496	71	F	11	123	norm_1pM	1pM	S3
AATTCC	GCCAAT	11124	71	F	11	123	norm_10pM	10pM	S3
AATTCC	TTAGGC	18770	71	F	11	123	S_RBD_IgG		S3
CGCGGC	ACAGTG	121500	59	E	11	123	norm_100pM	100pM	S3
CGCGGC	CAGATC	401	59	E	11	123	norm_1pM	1pM	S3
CGCGGC	GCCAAT	9280	59	E	11	123	norm_10pM	10pM	S3
CGCGGC	TTAGGC	14626	59	E	11	123	S_RBD_IgG		S3
AGATGT	ACAGTG	133638	72	F	12	124	norm_100pM	100pM	S3
AGATGT	CAGATC	466	72	F	12	124	norm_1pM	1pM	S3
AGATGT	GCCAAT	10521	72	F	12	124	norm_10pM	10pM	S3
AGATGT	TTAGGC	23388	72	F	12	124	S_RBD_IgG		S3
TGCGCT	ACAGTG	136330	60	E	12	124	norm_100pM	100pM	S3
TGCGCT	CAGATC	456	60	E	12	124	norm_1pM	1pM	S3
TGCGCT	GCCAAT	10515	60	E	12	124	norm_10pM	10pM	S3
TGCGCT	TTAGGC	22676	60	E	12	124	S_RBD_IgG		S3
CTAAGG	ACAGTG	172346	85	H	1	125	norm_100pM	100pM	S3
CTAAGG	CAGATC	616	85	H	1	125	norm_1pM	1pM	S3
CTAAGG	GCCAAT	13346	85	H	1	125	norm_10pM	10pM	S3
CTAAGG	TTAGGC	7215	85	H	1	125	S_RBD_IgG		S3
GGAGAA	ACAGTG	189022	73	G	1	125	norm_100pM	100pM	S3
GGAGAA	CAGATC	684	73	G	1	125	norm_1pM	1pM	S3
GGAGAA	GCCAAT	14894	73	G	1	125	norm_10pM	10pM	S3
GGAGAA	TTAGGC	7476	73	G	1	125	S_RBD_IgG		S3
ATAGAT	ACAGTG	113517	74	G	2	126	norm_100pM	100pM	S3
ATAGAT	CAGATC	397	74	G	2	126	norm_1pM	1pM	S3
ATAGAT	GCCAAT	8803	74	G	2	126	norm_10pM	10pM	S3
ATAGAT	TTAGGC	7386	74	G	2	126	S_RBD_IgG		S3
ATCCAA	ACAGTG	220425	86	H	2	126	norm_100pM	100pM	S3
ATCCAA	CAGATC	756	86	H	2	126	norm_1pM	1pM	S3
ATCCAA	GCCAAT	17373	86	H	2	126	norm_10pM	10pM	S3
ATCCAA	TTAGGC	14459	86	H	2	126	S_RBD_IgG		S3
GTGAGA	ACAGTG	189057	87	H	3	127	norm_100pM	100pM	S3
GTGAGA	CAGATC	614	87	H	3	127	norm_1pM	1pM	S3
GTGAGA	GCCAAT	14723	87	H	3	127	norm_10pM	10pM	S3
GTGAGA	TTAGGC	19597	87	H	3	127	S_RBD_IgG		S3
TATGCA	ACAGTG	175123	75	G	3	127	norm_100pM	100pM	S3
TATGCA	CAGATC	634	75	G	3	127	norm_1pM	1pM	S3
TATGCA	GCCAAT	13721	75	G	3	127	norm_10pM	10pM	S3
TATGCA	TTAGGC	15534	75	G	3	127	S_RBD_IgG		S3
CCTATT	ACAGTG	152745	76	G	4	128	norm_100pM	100pM	S3
CCTATT	CAGATC	511	76	G	4	128	norm_1pM	1pM	S3
CCTATT	GCCAAT	11881	76	G	4	128	norm_10pM	10pM	S3
CCTATT	TTAGGC	6981	76	G	4	128	S_RBD_IgG		S3
TAAGAC	ACAGTG	189529	88	H	4	128	norm_100pM	100pM	S3
TAAGAC	CAGATC	647	88	H	4	128	norm_1pM	1pM	S3
TAAGAC	GCCAAT	14767	88	H	4	128	norm_10pM	10pM	S3
TAAGAC	TTAGGC	10054	88	H	4	128	S_RBD_IgG		S3
CGTTAG	ACAGTG	141163	89	H	5	129	norm_100pM	100pM	S3
CGTTAG	CAGATC	468	89	H	5	129	norm_1pM	1pM	S3
CGTTAG	GCCAAT	10891	89	H	5	129	norm_10pM	10pM	S3
CGTTAG	TTAGGC	3896	89	H	5	129	S_RBD_IgG		S3
TAACCG	ACAGTG	139838	77	G	5	129	norm_100pM	100pM	S3
TAACCG	CAGATC	470	77	G	5	129	norm_1pM	1pM	S3
TAACCG	GCCAAT	10759	77	G	5	129	norm_10pM	10pM	S3
TAACCG	TTAGGC	3811	77	G	5	129	S_RBD_IgG		S3
AGTCTC	ACAGTG	149378	78	G	6	130	norm_100pM	100pM	S3
AGTCTC	CAGATC	540	78	G	6	130	norm_1pM	1pM	S3
AGTCTC	GCCAAT	11760	78	G	6	130	norm_10pM	10pM	S3
AGTCTC	TTAGGC	10549	78	G	6	130	S_RBD_IgG		S3
GTGTAT	ACAGTG	179087	90	H	6	130	norm_100pM	100pM	S3
GTGTAT	CAGATC	607	90	H	6	130	norm_1pM	1pM	S3
GTGTAT	GCCAAT	14097	90	H	6	130	norm_10pM	10pM	S3
GTGTAT	TTAGGC	13638	90	H	6	130	S_RBD_IgG		S3
GAATGC	ACAGTG	153986	91	H	7	131	norm_100pM	100pM	S3
GAATGC	CAGATC	547	91	H	7	131	norm_1pM	1pM	S3
GAATGC	GCCAAT	11957	91	H	7	131	norm_10pM	10pM	S3
GAATGC	TTAGGC	26564	91	H	7	131	S_RBD_IgG		S3
TGGAGC	ACAGTG	143235	79	G	7	131	norm_100pM	100pM	S3
TGGAGC	CAGATC	479	79	G	7	131	norm_1pM	1pM	S3
TGGAGC	GCCAAT	11281	79	G	7	131	norm_10pM	10pM	S3
TGGAGC	TTAGGC	22635	79	G	7	131	S_RBD_IgG		S3
AGAGTA	ACAGTG	165432	92	H	8	132	norm_100pM	100pM	S3
AGAGTA	CAGATC	581	92	H	8	132	norm_1pM	1pM	S3
AGAGTA	GCCAAT	12889	92	H	8	132	norm_10pM	10pM	S3
AGAGTA	TTAGGC	12053	92	H	8	132	S_RBD_IgG		S3
CTGCAT	ACAGTG	142818	80	G	8	132	norm_100pM	100pM	S3
CTGCAT	CAGATC	463	80	G	8	132	norm_1pM	1pM	S3
CTGCAT	GCCAAT	11412	80	G	8	132	norm_10pM	10pM	S3
CTGCAT	TTAGGC	11301	80	G	8	132	S_RBD_IgG		S3
AGTCAA	ACAGTG	373891	13	B	1	133	norm_100pM	100pM	S4
AGTCAA	CAGATC	1328	13	B	1	133	norm_1pM	1pM	S4
AGTCAA	GCCAAT	28941	13	B	1	133	norm_10pM	10pM	S4
AGTCAA	TTAGGC	18853	13	B	1	133	S_RBD_IgG		S4
ATCACG	ACAGTG	218963	1	A	1	133	norm_100pM	100pM	S4
ATCACG	CAGATC	750	1	A	1	133	norm_1pM	1pM	S4
ATCACG	GCCAAT	16592	1	A	1	133	norm_10pM	10pM	S4
ATCACG	TTAGGC	10488	1	A	1	133	S_RBD_IgG		S4
AGTTCC	ACAGTG	256526	14	B	2	134	norm_100pM	100pM	S4
AGTTCC	CAGATC	899	14	B	2	134	norm_1pM	1pM	S4
AGTTCC	GCCAAT	19600	14	B	2	134	norm_10pM	10pM	S4
AGTTCC	TTAGGC	50990	14	B	2	134	S_RBD_IgG		S4
CGATGT	ACAGTG	280103	2	A	2	134	norm_100pM	100pM	S4
CGATGT	CAGATC	951	2	A	2	134	norm_1pM	1pM	S4
CGATGT	GCCAAT	21415	2	A	2	134	norm_10pM	10pM	S4
CGATGT	TTAGGC	52018	2	A	2	134	S_RBD_IgG		S4
ATGTCA	ACAGTG	210131	15	B	3	135	norm_100pM	100pM	S4
ATGTCA	CAGATC	761	15	B	3	135	norm_1pM	1pM	S4
ATGTCA	GCCAAT	16152	15	B	3	135	norm_10pM	10pM	S4
ATGTCA	TTAGGC	30214	15	B	3	135	S_RBD_IgG		S4
TTAGGC	ACAGTG	269971	3	A	3	135	norm_100pM	100pM	S4
TTAGGC	CAGATC	895	3	A	3	135	norm_1pM	1pM	S4
TTAGGC	GCCAAT	21074	3	A	3	135	norm_10pM	10pM	S4
TTAGGC	TTAGGC	40452	3	A	3	135	S_RBD_IgG		S4
CCGTCC	ACAGTG	252445	16	B	4	136	norm_100pM	100pM	S4
CCGTCC	CAGATC	891	16	B	4	136	norm_1pM	1pM	S4
CCGTCC	GCCAAT	19375	16	B	4	136	norm_10pM	10pM	S4
CCGTCC	TTAGGC	20034	16	B	4	136	S_RBD_IgG		S4
TGACCA	ACAGTG	236662	4	A	4	136	norm_100pM	100pM	S4
TGACCA	CAGATC	861	4	A	4	136	norm_1pM	1pM	S4
TGACCA	GCCAAT	18188	4	A	4	136	norm_10pM	10pM	S4
TGACCA	TTAGGC	16254	4	A	4	136	S_RBD_IgG		S4
ACAGTG	ACAGTG	232679	5	A	5	137	norm_100pM	100pM	S4
ACAGTG	CAGATC	794	5	A	5	137	norm_1pM	1pM	S4
ACAGTG	GCCAAT	17704	5	A	5	137	norm_10pM	10pM	S4
ACAGTG	TTAGGC	17336	5	A	5	137	S_RBD_IgG		S4
GTAGAG	ACAGTG	280426	17	B	5	137	norm_100pM	100pM	S4
GTAGAG	CAGATC	979	17	B	5	137	norm_1pM	1pM	S4
GTAGAG	GCCAAT	21557	17	B	5	137	norm_10pM	10pM	S4
GTAGAG	TTAGGC	25525	17	B	5	137	S_RBD_IgG		S4
GCCAAT	ACAGTG	182307	6	A	6	138	norm_100pM	100pM	S4
GCCAAT	CAGATC	584	6	A	6	138	norm_1pM	1pM	S4
GCCAAT	GCCAAT	14117	6	A	6	138	norm_10pM	10pM	S4
GCCAAT	TTAGGC	13949	6	A	6	138	S_RBD_IgG		S4
GTCCGC	ACAGTG	265764	18	B	6	138	norm_100pM	100pM	S4
GTCCGC	CAGATC	917	18	B	6	138	norm_1pM	1pM	S4
GTCCGC	GCCAAT	20277	18	B	6	138	norm_10pM	10pM	S4
GTCCGC	TTAGGC	24120	18	B	6	138	S_RBD_IgG		S4
CAGATC	ACAGTG	226446	7	A	7	139	norm_100pM	100pM	S4
CAGATC	CAGATC	748	7	A	7	139	norm_1pM	1pM	S4
CAGATC	GCCAAT	17343	7	A	7	139	norm_10pM	10pM	S4
CAGATC	TTAGGC	65197	7	A	7	139	S_RBD_IgG		S4
GTGAAA	ACAGTG	168810	19	B	7	139	norm_100pM	100pM	S4
GTGAAA	CAGATC	589	19	B	7	139	norm_1pM	1pM	S4
GTGAAA	GCCAAT	12790	19	B	7	139	norm_10pM	10pM	S4
GTGAAA	TTAGGC	53035	19	B	7	139	S_RBD_IgG		S4
ACTTGA	ACAGTG	262852	8	A	8	140	norm_100pM	100pM	S4
ACTTGA	CAGATC	903	8	A	8	140	norm_1pM	1pM	S4
ACTTGA	GCCAAT	20353	8	A	8	140	norm_10pM	10pM	S4
ACTTGA	TTAGGC	37684	8	A	8	140	S_RBD_IgG		S4
GTGGCC	ACAGTG	305667	20	B	8	140	norm_100pM	100pM	S4
GTGGCC	CAGATC	1075	20	B	8	140	norm_1pM	1pM	S4
GTGGCC	GCCAAT	23926	20	B	8	140	norm_10pM	10pM	S4
GTGGCC	TTAGGC	49280	20	B	8	140	S_RBD_IgG		S4
GATCAG	ACAGTG	203098	9	A	9	141	norm_100pM	100pM	S4
GATCAG	CAGATC	703	9	A	9	141	norm_1pM	1pM	S4
GATCAG	GCCAAT	15710	9	A	9	141	norm_10pM	10pM	S4
GATCAG	TTAGGC	35966	9	A	9	141	S_RBD_IgG		S4
GTTTCG	ACAGTG	288725	21	B	9	141	norm_100pM	100pM	S4
GTTTCG	CAGATC	1032	21	B	9	141	norm_1pM	1pM	S4
GTTTCG	GCCAAT	22254	21	B	9	141	norm_10pM	10pM	S4
GTTTCG	TTAGGC	60837	21	B	9	141	S_RBD_IgG		S4
CGTACG	ACAGTG	228701	22	B	10	142	norm_100pM	100pM	S4
CGTACG	CAGATC	786	22	B	10	142	norm_1pM	1pM	S4
CGTACG	GCCAAT	17543	22	B	10	142	norm_10pM	10pM	S4
CGTACG	TTAGGC	34731	22	B	10	142	S_RBD_IgG		S4
TAGCTT	ACAGTG	240270	10	A	10	142	norm_100pM	100pM	S4
TAGCTT	CAGATC	828	10	A	10	142	norm_1pM	1pM	S4
TAGCTT	GCCAAT	18747	10	A	10	142	norm_10pM	10pM	S4
TAGCTT	TTAGGC	33048	10	A	10	142	S_RBD_IgG		S4
GAGTGG	ACAGTG	180300	23	B	11	143	norm_100pM	100pM	S4
GAGTGG	CAGATC	624	23	B	11	143	norm_1pM	1pM	S4
GAGTGG	GCCAAT	13514	23	B	11	143	norm_10pM	10pM	S4
GAGTGG	TTAGGC	16738	23	B	11	143	S_RBD_IgG		S4
GGCTAC	ACAGTG	243950	11	A	11	143	norm_100pM	100pM	S4
GGCTAC	CAGATC	809	11	A	11	143	norm_1pM	1pM	S4
GGCTAC	GCCAAT	18968	11	A	11	143	norm_10pM	10pM	S4
GGCTAC	TTAGGC	22055	11	A	11	143	S_RBD_IgG		S4
CTTGTA	ACAGTG	343562	12	A	12	144	norm_100pM	100pM	S4
CTTGTA	CAGATC	1202	12	A	12	144	norm_1pM	1pM	S4
CTTGTA	GCCAAT	26905	12	A	12	144	norm_10pM	10pM	S4
CTTGTA	TTAGGC	45115	12	A	12	144	S_RBD_IgG		S4
GGTAGC	ACAGTG	220476	24	B	12	144	norm_100pM	100pM	S4
GGTAGC	CAGATC	755	24	B	12	144	norm_1pM	1pM	S4
GGTAGC	GCCAAT	17273	24	B	12	144	norm_10pM	10pM	S4
GGTAGC	TTAGGC	36447	24	B	12	144	S_RBD_IgG		S4
ACTGAT	ACAGTG	216083	25	C	1	145	norm_100pM	100pM	S4
ACTGAT	CAGATC	743	25	C	1	145	norm_1pM	1pM	S4
ACTGAT	GCCAAT	16534	25	C	1	145	norm_10pM	10pM	S4
ACTGAT	TTAGGC	14035	25	C	1	145	S_RBD_IgG		S4
CGGAAT	ACAGTG	211324	37	D	1	145	norm_100pM	100pM	S4
CGGAAT	CAGATC	725	37	D	1	145	norm_1pM	1pM	S4
CGGAAT	GCCAAT	16183	37	D	1	145	norm_10pM	10pM	S4
CGGAAT	TTAGGC	14300	37	D	1	145	S_RBD_IgG		S4
ATGAGC	ACAGTG	277236	26	C	2	146	norm_100pM	100pM	S4
ATGAGC	CAGATC	1020	26	C	2	146	norm_1pM	1pM	S4
ATGAGC	GCCAAT	21589	26	C	2	146	norm_10pM	10pM	S4
ATGAGC	TTAGGC	18368	26	C	2	146	S_RBD_IgG		S4
CTAGCT	ACAGTG	227697	38	D	2	146	norm_100pM	100pM	S4
CTAGCT	CAGATC	825	38	D	2	146	norm_1pM	1pM	S4
CTAGCT	GCCAAT	17730	38	D	2	146	norm_10pM	10pM	S4
CTAGCT	TTAGGC	17376	38	D	2	146	S_RBD_IgG		S4
ATTCCT	ACAGTG	208625	27	C	3	147	norm_100pM	100pM	S4
ATTCCT	CAGATC	708	27	C	3	147	norm_1pM	1pM	S4
ATTCCT	GCCAAT	16052	27	C	3	147	norm_10pM	10pM	S4
ATTCCT	TTAGGC	20111	27	C	3	147	S_RBD_IgG		S4
CTATAC	ACAGTG	256322	39	D	3	147	norm_100pM	100pM	S4
CTATAC	CAGATC	887	39	D	3	147	norm_1pM	1pM	S4
CTATAC	GCCAAT	19352	39	D	3	147	norm_10pM	10pM	S4
CTATAC	TTAGGC	26304	39	D	3	147	S_RBD_IgG		S4
CAAAAG	ACAGTG	242813	28	C	4	148	norm_100pM	100pM	S4
CAAAAG	CAGATC	877	28	C	4	148	norm_1pM	1pM	S4
CAAAAG	GCCAAT	18545	28	C	4	148	norm_10pM	10pM	S4
CAAAAG	TTAGGC	15577	28	C	4	148	S_RBD_IgG		S4
CTCAGA	ACAGTG	232470	40	D	4	148	norm_100pM	100pM	S4
CTCAGA	CAGATC	783	40	D	4	148	norm_1pM	1pM	S4
CTCAGA	GCCAAT	17667	40	D	4	148	norm_10pM	10pM	S4
CTCAGA	TTAGGC	17510	40	D	4	148	S_RBD_IgG		S4
CAACTA	ACAGTG	246810	29	C	5	149	norm_100pM	100pM	S4
CAACTA	CAGATC	821	29	C	5	149	norm_1pM	1pM	S4
CAACTA	GCCAAT	18765	29	C	5	149	norm_10pM	10pM	S4
CAACTA	TTAGGC	20301	29	C	5	149	S_RBD_IgG		S4
GACGAC	ACAGTG	236198	41	D	5	149	norm_100pM	100pM	S4
GACGAC	CAGATC	823	41	D	5	149	norm_1pM	1pM	S4
GACGAC	GCCAAT	18334	41	D	5	149	norm_10pM	10pM	S4
GACGAC	TTAGGC	20910	41	D	5	149	S_RBD_IgG		S4
CACCGG	ACAGTG	246454	30	C	6	150	norm_100pM	100pM	S4
CACCGG	CAGATC	798	30	C	6	150	norm_1pM	1pM	S4
CACCGG	GCCAAT	19024	30	C	6	150	norm_10pM	10pM	S4
CACCGG	TTAGGC	30316	30	C	6	150	S_RBD_IgG		S4
TAATCG	ACAGTG	180248	42	D	6	150	norm_100pM	100pM	S4
TAATCG	CAGATC	590	42	D	6	150	norm_1pM	1pM	S4
TAATCG	GCCAAT	13700	42	D	6	150	norm_10pM	10pM	S4
TAATCG	TTAGGC	25066	42	D	6	150	S_RBD_IgG		S4
CACGAT	ACAGTG	178080	31	C	7	151	norm_100pM	100pM	S4
CACGAT	CAGATC	650	31	C	7	151	norm_1pM	1pM	S4
CACGAT	GCCAAT	13667	31	C	7	151	norm_10pM	10pM	S4
CACGAT	TTAGGC	29728	31	C	7	151	S_RBD_IgG		S4
TACAGC	ACAGTG	181755	43	D	7	151	norm_100pM	100pM	S4
TACAGC	CAGATC	650	43	D	7	151	norm_1pM	1pM	S4
TACAGC	GCCAAT	14135	43	D	7	151	norm_10pM	10pM	S4
TACAGC	TTAGGC	32980	43	D	7	151	S_RBD_IgG		S4
CACTCA	ACAGTG	250000	32	C	8	152	norm_100pM	100pM	S4
CACTCA	CAGATC	886	32	C	8	152	norm_1pM	1pM	S4
CACTCA	GCCAAT	19116	32	C	8	152	norm_10pM	10pM	S4
CACTCA	TTAGGC	11455	32	C	8	152	S_RBD_IgG		S4
TATAAT	ACAGTG	217803	44	D	8	152	norm_100pM	100pM	S4
TATAAT	CAGATC	745	44	D	8	152	norm_1pM	1pM	S4
TATAAT	GCCAAT	16884	44	D	8	152	norm_10pM	10pM	S4
TATAAT	TTAGGC	10523	44	D	8	152	S_RBD_IgG		S4
CAGGCG	ACAGTG	179434	33	C	9	153	norm_100pM	100pM	S4
CAGGCG	CAGATC	611	33	C	9	153	norm_1pM	1pM	S4
CAGGCG	GCCAAT	13870	33	C	9	153	norm_10pM	10pM	S4
CAGGCG	TTAGGC	36961	33	C	9	153	S_RBD_IgG		S4
TCATTC	ACAGTG	185030	45	D	9	153	norm_100pM	100pM	S4
TCATTC	CAGATC	575	45	D	9	153	norm_1pM	1pM	S4
TCATTC	GCCAAT	14214	45	D	9	153	norm_10pM	10pM	S4
TCATTC	TTAGGC	44907	45	D	9	153	S_RBD_IgG		S4
CATGGC	ACAGTG	213457	34	C	10	154	norm_100pM	100pM	S4
CATGGC	CAGATC	721	34	C	10	154	norm_1pM	1pM	S4
CATGGC	GCCAAT	16354	34	C	10	154	norm_10pM	10pM	S4
CATGGC	TTAGGC	13253	34	C	10	154	S_RBD_IgG		S4
TCCCGA	ACAGTG	205716	46	D	10	154	norm_100pM	100pM	S4
TCCCGA	CAGATC	738	46	D	10	154	norm_1pM	1pM	S4
TCCCGA	GCCAAT	15807	46	D	10	154	norm_10pM	10pM	S4
TCCCGA	TTAGGC	14735	46	D	10	154	S_RBD_IgG		S4
CATTTT	ACAGTG	232055	35	C	11	155	norm_100pM	100pM	S4
CATTTT	CAGATC	739	35	C	11	155	norm_1pM	1pM	S4
CATTTT	GCCAAT	17995	35	C	11	155	norm_10pM	10pM	S4
CATTTT	TTAGGC	14679	35	C	11	155	S_RBD_IgG		S4
TCGAAG	ACAGTG	184583	47	D	11	155	norm_100pM	100pM	S4
TCGAAG	CAGATC	627	47	D	11	155	norm_1pM	1pM	S4
TCGAAG	GCCAAT	14018	47	D	11	155	norm_10pM	10pM	S4
TCGAAG	TTAGGC	12819	47	D	11	155	S_RBD_IgG		S4
CCAACA	ACAGTG	211994	36	C	12	156	norm_100pM	100pM	S4
CCAACA	CAGATC	716	36	C	12	156	norm_1pM	1pM	S4
CCAACA	GCCAAT	16081	36	C	12	156	norm_10pM	10pM	S4
CCAACA	TTAGGC	18037	36	C	12	156	S_RBD_IgG		S4
TCGGCA	ACAGTG	173778	48	D	12	156	norm_100pM	100pM	S4
TCGGCA	CAGATC	557	48	D	12	156	norm_1pM	1pM	S4
TCGGCA	GCCAAT	13584	48	D	12	156	norm_10pM	10pM	S4
TCGGCA	TTAGGC	15102	48	D	12	156	S_RBD_IgG		S4
AACGGA	ACAGTG	245293	61	F	1	157	norm_100pM	100pM	S4
AACGGA	CAGATC	853	61	F	1	157	norm_1pM	1pM	S4
AACGGA	GCCAAT	18865	61	F	1	157	norm_10pM	10pM	S4
AACGGA	TTAGGC	7657	61	F	1	157	S_RBD_IgG		S4
GTACTT	ACAGTG	230629	49	E	1	157	norm_100pM	100pM	S4
GTACTT	CAGATC	810	49	E	1	157	norm_1pM	1pM	S4
GTACTT	GCCAAT	17602	49	E	1	157	norm_10pM	10pM	S4
GTACTT	TTAGGC	6907	49	E	1	157	S_RBD_IgG		S4
ATGGCA	ACAGTG	399929	50	E	2	158	norm_100pM	100pM	S4
ATGGCA	CAGATC	1362	50	E	2	158	norm_1pM	1pM	S4
ATGGCA	GCCAAT	31207	50	E	2	158	norm_10pM	10pM	S4
ATGGCA	TTAGGC	27272	50	E	2	158	S_RBD_IgG		S4
GACGAT	ACAGTG	236612	62	F	2	158	norm_100pM	100pM	S4
GACGAT	CAGATC	780	62	F	2	158	norm_1pM	1pM	S4
GACGAT	GCCAAT	18141	62	F	2	158	norm_10pM	10pM	S4
GACGAT	TTAGGC	15733	62	F	2	158	S_RBD_IgG		S4
AAGGAG	ACAGTG	219624	51	E	3	159	norm_100pM	100pM	S4
AAGGAG	CAGATC	770	51	E	3	159	norm_1pM	1pM	S4
AAGGAG	GCCAAT	16872	51	E	3	159	norm_10pM	10pM	S4
AAGGAG	TTAGGC	27131	51	E	3	159	S_RBD_IgG		S4
TTGCGG	ACAGTG	220751	63	F	3	159	norm_100pM	100pM	S4
TTGCGG	CAGATC	711	63	F	3	159	norm_1pM	1pM	S4
TTGCGG	GCCAAT	16673	63	F	3	159	norm_10pM	10pM	S4
TTGCGG	TTAGGC	26723	63	F	3	159	S_RBD_IgG		S4
CAAGTT	ACAGTG	250964	64	F	4	160	norm_100pM	100pM	S4
CAAGTT	CAGATC	876	64	F	4	160	norm_1pM	1pM	S4
CAAGTT	GCCAAT	19259	64	F	4	160	norm_10pM	10pM	S4
CAAGTT	TTAGGC	68607	64	F	4	160	S_RBD_IgG		S4
CTATCT	ACAGTG	243944	52	E	4	160	norm_100pM	100pM	S4
CTATCT	CAGATC	876	52	E	4	160	norm_1pM	1pM	S4
CTATCT	GCCAAT	18777	52	E	4	160	norm_10pM	10pM	S4
CTATCT	TTAGGC	67138	52	E	4	160	S_RBD_IgG		S4
TACCTT	ACAGTG	263387	65	F	5	161	norm_100pM	100pM	S4
TACCTT	CAGATC	884	65	F	5	161	norm_1pM	1pM	S4
TACCTT	GCCAAT	20217	65	F	5	161	norm_10pM	10pM	S4
TACCTT	TTAGGC	62164	65	F	5	161	S_RBD_IgG		S4
TATATC	ACAGTG	251069	53	E	5	161	norm_100pM	100pM	S4
TATATC	CAGATC	850	53	E	5	161	norm_1pM	1pM	S4
TATATC	GCCAAT	19219	53	E	5	161	norm_10pM	10pM	S4
TATATC	TTAGGC	62092	53	E	5	161	S_RBD_IgG		S4
GAGCGC	ACAGTG	174808	66	F	6	162	norm_100pM	100pM	S4
GAGCGC	CAGATC	608	66	F	6	162	norm_1pM	1pM	S4
GAGCGC	GCCAAT	13291	66	F	6	162	norm_10pM	10pM	S4
GAGCGC	TTAGGC	27163	66	F	6	162	S_RBD_IgG		S4
TATTAT	ACAGTG	199664	54	E	6	162	norm_100pM	100pM	S4
TATTAT	CAGATC	713	54	E	6	162	norm_1pM	1pM	S4
TATTAT	GCCAAT	15389	54	E	6	162	norm_10pM	10pM	S4
TATTAT	TTAGGC	28405	54	E	6	162	S_RBD_IgG		S4
ACGAGG	ACAGTG	225860	67	F	7	163	norm_100pM	100pM	S4
ACGAGG	CAGATC	753	67	F	7	163	norm_1pM	1pM	S4
ACGAGG	GCCAAT	17338	67	F	7	163	norm_10pM	10pM	S4
ACGAGG	TTAGGC	34414	67	F	7	163	S_RBD_IgG		S4
AGCACC	ACAGTG	290648	55	E	7	163	norm_100pM	100pM	S4
AGCACC	CAGATC	1037	55	E	7	163	norm_1pM	1pM	S4
AGCACC	GCCAAT	22093	55	E	7	163	norm_10pM	10pM	S4
AGCACC	TTAGGC	42738	55	E	7	163	S_RBD_IgG		S4
AATCGT	ACAGTG	201182	68	F	8	164	norm_100pM	100pM	S4
AATCGT	CAGATC	667	68	F	8	164	norm_1pM	1pM	S4
AATCGT	GCCAAT	15462	68	F	8	164	norm_10pM	10pM	S4
AATCGT	TTAGGC	9318	68	F	8	164	S_RBD_IgG		S4
TCCACA	ACAGTG	142712	56	E	8	164	norm_100pM	100pM	S4
TCCACA	CAGATC	491	56	E	8	164	norm_1pM	1pM	S4
TCCACA	GCCAAT	10840	56	E	8	164	norm_10pM	10pM	S4
TCCACA	TTAGGC	6259	56	E	8	164	S_RBD_IgG		S4
GAGTCT	ACAGTG	202194	69	F	9	165	norm_100pM	100pM	S4
GAGTCT	CAGATC	718	69	F	9	165	norm_1pM	1pM	S4
GAGTCT	GCCAAT	15788	69	F	9	165	norm_10pM	10pM	S4
GAGTCT	TTAGGC	14735	69	F	9	165	S_RBD_IgG		S4
TTCTCG	ACAGTG	225040	57	E	9	165	norm_100pM	100pM	S4
TTCTCG	CAGATC	783	57	E	9	165	norm_1pM	1pM	S4
TTCTCG	GCCAAT	17377	57	E	9	165	norm_10pM	10pM	S4
TTCTCG	TTAGGC	16947	57	E	9	165	S_RBD_IgG		S4
AGACCA	ACAGTG	253888	70	F	10	166	norm_100pM	100pM	S4
AGACCA	CAGATC	808	70	F	10	166	norm_1pM	1pM	S4
AGACCA	GCCAAT	19498	70	F	10	166	norm_10pM	10pM	S4
AGACCA	TTAGGC	20244	70	F	10	166	S_RBD_IgG		S4
TCCTGC	ACAGTG	247231	58	E	10	166	norm_100pM	100pM	S4
TCCTGC	CAGATC	905	58	E	10	166	norm_1pM	1pM	S4
TCCTGC	GCCAAT	18887	58	E	10	166	norm_10pM	10pM	S4
TCCTGC	TTAGGC	19378	58	E	10	166	S_RBD_IgG		S4
AATTCC	ACAGTG	159063	71	F	11	167	norm_100pM	100pM	S4
AATTCC	CAGATC	509	71	F	11	167	norm_1pM	1pM	S4
AATTCC	GCCAAT	12133	71	F	11	167	norm_10pM	10pM	S4
AATTCC	TTAGGC	18447	71	F	11	167	S_RBD_IgG		S4
CGCGGC	ACAGTG	224364	59	E	11	167	norm_100pM	100pM	S4
CGCGGC	CAGATC	740	59	E	11	167	norm_1pM	1pM	S4
CGCGGC	GCCAAT	17194	59	E	11	167	norm_10pM	10pM	S4
CGCGGC	TTAGGC	24667	59	E	11	167	S_RBD_IgG		S4
AGATGT	ACAGTG	270633	72	F	12	168	norm_100pM	100pM	S4
AGATGT	CAGATC	886	72	F	12	168	norm_1pM	1pM	S4
AGATGT	GCCAAT	21105	72	F	12	168	norm_10pM	10pM	S4
AGATGT	TTAGGC	40110	72	F	12	168	S_RBD_IgG		S4
TGCGCT	ACAGTG	310094	60	E	12	168	norm_100pM	100pM	S4
TGCGCT	CAGATC	1035	60	E	12	168	norm_1pM	1pM	S4
TGCGCT	GCCAAT	23711	60	E	12	168	norm_10pM	10pM	S4
TGCGCT	TTAGGC	39717	60	E	12	168	S_RBD_IgG		S4
CTAAGG	ACAGTG	325498	85	H	1	169	norm_100pM	100pM	S4
CTAAGG	CAGATC	1069	85	H	1	169	norm_1pM	1pM	S4
CTAAGG	GCCAAT	25304	85	H	1	169	norm_10pM	10pM	S4
CTAAGG	TTAGGC	35452	85	H	1	169	S_RBD_IgG		S4
GGAGAA	ACAGTG	308346	73	G	1	169	norm_100pM	100pM	S4
GGAGAA	CAGATC	1053	73	G	1	169	norm_1pM	1pM	S4
GGAGAA	GCCAAT	23616	73	G	1	169	norm_10pM	10pM	S4
GGAGAA	TTAGGC	22777	73	G	1	169	S_RBD_IgG		S4
ATAGAT	ACAGTG	225384	74	G	2	170	norm_100pM	100pM	S4
ATAGAT	CAGATC	796	74	G	2	170	norm_1pM	1pM	S4
ATAGAT	GCCAAT	17320	74	G	2	170	norm_10pM	10pM	S4
ATAGAT	TTAGGC	13946	74	G	2	170	S_RBD_IgG		S4
ATCCAA	ACAGTG	351630	86	H	2	170	norm_100pM	100pM	S4
ATCCAA	CAGATC	1202	86	H	2	170	norm_1pM	1pM	S4
ATCCAA	GCCAAT	26897	86	H	2	170	norm_10pM	10pM	S4
ATCCAA	TTAGGC	22586	86	H	2	170	S_RBD_IgG		S4
GTGAGA	ACAGTG	300490	87	H	3	171	norm_100pM	100pM	S4
GTGAGA	CAGATC	986	87	H	3	171	norm_1pM	1pM	S4
GTGAGA	GCCAAT	23119	87	H	3	171	norm_10pM	10pM	S4
GTGAGA	TTAGGC	46639	87	H	3	171	S_RBD_IgG		S4
TATGCA	ACAGTG	250815	75	G	3	171	norm_100pM	100pM	S4
TATGCA	CAGATC	870	75	G	3	171	norm_1pM	1pM	S4
TATGCA	GCCAAT	19344	75	G	3	171	norm_10pM	10pM	S4
TATGCA	TTAGGC	37141	75	G	3	171	S_RBD_IgG		S4
CCTATT	ACAGTG	183677	76	G	4	172	norm_100pM	100pM	S4
CCTATT	CAGATC	658	76	G	4	172	norm_1pM	1pM	S4
CCTATT	GCCAAT	14109	76	G	4	172	norm_10pM	10pM	S4
CCTATT	TTAGGC	18906	76	G	4	172	S_RBD_IgG		S4
TAAGAC	ACAGTG	298198	88	H	4	172	norm_100pM	100pM	S4
TAAGAC	CAGATC	1066	88	H	4	172	norm_1pM	1pM	S4
TAAGAC	GCCAAT	23151	88	H	4	172	norm_10pM	10pM	S4
TAAGAC	TTAGGC	33329	88	H	4	172	S_RBD_IgG		S4
CGTTAG	ACAGTG	219643	89	H	5	173	norm_100pM	100pM	S4
CGTTAG	CAGATC	825	89	H	5	173	norm_1pM	1pM	S4
CGTTAG	GCCAAT	16874	89	H	5	173	norm_10pM	10pM	S4
CGTTAG	TTAGGC	16557	89	H	5	173	S_RBD_IgG		S4
TAACCG	ACAGTG	297183	77	G	5	173	norm_100pM	100pM	S4
TAACCG	CAGATC	1027	77	G	5	173	norm_1pM	1pM	S4
TAACCG	GCCAAT	22932	77	G	5	173	norm_10pM	10pM	S4
TAACCG	TTAGGC	19830	77	G	5	173	S_RBD_IgG		S4
AGTCTC	ACAGTG	263134	78	G	6	174	norm_100pM	100pM	S4
AGTCTC	CAGATC	927	78	G	6	174	norm_1pM	1pM	S4
AGTCTC	GCCAAT	20333	78	G	6	174	norm_10pM	10pM	S4
AGTCTC	TTAGGC	13785	78	G	6	174	S_RBD_IgG		S4
GTGTAT	ACAGTG	242449	90	H	6	174	norm_100pM	100pM	S4
GTGTAT	CAGATC	850	90	H	6	174	norm_1pM	1pM	S4
GTGTAT	GCCAAT	18647	90	H	6	174	norm_10pM	10pM	S4
GTGTAT	TTAGGC	14125	90	H	6	174	S_RBD_IgG		S4
GAATGC	ACAGTG	265456	91	H	7	175	norm_100pM	100pM	S4
GAATGC	CAGATC	947	91	H	7	175	norm_1pM	1pM	S4
GAATGC	GCCAAT	20454	91	H	7	175	norm_10pM	10pM	S4
GAATGC	TTAGGC	47211	91	H	7	175	S_RBD_IgG		S4
TGGAGC	ACAGTG	244091	79	G	7	175	norm_100pM	100pM	S4
TGGAGC	CAGATC	808	79	G	7	175	norm_1pM	1pM	S4
TGGAGC	GCCAAT	18844	79	G	7	175	norm_10pM	10pM	S4
TGGAGC	TTAGGC	40397	79	G	7	175	S_RBD_IgG		S4
AGAGTA	ACAGTG	222820	92	H	8	176	norm_100pM	100pM	S4
AGAGTA	CAGATC	775	92	H	8	176	norm_1pM	1pM	S4
AGAGTA	GCCAAT	17384	92	H	8	176	norm_10pM	10pM	S4
AGAGTA	TTAGGC	24790	92	H	8	176	S_RBD_IgG		S4
CTGCAT	ACAGTG	266597	80	G	8	176	norm_100pM	100pM	S4
CTGCAT	CAGATC	938	80	G	8	176	norm_1pM	1pM	S4
CTGCAT	GCCAAT	20701	80	G	8	176	norm_10pM	10pM	S4
CTGCAT	TTAGGC	27454	80	G	8	176	S_RBD_IgG		S4
AGTCAA	ACAGTG	194802	13	B	1	177	norm_100pM	100pM	S5
AGTCAA	CAGATC	656	13	B	1	177	norm_1pM	1pM	S5
AGTCAA	GCCAAT	15127	13	B	1	177	norm_10pM	10pM	S5
AGTCAA	TTAGGC	23883	13	B	1	177	S_RBD_IgG		S5
ATCACG	ACAGTG	176998	1	A	1	177	norm_100pM	100pM	S5
ATCACG	CAGATC	592	1	A	1	177	norm_1pM	1pM	S5
ATCACG	GCCAAT	13599	1	A	1	177	norm_10pM	10pM	S5
ATCACG	TTAGGC	21742	1	A	1	177	S_RBD_IgG		S5
AGTTCC	ACAGTG	210310	14	B	2	178	norm_100pM	100pM	S5
AGTTCC	CAGATC	687	14	B	2	178	norm_1pM	1pM	S5
AGTTCC	GCCAAT	16244	14	B	2	178	norm_10pM	10pM	S5
AGTTCC	TTAGGC	3444	14	B	2	178	S_RBD_IgG		S5
CGATGT	ACAGTG	76573	2	A	2	178	norm_100pM	100pM	S5
CGATGT	CAGATC	227	2	A	2	178	norm_1pM	1pM	S5
CGATGT	GCCAAT	5943	2	A	2	178	norm_10pM	10pM	S5
CGATGT	TTAGGC	1134	2	A	2	178	S_RBD_IgG		S5
ATGTCA	ACAGTG	211547	15	B	3	179	norm_100pM	100pM	S5
ATGTCA	CAGATC	712	15	B	3	179	norm_1pM	1pM	S5
ATGTCA	GCCAAT	16384	15	B	3	179	norm_10pM	10pM	S5
ATGTCA	TTAGGC	35776	15	B	3	179	S_RBD_IgG		S5
TTAGGC	ACAGTG	203567	3	A	3	179	norm_100pM	100pM	S5
TTAGGC	CAGATC	761	3	A	3	179	norm_1pM	1pM	S5
TTAGGC	GCCAAT	16054	3	A	3	179	norm_10pM	10pM	S5
TTAGGC	TTAGGC	29673	3	A	3	179	S_RBD_IgG		S5
CCGTCC	ACAGTG	253762	16	B	4	180	norm_100pM	100pM	S5
CCGTCC	CAGATC	899	16	B	4	180	norm_1pM	1pM	S5
CCGTCC	GCCAAT	19885	16	B	4	180	norm_10pM	10pM	S5
CCGTCC	TTAGGC	35683	16	B	4	180	S_RBD_IgG		S5
TGACCA	ACAGTG	215365	4	A	4	180	norm_100pM	100pM	S5
TGACCA	CAGATC	705	4	A	4	180	norm_1pM	1pM	S5
TGACCA	GCCAAT	16956	4	A	4	180	norm_10pM	10pM	S5
TGACCA	TTAGGC	26573	4	A	4	180	S_RBD_IgG		S5
ACAGTG	ACAGTG	199463	5	A	5	181	norm_100pM	100pM	S5
ACAGTG	CAGATC	674	5	A	5	181	norm_1pM	1pM	S5
ACAGTG	GCCAAT	15377	5	A	5	181	norm_10pM	10pM	S5
ACAGTG	TTAGGC	16277	5	A	5	181	S_RBD_IgG		S5
GTAGAG	ACAGTG	211016	17	B	5	181	norm_100pM	100pM	S5
GTAGAG	CAGATC	721	17	B	5	181	norm_1pM	1pM	S5
GTAGAG	GCCAAT	16225	17	B	5	181	norm_10pM	10pM	S5
GTAGAG	TTAGGC	22588	17	B	5	181	S_RBD_IgG		S5
GCCAAT	ACAGTG	220814	6	A	6	182	norm_100pM	100pM	S5
GCCAAT	CAGATC	754	6	A	6	182	norm_1pM	1pM	S5
GCCAAT	GCCAAT	17479	6	A	6	182	norm_10pM	10pM	S5
GCCAAT	TTAGGC	44423	6	A	6	182	S_RBD_IgG		S5
GTCCGC	ACAGTG	167994	18	B	6	182	norm_100pM	100pM	S5
GTCCGC	CAGATC	526	18	B	6	182	norm_1pM	1pM	S5
GTCCGC	GCCAAT	12983	18	B	6	182	norm_10pM	10pM	S5
GTCCGC	TTAGGC	34507	18	B	6	182	S_RBD_IgG		S5
CAGATC	ACAGTG	182433	7	A	7	183	norm_100pM	100pM	S5
CAGATC	CAGATC	632	7	A	7	183	norm_1pM	1pM	S5
CAGATC	GCCAAT	14050	7	A	7	183	norm_10pM	10pM	S5
CAGATC	TTAGGC	14440	7	A	7	183	S_RBD_IgG		S5
GTGAAA	ACAGTG	184696	19	B	7	183	norm_100pM	100pM	S5
GTGAAA	CAGATC	621	19	B	7	183	norm_1pM	1pM	S5
GTGAAA	GCCAAT	14430	19	B	7	183	norm_10pM	10pM	S5
GTGAAA	TTAGGC	17034	19	B	7	183	S_RBD_IgG		S5
ACTTGA	ACAGTG	197845	8	A	8	184	norm_100pM	100pM	S5
ACTTGA	CAGATC	676	8	A	8	184	norm_1pM	1pM	S5
ACTTGA	GCCAAT	15392	8	A	8	184	norm_10pM	10pM	S5
ACTTGA	TTAGGC	19663	8	A	8	184	S_RBD_IgG		S5
GTGGCC	ACAGTG	234368	20	B	8	184	norm_100pM	100pM	S5
GTGGCC	CAGATC	868	20	B	8	184	norm_1pM	1pM	S5
GTGGCC	GCCAAT	18355	20	B	8	184	norm_10pM	10pM	S5
GTGGCC	TTAGGC	27020	20	B	8	184	S_RBD_IgG		S5
GATCAG	ACAGTG	186765	9	A	9	185	norm_100pM	100pM	S5
GATCAG	CAGATC	615	9	A	9	185	norm_1pM	1pM	S5
GATCAG	GCCAAT	14430	9	A	9	185	norm_10pM	10pM	S5
GATCAG	TTAGGC	9751	9	A	9	185	S_RBD_IgG		S5
GTTTCG	ACAGTG	199267	21	B	9	185	norm_100pM	100pM	S5
GTTTCG	CAGATC	678	21	B	9	185	norm_1pM	1pM	S5
GTTTCG	GCCAAT	15734	21	B	9	185	norm_10pM	10pM	S5
GTTTCG	TTAGGC	11425	21	B	9	185	S_RBD_IgG		S5
CGTACG	ACAGTG	150101	22	B	10	186	norm_100pM	100pM	S5
CGTACG	CAGATC	507	22	B	10	186	norm_1pM	1pM	S5
CGTACG	GCCAAT	11655	22	B	10	186	norm_10pM	10pM	S5
CGTACG	TTAGGC	15297	22	B	10	186	S_RBD_IgG		S5
TAGCTT	ACAGTG	151999	10	A	10	186	norm_100pM	100pM	S5
TAGCTT	CAGATC	529	10	A	10	186	norm_1pM	1pM	S5
TAGCTT	GCCAAT	12137	10	A	10	186	norm_10pM	10pM	S5
TAGCTT	TTAGGC	14357	10	A	10	186	S_RBD_IgG		S5
GAGTGG	ACAGTG	156567	23	B	11	187	norm_100pM	100pM	S5
GAGTGG	CAGATC	565	23	B	11	187	norm_1pM	1pM	S5
GAGTGG	GCCAAT	11986	23	B	11	187	norm_10pM	10pM	S5
GAGTGG	TTAGGC	15826	23	B	11	187	S_RBD_IgG		S5
GGCTAC	ACAGTG	169103	11	A	11	187	norm_100pM	100pM	S5
GGCTAC	CAGATC	627	11	A	11	187	norm_1pM	1pM	S5
GGCTAC	GCCAAT	12984	11	A	11	187	norm_10pM	10pM	S5
GGCTAC	TTAGGC	16081	11	A	11	187	S_RBD_IgG		S5
CTTGTA	ACAGTG	192298	12	A	12	188	norm_100pM	100pM	S5
CTTGTA	CAGATC	658	12	A	12	188	norm_1pM	1pM	S5
CTTGTA	GCCAAT	15175	12	A	12	188	norm_10pM	10pM	S5
CTTGTA	TTAGGC	7451	12	A	12	188	S_RBD_IgG		S5
GGTAGC	ACAGTG	173163	24	B	12	188	norm_100pM	100pM	S5
GGTAGC	CAGATC	603	24	B	12	188	norm_1pM	1pM	S5
GGTAGC	GCCAAT	13655	24	B	12	188	norm_10pM	10pM	S5
GGTAGC	TTAGGC	7659	24	B	12	188	S_RBD_IgG		S5
ACTGAT	ACAGTG	212066	25	C	1	189	norm_100pM	100pM	S5
ACTGAT	CAGATC	704	25	C	1	189	norm_1pM	1pM	S5
ACTGAT	GCCAAT	16607	25	C	1	189	norm_10pM	10pM	S5
ACTGAT	TTAGGC	6454	25	C	1	189	S_RBD_IgG		S5
CGGAAT	ACAGTG	191625	37	D	1	189	norm_100pM	100pM	S5
CGGAAT	CAGATC	643	37	D	1	189	norm_1pM	1pM	S5
CGGAAT	GCCAAT	14849	37	D	1	189	norm_10pM	10pM	S5
CGGAAT	TTAGGC	6498	37	D	1	189	S_RBD_IgG		S5
ATGAGC	ACAGTG	216727	26	C	2	190	norm_100pM	100pM	S5
ATGAGC	CAGATC	765	26	C	2	190	norm_1pM	1pM	S5
ATGAGC	GCCAAT	16908	26	C	2	190	norm_10pM	10pM	S5
ATGAGC	TTAGGC	28492	26	C	2	190	S_RBD_IgG		S5
CTAGCT	ACAGTG	187312	38	D	2	190	norm_100pM	100pM	S5
CTAGCT	CAGATC	643	38	D	2	190	norm_1pM	1pM	S5
CTAGCT	GCCAAT	14697	38	D	2	190	norm_10pM	10pM	S5
CTAGCT	TTAGGC	26425	38	D	2	190	S_RBD_IgG		S5
ATTCCT	ACAGTG	241417	27	C	3	191	norm_100pM	100pM	S5
ATTCCT	CAGATC	837	27	C	3	191	norm_1pM	1pM	S5
ATTCCT	GCCAAT	19004	27	C	3	191	norm_10pM	10pM	S5
ATTCCT	TTAGGC	6727	27	C	3	191	S_RBD_IgG		S5
CTATAC	ACAGTG	197835	39	D	3	191	norm_100pM	100pM	S5
CTATAC	CAGATC	703	39	D	3	191	norm_1pM	1pM	S5
CTATAC	GCCAAT	15579	39	D	3	191	norm_10pM	10pM	S5
CTATAC	TTAGGC	6036	39	D	3	191	S_RBD_IgG		S5
CAAAAG	ACAGTG	229161	28	C	4	192	norm_100pM	100pM	S5
CAAAAG	CAGATC	828	28	C	4	192	norm_1pM	1pM	S5
CAAAAG	GCCAAT	17747	28	C	4	192	norm_10pM	10pM	S5
CAAAAG	TTAGGC	25969	28	C	4	192	S_RBD_IgG		S5
CTCAGA	ACAGTG	190707	40	D	4	192	norm_100pM	100pM	S5
CTCAGA	CAGATC	659	40	D	4	192	norm_1pM	1pM	S5
CTCAGA	GCCAAT	14669	40	D	4	192	norm_10pM	10pM	S5
CTCAGA	TTAGGC	22202	40	D	4	192	S_RBD_IgG		S5
CAACTA	ACAGTG	200473	29	C	5	193	norm_100pM	100pM	S5
CAACTA	CAGATC	661	29	C	5	193	norm_1pM	1pM	S5
CAACTA	GCCAAT	15495	29	C	5	193	norm_10pM	10pM	S5
CAACTA	TTAGGC	16580	29	C	5	193	S_RBD_IgG		S5
GACGAC	ACAGTG	160515	41	D	5	193	norm_100pM	100pM	S5
GACGAC	CAGATC	531	41	D	5	193	norm_1pM	1pM	S5
GACGAC	GCCAAT	12381	41	D	5	193	norm_10pM	10pM	S5
GACGAC	TTAGGC	12240	41	D	5	193	S_RBD_IgG		S5
CACCGG	ACAGTG	205405	30	C	6	194	norm_100pM	100pM	S5
CACCGG	CAGATC	685	30	C	6	194	norm_1pM	1pM	S5
CACCGG	GCCAAT	16040	30	C	6	194	norm_10pM	10pM	S5
CACCGG	TTAGGC	29752	30	C	6	194	S_RBD_IgG		S5
TAATCG	ACAGTG	165690	42	D	6	194	norm_100pM	100pM	S5
TAATCG	CAGATC	557	42	D	6	194	norm_1pM	1pM	S5
TAATCG	GCCAAT	12872	42	D	6	194	norm_10pM	10pM	S5
TAATCG	TTAGGC	24833	42	D	6	194	S_RBD_IgG		S5
CACGAT	ACAGTG	220342	31	C	7	195	norm_100pM	100pM	S5
CACGAT	CAGATC	734	31	C	7	195	norm_1pM	1pM	S5
CACGAT	GCCAAT	17065	31	C	7	195	norm_10pM	10pM	S5
CACGAT	TTAGGC	13682	31	C	7	195	S_RBD_IgG		S5
TACAGC	ACAGTG	151360	43	D	7	195	norm_100pM	100pM	S5
TACAGC	CAGATC	518	43	D	7	195	norm_1pM	1pM	S5
TACAGC	GCCAAT	11651	43	D	7	195	norm_10pM	10pM	S5
TACAGC	TTAGGC	10477	43	D	7	195	S_RBD_IgG		S5
CACTCA	ACAGTG	187344	32	C	8	196	norm_100pM	100pM	S5
CACTCA	CAGATC	668	32	C	8	196	norm_1pM	1pM	S5
CACTCA	GCCAAT	14670	32	C	8	196	norm_10pM	10pM	S5
CACTCA	TTAGGC	28387	32	C	8	196	S_RBD_IgG		S5
TATAAT	ACAGTG	172327	44	D	8	196	norm_100pM	100pM	S5
TATAAT	CAGATC	645	44	D	8	196	norm_1pM	1pM	S5
TATAAT	GCCAAT	13309	44	D	8	196	norm_10pM	10pM	S5
TATAAT	TTAGGC	29768	44	D	8	196	S_RBD_IgG		S5
CAGGCG	ACAGTG	163389	33	C	9	197	norm_100pM	100pM	S5
CAGGCG	CAGATC	603	33	C	9	197	norm_1pM	1pM	S5
CAGGCG	GCCAAT	12581	33	C	9	197	norm_10pM	10pM	S5
CAGGCG	TTAGGC	14168	33	C	9	197	S_RBD_IgG		S5
TCATTC	ACAGTG	191101	45	D	9	197	norm_100pM	100pM	S5
TCATTC	CAGATC	602	45	D	9	197	norm_1pM	1pM	S5
TCATTC	GCCAAT	14672	45	D	9	197	norm_10pM	10pM	S5
TCATTC	TTAGGC	17891	45	D	9	197	S_RBD_IgG		S5
CATGGC	ACAGTG	179107	34	C	10	198	norm_100pM	100pM	S5
CATGGC	CAGATC	624	34	C	10	198	norm_1pM	1pM	S5
CATGGC	GCCAAT	13742	34	C	10	198	norm_10pM	10pM	S5
CATGGC	TTAGGC	4122	34	C	10	198	S_RBD_IgG		S5
TCCCGA	ACAGTG	182333	46	D	10	198	norm_100pM	100pM	S5
TCCCGA	CAGATC	604	46	D	10	198	norm_1pM	1pM	S5
TCCCGA	GCCAAT	14129	46	D	10	198	norm_10pM	10pM	S5
TCCCGA	TTAGGC	4638	46	D	10	198	S_RBD_IgG		S5
CATTTT	ACAGTG	171967	35	C	11	199	norm_100pM	100pM	S5
CATTTT	CAGATC	609	35	C	11	199	norm_1pM	1pM	S5
CATTTT	GCCAAT	13161	35	C	11	199	norm_10pM	10pM	S5
CATTTT	TTAGGC	19528	35	C	11	199	S_RBD_IgG		S5
TCGAAG	ACAGTG	139516	47	D	11	199	norm_100pM	100pM	S5
TCGAAG	CAGATC	452	47	D	11	199	norm_1pM	1pM	S5
TCGAAG	GCCAAT	10935	47	D	11	199	norm_10pM	10pM	S5
TCGAAG	TTAGGC	17205	47	D	11	199	S_RBD_IgG		S5
CCAACA	ACAGTG	192065	36	C	12	200	norm_100pM	100pM	S5
CCAACA	CAGATC	645	36	C	12	200	norm_1pM	1pM	S5
CCAACA	GCCAAT	14601	36	C	12	200	norm_10pM	10pM	S5
CCAACA	TTAGGC	8235	36	C	12	200	S_RBD_IgG		S5
TCGGCA	ACAGTG	183792	48	D	12	200	norm_100pM	100pM	S5
TCGGCA	CAGATC	643	48	D	12	200	norm_1pM	1pM	S5
TCGGCA	GCCAAT	14376	48	D	12	200	norm_10pM	10pM	S5
TCGGCA	TTAGGC	8331	48	D	12	200	S_RBD_IgG		S5
AACGGA	ACAGTG	188979	61	F	1	201	norm_100pM	100pM	S5
AACGGA	CAGATC	668	61	F	1	201	norm_1pM	1pM	S5
AACGGA	GCCAAT	14627	61	F	1	201	norm_10pM	10pM	S5
AACGGA	TTAGGC	13254	61	F	1	201	S_RBD_IgG		S5
GTACTT	ACAGTG	191462	49	E	1	201	norm_100pM	100pM	S5
GTACTT	CAGATC	653	49	E	1	201	norm_1pM	1pM	S5
GTACTT	GCCAAT	15041	49	E	1	201	norm_10pM	10pM	S5
GTACTT	TTAGGC	12796	49	E	1	201	S_RBD_IgG		S5
ATGGCA	ACAGTG	218060	50	E	2	202	norm_100pM	100pM	S5
ATGGCA	CAGATC	730	50	E	2	202	norm_1pM	1pM	S5
ATGGCA	GCCAAT	17305	50	E	2	202	norm_10pM	10pM	S5
ATGGCA	TTAGGC	18761	50	E	2	202	S_RBD_IgG		S5
GACGAT	ACAGTG	211328	62	F	2	202	norm_100pM	100pM	S5
GACGAT	CAGATC	691	62	F	2	202	norm_1pM	1pM	S5
GACGAT	GCCAAT	16437	62	F	2	202	norm_10pM	10pM	S5
GACGAT	TTAGGC	18233	62	F	2	202	S_RBD_IgG		S5
AAGGAG	ACAGTG	197567	51	E	3	203	norm_100pM	100pM	S5
AAGGAG	CAGATC	686	51	E	3	203	norm_1pM	1pM	S5
AAGGAG	GCCAAT	15228	51	E	3	203	norm_10pM	10pM	S5
AAGGAG	TTAGGC	6474	51	E	3	203	S_RBD_IgG		S5
TTGCGG	ACAGTG	203363	63	F	3	203	norm_100pM	100pM	S5
TTGCGG	CAGATC	719	63	F	3	203	norm_1pM	1pM	S5
TTGCGG	GCCAAT	15690	63	F	3	203	norm_10pM	10pM	S5
TTGCGG	TTAGGC	6940	63	F	3	203	S_RBD_IgG		S5
CAAGTT	ACAGTG	200229	64	F	4	204	norm_100pM	100pM	S5
CAAGTT	CAGATC	735	64	F	4	204	norm_1pM	1pM	S5
CAAGTT	GCCAAT	15477	64	F	4	204	norm_10pM	10pM	S5
CAAGTT	TTAGGC	35975	64	F	4	204	S_RBD_IgG		S5
CTATCT	ACAGTG	175662	52	E	4	204	norm_100pM	100pM	S5
CTATCT	CAGATC	634	52	E	4	204	norm_1pM	1pM	S5
CTATCT	GCCAAT	13580	52	E	4	204	norm_10pM	10pM	S5
CTATCT	TTAGGC	29437	52	E	4	204	S_RBD_IgG		S5
TACCTT	ACAGTG	191327	65	F	5	205	norm_100pM	100pM	S5
TACCTT	CAGATC	618	65	F	5	205	norm_1pM	1pM	S5
TACCTT	GCCAAT	14923	65	F	5	205	norm_10pM	10pM	S5
TACCTT	TTAGGC	3692	65	F	5	205	S_RBD_IgG		S5
TATATC	ACAGTG	201618	53	E	5	205	norm_100pM	100pM	S5
TATATC	CAGATC	710	53	E	5	205	norm_1pM	1pM	S5
TATATC	GCCAAT	15620	53	E	5	205	norm_10pM	10pM	S5
TATATC	TTAGGC	3628	53	E	5	205	S_RBD_IgG		S5
GAGCGC	ACAGTG	197448	66	F	6	206	norm_100pM	100pM	S5
GAGCGC	CAGATC	730	66	F	6	206	norm_1pM	1pM	S5
GAGCGC	GCCAAT	15146	66	F	6	206	norm_10pM	10pM	S5
GAGCGC	TTAGGC	18308	66	F	6	206	S_RBD_IgG		S5
TATTAT	ACAGTG	153190	54	E	6	206	norm_100pM	100pM	S5
TATTAT	CAGATC	498	54	E	6	206	norm_1pM	1pM	S5
TATTAT	GCCAAT	12039	54	E	6	206	norm_10pM	10pM	S5
TATTAT	TTAGGC	12826	54	E	6	206	S_RBD_IgG		S5
ACGAGG	ACAGTG	177922	67	F	7	207	norm_100pM	100pM	S5
ACGAGG	CAGATC	577	67	F	7	207	norm_1pM	1pM	S5
ACGAGG	GCCAAT	13518	67	F	7	207	norm_10pM	10pM	S5
ACGAGG	TTAGGC	3616	67	F	7	207	S_RBD_IgG		S5
AGCACC	ACAGTG	175280	55	E	7	207	norm_100pM	100pM	S5
AGCACC	CAGATC	577	55	E	7	207	norm_1pM	1pM	S5
AGCACC	GCCAAT	13502	55	E	7	207	norm_10pM	10pM	S5
AGCACC	TTAGGC	3562	55	E	7	207	S_RBD_IgG		S5
AATCGT	ACAGTG	197874	68	F	8	208	norm_100pM	100pM	S5
AATCGT	CAGATC	698	68	F	8	208	norm_1pM	1pM	S5
AATCGT	GCCAAT	15252	68	F	8	208	norm_10pM	10pM	S5
AATCGT	TTAGGC	3689	68	F	8	208	S_RBD_IgG		S5
TCCACA	ACAGTG	185729	56	E	8	208	norm_100pM	100pM	S5
TCCACA	CAGATC	647	56	E	8	208	norm_1pM	1pM	S5
TCCACA	GCCAAT	14422	56	E	8	208	norm_10pM	10pM	S5
TCCACA	TTAGGC	3289	56	E	8	208	S_RBD_IgG		S5
GAGTCT	ACAGTG	163815	69	F	9	209	norm_100pM	100pM	S5
GAGTCT	CAGATC	578	69	F	9	209	norm_1pM	1pM	S5
GAGTCT	GCCAAT	12764	69	F	9	209	norm_10pM	10pM	S5
GAGTCT	TTAGGC	12748	69	F	9	209	S_RBD_IgG		S5
TTCTCG	ACAGTG	167414	57	E	9	209	norm_100pM	100pM	S5
TTCTCG	CAGATC	593	57	E	9	209	norm_1pM	1pM	S5
TTCTCG	GCCAAT	13245	57	E	9	209	norm_10pM	10pM	S5
TTCTCG	TTAGGC	12826	57	E	9	209	S_RBD_IgG		S5
AGACCA	ACAGTG	196124	70	F	10	210	norm_100pM	100pM	S5
AGACCA	CAGATC	693	70	F	10	210	norm_1pM	1pM	S5
AGACCA	GCCAAT	15335	70	F	10	210	norm_10pM	10pM	S5
AGACCA	TTAGGC	24955	70	F	10	210	S_RBD_IgG		S5
TCCTGC	ACAGTG	155116	58	E	10	210	norm_100pM	100pM	S5
TCCTGC	CAGATC	554	58	E	10	210	norm_1pM	1pM	S5
TCCTGC	GCCAAT	12203	58	E	10	210	norm_10pM	10pM	S5
TCCTGC	TTAGGC	20234	58	E	10	210	S_RBD_IgG		S5
AATTCC	ACAGTG	165018	71	F	11	211	norm_100pM	100pM	S5
AATTCC	CAGATC	594	71	F	11	211	norm_1pM	1pM	S5
AATTCC	GCCAAT	12791	71	F	11	211	norm_10pM	10pM	S5
AATTCC	TTAGGC	17388	71	F	11	211	S_RBD_IgG		S5
CGCGGC	ACAGTG	167010	59	E	11	211	norm_100pM	100pM	S5
CGCGGC	CAGATC	613	59	E	11	211	norm_1pM	1pM	S5
CGCGGC	GCCAAT	12996	59	E	11	211	norm_10pM	10pM	S5
CGCGGC	TTAGGC	16995	59	E	11	211	S_RBD_IgG		S5
AGATGT	ACAGTG	182410	72	F	12	212	norm_100pM	100pM	S5
AGATGT	CAGATC	635	72	F	12	212	norm_1pM	1pM	S5
AGATGT	GCCAAT	14099	72	F	12	212	norm_10pM	10pM	S5
AGATGT	TTAGGC	17705	72	F	12	212	S_RBD_IgG		S5
TGCGCT	ACAGTG	193675	60	E	12	212	norm_100pM	100pM	S5
TGCGCT	CAGATC	694	60	E	12	212	norm_1pM	1pM	S5
TGCGCT	GCCAAT	15357	60	E	12	212	norm_10pM	10pM	S5
TGCGCT	TTAGGC	18606	60	E	12	212	S_RBD_IgG		S5
CTAAGG	ACAGTG	120861	85	H	1	213	norm_100pM	100pM	S5
CTAAGG	CAGATC	356	85	H	1	213	norm_1pM	1pM	S5
CTAAGG	GCCAAT	9371	85	H	1	213	norm_10pM	10pM	S5
CTAAGG	TTAGGC	10441	85	H	1	213	S_RBD_IgG		S5
GGAGAA	ACAGTG	189760	73	G	1	213	norm_100pM	100pM	S5
GGAGAA	CAGATC	654	73	G	1	213	norm_1pM	1pM	S5
GGAGAA	GCCAAT	14763	73	G	1	213	norm_10pM	10pM	S5
GGAGAA	TTAGGC	14930	73	G	1	213	S_RBD_IgG		S5
ATAGAT	ACAGTG	155478	74	G	2	214	norm_100pM	100pM	S5
ATAGAT	CAGATC	571	74	G	2	214	norm_1pM	1pM	S5
ATAGAT	GCCAAT	12079	74	G	2	214	norm_10pM	10pM	S5
ATAGAT	TTAGGC	6085	74	G	2	214	S_RBD_IgG		S5
ATCCAA	ACAGTG	230951	86	H	2	214	norm_100pM	100pM	S5
ATCCAA	CAGATC	803	86	H	2	214	norm_1pM	1pM	S5
ATCCAA	GCCAAT	17980	86	H	2	214	norm_10pM	10pM	S5
ATCCAA	TTAGGC	8956	86	H	2	214	S_RBD_IgG		S5
GTGAGA	ACAGTG	209944	87	H	3	215	norm_100pM	100pM	S5
GTGAGA	CAGATC	750	87	H	3	215	norm_1pM	1pM	S5
GTGAGA	GCCAAT	16368	87	H	3	215	norm_10pM	10pM	S5
GTGAGA	TTAGGC	46597	87	H	3	215	S_RBD_IgG		S5
TATGCA	ACAGTG	182651	75	G	3	215	norm_100pM	100pM	S5
TATGCA	CAGATC	638	75	G	3	215	norm_1pM	1pM	S5
TATGCA	GCCAAT	14191	75	G	3	215	norm_10pM	10pM	S5
TATGCA	TTAGGC	39306	75	G	3	215	S_RBD_IgG		S5
CCTATT	ACAGTG	218580	76	G	4	216	norm_100pM	100pM	S5
CCTATT	CAGATC	742	76	G	4	216	norm_1pM	1pM	S5
CCTATT	GCCAAT	17040	76	G	4	216	norm_10pM	10pM	S5
CCTATT	TTAGGC	8434	76	G	4	216	S_RBD_IgG		S5
TAAGAC	ACAGTG	238166	88	H	4	216	norm_100pM	100pM	S5
TAAGAC	CAGATC	830	88	H	4	216	norm_1pM	1pM	S5
TAAGAC	GCCAAT	18669	88	H	4	216	norm_10pM	10pM	S5
TAAGAC	TTAGGC	9895	88	H	4	216	S_RBD_IgG		S5
CGTTAG	ACAGTG	202876	89	H	5	217	norm_100pM	100pM	S5
CGTTAG	CAGATC	741	89	H	5	217	norm_1pM	1pM	S5
CGTTAG	GCCAAT	15525	89	H	5	217	norm_10pM	10pM	S5
CGTTAG	TTAGGC	53698	89	H	5	217	S_RBD_IgG		S5
TAACCG	ACAGTG	179544	77	G	5	217	norm_100pM	100pM	S5
TAACCG	CAGATC	614	77	G	5	217	norm_1pM	1pM	S5
TAACCG	GCCAAT	13736	77	G	5	217	norm_10pM	10pM	S5
TAACCG	TTAGGC	42761	77	G	5	217	S_RBD_IgG		S5
AGTCTC	ACAGTG	185110	78	G	6	218	norm_100pM	100pM	S5
AGTCTC	CAGATC	657	78	G	6	218	norm_1pM	1pM	S5
AGTCTC	GCCAAT	14247	78	G	6	218	norm_10pM	10pM	S5
AGTCTC	TTAGGC	13018	78	G	6	218	S_RBD_IgG		S5
GTGTAT	ACAGTG	194161	90	H	6	218	norm_100pM	100pM	S5
GTGTAT	CAGATC	656	90	H	6	218	norm_1pM	1pM	S5
GTGTAT	GCCAAT	15147	90	H	6	218	norm_10pM	10pM	S5
GTGTAT	TTAGGC	13682	90	H	6	218	S_RBD_IgG		S5
GAATGC	ACAGTG	206614	91	H	7	219	norm_100pM	100pM	S5
GAATGC	CAGATC	718	91	H	7	219	norm_1pM	1pM	S5
GAATGC	GCCAAT	16047	91	H	7	219	norm_10pM	10pM	S5
GAATGC	TTAGGC	17659	91	H	7	219	S_RBD_IgG		S5
TGGAGC	ACAGTG	188526	79	G	7	219	norm_100pM	100pM	S5
TGGAGC	CAGATC	658	79	G	7	219	norm_1pM	1pM	S5
TGGAGC	GCCAAT	14572	79	G	7	219	norm_10pM	10pM	S5
TGGAGC	TTAGGC	15378	79	G	7	219	S_RBD_IgG		S5
AGAGTA	ACAGTG	191748	92	H	8	220	norm_100pM	100pM	S5
AGAGTA	CAGATC	650	92	H	8	220	norm_1pM	1pM	S5
AGAGTA	GCCAAT	14964	92	H	8	220	norm_10pM	10pM	S5
AGAGTA	TTAGGC	13949	92	H	8	220	S_RBD_IgG		S5
CTGCAT	ACAGTG	199961	80	G	8	220	norm_100pM	100pM	S5
CTGCAT	CAGATC	726	80	G	8	220	norm_1pM	1pM	S5
CTGCAT	GCCAAT	15592	80	G	8	220	norm_10pM	10pM	S5
CTGCAT	TTAGGC	12602	80	G	8	220	S_RBD_IgG		S5
AGTCAA	ACAGTG	133931	13	B	1	221	norm_100pM	100pM	S6
AGTCAA	CAGATC	450	13	B	1	221	norm_1pM	1pM	S6
AGTCAA	GCCAAT	10290	13	B	1	221	norm_10pM	10pM	S6
AGTCAA	TTAGGC	9950	13	B	1	221	S_RBD_IgG		S6
ATCACG	ACAGTG	172270	1	A	1	221	norm_100pM	100pM	S6
ATCACG	CAGATC	576	1	A	1	221	norm_1pM	1pM	S6
ATCACG	GCCAAT	13078	1	A	1	221	norm_10pM	10pM	S6
ATCACG	TTAGGC	12147	1	A	1	221	S_RBD_IgG		S6
AGTTCC	ACAGTG	210506	14	B	2	222	norm_100pM	100pM	S6
AGTTCC	CAGATC	721	14	B	2	222	norm_1pM	1pM	S6
AGTTCC	GCCAAT	16038	14	B	2	222	norm_10pM	10pM	S6
AGTTCC	TTAGGC	33561	14	B	2	222	S_RBD_IgG		S6
CGATGT	ACAGTG	147413	2	A	2	222	norm_100pM	100pM	S6
CGATGT	CAGATC	487	2	A	2	222	norm_1pM	1pM	S6
CGATGT	GCCAAT	11433	2	A	2	222	norm_10pM	10pM	S6
CGATGT	TTAGGC	20906	2	A	2	222	S_RBD_IgG		S6
ATGTCA	ACAGTG	243692	15	B	3	223	norm_100pM	100pM	S6
ATGTCA	CAGATC	810	15	B	3	223	norm_1pM	1pM	S6
ATGTCA	GCCAAT	18825	15	B	3	223	norm_10pM	10pM	S6
ATGTCA	TTAGGC	27028	15	B	3	223	S_RBD_IgG		S6
TTAGGC	ACAGTG	259906	3	A	3	223	norm_100pM	100pM	S6
TTAGGC	CAGATC	874	3	A	3	223	norm_1pM	1pM	S6
TTAGGC	GCCAAT	19953	3	A	3	223	norm_10pM	10pM	S6
TTAGGC	TTAGGC	25139	3	A	3	223	S_RBD_IgG		S6
CCGTCC	ACAGTG	190508	16	B	4	224	norm_100pM	100pM	S6
CCGTCC	CAGATC	641	16	B	4	224	norm_1pM	1pM	S6
CCGTCC	GCCAAT	14851	16	B	4	224	norm_10pM	10pM	S6
CCGTCC	TTAGGC	11785	16	B	4	224	S_RBD_IgG		S6
TGACCA	ACAGTG	219069	4	A	4	224	norm_100pM	100pM	S6
TGACCA	CAGATC	722	4	A	4	224	norm_1pM	1pM	S6
TGACCA	GCCAAT	17021	4	A	4	224	norm_10pM	10pM	S6
TGACCA	TTAGGC	12787	4	A	4	224	S_RBD_IgG		S6
ACAGTG	ACAGTG	132375	5	A	5	225	norm_100pM	100pM	S6
ACAGTG	CAGATC	450	5	A	5	225	norm_1pM	1pM	S6
ACAGTG	GCCAAT	10241	5	A	5	225	norm_10pM	10pM	S6
ACAGTG	TTAGGC	11699	5	A	5	225	S_RBD_IgG		S6
GTAGAG	ACAGTG	188208	17	B	5	225	norm_100pM	100pM	S6
GTAGAG	CAGATC	624	17	B	5	225	norm_1pM	1pM	S6
GTAGAG	GCCAAT	14775	17	B	5	225	norm_10pM	10pM	S6
GTAGAG	TTAGGC	18472	17	B	5	225	S_RBD_IgG		S6
GCCAAT	ACAGTG	189206	6	A	6	226	norm_100pM	100pM	S6
GCCAAT	CAGATC	632	6	A	6	226	norm_1pM	1pM	S6
GCCAAT	GCCAAT	14635	6	A	6	226	norm_10pM	10pM	S6
GCCAAT	TTAGGC	6091	6	A	6	226	S_RBD_IgG		S6
GTCCGC	ACAGTG	166447	18	B	6	226	norm_100pM	100pM	S6
GTCCGC	CAGATC	602	18	B	6	226	norm_1pM	1pM	S6
GTCCGC	GCCAAT	12825	18	B	6	226	norm_10pM	10pM	S6
GTCCGC	TTAGGC	5675	18	B	6	226	S_RBD_IgG		S6
CAGATC	ACAGTG	206357	7	A	7	227	norm_100pM	100pM	S6
CAGATC	CAGATC	735	7	A	7	227	norm_1pM	1pM	S6
CAGATC	GCCAAT	16104	7	A	7	227	norm_10pM	10pM	S6
CAGATC	TTAGGC	22822	7	A	7	227	S_RBD_IgG		S6
GTGAAA	ACAGTG	163574	19	B	7	227	norm_100pM	100pM	S6
GTGAAA	CAGATC	594	19	B	7	227	norm_1pM	1pM	S6
GTGAAA	GCCAAT	12503	19	B	7	227	norm_10pM	10pM	S6
GTGAAA	TTAGGC	17502	19	B	7	227	S_RBD_IgG		S6
ACTTGA	ACAGTG	160605	8	A	8	228	norm_100pM	100pM	S6
ACTTGA	CAGATC	574	8	A	8	228	norm_1pM	1pM	S6
ACTTGA	GCCAAT	12464	8	A	8	228	norm_10pM	10pM	S6
ACTTGA	TTAGGC	8157	8	A	8	228	S_RBD_IgG		S6
GTGGCC	ACAGTG	147716	20	B	8	228	norm_100pM	100pM	S6
GTGGCC	CAGATC	502	20	B	8	228	norm_1pM	1pM	S6
GTGGCC	GCCAAT	11258	20	B	8	228	norm_10pM	10pM	S6
GTGGCC	TTAGGC	8947	20	B	8	228	S_RBD_IgG		S6
GATCAG	ACAGTG	147094	9	A	9	229	norm_100pM	100pM	S6
GATCAG	CAGATC	549	9	A	9	229	norm_1pM	1pM	S6
GATCAG	GCCAAT	11403	9	A	9	229	norm_10pM	10pM	S6
GATCAG	TTAGGC	23215	9	A	9	229	S_RBD_IgG		S6
GTTTCG	ACAGTG	161900	21	B	9	229	norm_100pM	100pM	S6
GTTTCG	CAGATC	567	21	B	9	229	norm_1pM	1pM	S6
GTTTCG	GCCAAT	12440	21	B	9	229	norm_10pM	10pM	S6
GTTTCG	TTAGGC	26454	21	B	9	229	S_RBD_IgG		S6
CGTACG	ACAGTG	137163	22	B	10	230	norm_100pM	100pM	S6
CGTACG	CAGATC	457	22	B	10	230	norm_1pM	1pM	S6
CGTACG	GCCAAT	10336	22	B	10	230	norm_10pM	10pM	S6
CGTACG	TTAGGC	11517	22	B	10	230	S_RBD_IgG		S6
TAGCTT	ACAGTG	183300	10	A	10	230	norm_100pM	100pM	S6
TAGCTT	CAGATC	633	10	A	10	230	norm_1pM	1pM	S6
TAGCTT	GCCAAT	14254	10	A	10	230	norm_10pM	10pM	S6
TAGCTT	TTAGGC	17033	10	A	10	230	S_RBD_IgG		S6
GAGTGG	ACAGTG	113755	23	B	11	231	norm_100pM	100pM	S6
GAGTGG	CAGATC	383	23	B	11	231	norm_1pM	1pM	S6
GAGTGG	GCCAAT	8607	23	B	11	231	norm_10pM	10pM	S6
GAGTGG	TTAGGC	8179	23	B	11	231	S_RBD_IgG		S6
GGCTAC	ACAGTG	111557	11	A	11	231	norm_100pM	100pM	S6
GGCTAC	CAGATC	379	11	A	11	231	norm_1pM	1pM	S6
GGCTAC	GCCAAT	8760	11	A	11	231	norm_10pM	10pM	S6
GGCTAC	TTAGGC	7849	11	A	11	231	S_RBD_IgG		S6
CTTGTA	ACAGTG	218318	12	A	12	232	norm_100pM	100pM	S6
CTTGTA	CAGATC	777	12	A	12	232	norm_1pM	1pM	S6
CTTGTA	GCCAAT	17027	12	A	12	232	norm_10pM	10pM	S6
CTTGTA	TTAGGC	11182	12	A	12	232	S_RBD_IgG		S6
GGTAGC	ACAGTG	200059	24	B	12	232	norm_100pM	100pM	S6
GGTAGC	CAGATC	725	24	B	12	232	norm_1pM	1pM	S6
GGTAGC	GCCAAT	15837	24	B	12	232	norm_10pM	10pM	S6
GGTAGC	TTAGGC	9358	24	B	12	232	S_RBD_IgG		S6
ACTGAT	ACAGTG	150466	25	C	1	233	norm_100pM	100pM	S6
ACTGAT	CAGATC	499	25	C	1	233	norm_1pM	1pM	S6
ACTGAT	GCCAAT	11693	25	C	1	233	norm_10pM	10pM	S6
ACTGAT	TTAGGC	17891	25	C	1	233	S_RBD_IgG		S6
CGGAAT	ACAGTG	149796	37	D	1	233	norm_100pM	100pM	S6
CGGAAT	CAGATC	532	37	D	1	233	norm_1pM	1pM	S6
CGGAAT	GCCAAT	11336	37	D	1	233	norm_10pM	10pM	S6
CGGAAT	TTAGGC	20087	37	D	1	233	S_RBD_IgG		S6
ATGAGC	ACAGTG	196130	26	C	2	234	norm_100pM	100pM	S6
ATGAGC	CAGATC	695	26	C	2	234	norm_1pM	1pM	S6
ATGAGC	GCCAAT	15218	26	C	2	234	norm_10pM	10pM	S6
ATGAGC	TTAGGC	7897	26	C	2	234	S_RBD_IgG		S6
CTAGCT	ACAGTG	155889	38	D	2	234	norm_100pM	100pM	S6
CTAGCT	CAGATC	546	38	D	2	234	norm_1pM	1pM	S6
CTAGCT	GCCAAT	11994	38	D	2	234	norm_10pM	10pM	S6
CTAGCT	TTAGGC	7371	38	D	2	234	S_RBD_IgG		S6
ATTCCT	ACAGTG	188409	27	C	3	235	norm_100pM	100pM	S6
ATTCCT	CAGATC	676	27	C	3	235	norm_1pM	1pM	S6
ATTCCT	GCCAAT	14423	27	C	3	235	norm_10pM	10pM	S6
ATTCCT	TTAGGC	18514	27	C	3	235	S_RBD_IgG		S6
CTATAC	ACAGTG	163953	39	D	3	235	norm_100pM	100pM	S6
CTATAC	CAGATC	571	39	D	3	235	norm_1pM	1pM	S6
CTATAC	GCCAAT	12696	39	D	3	235	norm_10pM	10pM	S6
CTATAC	TTAGGC	18577	39	D	3	235	S_RBD_IgG		S6
CAAAAG	ACAGTG	191950	28	C	4	236	norm_100pM	100pM	S6
CAAAAG	CAGATC	640	28	C	4	236	norm_1pM	1pM	S6
CAAAAG	GCCAAT	14457	28	C	4	236	norm_10pM	10pM	S6
CAAAAG	TTAGGC	7390	28	C	4	236	S_RBD_IgG		S6
CTCAGA	ACAGTG	172854	40	D	4	236	norm_100pM	100pM	S6
CTCAGA	CAGATC	605	40	D	4	236	norm_1pM	1pM	S6
CTCAGA	GCCAAT	13227	40	D	4	236	norm_10pM	10pM	S6
CTCAGA	TTAGGC	7148	40	D	4	236	S_RBD_IgG		S6
CAACTA	ACAGTG	189444	29	C	5	237	norm_100pM	100pM	S6
CAACTA	CAGATC	644	29	C	5	237	norm_1pM	1pM	S6
CAACTA	GCCAAT	14579	29	C	5	237	norm_10pM	10pM	S6
CAACTA	TTAGGC	7265	29	C	5	237	S_RBD_IgG		S6
GACGAC	ACAGTG	133269	41	D	5	237	norm_100pM	100pM	S6
GACGAC	CAGATC	441	41	D	5	237	norm_1pM	1pM	S6
GACGAC	GCCAAT	10223	41	D	5	237	norm_10pM	10pM	S6
GACGAC	TTAGGC	5624	41	D	5	237	S_RBD_IgG		S6
CACCGG	ACAGTG	148525	30	C	6	238	norm_100pM	100pM	S6
CACCGG	CAGATC	516	30	C	6	238	norm_1pM	1pM	S6
CACCGG	GCCAAT	11341	30	C	6	238	norm_10pM	10pM	S6
CACCGG	TTAGGC	8837	30	C	6	238	S_RBD_IgG		S6
TAATCG	ACAGTG	154930	42	D	6	238	norm_100pM	100pM	S6
TAATCG	CAGATC	495	42	D	6	238	norm_1pM	1pM	S6
TAATCG	GCCAAT	11873	42	D	6	238	norm_10pM	10pM	S6
TAATCG	TTAGGC	10705	42	D	6	238	S_RBD_IgG		S6
CACGAT	ACAGTG	175297	31	C	7	239	norm_100pM	100pM	S6
CACGAT	CAGATC	578	31	C	7	239	norm_1pM	1pM	S6
CACGAT	GCCAAT	13416	31	C	7	239	norm_10pM	10pM	S6
CACGAT	TTAGGC	18604	31	C	7	239	S_RBD_IgG		S6
TACAGC	ACAGTG	212074	43	D	7	239	norm_100pM	100pM	S6
TACAGC	CAGATC	747	43	D	7	239	norm_1pM	1pM	S6
TACAGC	GCCAAT	16387	43	D	7	239	norm_10pM	10pM	S6
TACAGC	TTAGGC	23716	43	D	7	239	S_RBD_IgG		S6
CACTCA	ACAGTG	195981	32	C	8	240	norm_100pM	100pM	S6
CACTCA	CAGATC	683	32	C	8	240	norm_1pM	1pM	S6
CACTCA	GCCAAT	14978	32	C	8	240	norm_10pM	10pM	S6
CACTCA	TTAGGC	16350	32	C	8	240	S_RBD_IgG		S6
TATAAT	ACAGTG	165764	44	D	8	240	norm_100pM	100pM	S6
TATAAT	CAGATC	571	44	D	8	240	norm_1pM	1pM	S6
TATAAT	GCCAAT	12575	44	D	8	240	norm_10pM	10pM	S6
TATAAT	TTAGGC	14639	44	D	8	240	S_RBD_IgG		S6
CAGGCG	ACAGTG	145300	33	C	9	241	norm_100pM	100pM	S6
CAGGCG	CAGATC	504	33	C	9	241	norm_1pM	1pM	S6
CAGGCG	GCCAAT	11016	33	C	9	241	norm_10pM	10pM	S6
CAGGCG	TTAGGC	5180	33	C	9	241	S_RBD_IgG		S6
TCATTC	ACAGTG	186300	45	D	9	241	norm_100pM	100pM	S6
TCATTC	CAGATC	653	45	D	9	241	norm_1pM	1pM	S6
TCATTC	GCCAAT	14311	45	D	9	241	norm_10pM	10pM	S6
TCATTC	TTAGGC	7053	45	D	9	241	S_RBD_IgG		S6
CATGGC	ACAGTG	146444	34	C	10	242	norm_100pM	100pM	S6
CATGGC	CAGATC	456	34	C	10	242	norm_1pM	1pM	S6
CATGGC	GCCAAT	11186	34	C	10	242	norm_10pM	10pM	S6
CATGGC	TTAGGC	6486	34	C	10	242	S_RBD_IgG		S6
TCCCGA	ACAGTG	127486	46	D	10	242	norm_100pM	100pM	S6
TCCCGA	CAGATC	438	46	D	10	242	norm_1pM	1pM	S6
TCCCGA	GCCAAT	9850	46	D	10	242	norm_10pM	10pM	S6
TCCCGA	TTAGGC	5801	46	D	10	242	S_RBD_IgG		S6
CATTTT	ACAGTG	129196	35	C	11	243	norm_100pM	100pM	S6
CATTTT	CAGATC	461	35	C	11	243	norm_1pM	1pM	S6
CATTTT	GCCAAT	10093	35	C	11	243	norm_10pM	10pM	S6
CATTTT	TTAGGC	9984	35	C	11	243	S_RBD_IgG		S6
TCGAAG	ACAGTG	127085	47	D	11	243	norm_100pM	100pM	S6
TCGAAG	CAGATC	389	47	D	11	243	norm_1pM	1pM	S6
TCGAAG	GCCAAT	9781	47	D	11	243	norm_10pM	10pM	S6
TCGAAG	TTAGGC	10120	47	D	11	243	S_RBD_IgG		S6
CCAACA	ACAGTG	232755	36	C	12	244	norm_100pM	100pM	S6
CCAACA	CAGATC	786	36	C	12	244	norm_1pM	1pM	S6
CCAACA	GCCAAT	17773	36	C	12	244	norm_10pM	10pM	S6
CCAACA	TTAGGC	24593	36	C	12	244	S_RBD_IgG		S6
TCGGCA	ACAGTG	200061	48	D	12	244	norm_100pM	100pM	S6
TCGGCA	CAGATC	718	48	D	12	244	norm_1pM	1pM	S6
TCGGCA	GCCAAT	15697	48	D	12	244	norm_10pM	10pM	S6
TCGGCA	TTAGGC	22178	48	D	12	244	S_RBD_IgG		S6
AACGGA	ACAGTG	148433	61	F	1	245	norm_100pM	100pM	S6
AACGGA	CAGATC	530	61	F	1	245	norm_1pM	1pM	S6
AACGGA	GCCAAT	11528	61	F	1	245	norm_10pM	10pM	S6
AACGGA	TTAGGC	8073	61	F	1	245	S_RBD_IgG		S6
GTACTT	ACAGTG	148468	49	E	1	245	norm_100pM	100pM	S6
GTACTT	CAGATC	497	49	E	1	245	norm_1pM	1pM	S6
GTACTT	GCCAAT	11541	49	E	1	245	norm_10pM	10pM	S6
GTACTT	TTAGGC	7679	49	E	1	245	S_RBD_IgG		S6
ATGGCA	ACAGTG	169956	50	E	2	246	norm_100pM	100pM	S6
ATGGCA	CAGATC	578	50	E	2	246	norm_1pM	1pM	S6
ATGGCA	GCCAAT	12936	50	E	2	246	norm_10pM	10pM	S6
ATGGCA	TTAGGC	9849	50	E	2	246	S_RBD_IgG		S6
GACGAT	ACAGTG	163346	62	F	2	246	norm_100pM	100pM	S6
GACGAT	CAGATC	582	62	F	2	246	norm_1pM	1pM	S6
GACGAT	GCCAAT	12552	62	F	2	246	norm_10pM	10pM	S6
GACGAT	TTAGGC	10706	62	F	2	246	S_RBD_IgG		S6
AAGGAG	ACAGTG	177562	51	E	3	247	norm_100pM	100pM	S6
AAGGAG	CAGATC	594	51	E	3	247	norm_1pM	1pM	S6
AAGGAG	GCCAAT	13575	51	E	3	247	norm_10pM	10pM	S6
AAGGAG	TTAGGC	8005	51	E	3	247	S_RBD_IgG		S6
TTGCGG	ACAGTG	187682	63	F	3	247	norm_100pM	100pM	S6
TTGCGG	CAGATC	690	63	F	3	247	norm_1pM	1pM	S6
TTGCGG	GCCAAT	14513	63	F	3	247	norm_10pM	10pM	S6
TTGCGG	TTAGGC	8265	63	F	3	247	S_RBD_IgG		S6
CAAGTT	ACAGTG	172913	64	F	4	248	norm_100pM	100pM	S6
CAAGTT	CAGATC	598	64	F	4	248	norm_1pM	1pM	S6
CAAGTT	GCCAAT	13272	64	F	4	248	norm_10pM	10pM	S6
CAAGTT	TTAGGC	6970	64	F	4	248	S_RBD_IgG		S6
CTATCT	ACAGTG	147730	52	E	4	248	norm_100pM	100pM	S6
CTATCT	CAGATC	523	52	E	4	248	norm_1pM	1pM	S6
CTATCT	GCCAAT	11330	52	E	4	248	norm_10pM	10pM	S6
CTATCT	TTAGGC	5916	52	E	4	248	S_RBD_IgG		S6
TACCTT	ACAGTG	147466	65	F	5	249	norm_100pM	100pM	S6
TACCTT	CAGATC	500	65	F	5	249	norm_1pM	1pM	S6
TACCTT	GCCAAT	11436	65	F	5	249	norm_10pM	10pM	S6
TACCTT	TTAGGC	7269	65	F	5	249	S_RBD_IgG		S6
TATATC	ACAGTG	134978	53	E	5	249	norm_100pM	100pM	S6
TATATC	CAGATC	443	53	E	5	249	norm_1pM	1pM	S6
TATATC	GCCAAT	10321	53	E	5	249	norm_10pM	10pM	S6
TATATC	TTAGGC	6008	53	E	5	249	S_RBD_IgG		S6
GAGCGC	ACAGTG	130865	66	F	6	250	norm_100pM	100pM	S6
GAGCGC	CAGATC	445	66	F	6	250	norm_1pM	1pM	S6
GAGCGC	GCCAAT	9960	66	F	6	250	norm_10pM	10pM	S6
GAGCGC	TTAGGC	5867	66	F	6	250	S_RBD_IgG		S6
TATTAT	ACAGTG	186426	54	E	6	250	norm_100pM	100pM	S6
TATTAT	CAGATC	614	54	E	6	250	norm_1pM	1pM	S6
[truncated: 2,595 more rows]

## Sheet: HBV_Cohort 1
Related to Figure 6–Figure Supplement 1 and 2
Well_BC	Ab_BC	Count	well_id	row_id	col_id	sample_	epitope	concentration	plate	sample
ACTGCT	ACAGTG	249895	84	G	12	H1_C5	Norm.bc	10pM	H1	blank
ACTGCT	ATCACG	187	84	G	12	H1_C5	eAg	NA	H1	blank
ACTGCT	CAGATC	4912	84	G	12	H1_C5	Norm.bc	0.5pM	H1	blank
ACTGCT	CGATGT	711	84	G	12	H1_C5	sAg	NA	H1	blank
ACTGCT	GCCAAT	24735	84	G	12	H1_C5	Norm.bc	1pM	H1	blank
CGCCAA	ACAGTG	184243	96	H	12	H1_C5	Norm.bc	10pM	H1	blank
CGCCAA	ATCACG	169	96	H	12	H1_C5	eAg	NA	H1	blank
CGCCAA	CAGATC	3510	96	H	12	H1_C5	Norm.bc	0.5pM	H1	blank
CGCCAA	CGATGT	515	96	H	12	H1_C5	sAg	NA	H1	blank
CGCCAA	GCCAAT	18724	96	H	12	H1_C5	Norm.bc	1pM	H1	blank
ACTGCT	ACAGTG	254753	84	G	12	H2_C5	Norm.bc	10pM	H2	blank
ACTGCT	ATCACG	183	84	G	12	H2_C5	eAg	NA	H2	blank
ACTGCT	CAGATC	4954	84	G	12	H2_C5	Norm.bc	0.5pM	H2	blank
ACTGCT	CGATGT	597	84	G	12	H2_C5	sAg	NA	H2	blank
ACTGCT	GCCAAT	25351	84	G	12	H2_C5	Norm.bc	1pM	H2	blank
CGCCAA	ACAGTG	157827	96	H	12	H2_C5	Norm.bc	10pM	H2	blank
CGCCAA	ATCACG	147	96	H	12	H2_C5	eAg	NA	H2	blank
CGCCAA	CAGATC	3113	96	H	12	H2_C5	Norm.bc	0.5pM	H2	blank
CGCCAA	CGATGT	454	96	H	12	H2_C5	sAg	NA	H2	blank
CGCCAA	GCCAAT	15943	96	H	12	H2_C5	Norm.bc	1pM	H2	blank
ACTGCT	ACAGTG	137816	84	G	12	H3_C5	Norm.bc	10pM	H3	blank
ACTGCT	ATCACG	104	84	G	12	H3_C5	eAg	NA	H3	blank
ACTGCT	CAGATC	2674	84	G	12	H3_C5	Norm.bc	0.5pM	H3	blank
ACTGCT	CGATGT	445	84	G	12	H3_C5	sAg	NA	H3	blank
ACTGCT	GCCAAT	13636	84	G	12	H3_C5	Norm.bc	1pM	H3	blank
CGCCAA	ACAGTG	98746	96	H	12	H3_C5	Norm.bc	10pM	H3	blank
CGCCAA	ATCACG	67	96	H	12	H3_C5	eAg	NA	H3	blank
CGCCAA	CAGATC	1962	96	H	12	H3_C5	Norm.bc	0.5pM	H3	blank
CGCCAA	CGATGT	339	96	H	12	H3_C5	sAg	NA	H3	blank
CGCCAA	GCCAAT	9894	96	H	12	H3_C5	Norm.bc	1pM	H3	blank
ACTGCT	ACAGTG	207971	84	G	12	H4_C5	Norm.bc	10pM	H4	blank
ACTGCT	ATCACG	139	84	G	12	H4_C5	eAg	NA	H4	blank
ACTGCT	CAGATC	3952	84	G	12	H4_C5	Norm.bc	0.5pM	H4	blank
ACTGCT	CGATGT	493	84	G	12	H4_C5	sAg	NA	H4	blank
ACTGCT	GCCAAT	20712	84	G	12	H4_C5	Norm.bc	1pM	H4	blank
CGCCAA	ACAGTG	171343	96	H	12	H4_C5	Norm.bc	10pM	H4	blank
CGCCAA	ATCACG	104	96	H	12	H4_C5	eAg	NA	H4	blank
CGCCAA	CAGATC	3281	96	H	12	H4_C5	Norm.bc	0.5pM	H4	blank
CGCCAA	CGATGT	414	96	H	12	H4_C5	sAg	NA	H4	blank
CGCCAA	GCCAAT	16918	96	H	12	H4_C5	Norm.bc	1pM	H4	blank
ACTGCT	ACAGTG	239895	84	G	12	H5_C5	Norm.bc	10pM	H5	blank
ACTGCT	ATCACG	115	84	G	12	H5_C5	eAg	NA	H5	blank
ACTGCT	CAGATC	4561	84	G	12	H5_C5	Norm.bc	0.5pM	H5	blank
ACTGCT	CGATGT	561	84	G	12	H5_C5	sAg	NA	H5	blank
ACTGCT	GCCAAT	23939	84	G	12	H5_C5	Norm.bc	1pM	H5	blank
CGCCAA	ACAGTG	243450	96	H	12	H5_C5	Norm.bc	10pM	H5	blank
CGCCAA	ATCACG	127	96	H	12	H5_C5	eAg	NA	H5	blank
CGCCAA	CAGATC	4822	96	H	12	H5_C5	Norm.bc	0.5pM	H5	blank
CGCCAA	CGATGT	588	96	H	12	H5_C5	sAg	NA	H5	blank
CGCCAA	GCCAAT	24329	96	H	12	H5_C5	Norm.bc	1pM	H5	blank
ACTGCT	ACAGTG	222231	84	G	12	H6_C5	Norm.bc	10pM	H6	blank
ACTGCT	ATCACG	126	84	G	12	H6_C5	eAg	NA	H6	blank
ACTGCT	CAGATC	4244	84	G	12	H6_C5	Norm.bc	0.5pM	H6	blank
ACTGCT	CGATGT	496	84	G	12	H6_C5	sAg	NA	H6	blank
ACTGCT	GCCAAT	22224	84	G	12	H6_C5	Norm.bc	1pM	H6	blank
CGCCAA	ACAGTG	225576	96	H	12	H6_C5	Norm.bc	10pM	H6	blank
CGCCAA	ATCACG	95	96	H	12	H6_C5	eAg	NA	H6	blank
CGCCAA	CAGATC	4284	96	H	12	H6_C5	Norm.bc	0.5pM	H6	blank
CGCCAA	CGATGT	518	96	H	12	H6_C5	sAg	NA	H6	blank
CGCCAA	GCCAAT	22486	96	H	12	H6_C5	Norm.bc	1pM	H6	blank
ACTGCT	ACAGTG	139006	84	G	12	H7_C5	Norm.bc	10pM	H7	blank
ACTGCT	ATCACG	75	84	G	12	H7_C5	eAg	NA	H7	blank
ACTGCT	CAGATC	2736	84	G	12	H7_C5	Norm.bc	0.5pM	H7	blank
ACTGCT	CGATGT	335	84	G	12	H7_C5	sAg	NA	H7	blank
ACTGCT	GCCAAT	13659	84	G	12	H7_C5	Norm.bc	1pM	H7	blank
CGCCAA	ACAGTG	168219	96	H	12	H7_C5	Norm.bc	10pM	H7	blank
CGCCAA	ATCACG	94	96	H	12	H7_C5	eAg	NA	H7	blank
CGCCAA	CAGATC	3243	96	H	12	H7_C5	Norm.bc	0.5pM	H7	blank
CGCCAA	CGATGT	437	96	H	12	H7_C5	sAg	NA	H7	blank
CGCCAA	GCCAAT	16733	96	H	12	H7_C5	Norm.bc	1pM	H7	blank
ACCTTA	ACAGTG	216602	95	H	11	H8_C4	Norm.bc	10pM	H8	blank
ACCTTA	ATCACG	156	95	H	11	H8_C4	eAg	NA	H8	blank
ACCTTA	CAGATC	4170	95	H	11	H8_C4	Norm.bc	0.5pM	H8	blank
ACCTTA	CGATGT	630	95	H	11	H8_C4	sAg	NA	H8	blank
ACCTTA	GCCAAT	21705	95	H	11	H8_C4	Norm.bc	1pM	H8	blank
ACTGCT	ACAGTG	123338	84	G	12	H8_C5	Norm.bc	10pM	H8	blank
ACTGCT	ATCACG	60	84	G	12	H8_C5	eAg	NA	H8	blank
ACTGCT	CAGATC	2386	84	G	12	H8_C5	Norm.bc	0.5pM	H8	blank
ACTGCT	CGATGT	291	84	G	12	H8_C5	sAg	NA	H8	blank
ACTGCT	GCCAAT	11841	84	G	12	H8_C5	Norm.bc	1pM	H8	blank
CGCCAA	ACAGTG	165716	96	H	12	H8_C5	Norm.bc	10pM	H8	blank
CGCCAA	ATCACG	94	96	H	12	H8_C5	eAg	NA	H8	blank
CGCCAA	CAGATC	3256	96	H	12	H8_C5	Norm.bc	0.5pM	H8	blank
CGCCAA	CGATGT	561	96	H	12	H8_C5	sAg	NA	H8	blank
CGCCAA	GCCAAT	16573	96	H	12	H8_C5	Norm.bc	1pM	H8	blank
GTTACC	ACAGTG	69030	83	G	11	H8_C4	Norm.bc	10pM	H8	blank
GTTACC	ATCACG	52	83	G	11	H8_C4	eAg	NA	H8	blank
GTTACC	CAGATC	1302	83	G	11	H8_C4	Norm.bc	0.5pM	H8	blank
GTTACC	CGATGT	225	83	G	11	H8_C4	sAg	NA	H8	blank
GTTACC	GCCAAT	6539	83	G	11	H8_C4	Norm.bc	1pM	H8	blank
ACCTTA	ACAGTG	208211	95	H	11	H9_C4	Norm.bc	10pM	H9	blank
ACCTTA	ATCACG	153	95	H	11	H9_C4	eAg	NA	H9	blank
ACCTTA	CAGATC	3928	95	H	11	H9_C4	Norm.bc	0.5pM	H9	blank
ACCTTA	CGATGT	615	95	H	11	H9_C4	sAg	NA	H9	blank
ACCTTA	GCCAAT	20392	95	H	11	H9_C4	Norm.bc	1pM	H9	blank
ACTGCT	ACAGTG	162047	84	G	12	H9_C5	Norm.bc	10pM	H9	blank
ACTGCT	ATCACG	74	84	G	12	H9_C5	eAg	NA	H9	blank
ACTGCT	CAGATC	3149	84	G	12	H9_C5	Norm.bc	0.5pM	H9	blank
ACTGCT	CGATGT	392	84	G	12	H9_C5	sAg	NA	H9	blank
ACTGCT	GCCAAT	15685	84	G	12	H9_C5	Norm.bc	1pM	H9	blank
CAGTAA	ACAGTG	169727	82	G	10	H9_C3	Norm.bc	10pM	H9	blank
CAGTAA	ATCACG	184	82	G	10	H9_C3	eAg	NA	H9	blank
CAGTAA	CAGATC	3184	82	G	10	H9_C3	Norm.bc	0.5pM	H9	blank
CAGTAA	CGATGT	507	82	G	10	H9_C3	sAg	NA	H9	blank
CAGTAA	GCCAAT	16780	82	G	10	H9_C3	Norm.bc	1pM	H9	blank
CGCCAA	ACAGTG	205780	96	H	12	H9_C5	Norm.bc	10pM	H9	blank
CGCCAA	ATCACG	104	96	H	12	H9_C5	eAg	NA	H9	blank
CGCCAA	CAGATC	3869	96	H	12	H9_C5	Norm.bc	0.5pM	H9	blank
CGCCAA	CGATGT	435	96	H	12	H9_C5	sAg	NA	H9	blank
CGCCAA	GCCAAT	20540	96	H	12	H9_C5	Norm.bc	1pM	H9	blank
CTATGG	ACAGTG	180764	94	H	10	H9_C3	Norm.bc	10pM	H9	blank
CTATGG	ATCACG	127	94	H	10	H9_C3	eAg	NA	H9	blank
CTATGG	CAGATC	3518	94	H	10	H9_C3	Norm.bc	0.5pM	H9	blank
CTATGG	CGATGT	480	94	H	10	H9_C3	sAg	NA	H9	blank
CTATGG	GCCAAT	17708	94	H	10	H9_C3	Norm.bc	1pM	H9	blank
GTTACC	ACAGTG	65091	83	G	11	H9_C4	Norm.bc	10pM	H9	blank
GTTACC	ATCACG	56	83	G	11	H9_C4	eAg	NA	H9	blank
GTTACC	CAGATC	1206	83	G	11	H9_C4	Norm.bc	0.5pM	H9	blank
GTTACC	CGATGT	216	83	G	11	H9_C4	sAg	NA	H9	blank
GTTACC	GCCAAT	6174	83	G	11	H9_C4	Norm.bc	1pM	H9	blank
ACCTTA	ACAGTG	180793	95	H	11	H10_C4	Norm.bc	10pM	H10	blank
ACCTTA	ATCACG	184	95	H	11	H10_C4	eAg	NA	H10	blank
ACCTTA	CAGATC	3504	95	H	11	H10_C4	Norm.bc	0.5pM	H10	blank
ACCTTA	CGATGT	696	95	H	11	H10_C4	sAg	NA	H10	blank
ACCTTA	GCCAAT	17806	95	H	11	H10_C4	Norm.bc	1pM	H10	blank
ACTGCT	ACAGTG	165941	84	G	12	H10_C5	Norm.bc	10pM	H10	blank
ACTGCT	ATCACG	89	84	G	12	H10_C5	eAg	NA	H10	blank
ACTGCT	CAGATC	3160	84	G	12	H10_C5	Norm.bc	0.5pM	H10	blank
ACTGCT	CGATGT	410	84	G	12	H10_C5	sAg	NA	H10	blank
ACTGCT	GCCAAT	16681	84	G	12	H10_C5	Norm.bc	1pM	H10	blank
CAGTAA	ACAGTG	185717	82	G	10	H10_C3	Norm.bc	10pM	H10	blank
CAGTAA	ATCACG	143	82	G	10	H10_C3	eAg	NA	H10	blank
CAGTAA	CAGATC	3629	82	G	10	H10_C3	Norm.bc	0.5pM	H10	blank
CAGTAA	CGATGT	582	82	G	10	H10_C3	sAg	NA	H10	blank
CAGTAA	GCCAAT	18463	82	G	10	H10_C3	Norm.bc	1pM	H10	blank
CGCCAA	ACAGTG	216667	96	H	12	H10_C5	Norm.bc	10pM	H10	blank
CGCCAA	ATCACG	116	96	H	12	H10_C5	eAg	NA	H10	blank
CGCCAA	CAGATC	4123	96	H	12	H10_C5	Norm.bc	0.5pM	H10	blank
CGCCAA	CGATGT	503	96	H	12	H10_C5	sAg	NA	H10	blank
CGCCAA	GCCAAT	21312	96	H	12	H10_C5	Norm.bc	1pM	H10	blank
CTATGG	ACAGTG	200694	94	H	10	H10_C3	Norm.bc	10pM	H10	blank
CTATGG	ATCACG	149	94	H	10	H10_C3	eAg	NA	H10	blank
CTATGG	CAGATC	3862	94	H	10	H10_C3	Norm.bc	0.5pM	H10	blank
CTATGG	CGATGT	597	94	H	10	H10_C3	sAg	NA	H10	blank
CTATGG	GCCAAT	20022	94	H	10	H10_C3	Norm.bc	1pM	H10	blank
GTTACC	ACAGTG	68707	83	G	11	H10_C4	Norm.bc	10pM	H10	blank
GTTACC	ATCACG	69	83	G	11	H10_C4	eAg	NA	H10	blank
GTTACC	CAGATC	1276	83	G	11	H10_C4	Norm.bc	0.5pM	H10	blank
GTTACC	CGATGT	271	83	G	11	H10_C4	sAg	NA	H10	blank
GTTACC	GCCAAT	6776	83	G	11	H10_C4	Norm.bc	1pM	H10	blank
ACCTTA	ACAGTG	231069	95	H	11	H11_C4	Norm.bc	10pM	H11	blank
ACCTTA	ATCACG	180	95	H	11	H11_C4	eAg	NA	H11	blank
ACCTTA	CAGATC	4355	95	H	11	H11_C4	Norm.bc	0.5pM	H11	blank
ACCTTA	CGATGT	718	95	H	11	H11_C4	sAg	NA	H11	blank
ACCTTA	GCCAAT	22870	95	H	11	H11_C4	Norm.bc	1pM	H11	blank
ACTGCT	ACAGTG	141463	84	G	12	H11_C5	Norm.bc	10pM	H11	blank
ACTGCT	ATCACG	92	84	G	12	H11_C5	eAg	NA	H11	blank
ACTGCT	CAGATC	2678	84	G	12	H11_C5	Norm.bc	0.5pM	H11	blank
ACTGCT	CGATGT	360	84	G	12	H11_C5	sAg	NA	H11	blank
ACTGCT	GCCAAT	14055	84	G	12	H11_C5	Norm.bc	1pM	H11	blank
CAGTAA	ACAGTG	159325	82	G	10	H11_C3	Norm.bc	10pM	H11	blank
CAGTAA	ATCACG	125	82	G	10	H11_C3	eAg	NA	H11	blank
CAGTAA	CAGATC	2973	82	G	10	H11_C3	Norm.bc	0.5pM	H11	blank
CAGTAA	CGATGT	556	82	G	10	H11_C3	sAg	NA	H11	blank
CAGTAA	GCCAAT	15738	82	G	10	H11_C3	Norm.bc	1pM	H11	blank
CGCCAA	ACAGTG	100135	96	H	12	H11_C5	Norm.bc	10pM	H11	blank
CGCCAA	ATCACG	74	96	H	12	H11_C5	eAg	NA	H11	blank
CGCCAA	CAGATC	1951	96	H	12	H11_C5	Norm.bc	0.5pM	H11	blank
CGCCAA	CGATGT	239	96	H	12	H11_C5	sAg	NA	H11	blank
CGCCAA	GCCAAT	9861	96	H	12	H11_C5	Norm.bc	1pM	H11	blank
CTATGG	ACAGTG	162058	94	H	10	H11_C3	Norm.bc	10pM	H11	blank
CTATGG	ATCACG	122	94	H	10	H11_C3	eAg	NA	H11	blank
CTATGG	CAGATC	3167	94	H	10	H11_C3	Norm.bc	0.5pM	H11	blank
CTATGG	CGATGT	559	94	H	10	H11_C3	sAg	NA	H11	blank
CTATGG	GCCAAT	15969	94	H	10	H11_C3	Norm.bc	1pM	H11	blank
GTTACC	ACAGTG	55481	83	G	11	H11_C4	Norm.bc	10pM	H11	blank
GTTACC	ATCACG	54	83	G	11	H11_C4	eAg	NA	H11	blank
GTTACC	CAGATC	1037	83	G	11	H11_C4	Norm.bc	0.5pM	H11	blank
GTTACC	CGATGT	197	83	G	11	H11_C4	sAg	NA	H11	blank
GTTACC	GCCAAT	5220	83	G	11	H11_C4	Norm.bc	1pM	H11	blank
AAGGAG	ACAGTG	325378	51	E	3	H12_C2	Norm.bc	10pM	H12	blank
AAGGAG	ATCACG	246	51	E	3	H12_C2	eAg	NA	H12	blank
AAGGAG	CAGATC	6279	51	E	3	H12_C2	Norm.bc	0.5pM	H12	blank
AAGGAG	CGATGT	818	51	E	3	H12_C2	sAg	NA	H12	blank
AAGGAG	GCCAAT	32307	51	E	3	H12_C2	Norm.bc	1pM	H12	blank
CAAGTT	ACAGTG	334873	64	F	4	H12_C3	Norm.bc	10pM	H12	blank
CAAGTT	ATCACG	236	64	F	4	H12_C3	eAg	NA	H12	blank
CAAGTT	CAGATC	6530	64	F	4	H12_C3	Norm.bc	0.5pM	H12	blank
CAAGTT	CGATGT	814	64	F	4	H12_C3	sAg	NA	H12	blank
CAAGTT	GCCAAT	33038	64	F	4	H12_C3	Norm.bc	1pM	H12	blank
CTATCT	ACAGTG	382765	52	E	4	H12_C3	Norm.bc	10pM	H12	blank
CTATCT	ATCACG	253	52	E	4	H12_C3	eAg	NA	H12	blank
CTATCT	CAGATC	7420	52	E	4	H12_C3	Norm.bc	0.5pM	H12	blank
CTATCT	CGATGT	913	52	E	4	H12_C3	sAg	NA	H12	blank
CTATCT	GCCAAT	38509	52	E	4	H12_C3	Norm.bc	1pM	H12	blank
TTGCGG	ACAGTG	155694	63	F	3	H12_C2	Norm.bc	10pM	H12	blank
TTGCGG	ATCACG	96	63	F	3	H12_C2	eAg	NA	H12	blank
TTGCGG	CAGATC	2908	63	F	3	H12_C2	Norm.bc	0.5pM	H12	blank
TTGCGG	CGATGT	413	63	F	3	H12_C2	sAg	NA	H12	blank
TTGCGG	GCCAAT	15601	63	F	3	H12_C2	Norm.bc	1pM	H12	blank
AACGGA	ACAGTG	152911	61	F	1	25	Norm.bc	10pM	H1	NA
AACGGA	ATCACG	149	61	F	1	25	eAg	NA	H1	NA
AACGGA	CAGATC	3025	61	F	1	25	Norm.bc	0.5pM	H1	NA
AACGGA	CGATGT	382	61	F	1	25	sAg	NA	H1	NA
AACGGA	GCCAAT	15287	61	F	1	25	Norm.bc	1pM	H1	NA
AAGGAG	ACAGTG	170066	51	E	3	27	Norm.bc	10pM	H1	NA
AAGGAG	ATCACG	111	51	E	3	27	eAg	NA	H1	NA
AAGGAG	CAGATC	3274	51	E	3	27	Norm.bc	0.5pM	H1	NA
AAGGAG	CGATGT	358	51	E	3	27	sAg	NA	H1	NA
AAGGAG	GCCAAT	16932	51	E	3	27	Norm.bc	1pM	H1	NA
AATCGT	ACAGTG	93964	68	F	8	32	Norm.bc	10pM	H1	NA
AATCGT	ATCACG	812	68	F	8	32	eAg	NA	H1	NA
AATCGT	CAGATC	1810	68	F	8	32	Norm.bc	0.5pM	H1	NA
AATCGT	CGATGT	2421	68	F	8	32	sAg	NA	H1	NA
AATCGT	GCCAAT	9137	68	F	8	32	Norm.bc	1pM	H1	NA
AATTCC	ACAGTG	114775	71	F	11	35	Norm.bc	10pM	H1	NA
AATTCC	ATCACG	160	71	F	11	35	eAg	NA	H1	NA
AATTCC	CAGATC	2210	71	F	11	35	Norm.bc	0.5pM	H1	NA
AATTCC	CGATGT	324	71	F	11	35	sAg	NA	H1	NA
AATTCC	GCCAAT	11427	71	F	11	35	Norm.bc	1pM	H1	NA
ACAGTG	ACAGTG	198239	5	A	5	5	Norm.bc	10pM	H1	NA
ACAGTG	ATCACG	168	5	A	5	5	eAg	NA	H1	NA
ACAGTG	CAGATC	3813	5	A	5	5	Norm.bc	0.5pM	H1	NA
ACAGTG	CGATGT	396	5	A	5	5	sAg	NA	H1	NA
ACAGTG	GCCAAT	19621	5	A	5	5	Norm.bc	1pM	H1	NA
ACGAGG	ACAGTG	164074	67	F	7	31	Norm.bc	10pM	H1	NA
ACGAGG	ATCACG	93	67	F	7	31	eAg	NA	H1	NA
ACGAGG	CAGATC	3142	67	F	7	31	Norm.bc	0.5pM	H1	NA
ACGAGG	CGATGT	264	67	F	7	31	sAg	NA	H1	NA
ACGAGG	GCCAAT	16270	67	F	7	31	Norm.bc	1pM	H1	NA
ACTGAT	ACAGTG	201365	25	C	1	13	Norm.bc	10pM	H1	NA
ACTGAT	ATCACG	275	25	C	1	13	eAg	NA	H1	NA
ACTGAT	CAGATC	3948	25	C	1	13	Norm.bc	0.5pM	H1	NA
ACTGAT	CGATGT	758	25	C	1	13	sAg	NA	H1	NA
ACTGAT	GCCAAT	19911	25	C	1	13	Norm.bc	1pM	H1	NA
ACTTGA	ACAGTG	226350	8	A	8	8	Norm.bc	10pM	H1	NA
ACTTGA	ATCACG	21627	8	A	8	8	eAg	NA	H1	NA
ACTTGA	CAGATC	4353	8	A	8	8	Norm.bc	0.5pM	H1	NA
ACTTGA	CGATGT	1130	8	A	8	8	sAg	NA	H1	NA
ACTTGA	GCCAAT	22342	8	A	8	8	Norm.bc	1pM	H1	NA
AGACCA	ACAGTG	152584	70	F	10	34	Norm.bc	10pM	H1	NA
AGACCA	ATCACG	122	70	F	10	34	eAg	NA	H1	NA
AGACCA	CAGATC	2882	70	F	10	34	Norm.bc	0.5pM	H1	NA
AGACCA	CGATGT	317	70	F	10	34	sAg	NA	H1	NA
AGACCA	GCCAAT	14711	70	F	10	34	Norm.bc	1pM	H1	NA
AGATGT	ACAGTG	148760	72	F	12	36	Norm.bc	10pM	H1	NA
AGATGT	ATCACG	130	72	F	12	36	eAg	NA	H1	NA
AGATGT	CAGATC	2921	72	F	12	36	Norm.bc	0.5pM	H1	NA
AGATGT	CGATGT	438	72	F	12	36	sAg	NA	H1	NA
AGATGT	GCCAAT	15254	72	F	12	36	Norm.bc	1pM	H1	NA
AGCACC	ACAGTG	193122	55	E	7	31	Norm.bc	10pM	H1	NA
AGCACC	ATCACG	105	55	E	7	31	eAg	NA	H1	NA
AGCACC	CAGATC	3750	55	E	7	31	Norm.bc	0.5pM	H1	NA
AGCACC	CGATGT	316	55	E	7	31	sAg	NA	H1	NA
AGCACC	GCCAAT	19358	55	E	7	31	Norm.bc	1pM	H1	NA
AGTCAA	ACAGTG	108173	13	B	1	1	Norm.bc	10pM	H1	NA
AGTCAA	ATCACG	50	13	B	1	1	eAg	NA	H1	NA
AGTCAA	CAGATC	2072	13	B	1	1	Norm.bc	0.5pM	H1	NA
AGTCAA	CGATGT	160	13	B	1	1	sAg	NA	H1	NA
AGTCAA	GCCAAT	10810	13	B	1	1	Norm.bc	1pM	H1	NA
AGTCTC	ACAGTG	187567	78	G	6	42	Norm.bc	10pM	H1	NA
AGTCTC	ATCACG	312	78	G	6	42	eAg	NA	H1	NA
AGTCTC	CAGATC	3622	78	G	6	42	Norm.bc	0.5pM	H1	NA
AGTCTC	CGATGT	84032	78	G	6	42	sAg	NA	H1	NA
AGTCTC	GCCAAT	18556	78	G	6	42	Norm.bc	1pM	H1	NA
AGTTCC	ACAGTG	157564	14	B	2	2	Norm.bc	10pM	H1	NA
AGTTCC	ATCACG	136	14	B	2	2	eAg	NA	H1	NA
AGTTCC	CAGATC	3064	14	B	2	2	Norm.bc	0.5pM	H1	NA
AGTTCC	CGATGT	293	14	B	2	2	sAg	NA	H1	NA
AGTTCC	GCCAAT	15617	14	B	2	2	Norm.bc	1pM	H1	NA
ATAGAT	ACAGTG	158041	74	G	2	38	Norm.bc	10pM	H1	NA
ATAGAT	ATCACG	159	74	G	2	38	eAg	NA	H1	NA
ATAGAT	CAGATC	3127	74	G	2	38	Norm.bc	0.5pM	H1	NA
ATAGAT	CGATGT	606	74	G	2	38	sAg	NA	H1	NA
ATAGAT	GCCAAT	15490	74	G	2	38	Norm.bc	1pM	H1	NA
ATCACG	ACAGTG	114282	1	A	1	1	Norm.bc	10pM	H1	NA
ATCACG	ATCACG	46	1	A	1	1	eAg	NA	H1	NA
ATCACG	CAGATC	2193	1	A	1	1	Norm.bc	0.5pM	H1	NA
ATCACG	CGATGT	163	1	A	1	1	sAg	NA	H1	NA
ATCACG	GCCAAT	11342	1	A	1	1	Norm.bc	1pM	H1	NA
ATCCAA	ACAGTG	115464	86	H	2	38	Norm.bc	10pM	H1	NA
ATCCAA	ATCACG	105	86	H	2	38	eAg	NA	H1	NA
ATCCAA	CAGATC	2256	86	H	2	38	Norm.bc	0.5pM	H1	NA
ATCCAA	CGATGT	380	86	H	2	38	sAg	NA	H1	NA
ATCCAA	GCCAAT	11528	86	H	2	38	Norm.bc	1pM	H1	NA
ATGAGC	ACAGTG	148317	26	C	2	14	Norm.bc	10pM	H1	NA
ATGAGC	ATCACG	86	26	C	2	14	eAg	NA	H1	NA
ATGAGC	CAGATC	2721	26	C	2	14	Norm.bc	0.5pM	H1	NA
ATGAGC	CGATGT	266	26	C	2	14	sAg	NA	H1	NA
ATGAGC	GCCAAT	14457	26	C	2	14	Norm.bc	1pM	H1	NA
ATGGCA	ACAGTG	83924	50	E	2	26	Norm.bc	10pM	H1	NA
ATGGCA	ATCACG	229	50	E	2	26	eAg	NA	H1	NA
ATGGCA	CAGATC	1630	50	E	2	26	Norm.bc	0.5pM	H1	NA
ATGGCA	CGATGT	383	50	E	2	26	sAg	NA	H1	NA
ATGGCA	GCCAAT	8279	50	E	2	26	Norm.bc	1pM	H1	NA
ATGTCA	ACAGTG	139156	15	B	3	3	Norm.bc	10pM	H1	NA
ATGTCA	ATCACG	589	15	B	3	3	eAg	NA	H1	NA
ATGTCA	CAGATC	2634	15	B	3	3	Norm.bc	0.5pM	H1	NA
ATGTCA	CGATGT	2059	15	B	3	3	sAg	NA	H1	NA
ATGTCA	GCCAAT	13699	15	B	3	3	Norm.bc	1pM	H1	NA
ATTCCT	ACAGTG	146240	27	C	3	15	Norm.bc	10pM	H1	NA
ATTCCT	ATCACG	177	27	C	3	15	eAg	NA	H1	NA
ATTCCT	CAGATC	2820	27	C	3	15	Norm.bc	0.5pM	H1	NA
ATTCCT	CGATGT	415	27	C	3	15	sAg	NA	H1	NA
ATTCCT	GCCAAT	14303	27	C	3	15	Norm.bc	1pM	H1	NA
CAAAAG	ACAGTG	165213	28	C	4	16	Norm.bc	10pM	H1	NA
CAAAAG	ATCACG	1642	28	C	4	16	eAg	NA	H1	NA
CAAAAG	CAGATC	3086	28	C	4	16	Norm.bc	0.5pM	H1	NA
CAAAAG	CGATGT	1296	28	C	4	16	sAg	NA	H1	NA
CAAAAG	GCCAAT	16182	28	C	4	16	Norm.bc	1pM	H1	NA
CAACTA	ACAGTG	160634	29	C	5	17	Norm.bc	10pM	H1	NA
CAACTA	ATCACG	316	29	C	5	17	eAg	NA	H1	NA
CAACTA	CAGATC	3065	29	C	5	17	Norm.bc	0.5pM	H1	NA
CAACTA	CGATGT	48954	29	C	5	17	sAg	NA	H1	NA
CAACTA	GCCAAT	15974	29	C	5	17	Norm.bc	1pM	H1	NA
CAAGTT	ACAGTG	82291	64	F	4	28	Norm.bc	10pM	H1	NA
CAAGTT	ATCACG	85	64	F	4	28	eAg	NA	H1	NA
CAAGTT	CAGATC	1612	64	F	4	28	Norm.bc	0.5pM	H1	NA
CAAGTT	CGATGT	224	64	F	4	28	sAg	NA	H1	NA
CAAGTT	GCCAAT	8237	64	F	4	28	Norm.bc	1pM	H1	NA
CACCGG	ACAGTG	153219	30	C	6	18	Norm.bc	10pM	H1	NA
CACCGG	ATCACG	147	30	C	6	18	eAg	NA	H1	NA
CACCGG	CAGATC	2946	30	C	6	18	Norm.bc	0.5pM	H1	NA
CACCGG	CGATGT	607	30	C	6	18	sAg	NA	H1	NA
CACCGG	GCCAAT	15234	30	C	6	18	Norm.bc	1pM	H1	NA
CACGAT	ACAGTG	191762	31	C	7	19	Norm.bc	10pM	H1	NA
CACGAT	ATCACG	220	31	C	7	19	eAg	NA	H1	NA
CACGAT	CAGATC	3687	31	C	7	19	Norm.bc	0.5pM	H1	NA
CACGAT	CGATGT	857	31	C	7	19	sAg	NA	H1	NA
CACGAT	GCCAAT	18823	31	C	7	19	Norm.bc	1pM	H1	NA
CACTCA	ACAGTG	75144	32	C	8	20	Norm.bc	10pM	H1	NA
CACTCA	ATCACG	67	32	C	8	20	eAg	NA	H1	NA
CACTCA	CAGATC	1426	32	C	8	20	Norm.bc	0.5pM	H1	NA
CACTCA	CGATGT	234	32	C	8	20	sAg	NA	H1	NA
CACTCA	GCCAAT	7437	32	C	8	20	Norm.bc	1pM	H1	NA
CAGATC	ACAGTG	254200	7	A	7	7	Norm.bc	10pM	H1	NA
CAGATC	ATCACG	134	7	A	7	7	eAg	NA	H1	NA
CAGATC	CAGATC	4938	7	A	7	7	Norm.bc	0.5pM	H1	NA
CAGATC	CGATGT	440	7	A	7	7	sAg	NA	H1	NA
CAGATC	GCCAAT	25370	7	A	7	7	Norm.bc	1pM	H1	NA
CAGGCG	ACAGTG	89345	33	C	9	21	Norm.bc	10pM	H1	NA
CAGGCG	ATCACG	74	33	C	9	21	eAg	NA	H1	NA
CAGGCG	CAGATC	1781	33	C	9	21	Norm.bc	0.5pM	H1	NA
CAGGCG	CGATGT	216	33	C	9	21	sAg	NA	H1	NA
CAGGCG	GCCAAT	8916	33	C	9	21	Norm.bc	1pM	H1	NA
CATGGC	ACAGTG	174747	34	C	10	22	Norm.bc	10pM	H1	NA
CATGGC	ATCACG	137	34	C	10	22	eAg	NA	H1	NA
CATGGC	CAGATC	3356	34	C	10	22	Norm.bc	0.5pM	H1	NA
CATGGC	CGATGT	353	34	C	10	22	sAg	NA	H1	NA
CATGGC	GCCAAT	17167	34	C	10	22	Norm.bc	1pM	H1	NA
CATTTT	ACAGTG	168275	35	C	11	23	Norm.bc	10pM	H1	NA
CATTTT	ATCACG	28735	35	C	11	23	eAg	NA	H1	NA
CATTTT	CAGATC	3230	35	C	11	23	Norm.bc	0.5pM	H1	NA
CATTTT	CGATGT	90423	35	C	11	23	sAg	NA	H1	NA
CATTTT	GCCAAT	16724	35	C	11	23	Norm.bc	1pM	H1	NA
CCAACA	ACAGTG	143870	36	C	12	24	Norm.bc	10pM	H1	NA
CCAACA	ATCACG	270	36	C	12	24	eAg	NA	H1	NA
CCAACA	CAGATC	2816	36	C	12	24	Norm.bc	0.5pM	H1	NA
CCAACA	CGATGT	503	36	C	12	24	sAg	NA	H1	NA
CCAACA	GCCAAT	14245	36	C	12	24	Norm.bc	1pM	H1	NA
CCGTCC	ACAGTG	219529	16	B	4	4	Norm.bc	10pM	H1	NA
CCGTCC	ATCACG	129	16	B	4	4	eAg	NA	H1	NA
CCGTCC	CAGATC	4233	16	B	4	4	Norm.bc	0.5pM	H1	NA
CCGTCC	CGATGT	346	16	B	4	4	sAg	NA	H1	NA
CCGTCC	GCCAAT	21533	16	B	4	4	Norm.bc	1pM	H1	NA
CCTATT	ACAGTG	192015	76	G	4	40	Norm.bc	10pM	H1	NA
CCTATT	ATCACG	110	76	G	4	40	eAg	NA	H1	NA
CCTATT	CAGATC	3757	76	G	4	40	Norm.bc	0.5pM	H1	NA
CCTATT	CGATGT	343	76	G	4	40	sAg	NA	H1	NA
CCTATT	GCCAAT	19154	76	G	4	40	Norm.bc	1pM	H1	NA
CGATGT	ACAGTG	157905	2	A	2	2	Norm.bc	10pM	H1	NA
CGATGT	ATCACG	93	2	A	2	2	eAg	NA	H1	NA
CGATGT	CAGATC	3013	2	A	2	2	Norm.bc	0.5pM	H1	NA
CGATGT	CGATGT	225	2	A	2	2	sAg	NA	H1	NA
CGATGT	GCCAAT	15579	2	A	2	2	Norm.bc	1pM	H1	NA
CGCGGC	ACAGTG	109528	59	E	11	35	Norm.bc	10pM	H1	NA
CGCGGC	ATCACG	191	59	E	11	35	eAg	NA	H1	NA
CGCGGC	CAGATC	2103	59	E	11	35	Norm.bc	0.5pM	H1	NA
CGCGGC	CGATGT	366	59	E	11	35	sAg	NA	H1	NA
CGCGGC	GCCAAT	10795	59	E	11	35	Norm.bc	1pM	H1	NA
CGGAAT	ACAGTG	130048	37	D	1	13	Norm.bc	10pM	H1	NA
CGGAAT	ATCACG	142	37	D	1	13	eAg	NA	H1	NA
CGGAAT	CAGATC	2526	37	D	1	13	Norm.bc	0.5pM	H1	NA
CGGAAT	CGATGT	443	37	D	1	13	sAg	NA	H1	NA
CGGAAT	GCCAAT	12788	37	D	1	13	Norm.bc	1pM	H1	NA
CGTACG	ACAGTG	148657	22	B	10	10	Norm.bc	10pM	H1	NA
CGTACG	ATCACG	770	22	B	10	10	eAg	NA	H1	NA
CGTACG	CAGATC	2971	22	B	10	10	Norm.bc	0.5pM	H1	NA
CGTACG	CGATGT	332	22	B	10	10	sAg	NA	H1	NA
CGTACG	GCCAAT	15044	22	B	10	10	Norm.bc	1pM	H1	NA
CGTTAG	ACAGTG	183216	89	H	5	41	Norm.bc	10pM	H1	NA
CGTTAG	ATCACG	1635	89	H	5	41	eAg	NA	H1	NA
CGTTAG	CAGATC	3500	89	H	5	41	Norm.bc	0.5pM	H1	NA
CGTTAG	CGATGT	927	89	H	5	41	sAg	NA	H1	NA
CGTTAG	GCCAAT	18051	89	H	5	41	Norm.bc	1pM	H1	NA
CTAAGG	ACAGTG	159129	85	H	1	37	Norm.bc	10pM	H1	NA
CTAAGG	ATCACG	131	85	H	1	37	eAg	NA	H1	NA
CTAAGG	CAGATC	3125	85	H	1	37	Norm.bc	0.5pM	H1	NA
CTAAGG	CGATGT	800	85	H	1	37	sAg	NA	H1	NA
CTAAGG	GCCAAT	15980	85	H	1	37	Norm.bc	1pM	H1	NA
CTAGCT	ACAGTG	140011	38	D	2	14	Norm.bc	10pM	H1	NA
CTAGCT	ATCACG	113	38	D	2	14	eAg	NA	H1	NA
CTAGCT	CAGATC	2763	38	D	2	14	Norm.bc	0.5pM	H1	NA
CTAGCT	CGATGT	285	38	D	2	14	sAg	NA	H1	NA
CTAGCT	GCCAAT	14073	38	D	2	14	Norm.bc	1pM	H1	NA
CTATAC	ACAGTG	176674	39	D	3	15	Norm.bc	10pM	H1	NA
CTATAC	ATCACG	285	39	D	3	15	eAg	NA	H1	NA
CTATAC	CAGATC	3335	39	D	3	15	Norm.bc	0.5pM	H1	NA
CTATAC	CGATGT	527	39	D	3	15	sAg	NA	H1	NA
CTATAC	GCCAAT	17493	39	D	3	15	Norm.bc	1pM	H1	NA
CTATCT	ACAGTG	215137	52	E	4	28	Norm.bc	10pM	H1	NA
CTATCT	ATCACG	178	52	E	4	28	eAg	NA	H1	NA
CTATCT	CAGATC	4245	52	E	4	28	Norm.bc	0.5pM	H1	NA
CTATCT	CGATGT	495	52	E	4	28	sAg	NA	H1	NA
CTATCT	GCCAAT	21238	52	E	4	28	Norm.bc	1pM	H1	NA
CTCAGA	ACAGTG	182803	40	D	4	16	Norm.bc	10pM	H1	NA
CTCAGA	ATCACG	2045	40	D	4	16	eAg	NA	H1	NA
CTCAGA	CAGATC	3554	40	D	4	16	Norm.bc	0.5pM	H1	NA
CTCAGA	CGATGT	1556	40	D	4	16	sAg	NA	H1	NA
CTCAGA	GCCAAT	18097	40	D	4	16	Norm.bc	1pM	H1	NA
CTTGTA	ACAGTG	231951	12	A	12	12	Norm.bc	10pM	H1	NA
CTTGTA	ATCACG	124	12	A	12	12	eAg	NA	H1	NA
CTTGTA	CAGATC	4584	12	A	12	12	Norm.bc	0.5pM	H1	NA
CTTGTA	CGATGT	539	12	A	12	12	sAg	NA	H1	NA
CTTGTA	GCCAAT	22967	12	A	12	12	Norm.bc	1pM	H1	NA
GAATGC	ACAGTG	220955	91	H	7	43	Norm.bc	10pM	H1	NA
GAATGC	ATCACG	267	91	H	7	43	eAg	NA	H1	NA
GAATGC	CAGATC	4208	91	H	7	43	Norm.bc	0.5pM	H1	NA
GAATGC	CGATGT	444	91	H	7	43	sAg	NA	H1	NA
GAATGC	GCCAAT	21909	91	H	7	43	Norm.bc	1pM	H1	NA
GACGAC	ACAGTG	160308	41	D	5	17	Norm.bc	10pM	H1	NA
GACGAC	ATCACG	303	41	D	5	17	eAg	NA	H1	NA
GACGAC	CAGATC	3138	41	D	5	17	Norm.bc	0.5pM	H1	NA
GACGAC	CGATGT	45428	41	D	5	17	sAg	NA	H1	NA
GACGAC	GCCAAT	15625	41	D	5	17	Norm.bc	1pM	H1	NA
GACGAT	ACAGTG	151366	62	F	2	26	Norm.bc	10pM	H1	NA
GACGAT	ATCACG	359	62	F	2	26	eAg	NA	H1	NA
GACGAT	CAGATC	2918	62	F	2	26	Norm.bc	0.5pM	H1	NA
GACGAT	CGATGT	486	62	F	2	26	sAg	NA	H1	NA
GACGAT	GCCAAT	14916	62	F	2	26	Norm.bc	1pM	H1	NA
GAGCGC	ACAGTG	106995	66	F	6	30	Norm.bc	10pM	H1	NA
GAGCGC	ATCACG	73	66	F	6	30	eAg	NA	H1	NA
GAGCGC	CAGATC	2150	66	F	6	30	Norm.bc	0.5pM	H1	NA
GAGCGC	CGATGT	140	66	F	6	30	sAg	NA	H1	NA
GAGCGC	GCCAAT	10807	66	F	6	30	Norm.bc	1pM	H1	NA
GAGTCT	ACAGTG	77379	69	F	9	33	Norm.bc	10pM	H1	NA
GAGTCT	ATCACG	59	69	F	9	33	eAg	NA	H1	NA
GAGTCT	CAGATC	1440	69	F	9	33	Norm.bc	0.5pM	H1	NA
GAGTCT	CGATGT	216	69	F	9	33	sAg	NA	H1	NA
GAGTCT	GCCAAT	7718	69	F	9	33	Norm.bc	1pM	H1	NA
GAGTGG	ACAGTG	100303	23	B	11	11	Norm.bc	10pM	H1	NA
GAGTGG	ATCACG	113	23	B	11	11	eAg	NA	H1	NA
GAGTGG	CAGATC	1931	23	B	11	11	Norm.bc	0.5pM	H1	NA
GAGTGG	CGATGT	518	23	B	11	11	sAg	NA	H1	NA
GAGTGG	GCCAAT	9946	23	B	11	11	Norm.bc	1pM	H1	NA
GATCAG	ACAGTG	210806	9	A	9	9	Norm.bc	10pM	H1	NA
GATCAG	ATCACG	370	9	A	9	9	eAg	NA	H1	NA
GATCAG	CAGATC	4055	9	A	9	9	Norm.bc	0.5pM	H1	NA
GATCAG	CGATGT	588	9	A	9	9	sAg	NA	H1	NA
GATCAG	GCCAAT	21173	9	A	9	9	Norm.bc	1pM	H1	NA
GCCAAT	ACAGTG	205698	6	A	6	6	Norm.bc	10pM	H1	NA
GCCAAT	ATCACG	12055	6	A	6	6	eAg	NA	H1	NA
GCCAAT	CAGATC	3982	6	A	6	6	Norm.bc	0.5pM	H1	NA
GCCAAT	CGATGT	11000	6	A	6	6	sAg	NA	H1	NA
GCCAAT	GCCAAT	20491	6	A	6	6	Norm.bc	1pM	H1	NA
GGAGAA	ACAGTG	125302	73	G	1	37	Norm.bc	10pM	H1	NA
GGAGAA	ATCACG	164	73	G	1	37	eAg	NA	H1	NA
GGAGAA	CAGATC	2387	73	G	1	37	Norm.bc	0.5pM	H1	NA
GGAGAA	CGATGT	751	73	G	1	37	sAg	NA	H1	NA
GGAGAA	GCCAAT	12362	73	G	1	37	Norm.bc	1pM	H1	NA
GGCTAC	ACAGTG	212749	11	A	11	11	Norm.bc	10pM	H1	NA
GGCTAC	ATCACG	164	11	A	11	11	eAg	NA	H1	NA
GGCTAC	CAGATC	4181	11	A	11	11	Norm.bc	0.5pM	H1	NA
GGCTAC	CGATGT	500	11	A	11	11	sAg	NA	H1	NA
GGCTAC	GCCAAT	21061	11	A	11	11	Norm.bc	1pM	H1	NA
GGTAGC	ACAGTG	176279	24	B	12	12	Norm.bc	10pM	H1	NA
GGTAGC	ATCACG	210	24	B	12	12	eAg	NA	H1	NA
GGTAGC	CAGATC	3458	24	B	12	12	Norm.bc	0.5pM	H1	NA
GGTAGC	CGATGT	499	24	B	12	12	sAg	NA	H1	NA
GGTAGC	GCCAAT	17555	24	B	12	12	Norm.bc	1pM	H1	NA
GTACTT	ACAGTG	161769	49	E	1	25	Norm.bc	10pM	H1	NA
GTACTT	ATCACG	178	49	E	1	25	eAg	NA	H1	NA
GTACTT	CAGATC	3129	49	E	1	25	Norm.bc	0.5pM	H1	NA
GTACTT	CGATGT	449	49	E	1	25	sAg	NA	H1	NA
GTACTT	GCCAAT	16418	49	E	1	25	Norm.bc	1pM	H1	NA
GTAGAG	ACAGTG	178325	17	B	5	5	Norm.bc	10pM	H1	NA
GTAGAG	ATCACG	147	17	B	5	5	eAg	NA	H1	NA
GTAGAG	CAGATC	3411	17	B	5	5	Norm.bc	0.5pM	H1	NA
GTAGAG	CGATGT	383	17	B	5	5	sAg	NA	H1	NA
GTAGAG	GCCAAT	17476	17	B	5	5	Norm.bc	1pM	H1	NA
GTCCGC	ACAGTG	111080	18	B	6	6	Norm.bc	10pM	H1	NA
GTCCGC	ATCACG	6926	18	B	6	6	eAg	NA	H1	NA
GTCCGC	CAGATC	2106	18	B	6	6	Norm.bc	0.5pM	H1	NA
GTCCGC	CGATGT	6099	18	B	6	6	sAg	NA	H1	NA
GTCCGC	GCCAAT	10858	18	B	6	6	Norm.bc	1pM	H1	NA
GTGAAA	ACAGTG	177019	19	B	7	7	Norm.bc	10pM	H1	NA
GTGAAA	ATCACG	99	19	B	7	7	eAg	NA	H1	NA
GTGAAA	CAGATC	3311	19	B	7	7	Norm.bc	0.5pM	H1	NA
GTGAAA	CGATGT	354	19	B	7	7	sAg	NA	H1	NA
GTGAAA	GCCAAT	17153	19	B	7	7	Norm.bc	1pM	H1	NA
GTGAGA	ACAGTG	226537	87	H	3	39	Norm.bc	10pM	H1	NA
GTGAGA	ATCACG	285	87	H	3	39	eAg	NA	H1	NA
GTGAGA	CAGATC	4363	87	H	3	39	Norm.bc	0.5pM	H1	NA
GTGAGA	CGATGT	1647	87	H	3	39	sAg	NA	H1	NA
GTGAGA	GCCAAT	22676	87	H	3	39	Norm.bc	1pM	H1	NA
GTGGCC	ACAGTG	110530	20	B	8	8	Norm.bc	10pM	H1	NA
GTGGCC	ATCACG	11037	20	B	8	8	eAg	NA	H1	NA
GTGGCC	CAGATC	2161	20	B	8	8	Norm.bc	0.5pM	H1	NA
GTGGCC	CGATGT	616	20	B	8	8	sAg	NA	H1	NA
GTGGCC	GCCAAT	11182	20	B	8	8	Norm.bc	1pM	H1	NA
GTGTAT	ACAGTG	216434	90	H	6	42	Norm.bc	10pM	H1	NA
GTGTAT	ATCACG	375	90	H	6	42	eAg	NA	H1	NA
GTGTAT	CAGATC	4275	90	H	6	42	Norm.bc	0.5pM	H1	NA
GTGTAT	CGATGT	93802	90	H	6	42	sAg	NA	H1	NA
GTGTAT	GCCAAT	21356	90	H	6	42	Norm.bc	1pM	H1	NA
GTTTCG	ACAGTG	92597	21	B	9	9	Norm.bc	10pM	H1	NA
GTTTCG	ATCACG	169	21	B	9	9	eAg	NA	H1	NA
GTTTCG	CAGATC	1755	21	B	9	9	Norm.bc	0.5pM	H1	NA
GTTTCG	CGATGT	290	21	B	9	9	sAg	NA	H1	NA
GTTTCG	GCCAAT	9250	21	B	9	9	Norm.bc	1pM	H1	NA
TAACCG	ACAGTG	93902	77	G	5	41	Norm.bc	10pM	H1	NA
TAACCG	ATCACG	879	77	G	5	41	eAg	NA	H1	NA
TAACCG	CAGATC	1773	77	G	5	41	Norm.bc	0.5pM	H1	NA
TAACCG	CGATGT	559	77	G	5	41	sAg	NA	H1	NA
TAACCG	GCCAAT	9257	77	G	5	41	Norm.bc	1pM	H1	NA
TAAGAC	ACAGTG	115692	88	H	4	40	Norm.bc	10pM	H1	NA
TAAGAC	ATCACG	63	88	H	4	40	eAg	NA	H1	NA
TAAGAC	CAGATC	2223	88	H	4	40	Norm.bc	0.5pM	H1	NA
TAAGAC	CGATGT	224	88	H	4	40	sAg	NA	H1	NA
TAAGAC	GCCAAT	11401	88	H	4	40	Norm.bc	1pM	H1	NA
TAATCG	ACAGTG	182889	42	D	6	18	Norm.bc	10pM	H1	NA
TAATCG	ATCACG	151	42	D	6	18	eAg	NA	H1	NA
TAATCG	CAGATC	3489	42	D	6	18	Norm.bc	0.5pM	H1	NA
TAATCG	CGATGT	605	42	D	6	18	sAg	NA	H1	NA
TAATCG	GCCAAT	17965	42	D	6	18	Norm.bc	1pM	H1	NA
TACAGC	ACAGTG	92834	43	D	7	19	Norm.bc	10pM	H1	NA
TACAGC	ATCACG	90	43	D	7	19	eAg	NA	H1	NA
TACAGC	CAGATC	1753	43	D	7	19	Norm.bc	0.5pM	H1	NA
TACAGC	CGATGT	312	43	D	7	19	sAg	NA	H1	NA
TACAGC	GCCAAT	8841	43	D	7	19	Norm.bc	1pM	H1	NA
TACCTT	ACAGTG	165408	65	F	5	29	Norm.bc	10pM	H1	NA
TACCTT	ATCACG	155	65	F	5	29	eAg	NA	H1	NA
TACCTT	CAGATC	3193	65	F	5	29	Norm.bc	0.5pM	H1	NA
TACCTT	CGATGT	536	65	F	5	29	sAg	NA	H1	NA
TACCTT	GCCAAT	16246	65	F	5	29	Norm.bc	1pM	H1	NA
TAGCTT	ACAGTG	176939	10	A	10	10	Norm.bc	10pM	H1	NA
TAGCTT	ATCACG	767	10	A	10	10	eAg	NA	H1	NA
TAGCTT	CAGATC	3429	10	A	10	10	Norm.bc	0.5pM	H1	NA
TAGCTT	CGATGT	320	10	A	10	10	sAg	NA	H1	NA
TAGCTT	GCCAAT	17697	10	A	10	10	Norm.bc	1pM	H1	NA
TATAAT	ACAGTG	118711	44	D	8	20	Norm.bc	10pM	H1	NA
TATAAT	ATCACG	109	44	D	8	20	eAg	NA	H1	NA
TATAAT	CAGATC	2317	44	D	8	20	Norm.bc	0.5pM	H1	NA
TATAAT	CGATGT	402	44	D	8	20	sAg	NA	H1	NA
TATAAT	GCCAAT	11957	44	D	8	20	Norm.bc	1pM	H1	NA
TATATC	ACAGTG	192314	53	E	5	29	Norm.bc	10pM	H1	NA
TATATC	ATCACG	208	53	E	5	29	eAg	NA	H1	NA
TATATC	CAGATC	3810	53	E	5	29	Norm.bc	0.5pM	H1	NA
TATATC	CGATGT	586	53	E	5	29	sAg	NA	H1	NA
TATATC	GCCAAT	19101	53	E	5	29	Norm.bc	1pM	H1	NA
TATGCA	ACAGTG	74704	75	G	3	39	Norm.bc	10pM	H1	NA
TATGCA	ATCACG	97	75	G	3	39	eAg	NA	H1	NA
TATGCA	CAGATC	1429	75	G	3	39	Norm.bc	0.5pM	H1	NA
TATGCA	CGATGT	463	75	G	3	39	sAg	NA	H1	NA
TATGCA	GCCAAT	7473	75	G	3	39	Norm.bc	1pM	H1	NA
TATTAT	ACAGTG	129728	54	E	6	30	Norm.bc	10pM	H1	NA
TATTAT	ATCACG	81	54	E	6	30	eAg	NA	H1	NA
TATTAT	CAGATC	2521	54	E	6	30	Norm.bc	0.5pM	H1	NA
TATTAT	CGATGT	252	54	E	6	30	sAg	NA	H1	NA
TATTAT	GCCAAT	13029	54	E	6	30	Norm.bc	1pM	H1	NA
TCATTC	ACAGTG	115646	45	D	9	21	Norm.bc	10pM	H1	NA
TCATTC	ATCACG	104	45	D	9	21	eAg	NA	H1	NA
TCATTC	CAGATC	2255	45	D	9	21	Norm.bc	0.5pM	H1	NA
TCATTC	CGATGT	281	45	D	9	21	sAg	NA	H1	NA
TCATTC	GCCAAT	11613	45	D	9	21	Norm.bc	1pM	H1	NA
TCCACA	ACAGTG	107673	56	E	8	32	Norm.bc	10pM	H1	NA
TCCACA	ATCACG	1237	56	E	8	32	eAg	NA	H1	NA
TCCACA	CAGATC	2112	56	E	8	32	Norm.bc	0.5pM	H1	NA
TCCACA	CGATGT	3384	56	E	8	32	sAg	NA	H1	NA
TCCACA	GCCAAT	10508	56	E	8	32	Norm.bc	1pM	H1	NA
TCCCGA	ACAGTG	127583	46	D	10	22	Norm.bc	10pM	H1	NA
TCCCGA	ATCACG	108	46	D	10	22	eAg	NA	H1	NA
TCCCGA	CAGATC	2476	46	D	10	22	Norm.bc	0.5pM	H1	NA
TCCCGA	CGATGT	311	46	D	10	22	sAg	NA	H1	NA
TCCCGA	GCCAAT	12511	46	D	10	22	Norm.bc	1pM	H1	NA
TCCTGC	ACAGTG	105360	58	E	10	34	Norm.bc	10pM	H1	NA
TCCTGC	ATCACG	90	58	E	10	34	eAg	NA	H1	NA
TCCTGC	CAGATC	2006	58	E	10	34	Norm.bc	0.5pM	H1	NA
TCCTGC	CGATGT	213	58	E	10	34	sAg	NA	H1	NA
TCCTGC	GCCAAT	10486	58	E	10	34	Norm.bc	1pM	H1	NA
TCGAAG	ACAGTG	105544	47	D	11	23	Norm.bc	10pM	H1	NA
TCGAAG	ATCACG	19084	47	D	11	23	eAg	NA	H1	NA
TCGAAG	CAGATC	2061	47	D	11	23	Norm.bc	0.5pM	H1	NA
TCGAAG	CGATGT	57202	47	D	11	23	sAg	NA	H1	NA
TCGAAG	GCCAAT	10605	47	D	11	23	Norm.bc	1pM	H1	NA
TCGGCA	ACAGTG	224758	48	D	12	24	Norm.bc	10pM	H1	NA
TCGGCA	ATCACG	442	48	D	12	24	eAg	NA	H1	NA
TCGGCA	CAGATC	4408	48	D	12	24	Norm.bc	0.5pM	H1	NA
TCGGCA	CGATGT	693	48	D	12	24	sAg	NA	H1	NA
TCGGCA	GCCAAT	22577	48	D	12	24	Norm.bc	1pM	H1	NA
TGACCA	ACAGTG	201052	4	A	4	4	Norm.bc	10pM	H1	NA
TGACCA	ATCACG	92	4	A	4	4	eAg	NA	H1	NA
TGACCA	CAGATC	3838	4	A	4	4	Norm.bc	0.5pM	H1	NA
TGACCA	CGATGT	325	4	A	4	4	sAg	NA	H1	NA
TGACCA	GCCAAT	19999	4	A	4	4	Norm.bc	1pM	H1	NA
TGCGCT	ACAGTG	110472	60	E	12	36	Norm.bc	10pM	H1	NA
TGCGCT	ATCACG	180	60	E	12	36	eAg	NA	H1	NA
TGCGCT	CAGATC	2118	60	E	12	36	Norm.bc	0.5pM	H1	NA
TGCGCT	CGATGT	500	60	E	12	36	sAg	NA	H1	NA
TGCGCT	GCCAAT	11379	60	E	12	36	Norm.bc	1pM	H1	NA
TGGAGC	ACAGTG	208080	79	G	7	43	Norm.bc	10pM	H1	NA
TGGAGC	ATCACG	294	79	G	7	43	eAg	NA	H1	NA
TGGAGC	CAGATC	3969	79	G	7	43	Norm.bc	0.5pM	H1	NA
TGGAGC	CGATGT	541	79	G	7	43	sAg	NA	H1	NA
TGGAGC	GCCAAT	20671	79	G	7	43	Norm.bc	1pM	H1	NA
TTAGGC	ACAGTG	134560	3	A	3	3	Norm.bc	10pM	H1	NA
TTAGGC	ATCACG	398	3	A	3	3	eAg	NA	H1	NA
TTAGGC	CAGATC	2562	3	A	3	3	Norm.bc	0.5pM	H1	NA
TTAGGC	CGATGT	1031	3	A	3	3	sAg	NA	H1	NA
TTAGGC	GCCAAT	13120	3	A	3	3	Norm.bc	1pM	H1	NA
TTCTCG	ACAGTG	136952	57	E	9	33	Norm.bc	10pM	H1	NA
TTCTCG	ATCACG	115	57	E	9	33	eAg	NA	H1	NA
TTCTCG	CAGATC	2760	57	E	9	33	Norm.bc	0.5pM	H1	NA
TTCTCG	CGATGT	385	57	E	9	33	sAg	NA	H1	NA
TTCTCG	GCCAAT	13932	57	E	9	33	Norm.bc	1pM	H1	NA
TTGCGG	ACAGTG	131041	63	F	3	27	Norm.bc	10pM	H1	NA
TTGCGG	ATCACG	103	63	F	3	27	eAg	NA	H1	NA
TTGCGG	CAGATC	2497	63	F	3	27	Norm.bc	0.5pM	H1	NA
TTGCGG	CGATGT	238	63	F	3	27	sAg	NA	H1	NA
TTGCGG	GCCAAT	12864	63	F	3	27	Norm.bc	1pM	H1	NA
AACGGA	ACAGTG	244879	61	F	1	68	Norm.bc	10pM	H2	NA
AACGGA	ATCACG	3729	61	F	1	68	eAg	NA	H2	NA
AACGGA	CAGATC	4875	61	F	1	68	Norm.bc	0.5pM	H2	NA
AACGGA	CGATGT	1928	61	F	1	68	sAg	NA	H2	NA
AACGGA	GCCAAT	24178	61	F	1	68	Norm.bc	1pM	H2	NA
AAGGAG	ACAGTG	195486	51	E	3	70	Norm.bc	10pM	H2	NA
AAGGAG	ATCACG	713	51	E	3	70	eAg	NA	H2	NA
AAGGAG	CAGATC	3675	51	E	3	70	Norm.bc	0.5pM	H2	NA
AAGGAG	CGATGT	5287	51	E	3	70	sAg	NA	H2	NA
AAGGAG	GCCAAT	19359	51	E	3	70	Norm.bc	1pM	H2	NA
AATCGT	ACAGTG	183580	68	F	8	75	Norm.bc	10pM	H2	NA
AATCGT	ATCACG	211	68	F	8	75	eAg	NA	H2	NA
AATCGT	CAGATC	3660	68	F	8	75	Norm.bc	0.5pM	H2	NA
AATCGT	CGATGT	375	68	F	8	75	sAg	NA	H2	NA
AATCGT	GCCAAT	18048	68	F	8	75	Norm.bc	1pM	H2	NA
AATTCC	ACAGTG	178945	71	F	11	78	Norm.bc	10pM	H2	NA
AATTCC	ATCACG	1518	71	F	11	78	eAg	NA	H2	NA
AATTCC	CAGATC	3368	71	F	11	78	Norm.bc	0.5pM	H2	NA
AATTCC	CGATGT	555	71	F	11	78	sAg	NA	H2	NA
AATTCC	GCCAAT	17668	71	F	11	78	Norm.bc	1pM	H2	NA
ACAGTG	ACAGTG	201776	5	A	5	48	Norm.bc	10pM	H2	NA
ACAGTG	ATCACG	262	5	A	5	48	eAg	NA	H2	NA
ACAGTG	CAGATC	3976	5	A	5	48	Norm.bc	0.5pM	H2	NA
ACAGTG	CGATGT	593	5	A	5	48	sAg	NA	H2	NA
ACAGTG	GCCAAT	19925	5	A	5	48	Norm.bc	1pM	H2	NA
ACGAGG	ACAGTG	174291	67	F	7	74	Norm.bc	10pM	H2	NA
ACGAGG	ATCACG	54	67	F	7	74	eAg	NA	H2	NA
ACGAGG	CAGATC	3307	67	F	7	74	Norm.bc	0.5pM	H2	NA
ACGAGG	CGATGT	162	67	F	7	74	sAg	NA	H2	NA
ACGAGG	GCCAAT	17045	67	F	7	74	Norm.bc	1pM	H2	NA
ACTGAT	ACAGTG	186157	25	C	1	56	Norm.bc	10pM	H2	NA
ACTGAT	ATCACG	106	25	C	1	56	eAg	NA	H2	NA
ACTGAT	CAGATC	3645	25	C	1	56	Norm.bc	0.5pM	H2	NA
ACTGAT	CGATGT	388	25	C	1	56	sAg	NA	H2	NA
ACTGAT	GCCAAT	18375	25	C	1	56	Norm.bc	1pM	H2	NA
ACTTGA	ACAGTG	149106	8	A	8	51	Norm.bc	10pM	H2	NA
ACTTGA	ATCACG	102	8	A	8	51	eAg	NA	H2	NA
ACTTGA	CAGATC	2960	8	A	8	51	Norm.bc	0.5pM	H2	NA
ACTTGA	CGATGT	276	8	A	8	51	sAg	NA	H2	NA
ACTTGA	GCCAAT	14746	8	A	8	51	Norm.bc	1pM	H2	NA
AGACCA	ACAGTG	133834	70	F	10	77	Norm.bc	10pM	H2	NA
AGACCA	ATCACG	102	70	F	10	77	eAg	NA	H2	NA
AGACCA	CAGATC	2560	70	F	10	77	Norm.bc	0.5pM	H2	NA
AGACCA	CGATGT	289	70	F	10	77	sAg	NA	H2	NA
AGACCA	GCCAAT	13257	70	F	10	77	Norm.bc	1pM	H2	NA
AGATGT	ACAGTG	75989	72	F	12	79	Norm.bc	10pM	H2	NA
AGATGT	ATCACG	471	72	F	12	79	eAg	NA	H2	NA
AGATGT	CAGATC	1436	72	F	12	79	Norm.bc	0.5pM	H2	NA
AGATGT	CGATGT	553	72	F	12	79	sAg	NA	H2	NA
AGATGT	GCCAAT	7364	72	F	12	79	Norm.bc	1pM	H2	NA
AGCACC	ACAGTG	206884	55	E	7	74	Norm.bc	10pM	H2	NA
AGCACC	ATCACG	59	55	E	7	74	eAg	NA	H2	NA
AGCACC	CAGATC	3998	55	E	7	74	Norm.bc	0.5pM	H2	NA
AGCACC	CGATGT	210	55	E	7	74	sAg	NA	H2	NA
AGCACC	GCCAAT	20343	55	E	7	74	Norm.bc	1pM	H2	NA
AGTCAA	ACAGTG	189046	13	B	1	44	Norm.bc	10pM	H2	NA
AGTCAA	ATCACG	143	13	B	1	44	eAg	NA	H2	NA
AGTCAA	CAGATC	3595	13	B	1	44	Norm.bc	0.5pM	H2	NA
AGTCAA	CGATGT	478	13	B	1	44	sAg	NA	H2	NA
AGTCAA	GCCAAT	18695	13	B	1	44	Norm.bc	1pM	H2	NA
AGTCTC	ACAGTG	170422	78	G	6	85	Norm.bc	10pM	H2	NA
AGTCTC	ATCACG	144	78	G	6	85	eAg	NA	H2	NA
AGTCTC	CAGATC	3205	78	G	6	85	Norm.bc	0.5pM	H2	NA
AGTCTC	CGATGT	444	78	G	6	85	sAg	NA	H2	NA
AGTCTC	GCCAAT	16922	78	G	6	85	Norm.bc	1pM	H2	NA
AGTTCC	ACAGTG	147647	14	B	2	45	Norm.bc	10pM	H2	NA
AGTTCC	ATCACG	73	14	B	2	45	eAg	NA	H2	NA
AGTTCC	CAGATC	2764	14	B	2	45	Norm.bc	0.5pM	H2	NA
AGTTCC	CGATGT	363	14	B	2	45	sAg	NA	H2	NA
AGTTCC	GCCAAT	14613	14	B	2	45	Norm.bc	1pM	H2	NA
ATAGAT	ACAGTG	157219	74	G	2	81	Norm.bc	10pM	H2	NA
ATAGAT	ATCACG	93	74	G	2	81	eAg	NA	H2	NA
ATAGAT	CAGATC	3088	74	G	2	81	Norm.bc	0.5pM	H2	NA
ATAGAT	CGATGT	333	74	G	2	81	sAg	NA	H2	NA
ATAGAT	GCCAAT	15289	74	G	2	81	Norm.bc	1pM	H2	NA
ATCACG	ACAGTG	168874	1	A	1	44	Norm.bc	10pM	H2	NA
ATCACG	ATCACG	131	1	A	1	44	eAg	NA	H2	NA
ATCACG	CAGATC	3352	1	A	1	44	Norm.bc	0.5pM	H2	NA
ATCACG	CGATGT	438	1	A	1	44	sAg	NA	H2	NA
ATCACG	GCCAAT	16801	1	A	1	44	Norm.bc	1pM	H2	NA
ATCCAA	ACAGTG	218690	86	H	2	81	Norm.bc	10pM	H2	NA
ATCCAA	ATCACG	188	86	H	2	81	eAg	NA	H2	NA
ATCCAA	CAGATC	4223	86	H	2	81	Norm.bc	0.5pM	H2	NA
ATCCAA	CGATGT	521	86	H	2	81	sAg	NA	H2	NA
ATCCAA	GCCAAT	21320	86	H	2	81	Norm.bc	1pM	H2	NA
ATGAGC	ACAGTG	171530	26	C	2	57	Norm.bc	10pM	H2	NA
ATGAGC	ATCACG	209	26	C	2	57	eAg	NA	H2	NA
ATGAGC	CAGATC	3311	26	C	2	57	Norm.bc	0.5pM	H2	NA
ATGAGC	CGATGT	376	26	C	2	57	sAg	NA	H2	NA
ATGAGC	GCCAAT	16884	26	C	2	57	Norm.bc	1pM	H2	NA
ATGGCA	ACAGTG	165370	50	E	2	69	Norm.bc	10pM	H2	NA
ATGGCA	ATCACG	86	50	E	2	69	eAg	NA	H2	NA
ATGGCA	CAGATC	3256	50	E	2	69	Norm.bc	0.5pM	H2	NA
ATGGCA	CGATGT	234	50	E	2	69	sAg	NA	H2	NA
ATGGCA	GCCAAT	16399	50	E	2	69	Norm.bc	1pM	H2	NA
ATGTCA	ACAGTG	200175	15	B	3	46	Norm.bc	10pM	H2	NA
ATGTCA	ATCACG	146	15	B	3	46	eAg	NA	H2	NA
ATGTCA	CAGATC	3806	15	B	3	46	Norm.bc	0.5pM	H2	NA
ATGTCA	CGATGT	486	15	B	3	46	sAg	NA	H2	NA
ATGTCA	GCCAAT	19634	15	B	3	46	Norm.bc	1pM	H2	NA
ATTCCT	ACAGTG	195594	27	C	3	58	Norm.bc	10pM	H2	NA
ATTCCT	ATCACG	633	27	C	3	58	eAg	NA	H2	NA
ATTCCT	CAGATC	3747	27	C	3	58	Norm.bc	0.5pM	H2	NA
ATTCCT	CGATGT	1986	27	C	3	58	sAg	NA	H2	NA
ATTCCT	GCCAAT	19243	27	C	3	58	Norm.bc	1pM	H2	NA
CAAAAG	ACAGTG	153176	28	C	4	59	Norm.bc	10pM	H2	NA
CAAAAG	ATCACG	133	28	C	4	59	eAg	NA	H2	NA
CAAAAG	CAGATC	2872	28	C	4	59	Norm.bc	0.5pM	H2	NA
CAAAAG	CGATGT	390	28	C	4	59	sAg	NA	H2	NA
CAAAAG	GCCAAT	14968	28	C	4	59	Norm.bc	1pM	H2	NA
CAACTA	ACAGTG	163388	29	C	5	60	Norm.bc	10pM	H2	NA
CAACTA	ATCACG	440	29	C	5	60	eAg	NA	H2	NA
CAACTA	CAGATC	3143	29	C	5	60	Norm.bc	0.5pM	H2	NA
CAACTA	CGATGT	338	29	C	5	60	sAg	NA	H2	NA
CAACTA	GCCAAT	16392	29	C	5	60	Norm.bc	1pM	H2	NA
CAAGTT	ACAGTG	187037	64	F	4	71	Norm.bc	10pM	H2	NA
CAAGTT	ATCACG	998	64	F	4	71	eAg	NA	H2	NA
CAAGTT	CAGATC	3452	64	F	4	71	Norm.bc	0.5pM	H2	NA
CAAGTT	CGATGT	2878	64	F	4	71	sAg	NA	H2	NA
CAAGTT	GCCAAT	18355	64	F	4	71	Norm.bc	1pM	H2	NA
CACCGG	ACAGTG	56357	30	C	6	61	Norm.bc	10pM	H2	NA
CACCGG	ATCACG	36	30	C	6	61	eAg	NA	H2	NA
CACCGG	CAGATC	1117	30	C	6	61	Norm.bc	0.5pM	H2	NA
CACCGG	CGATGT	89	30	C	6	61	sAg	NA	H2	NA
CACCGG	GCCAAT	5486	30	C	6	61	Norm.bc	1pM	H2	NA
CACGAT	ACAGTG	158010	31	C	7	62	Norm.bc	10pM	H2	NA
CACGAT	ATCACG	117	31	C	7	62	eAg	NA	H2	NA
CACGAT	CAGATC	3028	31	C	7	62	Norm.bc	0.5pM	H2	NA
CACGAT	CGATGT	4348	31	C	7	62	sAg	NA	H2	NA
CACGAT	GCCAAT	15663	31	C	7	62	Norm.bc	1pM	H2	NA
CACTCA	ACAGTG	161266	32	C	8	63	Norm.bc	10pM	H2	NA
CACTCA	ATCACG	135	32	C	8	63	eAg	NA	H2	NA
CACTCA	CAGATC	3211	32	C	8	63	Norm.bc	0.5pM	H2	NA
CACTCA	CGATGT	457	32	C	8	63	sAg	NA	H2	NA
CACTCA	GCCAAT	15762	32	C	8	63	Norm.bc	1pM	H2	NA
CAGATC	ACAGTG	178296	7	A	7	50	Norm.bc	10pM	H2	NA
CAGATC	ATCACG	104	7	A	7	50	eAg	NA	H2	NA
CAGATC	CAGATC	3529	7	A	7	50	Norm.bc	0.5pM	H2	NA
CAGATC	CGATGT	356	7	A	7	50	sAg	NA	H2	NA
CAGATC	GCCAAT	17688	7	A	7	50	Norm.bc	1pM	H2	NA
CAGGCG	ACAGTG	128560	33	C	9	64	Norm.bc	10pM	H2	NA
CAGGCG	ATCACG	80	33	C	9	64	eAg	NA	H2	NA
CAGGCG	CAGATC	2444	33	C	9	64	Norm.bc	0.5pM	H2	NA
CAGGCG	CGATGT	319	33	C	9	64	sAg	NA	H2	NA
CAGGCG	GCCAAT	12734	33	C	9	64	Norm.bc	1pM	H2	NA
CATGGC	ACAGTG	146328	34	C	10	65	Norm.bc	10pM	H2	NA
CATGGC	ATCACG	288	34	C	10	65	eAg	NA	H2	NA
CATGGC	CAGATC	2816	34	C	10	65	Norm.bc	0.5pM	H2	NA
CATGGC	CGATGT	309	34	C	10	65	sAg	NA	H2	NA
CATGGC	GCCAAT	14308	34	C	10	65	Norm.bc	1pM	H2	NA
CATTTT	ACAGTG	189991	35	C	11	66	Norm.bc	10pM	H2	NA
CATTTT	ATCACG	73	35	C	11	66	eAg	NA	H2	NA
CATTTT	CAGATC	3642	35	C	11	66	Norm.bc	0.5pM	H2	NA
CATTTT	CGATGT	401	35	C	11	66	sAg	NA	H2	NA
CATTTT	GCCAAT	18732	35	C	11	66	Norm.bc	1pM	H2	NA
CCAACA	ACAGTG	67705	36	C	12	67	Norm.bc	10pM	H2	NA
CCAACA	ATCACG	67	36	C	12	67	eAg	NA	H2	NA
CCAACA	CAGATC	1271	36	C	12	67	Norm.bc	0.5pM	H2	NA
CCAACA	CGATGT	194	36	C	12	67	sAg	NA	H2	NA
CCAACA	GCCAAT	6669	36	C	12	67	Norm.bc	1pM	H2	NA
CCGTCC	ACAGTG	182650	16	B	4	47	Norm.bc	10pM	H2	NA
CCGTCC	ATCACG	123	16	B	4	47	eAg	NA	H2	NA
CCGTCC	CAGATC	3551	16	B	4	47	Norm.bc	0.5pM	H2	NA
CCGTCC	CGATGT	378	16	B	4	47	sAg	NA	H2	NA
CCGTCC	GCCAAT	17979	16	B	4	47	Norm.bc	1pM	H2	NA
CCTATT	ACAGTG	175682	76	G	4	83	Norm.bc	10pM	H2	NA
CCTATT	ATCACG	174	76	G	4	83	eAg	NA	H2	NA
CCTATT	CAGATC	3343	76	G	4	83	Norm.bc	0.5pM	H2	NA
CCTATT	CGATGT	349	76	G	4	83	sAg	NA	H2	NA
CCTATT	GCCAAT	17128	76	G	4	83	Norm.bc	1pM	H2	NA
CGATGT	ACAGTG	201477	2	A	2	45	Norm.bc	10pM	H2	NA
CGATGT	ATCACG	121	2	A	2	45	eAg	NA	H2	NA
CGATGT	CAGATC	3857	2	A	2	45	Norm.bc	0.5pM	H2	NA
CGATGT	CGATGT	587	2	A	2	45	sAg	NA	H2	NA
CGATGT	GCCAAT	19699	2	A	2	45	Norm.bc	1pM	H2	NA
CGCGGC	ACAGTG	196760	59	E	11	78	Norm.bc	10pM	H2	NA
CGCGGC	ATCACG	1401	59	E	11	78	eAg	NA	H2	NA
CGCGGC	CAGATC	3802	59	E	11	78	Norm.bc	0.5pM	H2	NA
CGCGGC	CGATGT	512	59	E	11	78	sAg	NA	H2	NA
CGCGGC	GCCAAT	19374	59	E	11	78	Norm.bc	1pM	H2	NA
CGGAAT	ACAGTG	159928	37	D	1	56	Norm.bc	10pM	H2	NA
CGGAAT	ATCACG	125	37	D	1	56	eAg	NA	H2	NA
CGGAAT	CAGATC	3048	37	D	1	56	Norm.bc	0.5pM	H2	NA
CGGAAT	CGATGT	386	37	D	1	56	sAg	NA	H2	NA
CGGAAT	GCCAAT	15861	37	D	1	56	Norm.bc	1pM	H2	NA
CGTACG	ACAGTG	194548	22	B	10	53	Norm.bc	10pM	H2	NA
CGTACG	ATCACG	259	22	B	10	53	eAg	NA	H2	NA
CGTACG	CAGATC	3845	22	B	10	53	Norm.bc	0.5pM	H2	NA
CGTACG	CGATGT	383	22	B	10	53	sAg	NA	H2	NA
CGTACG	GCCAAT	19266	22	B	10	53	Norm.bc	1pM	H2	NA
CGTTAG	ACAGTG	171912	89	H	5	84	Norm.bc	10pM	H2	NA
CGTTAG	ATCACG	367	89	H	5	84	eAg	NA	H2	NA
CGTTAG	CAGATC	3408	89	H	5	84	Norm.bc	0.5pM	H2	NA
CGTTAG	CGATGT	927	89	H	5	84	sAg	NA	H2	NA
CGTTAG	GCCAAT	17073	89	H	5	84	Norm.bc	1pM	H2	NA
CTAAGG	ACAGTG	237494	85	H	1	80	Norm.bc	10pM	H2	NA
CTAAGG	ATCACG	192	85	H	1	80	eAg	NA	H2	NA
CTAAGG	CAGATC	4729	85	H	1	80	Norm.bc	0.5pM	H2	NA
CTAAGG	CGATGT	5844	85	H	1	80	sAg	NA	H2	NA
CTAAGG	GCCAAT	23464	85	H	1	80	Norm.bc	1pM	H2	NA
CTAGCT	ACAGTG	168564	38	D	2	57	Norm.bc	10pM	H2	NA
CTAGCT	ATCACG	193	38	D	2	57	eAg	NA	H2	NA
CTAGCT	CAGATC	3300	38	D	2	57	Norm.bc	0.5pM	H2	NA
CTAGCT	CGATGT	443	38	D	2	57	sAg	NA	H2	NA
CTAGCT	GCCAAT	16658	38	D	2	57	Norm.bc	1pM	H2	NA
CTATAC	ACAGTG	132323	39	D	3	58	Norm.bc	10pM	H2	NA
CTATAC	ATCACG	428	39	D	3	58	eAg	NA	H2	NA
CTATAC	CAGATC	2500	39	D	3	58	Norm.bc	0.5pM	H2	NA
CTATAC	CGATGT	1440	39	D	3	58	sAg	NA	H2	NA
CTATAC	GCCAAT	13030	39	D	3	58	Norm.bc	1pM	H2	NA
CTATCT	ACAGTG	56078	52	E	4	71	Norm.bc	10pM	H2	NA
CTATCT	ATCACG	312	52	E	4	71	eAg	NA	H2	NA
CTATCT	CAGATC	1019	52	E	4	71	Norm.bc	0.5pM	H2	NA
CTATCT	CGATGT	904	52	E	4	71	sAg	NA	H2	NA
CTATCT	GCCAAT	5440	52	E	4	71	Norm.bc	1pM	H2	NA
CTCAGA	ACAGTG	136611	40	D	4	59	Norm.bc	10pM	H2	NA
CTCAGA	ATCACG	123	40	D	4	59	eAg	NA	H2	NA
CTCAGA	CAGATC	2602	40	D	4	59	Norm.bc	0.5pM	H2	NA
CTCAGA	CGATGT	400	40	D	4	59	sAg	NA	H2	NA
CTCAGA	GCCAAT	13294	40	D	4	59	Norm.bc	1pM	H2	NA
CTTGTA	ACAGTG	115320	12	A	12	55	Norm.bc	10pM	H2	NA
CTTGTA	ATCACG	160	12	A	12	55	eAg	NA	H2	NA
CTTGTA	CAGATC	2257	12	A	12	55	Norm.bc	0.5pM	H2	NA
CTTGTA	CGATGT	430	12	A	12	55	sAg	NA	H2	NA
CTTGTA	GCCAAT	11516	12	A	12	55	Norm.bc	1pM	H2	NA
GAATGC	ACAGTG	185991	91	H	7	86	Norm.bc	10pM	H2	NA
GAATGC	ATCACG	121	91	H	7	86	eAg	NA	H2	NA
GAATGC	CAGATC	3638	91	H	7	86	Norm.bc	0.5pM	H2	NA
GAATGC	CGATGT	319	91	H	7	86	sAg	NA	H2	NA
GAATGC	GCCAAT	18587	91	H	7	86	Norm.bc	1pM	H2	NA
GACGAC	ACAGTG	110787	41	D	5	60	Norm.bc	10pM	H2	NA
GACGAC	ATCACG	373	41	D	5	60	eAg	NA	H2	NA
GACGAC	CAGATC	2077	41	D	5	60	Norm.bc	0.5pM	H2	NA
GACGAC	CGATGT	245	41	D	5	60	sAg	NA	H2	NA
GACGAC	GCCAAT	10924	41	D	5	60	Norm.bc	1pM	H2	NA
GACGAT	ACAGTG	176507	62	F	2	69	Norm.bc	10pM	H2	NA
GACGAT	ATCACG	122	62	F	2	69	eAg	NA	H2	NA
GACGAT	CAGATC	3434	62	F	2	69	Norm.bc	0.5pM	H2	NA
GACGAT	CGATGT	316	62	F	2	69	sAg	NA	H2	NA
GACGAT	GCCAAT	17220	62	F	2	69	Norm.bc	1pM	H2	NA
GAGCGC	ACAGTG	161371	66	F	6	73	Norm.bc	10pM	H2	NA
GAGCGC	ATCACG	72	66	F	6	73	eAg	NA	H2	NA
GAGCGC	CAGATC	3182	66	F	6	73	Norm.bc	0.5pM	H2	NA
GAGCGC	CGATGT	235	66	F	6	73	sAg	NA	H2	NA
GAGCGC	GCCAAT	16063	66	F	6	73	Norm.bc	1pM	H2	NA
GAGTCT	ACAGTG	230406	69	F	9	76	Norm.bc	10pM	H2	NA
GAGTCT	ATCACG	420	69	F	9	76	eAg	NA	H2	NA
GAGTCT	CAGATC	4471	69	F	9	76	Norm.bc	0.5pM	H2	NA
GAGTCT	CGATGT	713	69	F	9	76	sAg	NA	H2	NA
GAGTCT	GCCAAT	22797	69	F	9	76	Norm.bc	1pM	H2	NA
GAGTGG	ACAGTG	180951	23	B	11	54	Norm.bc	10pM	H2	NA
GAGTGG	ATCACG	303	23	B	11	54	eAg	NA	H2	NA
GAGTGG	CAGATC	3541	23	B	11	54	Norm.bc	0.5pM	H2	NA
GAGTGG	CGATGT	342	23	B	11	54	sAg	NA	H2	NA
GAGTGG	GCCAAT	17765	23	B	11	54	Norm.bc	1pM	H2	NA
GATCAG	ACAGTG	211323	9	A	9	52	Norm.bc	10pM	H2	NA
GATCAG	ATCACG	131	9	A	9	52	eAg	NA	H2	NA
GATCAG	CAGATC	4124	9	A	9	52	Norm.bc	0.5pM	H2	NA
GATCAG	CGATGT	381	9	A	9	52	sAg	NA	H2	NA
GATCAG	GCCAAT	20811	9	A	9	52	Norm.bc	1pM	H2	NA
GCCAAT	ACAGTG	193507	6	A	6	49	Norm.bc	10pM	H2	NA
GCCAAT	ATCACG	1513	6	A	6	49	eAg	NA	H2	NA
GCCAAT	CAGATC	3782	6	A	6	49	Norm.bc	0.5pM	H2	NA
GCCAAT	CGATGT	332	6	A	6	49	sAg	NA	H2	NA
GCCAAT	GCCAAT	19056	6	A	6	49	Norm.bc	1pM	H2	NA
GGAGAA	ACAGTG	180646	73	G	1	80	Norm.bc	10pM	H2	NA
GGAGAA	ATCACG	103	73	G	1	80	eAg	NA	H2	NA
GGAGAA	CAGATC	3515	73	G	1	80	Norm.bc	0.5pM	H2	NA
GGAGAA	CGATGT	3240	73	G	1	80	sAg	NA	H2	NA
GGAGAA	GCCAAT	17679	73	G	1	80	Norm.bc	1pM	H2	NA
GGCTAC	ACAGTG	208267	11	A	11	54	Norm.bc	10pM	H2	NA
GGCTAC	ATCACG	276	11	A	11	54	eAg	NA	H2	NA
GGCTAC	CAGATC	4103	11	A	11	54	Norm.bc	0.5pM	H2	NA
GGCTAC	CGATGT	336	11	A	11	54	sAg	NA	H2	NA
GGCTAC	GCCAAT	20699	11	A	11	54	Norm.bc	1pM	H2	NA
GGTAGC	ACAGTG	239809	24	B	12	55	Norm.bc	10pM	H2	NA
GGTAGC	ATCACG	313	24	B	12	55	eAg	NA	H2	NA
GGTAGC	CAGATC	4651	24	B	12	55	Norm.bc	0.5pM	H2	NA
GGTAGC	CGATGT	745	24	B	12	55	sAg	NA	H2	NA
GGTAGC	GCCAAT	23846	24	B	12	55	Norm.bc	1pM	H2	NA
GTACTT	ACAGTG	182816	49	E	1	68	Norm.bc	10pM	H2	NA
GTACTT	ATCACG	2292	49	E	1	68	eAg	NA	H2	NA
GTACTT	CAGATC	3620	49	E	1	68	Norm.bc	0.5pM	H2	NA
GTACTT	CGATGT	1238	49	E	1	68	sAg	NA	H2	NA
GTACTT	GCCAAT	18010	49	E	1	68	Norm.bc	1pM	H2	NA
GTAGAG	ACAGTG	191014	17	B	5	48	Norm.bc	10pM	H2	NA
GTAGAG	ATCACG	169	17	B	5	48	eAg	NA	H2	NA
GTAGAG	CAGATC	3686	17	B	5	48	Norm.bc	0.5pM	H2	NA
GTAGAG	CGATGT	462	17	B	5	48	sAg	NA	H2	NA
GTAGAG	GCCAAT	18692	17	B	5	48	Norm.bc	1pM	H2	NA
GTCCGC	ACAGTG	67180	18	B	6	49	Norm.bc	10pM	H2	NA
GTCCGC	ATCACG	605	18	B	6	49	eAg	NA	H2	NA
GTCCGC	CAGATC	1317	18	B	6	49	Norm.bc	0.5pM	H2	NA
GTCCGC	CGATGT	153	18	B	6	49	sAg	NA	H2	NA
GTCCGC	GCCAAT	6650	18	B	6	49	Norm.bc	1pM	H2	NA
GTGAAA	ACAGTG	77881	19	B	7	50	Norm.bc	10pM	H2	NA
GTGAAA	ATCACG	64	19	B	7	50	eAg	NA	H2	NA
GTGAAA	CAGATC	1483	19	B	7	50	Norm.bc	0.5pM	H2	NA
GTGAAA	CGATGT	196	19	B	7	50	sAg	NA	H2	NA
GTGAAA	GCCAAT	7700	19	B	7	50	Norm.bc	1pM	H2	NA
GTGAGA	ACAGTG	246882	87	H	3	82	Norm.bc	10pM	H2	NA
GTGAGA	ATCACG	214	87	H	3	82	eAg	NA	H2	NA
GTGAGA	CAGATC	4857	87	H	3	82	Norm.bc	0.5pM	H2	NA
GTGAGA	CGATGT	452	87	H	3	82	sAg	NA	H2	NA
GTGAGA	GCCAAT	24739	87	H	3	82	Norm.bc	1pM	H2	NA
GTGGCC	ACAGTG	89798	20	B	8	51	Norm.bc	10pM	H2	NA
GTGGCC	ATCACG	64	20	B	8	51	eAg	NA	H2	NA
GTGGCC	CAGATC	1733	20	B	8	51	Norm.bc	0.5pM	H2	NA
GTGGCC	CGATGT	172	20	B	8	51	sAg	NA	H2	NA
GTGGCC	GCCAAT	9009	20	B	8	51	Norm.bc	1pM	H2	NA
GTGTAT	ACAGTG	199021	90	H	6	85	Norm.bc	10pM	H2	NA
GTGTAT	ATCACG	172	90	H	6	85	eAg	NA	H2	NA
GTGTAT	CAGATC	3870	90	H	6	85	Norm.bc	0.5pM	H2	NA
GTGTAT	CGATGT	612	90	H	6	85	sAg	NA	H2	NA
GTGTAT	GCCAAT	19992	90	H	6	85	Norm.bc	1pM	H2	NA
GTTTCG	ACAGTG	154484	21	B	9	52	Norm.bc	10pM	H2	NA
GTTTCG	ATCACG	100	21	B	9	52	eAg	NA	H2	NA
GTTTCG	CAGATC	2960	21	B	9	52	Norm.bc	0.5pM	H2	NA
GTTTCG	CGATGT	337	21	B	9	52	sAg	NA	H2	NA
GTTTCG	GCCAAT	15341	21	B	9	52	Norm.bc	1pM	H2	NA
TAACCG	ACAGTG	148815	77	G	5	84	Norm.bc	10pM	H2	NA
TAACCG	ATCACG	398	77	G	5	84	eAg	NA	H2	NA
TAACCG	CAGATC	2885	77	G	5	84	Norm.bc	0.5pM	H2	NA
TAACCG	CGATGT	945	77	G	5	84	sAg	NA	H2	NA
TAACCG	GCCAAT	14839	77	G	5	84	Norm.bc	1pM	H2	NA
TAAGAC	ACAGTG	242960	88	H	4	83	Norm.bc	10pM	H2	NA
TAAGAC	ATCACG	218	88	H	4	83	eAg	NA	H2	NA
TAAGAC	CAGATC	4700	88	H	4	83	Norm.bc	0.5pM	H2	NA
TAAGAC	CGATGT	489	88	H	4	83	sAg	NA	H2	NA
TAAGAC	GCCAAT	24161	88	H	4	83	Norm.bc	1pM	H2	NA
TAATCG	ACAGTG	148236	42	D	6	61	Norm.bc	10pM	H2	NA
TAATCG	ATCACG	63	42	D	6	61	eAg	NA	H2	NA
TAATCG	CAGATC	2866	42	D	6	61	Norm.bc	0.5pM	H2	NA
TAATCG	CGATGT	241	42	D	6	61	sAg	NA	H2	NA
TAATCG	GCCAAT	14432	42	D	6	61	Norm.bc	1pM	H2	NA
TACAGC	ACAGTG	72956	43	D	7	62	Norm.bc	10pM	H2	NA
TACAGC	ATCACG	60	43	D	7	62	eAg	NA	H2	NA
TACAGC	CAGATC	1426	43	D	7	62	Norm.bc	0.5pM	H2	NA
TACAGC	CGATGT	4689	43	D	7	62	sAg	NA	H2	NA
TACAGC	GCCAAT	7335	43	D	7	62	Norm.bc	1pM	H2	NA
TACCTT	ACAGTG	192780	65	F	5	72	Norm.bc	10pM	H2	NA
TACCTT	ATCACG	149	65	F	5	72	eAg	NA	H2	NA
TACCTT	CAGATC	3664	65	F	5	72	Norm.bc	0.5pM	H2	NA
TACCTT	CGATGT	422	65	F	5	72	sAg	NA	H2	NA
TACCTT	GCCAAT	18969	65	F	5	72	Norm.bc	1pM	H2	NA
TAGCTT	ACAGTG	266401	10	A	10	53	Norm.bc	10pM	H2	NA
TAGCTT	ATCACG	382	10	A	10	53	eAg	NA	H2	NA
TAGCTT	CAGATC	5241	10	A	10	53	Norm.bc	0.5pM	H2	NA
TAGCTT	CGATGT	524	10	A	10	53	sAg	NA	H2	NA
TAGCTT	GCCAAT	26463	10	A	10	53	Norm.bc	1pM	H2	NA
TATAAT	ACAGTG	185359	44	D	8	63	Norm.bc	10pM	H2	NA
TATAAT	ATCACG	205	44	D	8	63	eAg	NA	H2	NA
TATAAT	CAGATC	3710	44	D	8	63	Norm.bc	0.5pM	H2	NA
TATAAT	CGATGT	733	44	D	8	63	sAg	NA	H2	NA
TATAAT	GCCAAT	18280	44	D	8	63	Norm.bc	1pM	H2	NA
TATATC	ACAGTG	176441	53	E	5	72	Norm.bc	10pM	H2	NA
TATATC	ATCACG	130	53	E	5	72	eAg	NA	H2	NA
TATATC	CAGATC	3370	53	E	5	72	Norm.bc	0.5pM	H2	NA
TATATC	CGATGT	336	53	E	5	72	sAg	NA	H2	NA
TATATC	GCCAAT	17523	53	E	5	72	Norm.bc	1pM	H2	NA
TATGCA	ACAGTG	211504	75	G	3	82	Norm.bc	10pM	H2	NA
TATGCA	ATCACG	146	75	G	3	82	eAg	NA	H2	NA
TATGCA	CAGATC	4173	75	G	3	82	Norm.bc	0.5pM	H2	NA
TATGCA	CGATGT	351	75	G	3	82	sAg	NA	H2	NA
TATGCA	GCCAAT	21267	75	G	3	82	Norm.bc	1pM	H2	NA
TATTAT	ACAGTG	170400	54	E	6	73	Norm.bc	10pM	H2	NA
TATTAT	ATCACG	91	54	E	6	73	eAg	NA	H2	NA
TATTAT	CAGATC	3220	54	E	6	73	Norm.bc	0.5pM	H2	NA
TATTAT	CGATGT	216	54	E	6	73	sAg	NA	H2	NA
TATTAT	GCCAAT	16555	54	E	6	73	Norm.bc	1pM	H2	NA
TCATTC	ACAGTG	122859	45	D	9	64	Norm.bc	10pM	H2	NA
TCATTC	ATCACG	93	45	D	9	64	eAg	NA	H2	NA
TCATTC	CAGATC	2419	45	D	9	64	Norm.bc	0.5pM	H2	NA
TCATTC	CGATGT	324	45	D	9	64	sAg	NA	H2	NA
TCATTC	GCCAAT	12508	45	D	9	64	Norm.bc	1pM	H2	NA
TCCACA	ACAGTG	152375	56	E	8	75	Norm.bc	10pM	H2	NA
TCCACA	ATCACG	155	56	E	8	75	eAg	NA	H2	NA
TCCACA	CAGATC	2899	56	E	8	75	Norm.bc	0.5pM	H2	NA
TCCACA	CGATGT	287	56	E	8	75	sAg	NA	H2	NA
TCCACA	GCCAAT	14976	56	E	8	75	Norm.bc	1pM	H2	NA
TCCCGA	ACAGTG	134593	46	D	10	65	Norm.bc	10pM	H2	NA
TCCCGA	ATCACG	293	46	D	10	65	eAg	NA	H2	NA
TCCCGA	CAGATC	2675	46	D	10	65	Norm.bc	0.5pM	H2	NA
TCCCGA	CGATGT	297	46	D	10	65	sAg	NA	H2	NA
TCCCGA	GCCAAT	13459	46	D	10	65	Norm.bc	1pM	H2	NA
TCCTGC	ACAGTG	158487	58	E	10	77	Norm.bc	10pM	H2	NA
TCCTGC	ATCACG	122	58	E	10	77	eAg	NA	H2	NA
TCCTGC	CAGATC	3061	58	E	10	77	Norm.bc	0.5pM	H2	NA
TCCTGC	CGATGT	404	58	E	10	77	sAg	NA	H2	NA
TCCTGC	GCCAAT	15721	58	E	10	77	Norm.bc	1pM	H2	NA
TCGAAG	ACAGTG	176216	47	D	11	66	Norm.bc	10pM	H2	NA
TCGAAG	ATCACG	102	47	D	11	66	eAg	NA	H2	NA
TCGAAG	CAGATC	3410	47	D	11	66	Norm.bc	0.5pM	H2	NA
TCGAAG	CGATGT	372	47	D	11	66	sAg	NA	H2	NA
TCGAAG	GCCAAT	17623	47	D	11	66	Norm.bc	1pM	H2	NA
TCGGCA	ACAGTG	73409	48	D	12	67	Norm.bc	10pM	H2	NA
TCGGCA	ATCACG	46	48	D	12	67	eAg	NA	H2	NA
TCGGCA	CAGATC	1530	48	D	12	67	Norm.bc	0.5pM	H2	NA
TCGGCA	CGATGT	229	48	D	12	67	sAg	NA	H2	NA
TCGGCA	GCCAAT	7261	48	D	12	67	Norm.bc	1pM	H2	NA
TGACCA	ACAGTG	222567	4	A	4	47	Norm.bc	10pM	H2	NA
TGACCA	ATCACG	160	4	A	4	47	eAg	NA	H2	NA
TGACCA	CAGATC	4289	4	A	4	47	Norm.bc	0.5pM	H2	NA
TGACCA	CGATGT	354	4	A	4	47	sAg	NA	H2	NA
TGACCA	GCCAAT	21995	4	A	4	47	Norm.bc	1pM	H2	NA
TGCGCT	ACAGTG	71058	60	E	12	79	Norm.bc	10pM	H2	NA
TGCGCT	ATCACG	558	60	E	12	79	eAg	NA	H2	NA
TGCGCT	CAGATC	1362	60	E	12	79	Norm.bc	0.5pM	H2	NA
TGCGCT	CGATGT	579	60	E	12	79	sAg	NA	H2	NA
TGCGCT	GCCAAT	7000	60	E	12	79	Norm.bc	1pM	H2	NA
TGGAGC	ACAGTG	136557	79	G	7	86	Norm.bc	10pM	H2	NA
TGGAGC	ATCACG	48	79	G	7	86	eAg	NA	H2	NA
TGGAGC	CAGATC	2636	79	G	7	86	Norm.bc	0.5pM	H2	NA
TGGAGC	CGATGT	188	79	G	7	86	sAg	NA	H2	NA
TGGAGC	GCCAAT	13665	79	G	7	86	Norm.bc	1pM	H2	NA
TTAGGC	ACAGTG	248195	3	A	3	46	Norm.bc	10pM	H2	NA
TTAGGC	ATCACG	176	3	A	3	46	eAg	NA	H2	NA
TTAGGC	CAGATC	4929	3	A	3	46	Norm.bc	0.5pM	H2	NA
TTAGGC	CGATGT	469	3	A	3	46	sAg	NA	H2	NA
TTAGGC	GCCAAT	24783	3	A	3	46	Norm.bc	1pM	H2	NA
TTCTCG	ACAGTG	189001	57	E	9	76	Norm.bc	10pM	H2	NA
TTCTCG	ATCACG	293	57	E	9	76	eAg	NA	H2	NA
TTCTCG	CAGATC	3692	57	E	9	76	Norm.bc	0.5pM	H2	NA
TTCTCG	CGATGT	525	57	E	9	76	sAg	NA	H2	NA
TTCTCG	GCCAAT	18769	57	E	9	76	Norm.bc	1pM	H2	NA
TTGCGG	ACAGTG	151158	63	F	3	70	Norm.bc	10pM	H2	NA
TTGCGG	ATCACG	131	63	F	3	70	eAg	NA	H2	NA
TTGCGG	CAGATC	2976	63	F	3	70	Norm.bc	0.5pM	H2	NA
TTGCGG	CGATGT	4988	63	F	3	70	sAg	NA	H2	NA
TTGCGG	GCCAAT	14582	63	F	3	70	Norm.bc	1pM	H2	NA
AACGGA	ACAGTG	116017	61	F	1	111	Norm.bc	10pM	H3	NA
AACGGA	ATCACG	71	61	F	1	111	eAg	NA	H3	NA
AACGGA	CAGATC	2275	61	F	1	111	Norm.bc	0.5pM	H3	NA
AACGGA	CGATGT	402	61	F	1	111	sAg	NA	H3	NA
AACGGA	GCCAAT	11529	61	F	1	111	Norm.bc	1pM	H3	NA
AAGGAG	ACAGTG	122032	51	E	3	113	Norm.bc	10pM	H3	NA
AAGGAG	ATCACG	172	51	E	3	113	eAg	NA	H3	NA
AAGGAG	CAGATC	2327	51	E	3	113	Norm.bc	0.5pM	H3	NA
AAGGAG	CGATGT	35267	51	E	3	113	sAg	NA	H3	NA
AAGGAG	GCCAAT	12118	51	E	3	113	Norm.bc	1pM	H3	NA
AATCGT	ACAGTG	119302	68	F	8	118	Norm.bc	10pM	H3	NA
AATCGT	ATCACG	123	68	F	8	118	eAg	NA	H3	NA
AATCGT	CAGATC	2278	68	F	8	118	Norm.bc	0.5pM	H3	NA
AATCGT	CGATGT	263	68	F	8	118	sAg	NA	H3	NA
AATCGT	GCCAAT	11608	68	F	8	118	Norm.bc	1pM	H3	NA
AATTCC	ACAGTG	96057	71	F	11	121	Norm.bc	10pM	H3	NA
AATTCC	ATCACG	116	71	F	11	121	eAg	NA	H3	NA
AATTCC	CAGATC	1822	71	F	11	121	Norm.bc	0.5pM	H3	NA
AATTCC	CGATGT	254	71	F	11	121	sAg	NA	H3	NA
AATTCC	GCCAAT	9302	71	F	11	121	Norm.bc	1pM	H3	NA
ACAGTG	ACAGTG	140918	5	A	5	91	Norm.bc	10pM	H3	NA
ACAGTG	ATCACG	33	5	A	5	91	eAg	NA	H3	NA
ACAGTG	CAGATC	2681	5	A	5	91	Norm.bc	0.5pM	H3	NA
ACAGTG	CGATGT	284	5	A	5	91	sAg	NA	H3	NA
ACAGTG	GCCAAT	13778	5	A	5	91	Norm.bc	1pM	H3	NA
ACGAGG	ACAGTG	87083	67	F	7	117	Norm.bc	10pM	H3	NA
ACGAGG	ATCACG	97	67	F	7	117	eAg	NA	H3	NA
ACGAGG	CAGATC	1674	67	F	7	117	Norm.bc	0.5pM	H3	NA
ACGAGG	CGATGT	233	67	F	7	117	sAg	NA	H3	NA
ACGAGG	GCCAAT	8423	67	F	7	117	Norm.bc	1pM	H3	NA
ACTGAT	ACAGTG	104936	25	C	1	99	Norm.bc	10pM	H3	NA
ACTGAT	ATCACG	95	25	C	1	99	eAg	NA	H3	NA
ACTGAT	CAGATC	2056	25	C	1	99	Norm.bc	0.5pM	H3	NA
ACTGAT	CGATGT	362	25	C	1	99	sAg	NA	H3	NA
ACTGAT	GCCAAT	10344	25	C	1	99	Norm.bc	1pM	H3	NA
ACTTGA	ACAGTG	142606	8	A	8	94	Norm.bc	10pM	H3	NA
ACTTGA	ATCACG	71	8	A	8	94	eAg	NA	H3	NA
ACTTGA	CAGATC	2780	8	A	8	94	Norm.bc	0.5pM	H3	NA
ACTTGA	CGATGT	283	8	A	8	94	sAg	NA	H3	NA
ACTTGA	GCCAAT	14121	8	A	8	94	Norm.bc	1pM	H3	NA
AGACCA	ACAGTG	74917	70	F	10	120	Norm.bc	10pM	H3	NA
AGACCA	ATCACG	93	70	F	10	120	eAg	NA	H3	NA
AGACCA	CAGATC	1430	70	F	10	120	Norm.bc	0.5pM	H3	NA
AGACCA	CGATGT	370	70	F	10	120	sAg	NA	H3	NA
AGACCA	GCCAAT	7456	70	F	10	120	Norm.bc	1pM	H3	NA
AGATGT	ACAGTG	125169	72	F	12	122	Norm.bc	10pM	H3	NA
AGATGT	ATCACG	3129	72	F	12	122	eAg	NA	H3	NA
AGATGT	CAGATC	2531	72	F	12	122	Norm.bc	0.5pM	H3	NA
AGATGT	CGATGT	2706	72	F	12	122	sAg	NA	H3	NA
AGATGT	GCCAAT	12364	72	F	12	122	Norm.bc	1pM	H3	NA
AGCACC	ACAGTG	123196	55	E	7	117	Norm.bc	10pM	H3	NA
AGCACC	ATCACG	157	55	E	7	117	eAg	NA	H3	NA
AGCACC	CAGATC	2450	55	E	7	117	Norm.bc	0.5pM	H3	NA
AGCACC	CGATGT	307	55	E	7	117	sAg	NA	H3	NA
AGCACC	GCCAAT	12179	55	E	7	117	Norm.bc	1pM	H3	NA
AGTCAA	ACAGTG	114557	13	B	1	87	Norm.bc	10pM	H3	NA
AGTCAA	ATCACG	95	13	B	1	87	eAg	NA	H3	NA
AGTCAA	CAGATC	2173	13	B	1	87	Norm.bc	0.5pM	H3	NA
AGTCAA	CGATGT	380	13	B	1	87	sAg	NA	H3	NA
AGTCAA	GCCAAT	11313	13	B	1	87	Norm.bc	1pM	H3	NA
AGTCTC	ACAGTG	137094	78	G	6	128	Norm.bc	10pM	H3	NA
AGTCTC	ATCACG	62	78	G	6	128	eAg	NA	H3	NA
AGTCTC	CAGATC	2693	78	G	6	128	Norm.bc	0.5pM	H3	NA
AGTCTC	CGATGT	250	78	G	6	128	sAg	NA	H3	NA
AGTCTC	GCCAAT	13460	78	G	6	128	Norm.bc	1pM	H3	NA
AGTTCC	ACAGTG	119822	14	B	2	88	Norm.bc	10pM	H3	NA
AGTTCC	ATCACG	170	14	B	2	88	eAg	NA	H3	NA
AGTTCC	CAGATC	2332	14	B	2	88	Norm.bc	0.5pM	H3	NA
AGTTCC	CGATGT	286	14	B	2	88	sAg	NA	H3	NA
AGTTCC	GCCAAT	11848	14	B	2	88	Norm.bc	1pM	H3	NA
ATAGAT	ACAGTG	94605	74	G	2	124	Norm.bc	10pM	H3	NA
ATAGAT	ATCACG	33	74	G	2	124	eAg	NA	H3	NA
ATAGAT	CAGATC	1800	74	G	2	124	Norm.bc	0.5pM	H3	NA
ATAGAT	CGATGT	229	74	G	2	124	sAg	NA	H3	NA
ATAGAT	GCCAAT	9502	74	G	2	124	Norm.bc	1pM	H3	NA
ATCACG	ACAGTG	123152	1	A	1	87	Norm.bc	10pM	H3	NA
ATCACG	ATCACG	100	1	A	1	87	eAg	NA	H3	NA
ATCACG	CAGATC	2423	1	A	1	87	Norm.bc	0.5pM	H3	NA
ATCACG	CGATGT	382	1	A	1	87	sAg	NA	H3	NA
ATCACG	GCCAAT	12138	1	A	1	87	Norm.bc	1pM	H3	NA
ATCCAA	ACAGTG	130364	86	H	2	124	Norm.bc	10pM	H3	NA
ATCCAA	ATCACG	36	86	H	2	124	eAg	NA	H3	NA
ATCCAA	CAGATC	2456	86	H	2	124	Norm.bc	0.5pM	H3	NA
ATCCAA	CGATGT	342	86	H	2	124	sAg	NA	H3	NA
ATCCAA	GCCAAT	12743	86	H	2	124	Norm.bc	1pM	H3	NA
ATGAGC	ACAGTG	121398	26	C	2	100	Norm.bc	10pM	H3	NA
ATGAGC	ATCACG	100	26	C	2	100	eAg	NA	H3	NA
ATGAGC	CAGATC	2352	26	C	2	100	Norm.bc	0.5pM	H3	NA
ATGAGC	CGATGT	300	26	C	2	100	sAg	NA	H3	NA
ATGAGC	GCCAAT	11932	26	C	2	100	Norm.bc	1pM	H3	NA
ATGGCA	ACAGTG	116269	50	E	2	112	Norm.bc	10pM	H3	NA
ATGGCA	ATCACG	44	50	E	2	112	eAg	NA	H3	NA
ATGGCA	CAGATC	2241	50	E	2	112	Norm.bc	0.5pM	H3	NA
ATGGCA	CGATGT	183	50	E	2	112	sAg	NA	H3	NA
ATGGCA	GCCAAT	11697	50	E	2	112	Norm.bc	1pM	H3	NA
ATGTCA	ACAGTG	130067	15	B	3	89	Norm.bc	10pM	H3	NA
ATGTCA	ATCACG	556	15	B	3	89	eAg	NA	H3	NA
ATGTCA	CAGATC	2540	15	B	3	89	Norm.bc	0.5pM	H3	NA
ATGTCA	CGATGT	1424	15	B	3	89	sAg	NA	H3	NA
ATGTCA	GCCAAT	12876	15	B	3	89	Norm.bc	1pM	H3	NA
ATTCCT	ACAGTG	105542	27	C	3	101	Norm.bc	10pM	H3	NA
ATTCCT	ATCACG	58	27	C	3	101	eAg	NA	H3	NA
ATTCCT	CAGATC	2026	27	C	3	101	Norm.bc	0.5pM	H3	NA
ATTCCT	CGATGT	213	27	C	3	101	sAg	NA	H3	NA
ATTCCT	GCCAAT	10369	27	C	3	101	Norm.bc	1pM	H3	NA
CAAAAG	ACAGTG	128329	28	C	4	102	Norm.bc	10pM	H3	NA
CAAAAG	ATCACG	166	28	C	4	102	eAg	NA	H3	NA
CAAAAG	CAGATC	2536	28	C	4	102	Norm.bc	0.5pM	H3	NA
CAAAAG	CGATGT	407	28	C	4	102	sAg	NA	H3	NA
CAAAAG	GCCAAT	12759	28	C	4	102	Norm.bc	1pM	H3	NA
CAACTA	ACAGTG	129374	29	C	5	103	Norm.bc	10pM	H3	NA
CAACTA	ATCACG	81	29	C	5	103	eAg	NA	H3	NA
CAACTA	CAGATC	2504	29	C	5	103	Norm.bc	0.5pM	H3	NA
CAACTA	CGATGT	252	29	C	5	103	sAg	NA	H3	NA
CAACTA	GCCAAT	12600	29	C	5	103	Norm.bc	1pM	H3	NA
CAAGTT	ACAGTG	134082	64	F	4	114	Norm.bc	10pM	H3	NA
CAAGTT	ATCACG	325	64	F	4	114	eAg	NA	H3	NA
CAAGTT	CAGATC	2634	64	F	4	114	Norm.bc	0.5pM	H3	NA
CAAGTT	CGATGT	1289	64	F	4	114	sAg	NA	H3	NA
CAAGTT	GCCAAT	13323	64	F	4	114	Norm.bc	1pM	H3	NA
CACCGG	ACAGTG	95878	30	C	6	104	Norm.bc	10pM	H3	NA
CACCGG	ATCACG	83	30	C	6	104	eAg	NA	H3	NA
CACCGG	CAGATC	1823	30	C	6	104	Norm.bc	0.5pM	H3	NA
CACCGG	CGATGT	230	30	C	6	104	sAg	NA	H3	NA
CACCGG	GCCAAT	9504	30	C	6	104	Norm.bc	1pM	H3	NA
CACGAT	ACAGTG	103836	31	C	7	105	Norm.bc	10pM	H3	NA
CACGAT	ATCACG	498	31	C	7	105	eAg	NA	H3	NA
CACGAT	CAGATC	2014	31	C	7	105	Norm.bc	0.5pM	H3	NA
CACGAT	CGATGT	33163	31	C	7	105	sAg	NA	H3	NA
CACGAT	GCCAAT	10271	31	C	7	105	Norm.bc	1pM	H3	NA
CACTCA	ACAGTG	119815	32	C	8	106	Norm.bc	10pM	H3	NA
CACTCA	ATCACG	104	32	C	8	106	eAg	NA	H3	NA
CACTCA	CAGATC	2427	32	C	8	106	Norm.bc	0.5pM	H3	NA
CACTCA	CGATGT	336	32	C	8	106	sAg	NA	H3	NA
CACTCA	GCCAAT	11772	32	C	8	106	Norm.bc	1pM	H3	NA
CAGATC	ACAGTG	149418	7	A	7	93	Norm.bc	10pM	H3	NA
CAGATC	ATCACG	198	7	A	7	93	eAg	NA	H3	NA
CAGATC	CAGATC	3011	7	A	7	93	Norm.bc	0.5pM	H3	NA
CAGATC	CGATGT	421	7	A	7	93	sAg	NA	H3	NA
CAGATC	GCCAAT	14728	7	A	7	93	Norm.bc	1pM	H3	NA
CAGGCG	ACAGTG	120989	33	C	9	107	Norm.bc	10pM	H3	NA
CAGGCG	ATCACG	78	33	C	9	107	eAg	NA	H3	NA
CAGGCG	CAGATC	2318	33	C	9	107	Norm.bc	0.5pM	H3	NA
CAGGCG	CGATGT	233	33	C	9	107	sAg	NA	H3	NA
CAGGCG	GCCAAT	11786	33	C	9	107	Norm.bc	1pM	H3	NA
CATGGC	ACAGTG	106469	34	C	10	108	Norm.bc	10pM	H3	NA
CATGGC	ATCACG	1349	34	C	10	108	eAg	NA	H3	NA
CATGGC	CAGATC	2013	34	C	10	108	Norm.bc	0.5pM	H3	NA
CATGGC	CGATGT	323	34	C	10	108	sAg	NA	H3	NA
CATGGC	GCCAAT	10435	34	C	10	108	Norm.bc	1pM	H3	NA
CATTTT	ACAGTG	114797	35	C	11	109	Norm.bc	10pM	H3	NA
CATTTT	ATCACG	185	35	C	11	109	eAg	NA	H3	NA
CATTTT	CAGATC	2162	35	C	11	109	Norm.bc	0.5pM	H3	NA
CATTTT	CGATGT	470	35	C	11	109	sAg	NA	H3	NA
CATTTT	GCCAAT	11346	35	C	11	109	Norm.bc	1pM	H3	NA
CCAACA	ACAGTG	158589	36	C	12	110	Norm.bc	10pM	H3	NA
CCAACA	ATCACG	134	36	C	12	110	eAg	NA	H3	NA
CCAACA	CAGATC	3141	36	C	12	110	Norm.bc	0.5pM	H3	NA
CCAACA	CGATGT	661	36	C	12	110	sAg	NA	H3	NA
CCAACA	GCCAAT	15735	36	C	12	110	Norm.bc	1pM	H3	NA
CCGTCC	ACAGTG	124399	16	B	4	90	Norm.bc	10pM	H3	NA
CCGTCC	ATCACG	112	16	B	4	90	eAg	NA	H3	NA
CCGTCC	CAGATC	2353	16	B	4	90	Norm.bc	0.5pM	H3	NA
CCGTCC	CGATGT	238	16	B	4	90	sAg	NA	H3	NA
CCGTCC	GCCAAT	12153	16	B	4	90	Norm.bc	1pM	H3	NA
CCTATT	ACAGTG	129410	76	G	4	126	Norm.bc	10pM	H3	NA
CCTATT	ATCACG	75	76	G	4	126	eAg	NA	H3	NA
CCTATT	CAGATC	2473	76	G	4	126	Norm.bc	0.5pM	H3	NA
CCTATT	CGATGT	378	76	G	4	126	sAg	NA	H3	NA
CCTATT	GCCAAT	13180	76	G	4	126	Norm.bc	1pM	H3	NA
CGATGT	ACAGTG	138791	2	A	2	88	Norm.bc	10pM	H3	NA
CGATGT	ATCACG	179	2	A	2	88	eAg	NA	H3	NA
CGATGT	CAGATC	2643	2	A	2	88	Norm.bc	0.5pM	H3	NA
CGATGT	CGATGT	358	2	A	2	88	sAg	NA	H3	NA
CGATGT	GCCAAT	13721	2	A	2	88	Norm.bc	1pM	H3	NA
CGCGGC	ACAGTG	82964	59	E	11	121	Norm.bc	10pM	H3	NA
CGCGGC	ATCACG	76	59	E	11	121	eAg	NA	H3	NA
CGCGGC	CAGATC	1585	59	E	11	121	Norm.bc	0.5pM	H3	NA
CGCGGC	CGATGT	204	59	E	11	121	sAg	NA	H3	NA
CGCGGC	GCCAAT	8282	59	E	11	121	Norm.bc	1pM	H3	NA
CGGAAT	ACAGTG	124512	37	D	1	99	Norm.bc	10pM	H3	NA
CGGAAT	ATCACG	146	37	D	1	99	eAg	NA	H3	NA
CGGAAT	CAGATC	2465	37	D	1	99	Norm.bc	0.5pM	H3	NA
CGGAAT	CGATGT	386	37	D	1	99	sAg	NA	H3	NA
CGGAAT	GCCAAT	12389	37	D	1	99	Norm.bc	1pM	H3	NA
CGTACG	ACAGTG	107375	22	B	10	96	Norm.bc	10pM	H3	NA
CGTACG	ATCACG	166	22	B	10	96	eAg	NA	H3	NA
CGTACG	CAGATC	2132	22	B	10	96	Norm.bc	0.5pM	H3	NA
CGTACG	CGATGT	281	22	B	10	96	sAg	NA	H3	NA
CGTACG	GCCAAT	10758	22	B	10	96	Norm.bc	1pM	H3	NA
CGTTAG	ACAGTG	149449	89	H	5	127	Norm.bc	10pM	H3	NA
CGTTAG	ATCACG	2068	89	H	5	127	eAg	NA	H3	NA
CGTTAG	CAGATC	2941	89	H	5	127	Norm.bc	0.5pM	H3	NA
CGTTAG	CGATGT	4556	89	H	5	127	sAg	NA	H3	NA
CGTTAG	GCCAAT	14799	89	H	5	127	Norm.bc	1pM	H3	NA
CTAAGG	ACAGTG	116194	85	H	1	123	Norm.bc	10pM	H3	NA
CTAAGG	ATCACG	132	85	H	1	123	eAg	NA	H3	NA
CTAAGG	CAGATC	2274	85	H	1	123	Norm.bc	0.5pM	H3	NA
CTAAGG	CGATGT	405	85	H	1	123	sAg	NA	H3	NA
CTAAGG	GCCAAT	11432	85	H	1	123	Norm.bc	1pM	H3	NA
CTAGCT	ACAGTG	105379	38	D	2	100	Norm.bc	10pM	H3	NA
CTAGCT	ATCACG	75	38	D	2	100	eAg	NA	H3	NA
CTAGCT	CAGATC	2063	38	D	2	100	Norm.bc	0.5pM	H3	NA
CTAGCT	CGATGT	249	38	D	2	100	sAg	NA	H3	NA
CTAGCT	GCCAAT	10334	38	D	2	100	Norm.bc	1pM	H3	NA
CTATAC	ACAGTG	106516	39	D	3	101	Norm.bc	10pM	H3	NA
CTATAC	ATCACG	76	39	D	3	101	eAg	NA	H3	NA
CTATAC	CAGATC	2020	39	D	3	101	Norm.bc	0.5pM	H3	NA
CTATAC	CGATGT	251	39	D	3	101	sAg	NA	H3	NA
CTATAC	GCCAAT	10496	39	D	3	101	Norm.bc	1pM	H3	NA
CTATCT	ACAGTG	109358	52	E	4	114	Norm.bc	10pM	H3	NA
CTATCT	ATCACG	234	52	E	4	114	eAg	NA	H3	NA
CTATCT	CAGATC	2112	52	E	4	114	Norm.bc	0.5pM	H3	NA
CTATCT	CGATGT	996	52	E	4	114	sAg	NA	H3	NA
CTATCT	GCCAAT	10944	52	E	4	114	Norm.bc	1pM	H3	NA
CTCAGA	ACAGTG	119206	40	D	4	102	Norm.bc	10pM	H3	NA
CTCAGA	ATCACG	138	40	D	4	102	eAg	NA	H3	NA
CTCAGA	CAGATC	2276	40	D	4	102	Norm.bc	0.5pM	H3	NA
CTCAGA	CGATGT	343	40	D	4	102	sAg	NA	H3	NA
CTCAGA	GCCAAT	11443	40	D	4	102	Norm.bc	1pM	H3	NA
CTTGTA	ACAGTG	132849	12	A	12	98	Norm.bc	10pM	H3	NA
CTTGTA	ATCACG	75	12	A	12	98	eAg	NA	H3	NA
CTTGTA	CAGATC	2575	12	A	12	98	Norm.bc	0.5pM	H3	NA
CTTGTA	CGATGT	296	12	A	12	98	sAg	NA	H3	NA
CTTGTA	GCCAAT	13276	12	A	12	98	Norm.bc	1pM	H3	NA
GAATGC	ACAGTG	126286	91	H	7	129	Norm.bc	10pM	H3	NA
GAATGC	ATCACG	131	91	H	7	129	eAg	NA	H3	NA
GAATGC	CAGATC	2460	91	H	7	129	Norm.bc	0.5pM	H3	NA
GAATGC	CGATGT	281	91	H	7	129	sAg	NA	H3	NA
GAATGC	GCCAAT	12395	91	H	7	129	Norm.bc	1pM	H3	NA
GACGAC	ACAGTG	153395	41	D	5	103	Norm.bc	10pM	H3	NA
GACGAC	ATCACG	101	41	D	5	103	eAg	NA	H3	NA
GACGAC	CAGATC	3020	41	D	5	103	Norm.bc	0.5pM	H3	NA
GACGAC	CGATGT	345	41	D	5	103	sAg	NA	H3	NA
GACGAC	GCCAAT	15075	41	D	5	103	Norm.bc	1pM	H3	NA
GACGAT	ACAGTG	116619	62	F	2	112	Norm.bc	10pM	H3	NA
GACGAT	ATCACG	54	62	F	2	112	eAg	NA	H3	NA
GACGAT	CAGATC	2226	62	F	2	112	Norm.bc	0.5pM	H3	NA
GACGAT	CGATGT	251	62	F	2	112	sAg	NA	H3	NA
GACGAT	GCCAAT	11388	62	F	2	112	Norm.bc	1pM	H3	NA
GAGCGC	ACAGTG	117432	66	F	6	116	Norm.bc	10pM	H3	NA
GAGCGC	ATCACG	140	66	F	6	116	eAg	NA	H3	NA
GAGCGC	CAGATC	2184	66	F	6	116	Norm.bc	0.5pM	H3	NA
GAGCGC	CGATGT	247	66	F	6	116	sAg	NA	H3	NA
GAGCGC	GCCAAT	11366	66	F	6	116	Norm.bc	1pM	H3	NA
GAGTCT	ACAGTG	83745	69	F	9	119	Norm.bc	10pM	H3	NA
GAGTCT	ATCACG	74	69	F	9	119	eAg	NA	H3	NA
GAGTCT	CAGATC	1640	69	F	9	119	Norm.bc	0.5pM	H3	NA
GAGTCT	CGATGT	218	69	F	9	119	sAg	NA	H3	NA
GAGTCT	GCCAAT	8171	69	F	9	119	Norm.bc	1pM	H3	NA
GAGTGG	ACAGTG	107613	23	B	11	97	Norm.bc	10pM	H3	NA
GAGTGG	ATCACG	1693	23	B	11	97	eAg	NA	H3	NA
GAGTGG	CAGATC	2073	23	B	11	97	Norm.bc	0.5pM	H3	NA
GAGTGG	CGATGT	1254	23	B	11	97	sAg	NA	H3	NA
GAGTGG	GCCAAT	10768	23	B	11	97	Norm.bc	1pM	H3	NA
GATCAG	ACAGTG	153327	9	A	9	95	Norm.bc	10pM	H3	NA
GATCAG	ATCACG	162	9	A	9	95	eAg	NA	H3	NA
GATCAG	CAGATC	3016	9	A	9	95	Norm.bc	0.5pM	H3	NA
GATCAG	CGATGT	381	9	A	9	95	sAg	NA	H3	NA
GATCAG	GCCAAT	15259	9	A	9	95	Norm.bc	1pM	H3	NA
GCCAAT	ACAGTG	146779	6	A	6	92	Norm.bc	10pM	H3	NA
GCCAAT	ATCACG	49	6	A	6	92	eAg	NA	H3	NA
GCCAAT	CAGATC	2786	6	A	6	92	Norm.bc	0.5pM	H3	NA
GCCAAT	CGATGT	258	6	A	6	92	sAg	NA	H3	NA
GCCAAT	GCCAAT	14568	6	A	6	92	Norm.bc	1pM	H3	NA
GGAGAA	ACAGTG	143647	73	G	1	123	Norm.bc	10pM	H3	NA
GGAGAA	ATCACG	119	73	G	1	123	eAg	NA	H3	NA
GGAGAA	CAGATC	2836	73	G	1	123	Norm.bc	0.5pM	H3	NA
GGAGAA	CGATGT	452	73	G	1	123	sAg	NA	H3	NA
GGAGAA	GCCAAT	14053	73	G	1	123	Norm.bc	1pM	H3	NA
GGCTAC	ACAGTG	96421	11	A	11	97	Norm.bc	10pM	H3	NA
GGCTAC	ATCACG	1443	11	A	11	97	eAg	NA	H3	NA
GGCTAC	CAGATC	1869	11	A	11	97	Norm.bc	0.5pM	H3	NA
GGCTAC	CGATGT	1009	11	A	11	97	sAg	NA	H3	NA
GGCTAC	GCCAAT	9646	11	A	11	97	Norm.bc	1pM	H3	NA
GGTAGC	ACAGTG	150911	24	B	12	98	Norm.bc	10pM	H3	NA
GGTAGC	ATCACG	137	24	B	12	98	eAg	NA	H3	NA
GGTAGC	CAGATC	2996	24	B	12	98	Norm.bc	0.5pM	H3	NA
GGTAGC	CGATGT	314	24	B	12	98	sAg	NA	H3	NA
GGTAGC	GCCAAT	15123	24	B	12	98	Norm.bc	1pM	H3	NA
GTACTT	ACAGTG	133225	49	E	1	111	Norm.bc	10pM	H3	NA
GTACTT	ATCACG	164	49	E	1	111	eAg	NA	H3	NA
GTACTT	CAGATC	2589	49	E	1	111	Norm.bc	0.5pM	H3	NA
GTACTT	CGATGT	345	49	E	1	111	sAg	NA	H3	NA
GTACTT	GCCAAT	13187	49	E	1	111	Norm.bc	1pM	H3	NA
GTAGAG	ACAGTG	144053	17	B	5	91	Norm.bc	10pM	H3	NA
GTAGAG	ATCACG	49	17	B	5	91	eAg	NA	H3	NA
GTAGAG	CAGATC	2859	17	B	5	91	Norm.bc	0.5pM	H3	NA
GTAGAG	CGATGT	287	17	B	5	91	sAg	NA	H3	NA
GTAGAG	GCCAAT	14311	17	B	5	91	Norm.bc	1pM	H3	NA
GTCCGC	ACAGTG	120212	18	B	6	92	Norm.bc	10pM	H3	NA
GTCCGC	ATCACG	34	18	B	6	92	eAg	NA	H3	NA
GTCCGC	CAGATC	2313	18	B	6	92	Norm.bc	0.5pM	H3	NA
GTCCGC	CGATGT	222	18	B	6	92	sAg	NA	H3	NA
GTCCGC	GCCAAT	11921	18	B	6	92	Norm.bc	1pM	H3	NA
GTGAAA	ACAGTG	131128	19	B	7	93	Norm.bc	10pM	H3	NA
GTGAAA	ATCACG	141	19	B	7	93	eAg	NA	H3	NA
GTGAAA	CAGATC	2503	19	B	7	93	Norm.bc	0.5pM	H3	NA
GTGAAA	CGATGT	360	19	B	7	93	sAg	NA	H3	NA
GTGAAA	GCCAAT	12963	19	B	7	93	Norm.bc	1pM	H3	NA
GTGAGA	ACAGTG	142108	87	H	3	125	Norm.bc	10pM	H3	NA
GTGAGA	ATCACG	191	87	H	3	125	eAg	NA	H3	NA
GTGAGA	CAGATC	2755	87	H	3	125	Norm.bc	0.5pM	H3	NA
GTGAGA	CGATGT	310	87	H	3	125	sAg	NA	H3	NA
GTGAGA	GCCAAT	14151	87	H	3	125	Norm.bc	1pM	H3	NA
GTGGCC	ACAGTG	133880	20	B	8	94	Norm.bc	10pM	H3	NA
GTGGCC	ATCACG	124	20	B	8	94	eAg	NA	H3	NA
GTGGCC	CAGATC	2664	20	B	8	94	Norm.bc	0.5pM	H3	NA
GTGGCC	CGATGT	302	20	B	8	94	sAg	NA	H3	NA
GTGGCC	GCCAAT	13462	20	B	8	94	Norm.bc	1pM	H3	NA
GTGTAT	ACAGTG	137185	90	H	6	128	Norm.bc	10pM	H3	NA
GTGTAT	ATCACG	94	90	H	6	128	eAg	NA	H3	NA
GTGTAT	CAGATC	2741	90	H	6	128	Norm.bc	0.5pM	H3	NA
GTGTAT	CGATGT	294	90	H	6	128	sAg	NA	H3	NA
GTGTAT	GCCAAT	13730	90	H	6	128	Norm.bc	1pM	H3	NA
GTTTCG	ACAGTG	142253	21	B	9	95	Norm.bc	10pM	H3	NA
GTTTCG	ATCACG	153	21	B	9	95	eAg	NA	H3	NA
GTTTCG	CAGATC	2811	21	B	9	95	Norm.bc	0.5pM	H3	NA
GTTTCG	CGATGT	358	21	B	9	95	sAg	NA	H3	NA
GTTTCG	GCCAAT	14053	21	B	9	95	Norm.bc	1pM	H3	NA
TAACCG	ACAGTG	142620	77	G	5	127	Norm.bc	10pM	H3	NA
TAACCG	ATCACG	2430	77	G	5	127	eAg	NA	H3	NA
TAACCG	CAGATC	2667	77	G	5	127	Norm.bc	0.5pM	H3	NA
TAACCG	CGATGT	5098	77	G	5	127	sAg	NA	H3	NA
TAACCG	GCCAAT	13796	77	G	5	127	Norm.bc	1pM	H3	NA
TAAGAC	ACAGTG	132853	88	H	4	126	Norm.bc	10pM	H3	NA
TAAGAC	ATCACG	78	88	H	4	126	eAg	NA	H3	NA
TAAGAC	CAGATC	2621	88	H	4	126	Norm.bc	0.5pM	H3	NA
TAAGAC	CGATGT	406	88	H	4	126	sAg	NA	H3	NA
TAAGAC	GCCAAT	13179	88	H	4	126	Norm.bc	1pM	H3	NA
TAATCG	ACAGTG	116224	42	D	6	104	Norm.bc	10pM	H3	NA
TAATCG	ATCACG	78	42	D	6	104	eAg	NA	H3	NA
TAATCG	CAGATC	2270	42	D	6	104	Norm.bc	0.5pM	H3	NA
TAATCG	CGATGT	254	42	D	6	104	sAg	NA	H3	NA
TAATCG	GCCAAT	11443	42	D	6	104	Norm.bc	1pM	H3	NA
TACAGC	ACAGTG	123270	43	D	7	105	Norm.bc	10pM	H3	NA
TACAGC	ATCACG	248	43	D	7	105	eAg	NA	H3	NA
TACAGC	CAGATC	2413	43	D	7	105	Norm.bc	0.5pM	H3	NA
TACAGC	CGATGT	36727	43	D	7	105	sAg	NA	H3	NA
TACAGC	GCCAAT	12131	43	D	7	105	Norm.bc	1pM	H3	NA
TACCTT	ACAGTG	132044	65	F	5	115	Norm.bc	10pM	H3	NA
TACCTT	ATCACG	151	65	F	5	115	eAg	NA	H3	NA
TACCTT	CAGATC	2498	65	F	5	115	Norm.bc	0.5pM	H3	NA
TACCTT	CGATGT	420	65	F	5	115	sAg	NA	H3	NA
TACCTT	GCCAAT	12895	65	F	5	115	Norm.bc	1pM	H3	NA
TAGCTT	ACAGTG	138569	10	A	10	96	Norm.bc	10pM	H3	NA
TAGCTT	ATCACG	200	10	A	10	96	eAg	NA	H3	NA
TAGCTT	CAGATC	2668	10	A	10	96	Norm.bc	0.5pM	H3	NA
TAGCTT	CGATGT	294	10	A	10	96	sAg	NA	H3	NA
TAGCTT	GCCAAT	13775	10	A	10	96	Norm.bc	1pM	H3	NA
TATAAT	ACAGTG	124640	44	D	8	106	Norm.bc	10pM	H3	NA
TATAAT	ATCACG	110	44	D	8	106	eAg	NA	H3	NA
TATAAT	CAGATC	2406	44	D	8	106	Norm.bc	0.5pM	H3	NA
TATAAT	CGATGT	329	44	D	8	106	sAg	NA	H3	NA
TATAAT	GCCAAT	12401	44	D	8	106	Norm.bc	1pM	H3	NA
TATATC	ACAGTG	138573	53	E	5	115	Norm.bc	10pM	H3	NA
TATATC	ATCACG	139	53	E	5	115	eAg	NA	H3	NA
TATATC	CAGATC	2667	53	E	5	115	Norm.bc	0.5pM	H3	NA
TATATC	CGATGT	341	53	E	5	115	sAg	NA	H3	NA
TATATC	GCCAAT	13545	53	E	5	115	Norm.bc	1pM	H3	NA
TATGCA	ACAGTG	146085	75	G	3	125	Norm.bc	10pM	H3	NA
TATGCA	ATCACG	149	75	G	3	125	eAg	NA	H3	NA
TATGCA	CAGATC	2864	75	G	3	125	Norm.bc	0.5pM	H3	NA
TATGCA	CGATGT	317	75	G	3	125	sAg	NA	H3	NA
TATGCA	GCCAAT	14425	75	G	3	125	Norm.bc	1pM	H3	NA
TATTAT	ACAGTG	141171	54	E	6	116	Norm.bc	10pM	H3	NA
TATTAT	ATCACG	242	54	E	6	116	eAg	NA	H3	NA
TATTAT	CAGATC	2740	54	E	6	116	Norm.bc	0.5pM	H3	NA
TATTAT	CGATGT	293	54	E	6	116	sAg	NA	H3	NA
TATTAT	GCCAAT	13830	54	E	6	116	Norm.bc	1pM	H3	NA
TCATTC	ACAGTG	127069	45	D	9	107	Norm.bc	10pM	H3	NA
TCATTC	ATCACG	113	45	D	9	107	eAg	NA	H3	NA
TCATTC	CAGATC	2399	45	D	9	107	Norm.bc	0.5pM	H3	NA
TCATTC	CGATGT	224	45	D	9	107	sAg	NA	H3	NA
TCATTC	GCCAAT	12763	45	D	9	107	Norm.bc	1pM	H3	NA
TCCACA	ACAGTG	113284	56	E	8	118	Norm.bc	10pM	H3	NA
TCCACA	ATCACG	93	56	E	8	118	eAg	NA	H3	NA
TCCACA	CAGATC	2230	56	E	8	118	Norm.bc	0.5pM	H3	NA
TCCACA	CGATGT	240	56	E	8	118	sAg	NA	H3	NA
TCCACA	GCCAAT	11208	56	E	8	118	Norm.bc	1pM	H3	NA
TCCCGA	ACAGTG	128032	46	D	10	108	Norm.bc	10pM	H3	NA
TCCCGA	ATCACG	1731	46	D	10	108	eAg	NA	H3	NA
TCCCGA	CAGATC	2462	46	D	10	108	Norm.bc	0.5pM	H3	NA
TCCCGA	CGATGT	374	46	D	10	108	sAg	NA	H3	NA
TCCCGA	GCCAAT	12601	46	D	10	108	Norm.bc	1pM	H3	NA
TCCTGC	ACAGTG	110392	58	E	10	120	Norm.bc	10pM	H3	NA
TCCTGC	ATCACG	166	58	E	10	120	eAg	NA	H3	NA
TCCTGC	CAGATC	2103	58	E	10	120	Norm.bc	0.5pM	H3	NA
TCCTGC	CGATGT	531	58	E	10	120	sAg	NA	H3	NA
TCCTGC	GCCAAT	10918	58	E	10	120	Norm.bc	1pM	H3	NA
TCGAAG	ACAGTG	110831	47	D	11	109	Norm.bc	10pM	H3	NA
TCGAAG	ATCACG	164	47	D	11	109	eAg	NA	H3	NA
TCGAAG	CAGATC	2101	47	D	11	109	Norm.bc	0.5pM	H3	NA
TCGAAG	CGATGT	378	47	D	11	109	sAg	NA	H3	NA
TCGAAG	GCCAAT	11112	47	D	11	109	Norm.bc	1pM	H3	NA
TCGGCA	ACAGTG	108938	48	D	12	110	Norm.bc	10pM	H3	NA
TCGGCA	ATCACG	86	48	D	12	110	eAg	NA	H3	NA
TCGGCA	CAGATC	2078	48	D	12	110	Norm.bc	0.5pM	H3	NA
TCGGCA	CGATGT	471	48	D	12	110	sAg	NA	H3	NA
TCGGCA	GCCAAT	10778	48	D	12	110	Norm.bc	1pM	H3	NA
TGACCA	ACAGTG	129112	4	A	4	90	Norm.bc	10pM	H3	NA
TGACCA	ATCACG	72	4	A	4	90	eAg	NA	H3	NA
TGACCA	CAGATC	2484	4	A	4	90	Norm.bc	0.5pM	H3	NA
TGACCA	CGATGT	221	4	A	4	90	sAg	NA	H3	NA
TGACCA	GCCAAT	12878	4	A	4	90	Norm.bc	1pM	H3	NA
TGCGCT	ACAGTG	123508	60	E	12	122	Norm.bc	10pM	H3	NA
TGCGCT	ATCACG	3849	60	E	12	122	eAg	NA	H3	NA
TGCGCT	CAGATC	2408	60	E	12	122	Norm.bc	0.5pM	H3	NA
TGCGCT	CGATGT	2933	60	E	12	122	sAg	NA	H3	NA
TGCGCT	GCCAAT	12281	60	E	12	122	Norm.bc	1pM	H3	NA
TGGAGC	ACAGTG	119069	79	G	7	129	Norm.bc	10pM	H3	NA
TGGAGC	ATCACG	95	79	G	7	129	eAg	NA	H3	NA
TGGAGC	CAGATC	2309	79	G	7	129	Norm.bc	0.5pM	H3	NA
TGGAGC	CGATGT	242	79	G	7	129	sAg	NA	H3	NA
TGGAGC	GCCAAT	11791	79	G	7	129	Norm.bc	1pM	H3	NA
TTAGGC	ACAGTG	106315	3	A	3	89	Norm.bc	10pM	H3	NA
TTAGGC	ATCACG	541	3	A	3	89	eAg	NA	H3	NA
TTAGGC	CAGATC	1986	3	A	3	89	Norm.bc	0.5pM	H3	NA
TTAGGC	CGATGT	1164	3	A	3	89	sAg	NA	H3	NA
TTAGGC	GCCAAT	10492	3	A	3	89	Norm.bc	1pM	H3	NA
TTCTCG	ACAGTG	92742	57	E	9	119	Norm.bc	10pM	H3	NA
TTCTCG	ATCACG	109	57	E	9	119	eAg	NA	H3	NA
TTCTCG	CAGATC	1866	57	E	9	119	Norm.bc	0.5pM	H3	NA
TTCTCG	CGATGT	247	57	E	9	119	sAg	NA	H3	NA
TTCTCG	GCCAAT	9330	57	E	9	119	Norm.bc	1pM	H3	NA
TTGCGG	ACAGTG	114890	63	F	3	113	Norm.bc	10pM	H3	NA
TTGCGG	ATCACG	213	63	F	3	113	eAg	NA	H3	NA
TTGCGG	CAGATC	2276	63	F	3	113	Norm.bc	0.5pM	H3	NA
TTGCGG	CGATGT	35446	63	F	3	113	sAg	NA	H3	NA
TTGCGG	GCCAAT	11173	63	F	3	113	Norm.bc	1pM	H3	NA
AACGGA	ACAGTG	177450	61	F	1	154	Norm.bc	10pM	H4	NA
AACGGA	ATCACG	184	61	F	1	154	eAg	NA	H4	NA
AACGGA	CAGATC	3462	61	F	1	154	Norm.bc	0.5pM	H4	NA
AACGGA	CGATGT	435	61	F	1	154	sAg	NA	H4	NA
AACGGA	GCCAAT	17457	61	F	1	154	Norm.bc	1pM	H4	NA
AAGGAG	ACAGTG	198359	51	E	3	156	Norm.bc	10pM	H4	NA
AAGGAG	ATCACG	227	51	E	3	156	eAg	NA	H4	NA
AAGGAG	CAGATC	3910	51	E	3	156	Norm.bc	0.5pM	H4	NA
AAGGAG	CGATGT	25222	51	E	3	156	sAg	NA	H4	NA
AAGGAG	GCCAAT	19385	51	E	3	156	Norm.bc	1pM	H4	NA
AATCGT	ACAGTG	154790	68	F	8	161	Norm.bc	10pM	H4	NA
AATCGT	ATCACG	112	68	F	8	161	eAg	NA	H4	NA
AATCGT	CAGATC	2905	68	F	8	161	Norm.bc	0.5pM	H4	NA
AATCGT	CGATGT	268	68	F	8	161	sAg	NA	H4	NA
AATCGT	GCCAAT	15203	68	F	8	161	Norm.bc	1pM	H4	NA
AATTCC	ACAGTG	174384	71	F	11	164	Norm.bc	10pM	H4	NA
AATTCC	ATCACG	74	71	F	11	164	eAg	NA	H4	NA
AATTCC	CAGATC	3393	71	F	11	164	Norm.bc	0.5pM	H4	NA
AATTCC	CGATGT	348	71	F	11	164	sAg	NA	H4	NA
AATTCC	GCCAAT	17165	71	F	11	164	Norm.bc	1pM	H4	NA
ACAGTG	ACAGTG	243853	5	A	5	134	Norm.bc	10pM	H4	NA
ACAGTG	ATCACG	825	5	A	5	134	eAg	NA	H4	NA
ACAGTG	CAGATC	4589	5	A	5	134	Norm.bc	0.5pM	H4	NA
ACAGTG	CGATGT	504	5	A	5	134	sAg	NA	H4	NA
ACAGTG	GCCAAT	23981	5	A	5	134	Norm.bc	1pM	H4	NA
ACGAGG	ACAGTG	194346	67	F	7	160	Norm.bc	10pM	H4	NA
ACGAGG	ATCACG	102	67	F	7	160	eAg	NA	H4	NA
ACGAGG	CAGATC	3606	67	F	7	160	Norm.bc	0.5pM	H4	NA
ACGAGG	CGATGT	332	67	F	7	160	sAg	NA	H4	NA
ACGAGG	GCCAAT	19244	67	F	7	160	Norm.bc	1pM	H4	NA
ACTGAT	ACAGTG	193967	25	C	1	142	Norm.bc	10pM	H4	NA
ACTGAT	ATCACG	12327	25	C	1	142	eAg	NA	H4	NA
ACTGAT	CAGATC	3742	25	C	1	142	Norm.bc	0.5pM	H4	NA
ACTGAT	CGATGT	8371	25	C	1	142	sAg	NA	H4	NA
ACTGAT	GCCAAT	18970	25	C	1	142	Norm.bc	1pM	H4	NA
ACTTGA	ACAGTG	204940	8	A	8	137	Norm.bc	10pM	H4	NA
ACTTGA	ATCACG	550	8	A	8	137	eAg	NA	H4	NA
ACTTGA	CAGATC	3928	8	A	8	137	Norm.bc	0.5pM	H4	NA
ACTTGA	CGATGT	1727	8	A	8	137	sAg	NA	H4	NA
ACTTGA	GCCAAT	20124	8	A	8	137	Norm.bc	1pM	H4	NA
AGACCA	ACAGTG	103647	70	F	10	163	Norm.bc	10pM	H4	NA
AGACCA	ATCACG	136	70	F	10	163	eAg	NA	H4	NA
AGACCA	CAGATC	1961	70	F	10	163	Norm.bc	0.5pM	H4	NA
AGACCA	CGATGT	291	70	F	10	163	sAg	NA	H4	NA
AGACCA	GCCAAT	10240	70	F	10	163	Norm.bc	1pM	H4	NA
AGATGT	ACAGTG	176594	72	F	12	165	Norm.bc	10pM	H4	NA
AGATGT	ATCACG	149	72	F	12	165	eAg	NA	H4	NA
AGATGT	CAGATC	3401	72	F	12	165	Norm.bc	0.5pM	H4	NA
AGATGT	CGATGT	802	72	F	12	165	sAg	NA	H4	NA
AGATGT	GCCAAT	17573	72	F	12	165	Norm.bc	1pM	H4	NA
AGCACC	ACAGTG	178572	55	E	7	160	Norm.bc	10pM	H4	NA
AGCACC	ATCACG	76	55	E	7	160	eAg	NA	H4	NA
AGCACC	CAGATC	3424	55	E	7	160	Norm.bc	0.5pM	H4	NA
AGCACC	CGATGT	316	55	E	7	160	sAg	NA	H4	NA
AGCACC	GCCAAT	17463	55	E	7	160	Norm.bc	1pM	H4	NA
AGTCAA	ACAGTG	157805	13	B	1	130	Norm.bc	10pM	H4	NA
AGTCAA	ATCACG	304	13	B	1	130	eAg	NA	H4	NA
AGTCAA	CAGATC	3106	13	B	1	130	Norm.bc	0.5pM	H4	NA
AGTCAA	CGATGT	904	13	B	1	130	sAg	NA	H4	NA
AGTCAA	GCCAAT	15676	13	B	1	130	Norm.bc	1pM	H4	NA
AGTCTC	ACAGTG	173246	78	G	6	171	Norm.bc	10pM	H4	NA
AGTCTC	ATCACG	104	78	G	6	171	eAg	NA	H4	NA
AGTCTC	CAGATC	3264	78	G	6	171	Norm.bc	0.5pM	H4	NA
AGTCTC	CGATGT	368	78	G	6	171	sAg	NA	H4	NA
AGTCTC	GCCAAT	17143	78	G	6	171	Norm.bc	1pM	H4	NA
AGTTCC	ACAGTG	159470	14	B	2	131	Norm.bc	10pM	H4	NA
AGTTCC	ATCACG	105	14	B	2	131	eAg	NA	H4	NA
AGTTCC	CAGATC	2998	14	B	2	131	Norm.bc	0.5pM	H4	NA
AGTTCC	CGATGT	375	14	B	2	131	sAg	NA	H4	NA
AGTTCC	GCCAAT	15790	14	B	2	131	Norm.bc	1pM	H4	NA
ATAGAT	ACAGTG	131083	74	G	2	167	Norm.bc	10pM	H4	NA
ATAGAT	ATCACG	88	74	G	2	167	eAg	NA	H4	NA
ATAGAT	CAGATC	2537	74	G	2	167	Norm.bc	0.5pM	H4	NA
ATAGAT	CGATGT	330	74	G	2	167	sAg	NA	H4	NA
ATAGAT	GCCAAT	12782	74	G	2	167	Norm.bc	1pM	H4	NA
ATCACG	ACAGTG	225368	1	A	1	130	Norm.bc	10pM	H4	NA
ATCACG	ATCACG	235	1	A	1	130	eAg	NA	H4	NA
ATCACG	CAGATC	4311	1	A	1	130	Norm.bc	0.5pM	H4	NA
ATCACG	CGATGT	769	1	A	1	130	sAg	NA	H4	NA
ATCACG	GCCAAT	22332	1	A	1	130	Norm.bc	1pM	H4	NA
ATCCAA	ACAGTG	204311	86	H	2	167	Norm.bc	10pM	H4	NA
ATCCAA	ATCACG	146	86	H	2	167	eAg	NA	H4	NA
ATCCAA	CAGATC	3958	86	H	2	167	Norm.bc	0.5pM	H4	NA
ATCCAA	CGATGT	551	86	H	2	167	sAg	NA	H4	NA
ATCCAA	GCCAAT	20193	86	H	2	167	Norm.bc	1pM	H4	NA
ATGAGC	ACAGTG	234522	26	C	2	143	Norm.bc	10pM	H4	NA
ATGAGC	ATCACG	155	26	C	2	143	eAg	NA	H4	NA
ATGAGC	CAGATC	4603	26	C	2	143	Norm.bc	0.5pM	H4	NA
ATGAGC	CGATGT	400	26	C	2	143	sAg	NA	H4	NA
ATGAGC	GCCAAT	23282	26	C	2	143	Norm.bc	1pM	H4	NA
ATGGCA	ACAGTG	168221	50	E	2	155	Norm.bc	10pM	H4	NA
ATGGCA	ATCACG	118	50	E	2	155	eAg	NA	H4	NA
ATGGCA	CAGATC	3268	50	E	2	155	Norm.bc	0.5pM	H4	NA
ATGGCA	CGATGT	387	50	E	2	155	sAg	NA	H4	NA
ATGGCA	GCCAAT	16714	50	E	2	155	Norm.bc	1pM	H4	NA
ATGTCA	ACAGTG	172078	15	B	3	132	Norm.bc	10pM	H4	NA
ATGTCA	ATCACG	233	15	B	3	132	eAg	NA	H4	NA
ATGTCA	CAGATC	3313	15	B	3	132	Norm.bc	0.5pM	H4	NA
ATGTCA	CGATGT	1025	15	B	3	132	sAg	NA	H4	NA
ATGTCA	GCCAAT	16984	15	B	3	132	Norm.bc	1pM	H4	NA
ATTCCT	ACAGTG	144436	27	C	3	144	Norm.bc	10pM	H4	NA
ATTCCT	ATCACG	79	27	C	3	144	eAg	NA	H4	NA
ATTCCT	CAGATC	2757	27	C	3	144	Norm.bc	0.5pM	H4	NA
ATTCCT	CGATGT	314	27	C	3	144	sAg	NA	H4	NA
ATTCCT	GCCAAT	14174	27	C	3	144	Norm.bc	1pM	H4	NA
CAAAAG	ACAGTG	177710	28	C	4	145	Norm.bc	10pM	H4	NA
CAAAAG	ATCACG	163	28	C	4	145	eAg	NA	H4	NA
CAAAAG	CAGATC	3447	28	C	4	145	Norm.bc	0.5pM	H4	NA
CAAAAG	CGATGT	372	28	C	4	145	sAg	NA	H4	NA
CAAAAG	GCCAAT	17298	28	C	4	145	Norm.bc	1pM	H4	NA
CAACTA	ACAGTG	179854	29	C	5	146	Norm.bc	10pM	H4	NA
CAACTA	ATCACG	123	29	C	5	146	eAg	NA	H4	NA
CAACTA	CAGATC	3399	29	C	5	146	Norm.bc	0.5pM	H4	NA
CAACTA	CGATGT	296	29	C	5	146	sAg	NA	H4	NA
CAACTA	GCCAAT	17780	29	C	5	146	Norm.bc	1pM	H4	NA
CAAGTT	ACAGTG	224671	64	F	4	157	Norm.bc	10pM	H4	NA
CAAGTT	ATCACG	134	64	F	4	157	eAg	NA	H4	NA
CAAGTT	CAGATC	4384	64	F	4	157	Norm.bc	0.5pM	H4	NA
CAAGTT	CGATGT	400	64	F	4	157	sAg	NA	H4	NA
CAAGTT	GCCAAT	22100	64	F	4	157	Norm.bc	1pM	H4	NA
CACCGG	ACAGTG	183989	30	C	6	147	Norm.bc	10pM	H4	NA
CACCGG	ATCACG	128	30	C	6	147	eAg	NA	H4	NA
CACCGG	CAGATC	3495	30	C	6	147	Norm.bc	0.5pM	H4	NA
CACCGG	CGATGT	262	30	C	6	147	sAg	NA	H4	NA
CACCGG	GCCAAT	18140	30	C	6	147	Norm.bc	1pM	H4	NA
CACGAT	ACAGTG	147560	31	C	7	148	Norm.bc	10pM	H4	NA
CACGAT	ATCACG	119	31	C	7	148	eAg	NA	H4	NA
CACGAT	CAGATC	2815	31	C	7	148	Norm.bc	0.5pM	H4	NA
CACGAT	CGATGT	282	31	C	7	148	sAg	NA	H4	NA
CACGAT	GCCAAT	14324	31	C	7	148	Norm.bc	1pM	H4	NA
CACTCA	ACAGTG	190132	32	C	8	149	Norm.bc	10pM	H4	NA
CACTCA	ATCACG	166	32	C	8	149	eAg	NA	H4	NA
CACTCA	CAGATC	3605	32	C	8	149	Norm.bc	0.5pM	H4	NA
CACTCA	CGATGT	310	32	C	8	149	sAg	NA	H4	NA
CACTCA	GCCAAT	18762	32	C	8	149	Norm.bc	1pM	H4	NA
CAGATC	ACAGTG	257867	7	A	7	136	Norm.bc	10pM	H4	NA
CAGATC	ATCACG	186	7	A	7	136	eAg	NA	H4	NA
CAGATC	CAGATC	4926	7	A	7	136	Norm.bc	0.5pM	H4	NA
CAGATC	CGATGT	471	7	A	7	136	sAg	NA	H4	NA
CAGATC	GCCAAT	25730	7	A	7	136	Norm.bc	1pM	H4	NA
CAGGCG	ACAGTG	163838	33	C	9	150	Norm.bc	10pM	H4	NA
CAGGCG	ATCACG	419	33	C	9	150	eAg	NA	H4	NA
CAGGCG	CAGATC	3201	33	C	9	150	Norm.bc	0.5pM	H4	NA
CAGGCG	CGATGT	386	33	C	9	150	sAg	NA	H4	NA
CAGGCG	GCCAAT	16324	33	C	9	150	Norm.bc	1pM	H4	NA
CATGGC	ACAGTG	113428	34	C	10	151	Norm.bc	10pM	H4	NA
CATGGC	ATCACG	203	34	C	10	151	eAg	NA	H4	NA
CATGGC	CAGATC	2192	34	C	10	151	Norm.bc	0.5pM	H4	NA
CATGGC	CGATGT	450	34	C	10	151	sAg	NA	H4	NA
CATGGC	GCCAAT	10924	34	C	10	151	Norm.bc	1pM	H4	NA
CATTTT	ACAGTG	160214	35	C	11	152	Norm.bc	10pM	H4	NA
CATTTT	ATCACG	207	35	C	11	152	eAg	NA	H4	NA
CATTTT	CAGATC	3055	35	C	11	152	Norm.bc	0.5pM	H4	NA
CATTTT	CGATGT	456	35	C	11	152	sAg	NA	H4	NA
CATTTT	GCCAAT	15819	35	C	11	152	Norm.bc	1pM	H4	NA
CCAACA	ACAGTG	205964	36	C	12	153	Norm.bc	10pM	H4	NA
CCAACA	ATCACG	180	36	C	12	153	eAg	NA	H4	NA
CCAACA	CAGATC	3881	36	C	12	153	Norm.bc	0.5pM	H4	NA
CCAACA	CGATGT	642	36	C	12	153	sAg	NA	H4	NA
CCAACA	GCCAAT	20467	36	C	12	153	Norm.bc	1pM	H4	NA
CCGTCC	ACAGTG	140306	16	B	4	133	Norm.bc	10pM	H4	NA
CCGTCC	ATCACG	142	16	B	4	133	eAg	NA	H4	NA
CCGTCC	CAGATC	2611	16	B	4	133	Norm.bc	0.5pM	H4	NA
CCGTCC	CGATGT	282	16	B	4	133	sAg	NA	H4	NA
CCGTCC	GCCAAT	13786	16	B	4	133	Norm.bc	1pM	H4	NA
CCTATT	ACAGTG	157394	76	G	4	169	Norm.bc	10pM	H4	NA
CCTATT	ATCACG	136	76	G	4	169	eAg	NA	H4	NA
CCTATT	CAGATC	3009	76	G	4	169	Norm.bc	0.5pM	H4	NA
CCTATT	CGATGT	313	76	G	4	169	sAg	NA	H4	NA
CCTATT	GCCAAT	15819	76	G	4	169	Norm.bc	1pM	H4	NA
CGATGT	ACAGTG	284995	2	A	2	131	Norm.bc	10pM	H4	NA
CGATGT	ATCACG	147	2	A	2	131	eAg	NA	H4	NA
CGATGT	CAGATC	5403	2	A	2	131	Norm.bc	0.5pM	H4	NA
CGATGT	CGATGT	720	2	A	2	131	sAg	NA	H4	NA
CGATGT	GCCAAT	28349	2	A	2	131	Norm.bc	1pM	H4	NA
CGCGGC	ACAGTG	139024	59	E	11	164	Norm.bc	10pM	H4	NA
CGCGGC	ATCACG	44	59	E	11	164	eAg	NA	H4	NA
CGCGGC	CAGATC	2625	59	E	11	164	Norm.bc	0.5pM	H4	NA
CGCGGC	CGATGT	259	59	E	11	164	sAg	NA	H4	NA
CGCGGC	GCCAAT	13873	59	E	11	164	Norm.bc	1pM	H4	NA
CGGAAT	ACAGTG	153577	37	D	1	142	Norm.bc	10pM	H4	NA
CGGAAT	ATCACG	9996	37	D	1	142	eAg	NA	H4	NA
CGGAAT	CAGATC	2942	37	D	1	142	Norm.bc	0.5pM	H4	NA
CGGAAT	CGATGT	6811	37	D	1	142	sAg	NA	H4	NA
CGGAAT	GCCAAT	14877	37	D	1	142	Norm.bc	1pM	H4	NA
CGTACG	ACAGTG	182085	22	B	10	139	Norm.bc	10pM	H4	NA
CGTACG	ATCACG	702	22	B	10	139	eAg	NA	H4	NA
CGTACG	CAGATC	3512	22	B	10	139	Norm.bc	0.5pM	H4	NA
CGTACG	CGATGT	672	22	B	10	139	sAg	NA	H4	NA
CGTACG	GCCAAT	17978	22	B	10	139	Norm.bc	1pM	H4	NA
CGTTAG	ACAGTG	169060	89	H	5	170	Norm.bc	10pM	H4	NA
CGTTAG	ATCACG	743	89	H	5	170	eAg	NA	H4	NA
CGTTAG	CAGATC	3179	89	H	5	170	Norm.bc	0.5pM	H4	NA
CGTTAG	CGATGT	580	89	H	5	170	sAg	NA	H4	NA
CGTTAG	GCCAAT	17042	89	H	5	170	Norm.bc	1pM	H4	NA
CTAAGG	ACAGTG	160522	85	H	1	166	Norm.bc	10pM	H4	NA
CTAAGG	ATCACG	119	85	H	1	166	eAg	NA	H4	NA
CTAAGG	CAGATC	3012	85	H	1	166	Norm.bc	0.5pM	H4	NA
CTAAGG	CGATGT	530	85	H	1	166	sAg	NA	H4	NA
CTAAGG	GCCAAT	15959	85	H	1	166	Norm.bc	1pM	H4	NA
CTAGCT	ACAGTG	185353	38	D	2	143	Norm.bc	10pM	H4	NA
CTAGCT	ATCACG	77	38	D	2	143	eAg	NA	H4	NA
CTAGCT	CAGATC	3430	38	D	2	143	Norm.bc	0.5pM	H4	NA
CTAGCT	CGATGT	233	38	D	2	143	sAg	NA	H4	NA
CTAGCT	GCCAAT	17990	38	D	2	143	Norm.bc	1pM	H4	NA
CTATAC	ACAGTG	182695	39	D	3	144	Norm.bc	10pM	H4	NA
CTATAC	ATCACG	110	39	D	3	144	eAg	NA	H4	NA
CTATAC	CAGATC	3427	39	D	3	144	Norm.bc	0.5pM	H4	NA
CTATAC	CGATGT	422	39	D	3	144	sAg	NA	H4	NA
CTATAC	GCCAAT	18033	39	D	3	144	Norm.bc	1pM	H4	NA
CTATCT	ACAGTG	251416	52	E	4	157	Norm.bc	10pM	H4	NA
CTATCT	ATCACG	147	52	E	4	157	eAg	NA	H4	NA
CTATCT	CAGATC	4774	52	E	4	157	Norm.bc	0.5pM	H4	NA
CTATCT	CGATGT	445	52	E	4	157	sAg	NA	H4	NA
CTATCT	GCCAAT	24808	52	E	4	157	Norm.bc	1pM	H4	NA
CTCAGA	ACAGTG	224488	40	D	4	145	Norm.bc	10pM	H4	NA
CTCAGA	ATCACG	169	40	D	4	145	eAg	NA	H4	NA
CTCAGA	CAGATC	4269	40	D	4	145	Norm.bc	0.5pM	H4	NA
CTCAGA	CGATGT	495	40	D	4	145	sAg	NA	H4	NA
CTCAGA	GCCAAT	22037	40	D	4	145	Norm.bc	1pM	H4	NA
CTTGTA	ACAGTG	172381	12	A	12	141	Norm.bc	10pM	H4	NA
CTTGTA	ATCACG	153	12	A	12	141	eAg	NA	H4	NA
CTTGTA	CAGATC	3303	12	A	12	141	Norm.bc	0.5pM	H4	NA
CTTGTA	CGATGT	820	12	A	12	141	sAg	NA	H4	NA
CTTGTA	GCCAAT	16993	12	A	12	141	Norm.bc	1pM	H4	NA
GAATGC	ACAGTG	149720	91	H	7	172	Norm.bc	10pM	H4	NA
GAATGC	ATCACG	125	91	H	7	172	eAg	NA	H4	NA
GAATGC	CAGATC	2829	91	H	7	172	Norm.bc	0.5pM	H4	NA
GAATGC	CGATGT	349	91	H	7	172	sAg	NA	H4	NA
GAATGC	GCCAAT	14715	91	H	7	172	Norm.bc	1pM	H4	NA
GACGAC	ACAGTG	157843	41	D	5	146	Norm.bc	10pM	H4	NA
GACGAC	ATCACG	77	41	D	5	146	eAg	NA	H4	NA
GACGAC	CAGATC	3032	41	D	5	146	Norm.bc	0.5pM	H4	NA
GACGAC	CGATGT	234	41	D	5	146	sAg	NA	H4	NA
GACGAC	GCCAAT	15459	41	D	5	146	Norm.bc	1pM	H4	NA
GACGAT	ACAGTG	202125	62	F	2	155	Norm.bc	10pM	H4	NA
GACGAT	ATCACG	180	62	F	2	155	eAg	NA	H4	NA
GACGAT	CAGATC	3912	62	F	2	155	Norm.bc	0.5pM	H4	NA
GACGAT	CGATGT	435	62	F	2	155	sAg	NA	H4	NA
GACGAT	GCCAAT	20329	62	F	2	155	Norm.bc	1pM	H4	NA
GAGCGC	ACAGTG	152045	66	F	6	159	Norm.bc	10pM	H4	NA
GAGCGC	ATCACG	72	66	F	6	159	eAg	NA	H4	NA
GAGCGC	CAGATC	2824	66	F	6	159	Norm.bc	0.5pM	H4	NA
GAGCGC	CGATGT	281	66	F	6	159	sAg	NA	H4	NA
GAGCGC	GCCAAT	15220	66	F	6	159	Norm.bc	1pM	H4	NA
GAGTCT	ACAGTG	230576	69	F	9	162	Norm.bc	10pM	H4	NA
GAGTCT	ATCACG	768	69	F	9	162	eAg	NA	H4	NA
GAGTCT	CAGATC	4569	69	F	9	162	Norm.bc	0.5pM	H4	NA
GAGTCT	CGATGT	1746	69	F	9	162	sAg	NA	H4	NA
GAGTCT	GCCAAT	23101	69	F	9	162	Norm.bc	1pM	H4	NA
GAGTGG	ACAGTG	127847	23	B	11	140	Norm.bc	10pM	H4	NA
GAGTGG	ATCACG	139	23	B	11	140	eAg	NA	H4	NA
GAGTGG	CAGATC	2493	23	B	11	140	Norm.bc	0.5pM	H4	NA
GAGTGG	CGATGT	365	23	B	11	140	sAg	NA	H4	NA
GAGTGG	GCCAAT	12676	23	B	11	140	Norm.bc	1pM	H4	NA
GATCAG	ACAGTG	230791	9	A	9	138	Norm.bc	10pM	H4	NA
GATCAG	ATCACG	180	9	A	9	138	eAg	NA	H4	NA
GATCAG	CAGATC	4386	9	A	9	138	Norm.bc	0.5pM	H4	NA
GATCAG	CGATGT	431	9	A	9	138	sAg	NA	H4	NA
GATCAG	GCCAAT	23400	9	A	9	138	Norm.bc	1pM	H4	NA
GCCAAT	ACAGTG	225660	6	A	6	135	Norm.bc	10pM	H4	NA
GCCAAT	ATCACG	334	6	A	6	135	eAg	NA	H4	NA
GCCAAT	CAGATC	4371	6	A	6	135	Norm.bc	0.5pM	H4	NA
GCCAAT	CGATGT	1050	6	A	6	135	sAg	NA	H4	NA
GCCAAT	GCCAAT	22559	6	A	6	135	Norm.bc	1pM	H4	NA
GGAGAA	ACAGTG	178258	73	G	1	166	Norm.bc	10pM	H4	NA
GGAGAA	ATCACG	146	73	G	1	166	eAg	NA	H4	NA
GGAGAA	CAGATC	3455	73	G	1	166	Norm.bc	0.5pM	H4	NA
GGAGAA	CGATGT	515	73	G	1	166	sAg	NA	H4	NA
GGAGAA	GCCAAT	17920	73	G	1	166	Norm.bc	1pM	H4	NA
GGCTAC	ACAGTG	252294	11	A	11	140	Norm.bc	10pM	H4	NA
GGCTAC	ATCACG	166	11	A	11	140	eAg	NA	H4	NA
GGCTAC	CAGATC	4852	11	A	11	140	Norm.bc	0.5pM	H4	NA
GGCTAC	CGATGT	416	11	A	11	140	sAg	NA	H4	NA
GGCTAC	GCCAAT	25153	11	A	11	140	Norm.bc	1pM	H4	NA
GGTAGC	ACAGTG	184669	24	B	12	141	Norm.bc	10pM	H4	NA
GGTAGC	ATCACG	162	24	B	12	141	eAg	NA	H4	NA
GGTAGC	CAGATC	3574	24	B	12	141	Norm.bc	0.5pM	H4	NA
GGTAGC	CGATGT	812	24	B	12	141	sAg	NA	H4	NA
GGTAGC	GCCAAT	18377	24	B	12	141	Norm.bc	1pM	H4	NA
GTACTT	ACAGTG	136219	49	E	1	154	Norm.bc	10pM	H4	NA
GTACTT	ATCACG	119	49	E	1	154	eAg	NA	H4	NA
GTACTT	CAGATC	2609	49	E	1	154	Norm.bc	0.5pM	H4	NA
GTACTT	CGATGT	298	49	E	1	154	sAg	NA	H4	NA
GTACTT	GCCAAT	13541	49	E	1	154	Norm.bc	1pM	H4	NA
GTAGAG	ACAGTG	157846	17	B	5	134	Norm.bc	10pM	H4	NA
GTAGAG	ATCACG	506	17	B	5	134	eAg	NA	H4	NA
GTAGAG	CAGATC	3083	17	B	5	134	Norm.bc	0.5pM	H4	NA
GTAGAG	CGATGT	344	17	B	5	134	sAg	NA	H4	NA
GTAGAG	GCCAAT	15351	17	B	5	134	Norm.bc	1pM	H4	NA
GTCCGC	ACAGTG	132627	18	B	6	135	Norm.bc	10pM	H4	NA
GTCCGC	ATCACG	170	18	B	6	135	eAg	NA	H4	NA
GTCCGC	CAGATC	2561	18	B	6	135	Norm.bc	0.5pM	H4	NA
GTCCGC	CGATGT	620	18	B	6	135	sAg	NA	H4	NA
GTCCGC	GCCAAT	12948	18	B	6	135	Norm.bc	1pM	H4	NA
GTGAAA	ACAGTG	149949	19	B	7	136	Norm.bc	10pM	H4	NA
GTGAAA	ATCACG	106	19	B	7	136	eAg	NA	H4	NA
GTGAAA	CAGATC	2878	19	B	7	136	Norm.bc	0.5pM	H4	NA
GTGAAA	CGATGT	283	19	B	7	136	sAg	NA	H4	NA
GTGAAA	GCCAAT	14651	19	B	7	136	Norm.bc	1pM	H4	NA
GTGAGA	ACAGTG	179934	87	H	3	168	Norm.bc	10pM	H4	NA
GTGAGA	ATCACG	121	87	H	3	168	eAg	NA	H4	NA
GTGAGA	CAGATC	3329	87	H	3	168	Norm.bc	0.5pM	H4	NA
GTGAGA	CGATGT	332	87	H	3	168	sAg	NA	H4	NA
GTGAGA	GCCAAT	17656	87	H	3	168	Norm.bc	1pM	H4	NA
GTGGCC	ACAGTG	123895	20	B	8	137	Norm.bc	10pM	H4	NA
GTGGCC	ATCACG	289	20	B	8	137	eAg	NA	H4	NA
GTGGCC	CAGATC	2420	20	B	8	137	Norm.bc	0.5pM	H4	NA
GTGGCC	CGATGT	922	20	B	8	137	sAg	NA	H4	NA
GTGGCC	GCCAAT	12153	20	B	8	137	Norm.bc	1pM	H4	NA
GTGTAT	ACAGTG	183941	90	H	6	171	Norm.bc	10pM	H4	NA
GTGTAT	ATCACG	129	90	H	6	171	eAg	NA	H4	NA
GTGTAT	CAGATC	3556	90	H	6	171	Norm.bc	0.5pM	H4	NA
GTGTAT	CGATGT	455	90	H	6	171	sAg	NA	H4	NA
GTGTAT	GCCAAT	18208	90	H	6	171	Norm.bc	1pM	H4	NA
GTTTCG	ACAGTG	153883	21	B	9	138	Norm.bc	10pM	H4	NA
GTTTCG	ATCACG	137	21	B	9	138	eAg	NA	H4	NA
GTTTCG	CAGATC	2939	21	B	9	138	Norm.bc	0.5pM	H4	NA
GTTTCG	CGATGT	296	21	B	9	138	sAg	NA	H4	NA
GTTTCG	GCCAAT	15297	21	B	9	138	Norm.bc	1pM	H4	NA
TAACCG	ACAGTG	174967	77	G	5	170	Norm.bc	10pM	H4	NA
TAACCG	ATCACG	740	77	G	5	170	eAg	NA	H4	NA
TAACCG	CAGATC	3405	77	G	5	170	Norm.bc	0.5pM	H4	NA
TAACCG	CGATGT	559	77	G	5	170	sAg	NA	H4	NA
TAACCG	GCCAAT	17282	77	G	5	170	Norm.bc	1pM	H4	NA
TAAGAC	ACAGTG	234528	88	H	4	169	Norm.bc	10pM	H4	NA
TAAGAC	ATCACG	236	88	H	4	169	eAg	NA	H4	NA
TAAGAC	CAGATC	4403	88	H	4	169	Norm.bc	0.5pM	H4	NA
TAAGAC	CGATGT	443	88	H	4	169	sAg	NA	H4	NA
TAAGAC	GCCAAT	23157	88	H	4	169	Norm.bc	1pM	H4	NA
TAATCG	ACAGTG	155832	42	D	6	147	Norm.bc	10pM	H4	NA
TAATCG	ATCACG	95	42	D	6	147	eAg	NA	H4	NA
TAATCG	CAGATC	2894	42	D	6	147	Norm.bc	0.5pM	H4	NA
TAATCG	CGATGT	231	42	D	6	147	sAg	NA	H4	NA
TAATCG	GCCAAT	15208	42	D	6	147	Norm.bc	1pM	H4	NA
TACAGC	ACAGTG	125323	43	D	7	148	Norm.bc	10pM	H4	NA
TACAGC	ATCACG	127	43	D	7	148	eAg	NA	H4	NA
TACAGC	CAGATC	2370	43	D	7	148	Norm.bc	0.5pM	H4	NA
TACAGC	CGATGT	293	43	D	7	148	sAg	NA	H4	NA
TACAGC	GCCAAT	12339	43	D	7	148	Norm.bc	1pM	H4	NA
TACCTT	ACAGTG	170623	65	F	5	158	Norm.bc	10pM	H4	NA
TACCTT	ATCACG	405	65	F	5	158	eAg	NA	H4	NA
TACCTT	CAGATC	3230	65	F	5	158	Norm.bc	0.5pM	H4	NA
TACCTT	CGATGT	576	65	F	5	158	sAg	NA	H4	NA
TACCTT	GCCAAT	16809	65	F	5	158	Norm.bc	1pM	H4	NA
TAGCTT	ACAGTG	221033	10	A	10	139	Norm.bc	10pM	H4	NA
TAGCTT	ATCACG	808	10	A	10	139	eAg	NA	H4	NA
TAGCTT	CAGATC	4282	10	A	10	139	Norm.bc	0.5pM	H4	NA
TAGCTT	CGATGT	837	10	A	10	139	sAg	NA	H4	NA
TAGCTT	GCCAAT	21825	10	A	10	139	Norm.bc	1pM	H4	NA
TATAAT	ACAGTG	161967	44	D	8	149	Norm.bc	10pM	H4	NA
TATAAT	ATCACG	106	44	D	8	149	eAg	NA	H4	NA
TATAAT	CAGATC	3145	44	D	8	149	Norm.bc	0.5pM	H4	NA
TATAAT	CGATGT	260	44	D	8	149	sAg	NA	H4	NA
TATAAT	GCCAAT	15666	44	D	8	149	Norm.bc	1pM	H4	NA
TATATC	ACAGTG	145555	53	E	5	158	Norm.bc	10pM	H4	NA
TATATC	ATCACG	340	53	E	5	158	eAg	NA	H4	NA
TATATC	CAGATC	2783	53	E	5	158	Norm.bc	0.5pM	H4	NA
TATATC	CGATGT	509	53	E	5	158	sAg	NA	H4	NA
TATATC	GCCAAT	14333	53	E	5	158	Norm.bc	1pM	H4	NA
TATGCA	ACAGTG	197109	75	G	3	168	Norm.bc	10pM	H4	NA
TATGCA	ATCACG	127	75	G	3	168	eAg	NA	H4	NA
TATGCA	CAGATC	3758	75	G	3	168	Norm.bc	0.5pM	H4	NA
TATGCA	CGATGT	375	75	G	3	168	sAg	NA	H4	NA
TATGCA	GCCAAT	19324	75	G	3	168	Norm.bc	1pM	H4	NA
TATTAT	ACAGTG	171071	54	E	6	159	Norm.bc	10pM	H4	NA
TATTAT	ATCACG	98	54	E	6	159	eAg	NA	H4	NA
TATTAT	CAGATC	3340	54	E	6	159	Norm.bc	0.5pM	H4	NA
TATTAT	CGATGT	293	54	E	6	159	sAg	NA	H4	NA
TATTAT	GCCAAT	16769	54	E	6	159	Norm.bc	1pM	H4	NA
TCATTC	ACAGTG	121733	45	D	9	150	Norm.bc	10pM	H4	NA
TCATTC	ATCACG	264	45	D	9	150	eAg	NA	H4	NA
TCATTC	CAGATC	2331	45	D	9	150	Norm.bc	0.5pM	H4	NA
TCATTC	CGATGT	301	45	D	9	150	sAg	NA	H4	NA
TCATTC	GCCAAT	11860	45	D	9	150	Norm.bc	1pM	H4	NA
TCCACA	ACAGTG	146962	56	E	8	161	Norm.bc	10pM	H4	NA
TCCACA	ATCACG	99	56	E	8	161	eAg	NA	H4	NA
TCCACA	CAGATC	2900	56	E	8	161	Norm.bc	0.5pM	H4	NA
TCCACA	CGATGT	232	56	E	8	161	sAg	NA	H4	NA
TCCACA	GCCAAT	14355	56	E	8	161	Norm.bc	1pM	H4	NA
TCCCGA	ACAGTG	179701	46	D	10	151	Norm.bc	10pM	H4	NA
TCCCGA	ATCACG	219	46	D	10	151	eAg	NA	H4	NA
TCCCGA	CAGATC	3501	46	D	10	151	Norm.bc	0.5pM	H4	NA
TCCCGA	CGATGT	429	46	D	10	151	sAg	NA	H4	NA
TCCCGA	GCCAAT	17570	46	D	10	151	Norm.bc	1pM	H4	NA
TCCTGC	ACAGTG	171930	58	E	10	163	Norm.bc	10pM	H4	NA
TCCTGC	ATCACG	163	58	E	10	163	eAg	NA	H4	NA
TCCTGC	CAGATC	3345	58	E	10	163	Norm.bc	0.5pM	H4	NA
TCCTGC	CGATGT	376	58	E	10	163	sAg	NA	H4	NA
TCCTGC	GCCAAT	16817	58	E	10	163	Norm.bc	1pM	H4	NA
TCGAAG	ACAGTG	179289	47	D	11	152	Norm.bc	10pM	H4	NA
TCGAAG	ATCACG	209	47	D	11	152	eAg	NA	H4	NA
TCGAAG	CAGATC	3455	47	D	11	152	Norm.bc	0.5pM	H4	NA
TCGAAG	CGATGT	467	47	D	11	152	sAg	NA	H4	NA
TCGAAG	GCCAAT	17868	47	D	11	152	Norm.bc	1pM	H4	NA
TCGGCA	ACAGTG	239541	48	D	12	153	Norm.bc	10pM	H4	NA
TCGGCA	ATCACG	199	48	D	12	153	eAg	NA	H4	NA
TCGGCA	CAGATC	4609	48	D	12	153	Norm.bc	0.5pM	H4	NA
TCGGCA	CGATGT	714	48	D	12	153	sAg	NA	H4	NA
TCGGCA	GCCAAT	23976	48	D	12	153	Norm.bc	1pM	H4	NA
TGACCA	ACAGTG	219649	4	A	4	133	Norm.bc	10pM	H4	NA
TGACCA	ATCACG	69	4	A	4	133	eAg	NA	H4	NA
TGACCA	CAGATC	4190	4	A	4	133	Norm.bc	0.5pM	H4	NA
TGACCA	CGATGT	223	4	A	4	133	sAg	NA	H4	NA
TGACCA	GCCAAT	22094	4	A	4	133	Norm.bc	1pM	H4	NA
TGCGCT	ACAGTG	176102	60	E	12	165	Norm.bc	10pM	H4	NA
TGCGCT	ATCACG	137	60	E	12	165	eAg	NA	H4	NA
TGCGCT	CAGATC	3377	60	E	12	165	Norm.bc	0.5pM	H4	NA
TGCGCT	CGATGT	660	60	E	12	165	sAg	NA	H4	NA
TGCGCT	GCCAAT	17475	60	E	12	165	Norm.bc	1pM	H4	NA
TGGAGC	ACAGTG	172205	79	G	7	172	Norm.bc	10pM	H4	NA
TGGAGC	ATCACG	190	79	G	7	172	eAg	NA	H4	NA
TGGAGC	CAGATC	3389	79	G	7	172	Norm.bc	0.5pM	H4	NA
TGGAGC	CGATGT	430	79	G	7	172	sAg	NA	H4	NA
TGGAGC	GCCAAT	17074	79	G	7	172	Norm.bc	1pM	H4	NA
TTAGGC	ACAGTG	227350	3	A	3	132	Norm.bc	10pM	H4	NA
TTAGGC	ATCACG	282	3	A	3	132	eAg	NA	H4	NA
TTAGGC	CAGATC	4353	3	A	3	132	Norm.bc	0.5pM	H4	NA
TTAGGC	CGATGT	1507	3	A	3	132	sAg	NA	H4	NA
TTAGGC	GCCAAT	22546	3	A	3	132	Norm.bc	1pM	H4	NA
TTCTCG	ACAGTG	186533	57	E	9	162	Norm.bc	10pM	H4	NA
TTCTCG	ATCACG	612	57	E	9	162	eAg	NA	H4	NA
TTCTCG	CAGATC	3689	57	E	9	162	Norm.bc	0.5pM	H4	NA
TTCTCG	CGATGT	1310	57	E	9	162	sAg	NA	H4	NA
TTCTCG	GCCAAT	18594	57	E	9	162	Norm.bc	1pM	H4	NA
TTGCGG	ACAGTG	153644	63	F	3	156	Norm.bc	10pM	H4	NA
TTGCGG	ATCACG	206	63	F	3	156	eAg	NA	H4	NA
TTGCGG	CAGATC	2853	63	F	3	156	Norm.bc	0.5pM	H4	NA
TTGCGG	CGATGT	19940	63	F	3	156	sAg	NA	H4	NA
TTGCGG	GCCAAT	14981	63	F	3	156	Norm.bc	1pM	H4	NA
AACGGA	ACAGTG	185918	61	F	1	197	Norm.bc	10pM	H5	NA
AACGGA	ATCACG	2302	61	F	1	197	eAg	NA	H5	NA
AACGGA	CAGATC	3528	61	F	1	197	Norm.bc	0.5pM	H5	NA
AACGGA	CGATGT	3351	61	F	1	197	sAg	NA	H5	NA
AACGGA	GCCAAT	18551	61	F	1	197	Norm.bc	1pM	H5	NA
AAGGAG	ACAGTG	117101	51	E	3	199	Norm.bc	10pM	H5	NA
AAGGAG	ATCACG	163	51	E	3	199	eAg	NA	H5	NA
AAGGAG	CAGATC	2140	51	E	3	199	Norm.bc	0.5pM	H5	NA
AAGGAG	CGATGT	22523	51	E	3	199	sAg	NA	H5	NA
AAGGAG	GCCAAT	11401	51	E	3	199	Norm.bc	1pM	H5	NA
AATCGT	ACAGTG	158256	68	F	8	204	Norm.bc	10pM	H5	NA
AATCGT	ATCACG	95	68	F	8	204	eAg	NA	H5	NA
AATCGT	CAGATC	3100	68	F	8	204	Norm.bc	0.5pM	H5	NA
AATCGT	CGATGT	246	68	F	8	204	sAg	NA	H5	NA
AATCGT	GCCAAT	15759	68	F	8	204	Norm.bc	1pM	H5	NA
AATTCC	ACAGTG	134077	71	F	11	207	Norm.bc	10pM	H5	NA
AATTCC	ATCACG	93	71	F	11	207	eAg	NA	H5	NA
AATTCC	CAGATC	2647	71	F	11	207	Norm.bc	0.5pM	H5	NA
AATTCC	CGATGT	254	71	F	11	207	sAg	NA	H5	NA
AATTCC	GCCAAT	13133	71	F	11	207	Norm.bc	1pM	H5	NA
ACAGTG	ACAGTG	259584	5	A	5	177	Norm.bc	10pM	H5	NA
ACAGTG	ATCACG	514	5	A	5	177	eAg	NA	H5	NA
ACAGTG	CAGATC	4884	5	A	5	177	Norm.bc	0.5pM	H5	NA
ACAGTG	CGATGT	426	5	A	5	177	sAg	NA	H5	NA
ACAGTG	GCCAAT	25528	5	A	5	177	Norm.bc	1pM	H5	NA
ACGAGG	ACAGTG	139283	67	F	7	203	Norm.bc	10pM	H5	NA
ACGAGG	ATCACG	367	67	F	7	203	eAg	NA	H5	NA
ACGAGG	CAGATC	2653	67	F	7	203	Norm.bc	0.5pM	H5	NA
ACGAGG	CGATGT	326	67	F	7	203	sAg	NA	H5	NA
ACGAGG	GCCAAT	13572	67	F	7	203	Norm.bc	1pM	H5	NA
ACTGAT	ACAGTG	201735	25	C	1	185	Norm.bc	10pM	H5	NA
ACTGAT	ATCACG	188	25	C	1	185	eAg	NA	H5	NA
ACTGAT	CAGATC	4029	25	C	1	185	Norm.bc	0.5pM	H5	NA
ACTGAT	CGATGT	741	25	C	1	185	sAg	NA	H5	NA
ACTGAT	GCCAAT	19787	25	C	1	185	Norm.bc	1pM	H5	NA
ACTTGA	ACAGTG	235116	8	A	8	180	Norm.bc	10pM	H5	NA
ACTTGA	ATCACG	148	8	A	8	180	eAg	NA	H5	NA
ACTTGA	CAGATC	4479	8	A	8	180	Norm.bc	0.5pM	H5	NA
ACTTGA	CGATGT	386	8	A	8	180	sAg	NA	H5	NA
ACTTGA	GCCAAT	23386	8	A	8	180	Norm.bc	1pM	H5	NA
AGACCA	ACAGTG	89868	70	F	10	206	Norm.bc	10pM	H5	NA
AGACCA	ATCACG	124	70	F	10	206	eAg	NA	H5	NA
AGACCA	CAGATC	1799	70	F	10	206	Norm.bc	0.5pM	H5	NA
AGACCA	CGATGT	383	70	F	10	206	sAg	NA	H5	NA
AGACCA	GCCAAT	8913	70	F	10	206	Norm.bc	1pM	H5	NA
AGATGT	ACAGTG	233268	72	F	12	208	Norm.bc	10pM	H5	NA
AGATGT	ATCACG	295	72	F	12	208	eAg	NA	H5	NA
AGATGT	CAGATC	4468	72	F	12	208	Norm.bc	0.5pM	H5	NA
AGATGT	CGATGT	600	72	F	12	208	sAg	NA	H5	NA
AGATGT	GCCAAT	23206	72	F	12	208	Norm.bc	1pM	H5	NA
AGCACC	ACAGTG	114588	55	E	7	203	Norm.bc	10pM	H5	NA
AGCACC	ATCACG	297	55	E	7	203	eAg	NA	H5	NA
AGCACC	CAGATC	2156	55	E	7	203	Norm.bc	0.5pM	H5	NA
AGCACC	CGATGT	274	55	E	7	203	sAg	NA	H5	NA
AGCACC	GCCAAT	11129	55	E	7	203	Norm.bc	1pM	H5	NA
AGTCAA	ACAGTG	200211	13	B	1	173	Norm.bc	10pM	H5	NA
AGTCAA	ATCACG	144	13	B	1	173	eAg	NA	H5	NA
AGTCAA	CAGATC	3828	13	B	1	173	Norm.bc	0.5pM	H5	NA
AGTCAA	CGATGT	370	13	B	1	173	sAg	NA	H5	NA
AGTCAA	GCCAAT	19599	13	B	1	173	Norm.bc	1pM	H5	NA
AGTCTC	ACAGTG	100519	78	G	6	214	Norm.bc	10pM	H5	NA
AGTCTC	ATCACG	113	78	G	6	214	eAg	NA	H5	NA
AGTCTC	CAGATC	1915	78	G	6	214	Norm.bc	0.5pM	H5	NA
AGTCTC	CGATGT	339	78	G	6	214	sAg	NA	H5	NA
AGTCTC	GCCAAT	9744	78	G	6	214	Norm.bc	1pM	H5	NA
AGTTCC	ACAGTG	120183	14	B	2	174	Norm.bc	10pM	H5	NA
AGTTCC	ATCACG	93	14	B	2	174	eAg	NA	H5	NA
AGTTCC	CAGATC	2174	14	B	2	174	Norm.bc	0.5pM	H5	NA
AGTTCC	CGATGT	312	14	B	2	174	sAg	NA	H5	NA
AGTTCC	GCCAAT	11972	14	B	2	174	Norm.bc	1pM	H5	NA
ATAGAT	ACAGTG	107530	74	G	2	210	Norm.bc	10pM	H5	NA
ATAGAT	ATCACG	183	74	G	2	210	eAg	NA	H5	NA
ATAGAT	CAGATC	2165	74	G	2	210	Norm.bc	0.5pM	H5	NA
ATAGAT	CGATGT	218	74	G	2	210	sAg	NA	H5	NA
ATAGAT	GCCAAT	10445	74	G	2	210	Norm.bc	1pM	H5	NA
ATCACG	ACAGTG	273807	1	A	1	173	Norm.bc	10pM	H5	NA
ATCACG	ATCACG	208	1	A	1	173	eAg	NA	H5	NA
ATCACG	CAGATC	5250	1	A	1	173	Norm.bc	0.5pM	H5	NA
[truncated: 3,375 more rows]

## Sheet: HBV_Cohort 2
Related to Figure 6, and Figure 6–Figure Supplement 1 and 2
Well_BC	Ab_BC	Count	well_id	row_id	col_id	sample	epitope	plate
AACGGA	ATCACG	2796	61	E	8	29	HBeAg	P1
AACGGA	CGATGT	15331	61	E	8	29	HBsAg	P1
AACGGA	GCCAAT	10882	61	E	8	29	Norm_bc	P1
AAGGAG	ATCACG	10008	51	C	7	27	HBeAg	P1
AAGGAG	CGATGT	53319	51	C	7	27	HBsAg	P1
AAGGAG	GCCAAT	21812	51	C	7	27	Norm_bc	P1
AATCGT	ATCACG	2007	68	D	9	36	HBeAg	P1
AATCGT	CGATGT	11142	68	D	9	36	HBsAg	P1
AATCGT	GCCAAT	6281	68	D	9	36	Norm_bc	P1
AATTCC	ATCACG	7377	71	G	9	39	HBeAg	P1
AATTCC	CGATGT	39553	71	G	9	39	HBsAg	P1
AATTCC	GCCAAT	22773	71	G	9	39	Norm_bc	P1
ACAGTG	ATCACG	2498	5	E	1	5	HBeAg	P1
ACAGTG	CGATGT	14270	5	E	1	5	HBsAg	P1
ACAGTG	GCCAAT	8066	5	E	1	5	Norm_bc	P1
ACCTTA	ATCACG	713	95	G	12	Negative	HBeAg	P1
ACCTTA	CGATGT	3876	95	G	12	Negative	HBsAg	P1
ACCTTA	GCCAAT	4224	95	G	12	Negative	Norm_bc	P1
ACGAGG	ATCACG	2480	67	C	9	35	HBeAg	P1
ACGAGG	CGATGT	33959	67	C	9	35	HBsAg	P1
ACGAGG	GCCAAT	7865	67	C	9	35	Norm_bc	P1
ACTGAT	ATCACG	11118	25	A	4	9	HBeAg	P1
ACTGAT	CGATGT	62205	25	A	4	9	HBsAg	P1
ACTGAT	GCCAAT	25822	25	A	4	9	Norm_bc	P1
ACTGCT	ATCACG	1318	84	D	11	44	HBeAg	P1
ACTGCT	CGATGT	7149	84	D	11	44	HBsAg	P1
ACTGCT	GCCAAT	6971	84	D	11	44	Norm_bc	P1
ACTTGA	ATCACG	10488	8	H	1	8	HBeAg	P1
ACTTGA	CGATGT	58859	8	H	1	8	HBsAg	P1
ACTTGA	GCCAAT	20858	8	H	1	8	Norm_bc	P1
AGACCA	ATCACG	5584	70	F	9	38	HBeAg	P1
AGACCA	CGATGT	30174	70	F	9	38	HBsAg	P1
AGACCA	GCCAAT	21140	70	F	9	38	Norm_bc	P1
AGAGTA	ATCACG	1362	92	D	12	44	HBeAg	P1
AGAGTA	CGATGT	7848	92	D	12	44	HBsAg	P1
AGAGTA	GCCAAT	7415	92	D	12	44	Norm_bc	P1
AGATGT	ATCACG	3785	72	H	9	40	HBeAg	P1
AGATGT	CGATGT	20491	72	H	9	40	HBsAg	P1
AGATGT	GCCAAT	13748	72	H	9	40	Norm_bc	P1
AGCACC	ATCACG	8067	55	G	7	31	HBeAg	P1
AGCACC	CGATGT	43529	55	G	7	31	HBsAg	P1
AGCACC	GCCAAT	21258	55	G	7	31	Norm_bc	P1
AGTCAA	ATCACG	1091	13	E	2	5	HBeAg	P1
AGTCAA	CGATGT	6322	13	E	2	5	HBsAg	P1
AGTCAA	GCCAAT	3095	13	E	2	5	Norm_bc	P1
AGTCCA	ATCACG	658	93	E	12	45	HBeAg	P1
AGTCCA	CGATGT	3615	93	E	12	45	HBsAg	P1
AGTCCA	GCCAAT	4623	93	E	12	45	Norm_bc	P1
AGTCTC	ATCACG	1601	78	F	10	38	HBeAg	P1
AGTCTC	CGATGT	8919	78	F	10	38	HBsAg	P1
AGTCTC	GCCAAT	7117	78	F	10	38	Norm_bc	P1
AGTTCC	ATCACG	2465	14	F	2	6	HBeAg	P1
AGTTCC	CGATGT	12740	14	F	2	6	HBsAg	P1
AGTTCC	GCCAAT	10273	14	F	2	6	Norm_bc	P1
ATAGAT	ATCACG	2746	74	B	10	34	HBeAg	P1
ATAGAT	CGATGT	15158	74	B	10	34	HBsAg	P1
ATAGAT	GCCAAT	9267	74	B	10	34	Norm_bc	P1
ATCACG	ATCACG	16015	1	A	1	1	HBeAg	P1
ATCACG	CGATGT	95017	1	A	1	1	HBsAg	P1
ATCACG	GCCAAT	23066	1	A	1	1	Norm_bc	P1
ATGAGC	ATCACG	10469	26	B	4	10	HBeAg	P1
ATGAGC	CGATGT	58531	26	B	4	10	HBsAg	P1
ATGAGC	GCCAAT	26065	26	B	4	10	Norm_bc	P1
ATGGCA	ATCACG	9076	50	B	7	26	HBeAg	P1
ATGGCA	CGATGT	48858	50	B	7	26	HBsAg	P1
ATGGCA	GCCAAT	19185	50	B	7	26	Norm_bc	P1
ATGTCA	ATCACG	4268	15	G	2	7	HBeAg	P1
ATGTCA	CGATGT	22976	15	G	2	7	HBsAg	P1
ATGTCA	GCCAAT	14006	15	G	2	7	Norm_bc	P1
ATTCCT	ATCACG	1617	27	C	4	11	HBeAg	P1
ATTCCT	CGATGT	9260	27	C	4	11	HBsAg	P1
ATTCCT	GCCAAT	8550	27	C	4	11	Norm_bc	P1
CAAAAG	ATCACG	7316	28	D	4	12	HBeAg	P1
CAAAAG	CGATGT	39626	28	D	4	12	HBsAg	P1
CAAAAG	GCCAAT	19959	28	D	4	12	Norm_bc	P1
CAACTA	ATCACG	8229	29	E	4	13	HBeAg	P1
CAACTA	CGATGT	45404	29	E	4	13	HBsAg	P1
CAACTA	GCCAAT	22582	29	E	4	13	Norm_bc	P1
CAAGTT	ATCACG	7557	64	H	8	32	HBeAg	P1
CAAGTT	CGATGT	104586	64	H	8	32	HBsAg	P1
CAAGTT	GCCAAT	19735	64	H	8	32	Norm_bc	P1
CACCGG	ATCACG	1203	30	F	4	14	HBeAg	P1
CACCGG	CGATGT	6931	30	F	4	14	HBsAg	P1
CACCGG	GCCAAT	3392	30	F	4	14	Norm_bc	P1
CACGAT	ATCACG	7044	31	G	4	15	HBeAg	P1
CACGAT	CGATGT	38608	31	G	4	15	HBsAg	P1
CACGAT	GCCAAT	18484	31	G	4	15	Norm_bc	P1
CACTCA	ATCACG	9456	32	H	4	16	HBeAg	P1
CACTCA	CGATGT	51615	32	H	4	16	HBsAg	P1
CACTCA	GCCAAT	22140	32	H	4	16	Norm_bc	P1
CAGATC	ATCACG	11002	7	G	1	7	HBeAg	P1
CAGATC	CGATGT	60646	7	G	1	7	HBsAg	P1
CAGATC	GCCAAT	22680	7	G	1	7	Norm_bc	P1
CAGGCC	ATCACG	2243	81	A	11	41	HBeAg	P1
CAGGCC	CGATGT	12305	81	A	11	41	HBsAg	P1
CAGGCC	GCCAAT	7937	81	A	11	41	Norm_bc	P1
CAGGCG	ATCACG	977	33	A	5	17	HBeAg	P1
CAGGCG	CGATGT	5634	33	A	5	17	HBsAg	P1
CAGGCG	GCCAAT	2985	33	A	5	17	Norm_bc	P1
CAGTAA	ATCACG	1532	82	B	11	42	HBeAg	P1
CAGTAA	CGATGT	8544	82	B	11	42	HBsAg	P1
CAGTAA	GCCAAT	7048	82	B	11	42	Norm_bc	P1
CATGGC	ATCACG	2000	34	B	5	18	HBeAg	P1
CATGGC	CGATGT	10837	34	B	5	18	HBsAg	P1
CATGGC	GCCAAT	8401	34	B	5	18	Norm_bc	P1
CATTTT	ATCACG	1057	35	C	5	19	HBeAg	P1
CATTTT	CGATGT	5782	35	C	5	19	HBsAg	P1
CATTTT	GCCAAT	2789	35	C	5	19	Norm_bc	P1
CCAACA	ATCACG	3675	36	D	5	20	HBeAg	P1
CCAACA	CGATGT	19191	36	D	5	20	HBsAg	P1
CCAACA	GCCAAT	14043	36	D	5	20	Norm_bc	P1
CCGTCC	ATCACG	9890	16	H	2	8	HBeAg	P1
CCGTCC	CGATGT	53867	16	H	2	8	HBsAg	P1
CCGTCC	GCCAAT	21197	16	H	2	8	Norm_bc	P1
CCTATT	ATCACG	802	76	D	10	36	HBeAg	P1
CCTATT	CGATGT	4371	76	D	10	36	HBsAg	P1
CCTATT	GCCAAT	3536	76	D	10	36	Norm_bc	P1
CGATGT	ATCACG	2187	2	B	1	2	HBeAg	P1
CGATGT	CGATGT	12405	2	B	1	2	HBsAg	P1
CGATGT	GCCAAT	5364	2	B	1	2	Norm_bc	P1
CGCCAA	ATCACG	1353	96	H	12	Blank	HBeAg	P1
CGCCAA	CGATGT	6999	96	H	12	Blank	HBsAg	P1
CGCCAA	GCCAAT	7761	96	H	12	Blank	Norm_bc	P1
CGCGGC	ATCACG	8482	59	C	8	27	HBeAg	P1
CGCGGC	CGATGT	44257	59	C	8	27	HBsAg	P1
CGCGGC	GCCAAT	18351	59	C	8	27	Norm_bc	P1
CGGAAT	ATCACG	10853	37	E	5	21	HBeAg	P1
CGGAAT	CGATGT	57944	37	E	5	21	HBsAg	P1
CGGAAT	GCCAAT	29615	37	E	5	21	Norm_bc	P1
CGTACG	ATCACG	937	22	F	3	14	HBeAg	P1
CGTACG	CGATGT	5284	22	F	3	14	HBsAg	P1
CGTACG	GCCAAT	2705	22	F	3	14	Norm_bc	P1
CGTTAG	ATCACG	1716	89	A	12	41	HBeAg	P1
CGTTAG	CGATGT	9632	89	A	12	41	HBsAg	P1
CGTTAG	GCCAAT	6985	89	A	12	41	Norm_bc	P1
CTAAGG	ATCACG	1123	85	E	11	45	HBeAg	P1
CTAAGG	CGATGT	7040	85	E	11	45	HBsAg	P1
CTAAGG	GCCAAT	5274	85	E	11	45	Norm_bc	P1
CTAGCT	ATCACG	9043	38	F	5	22	HBeAg	P1
CTAGCT	CGATGT	48499	38	F	5	22	HBsAg	P1
CTAGCT	GCCAAT	23657	38	F	5	22	Norm_bc	P1
CTATAC	ATCACG	7479	39	G	5	23	HBeAg	P1
CTATAC	CGATGT	41603	39	G	5	23	HBsAg	P1
CTATAC	GCCAAT	18715	39	G	5	23	Norm_bc	P1
CTATCT	ATCACG	849	52	D	7	28	HBeAg	P1
CTATCT	CGATGT	4491	52	D	7	28	HBsAg	P1
CTATCT	GCCAAT	3080	52	D	7	28	Norm_bc	P1
CTCAGA	ATCACG	8010	40	H	5	24	HBeAg	P1
CTCAGA	CGATGT	43602	40	H	5	24	HBsAg	P1
CTCAGA	GCCAAT	19706	40	H	5	24	Norm_bc	P1
CTGCAT	ATCACG	2896	80	H	10	40	HBeAg	P1
CTGCAT	CGATGT	15820	80	H	10	40	HBsAg	P1
CTGCAT	GCCAAT	10056	80	H	10	40	Norm_bc	P1
CTTGTA	ATCACG	2259	12	D	2	4	HBeAg	P1
CTTGTA	CGATGT	327147	12	D	2	4	HBsAg	P1
CTTGTA	GCCAAT	4927	12	D	2	4	Norm_bc	P1
GAATGC	ATCACG	1077	91	C	12	43	HBeAg	P1
GAATGC	CGATGT	5833	91	C	12	43	HBsAg	P1
GAATGC	GCCAAT	5997	91	C	12	43	Norm_bc	P1
GACGAC	ATCACG	2711	41	A	6	17	HBeAg	P1
GACGAC	CGATGT	14989	41	A	6	17	HBsAg	P1
GACGAC	GCCAAT	10136	41	A	6	17	Norm_bc	P1
GACGAT	ATCACG	6259	62	F	8	30	HBeAg	P1
GACGAT	CGATGT	33949	62	F	8	30	HBsAg	P1
GACGAT	GCCAAT	21181	62	F	8	30	Norm_bc	P1
GAGCGC	ATCACG	2353	66	B	9	34	HBeAg	P1
GAGCGC	CGATGT	13037	66	B	9	34	HBsAg	P1
GAGCGC	GCCAAT	7071	66	B	9	34	Norm_bc	P1
GAGTCT	ATCACG	4315	69	E	9	37	HBeAg	P1
GAGTCT	CGATGT	23179	69	E	9	37	HBsAg	P1
GAGTCT	GCCAAT	18218	69	E	9	37	Norm_bc	P1
GAGTGG	ATCACG	8957	23	G	3	15	HBeAg	P1
GAGTGG	CGATGT	49070	23	G	3	15	HBsAg	P1
GAGTGG	GCCAAT	23788	23	G	3	15	Norm_bc	P1
GATCAG	ATCACG	1492	9	A	2	1	HBeAg	P1
GATCAG	CGATGT	8623	9	A	2	1	HBsAg	P1
GATCAG	GCCAAT	3744	9	A	2	1	Norm_bc	P1
GCCAAT	ATCACG	7011	6	F	1	6	HBeAg	P1
GCCAAT	CGATGT	37606	6	F	1	6	HBsAg	P1
GCCAAT	GCCAAT	19168	6	F	1	6	Norm_bc	P1
GGAGAA	ATCACG	3196	73	A	10	33	HBeAg	P1
GGAGAA	CGATGT	18093	73	A	10	33	HBsAg	P1
GGAGAA	GCCAAT	9824	73	A	10	33	Norm_bc	P1
GGCTAC	ATCACG	8244	11	C	2	3	HBeAg	P1
GGCTAC	CGATGT	45161	11	C	2	3	HBsAg	P1
GGCTAC	GCCAAT	21523	11	C	2	3	Norm_bc	P1
GGTAGC	ATCACG	11004	24	H	3	16	HBeAg	P1
GGTAGC	CGATGT	60600	24	H	3	16	HBsAg	P1
GGTAGC	GCCAAT	26201	24	H	3	16	Norm_bc	P1
GTACTT	ATCACG	4275	49	A	7	25	HBeAg	P1
GTACTT	CGATGT	23668	49	A	7	25	HBsAg	P1
GTACTT	GCCAAT	15459	49	A	7	25	Norm_bc	P1
GTAGAG	ATCACG	10684	17	A	3	9	HBeAg	P1
GTAGAG	CGATGT	59776	17	A	3	9	HBsAg	P1
GTAGAG	GCCAAT	24511	17	A	3	9	Norm_bc	P1
GTCCGC	ATCACG	6541	18	B	3	10	HBeAg	P1
GTCCGC	CGATGT	35781	18	B	3	10	HBsAg	P1
GTCCGC	GCCAAT	21052	18	B	3	10	Norm_bc	P1
GTGAAA	ATCACG	10235	19	C	3	11	HBeAg	P1
GTGAAA	CGATGT	55387	19	C	3	11	HBsAg	P1
GTGAAA	GCCAAT	25216	19	C	3	11	Norm_bc	P1
GTGAGA	ATCACG	1576	87	G	11	Negative	HBeAg	P1
GTGAGA	CGATGT	9193	87	G	11	Negative	HBsAg	P1
GTGAGA	GCCAAT	6962	87	G	11	Negative	Norm_bc	P1
GTGGCC	ATCACG	11283	20	D	3	12	HBeAg	P1
GTGGCC	CGATGT	62243	20	D	3	12	HBsAg	P1
GTGGCC	GCCAAT	30979	20	D	3	12	Norm_bc	P1
GTGTAT	ATCACG	1466	90	B	12	42	HBeAg	P1
GTGTAT	CGATGT	8423	90	B	12	42	HBsAg	P1
GTGTAT	GCCAAT	6896	90	B	12	42	Norm_bc	P1
GTTACC	ATCACG	1134	83	C	11	43	HBeAg	P1
GTTACC	CGATGT	5931	83	C	11	43	HBsAg	P1
GTTACC	GCCAAT	5581	83	C	11	43	Norm_bc	P1
GTTTCG	ATCACG	7861	21	E	3	13	HBeAg	P1
GTTTCG	CGATGT	43133	21	E	3	13	HBsAg	P1
GTTTCG	GCCAAT	21907	21	E	3	13	Norm_bc	P1
TAACCG	ATCACG	1964	77	E	10	37	HBeAg	P1
TAACCG	CGATGT	10520	77	E	10	37	HBsAg	P1
TAACCG	GCCAAT	11765	77	E	10	37	Norm_bc	P1
TAAGAC	ATCACG	2272	88	H	11	Blank	HBeAg	P1
TAAGAC	CGATGT	12099	88	H	11	Blank	HBsAg	P1
TAAGAC	GCCAAT	9055	88	H	11	Blank	Norm_bc	P1
TAATCG	ATCACG	11664	42	B	6	18	HBeAg	P1
TAATCG	CGATGT	63719	42	B	6	18	HBsAg	P1
TAATCG	GCCAAT	24657	42	B	6	18	Norm_bc	P1
TACAGC	ATCACG	7378	43	C	6	19	HBeAg	P1
TACAGC	CGATGT	40576	43	C	6	19	HBsAg	P1
TACAGC	GCCAAT	18767	43	C	6	19	Norm_bc	P1
TACCTT	ATCACG	3334	65	A	9	33	HBeAg	P1
TACCTT	CGATGT	18353	65	A	9	33	HBsAg	P1
TACCTT	GCCAAT	9814	65	A	9	33	Norm_bc	P1
TAGCTT	ATCACG	10816	10	B	2	2	HBeAg	P1
TAGCTT	CGATGT	60476	10	B	2	2	HBsAg	P1
TAGCTT	GCCAAT	24513	10	B	2	2	Norm_bc	P1
TATAAT	ATCACG	943	44	D	6	20	HBeAg	P1
TATAAT	CGATGT	5183	44	D	6	20	HBsAg	P1
TATAAT	GCCAAT	2085	44	D	6	20	Norm_bc	P1
TATATC	ATCACG	3863	53	E	7	29	HBeAg	P1
TATATC	CGATGT	20583	53	E	7	29	HBsAg	P1
TATATC	GCCAAT	16142	53	E	7	29	Norm_bc	P1
TATGCA	ATCACG	2005	75	C	10	35	HBeAg	P1
TATGCA	CGATGT	59186	75	C	10	35	HBsAg	P1
TATGCA	GCCAAT	7015	75	C	10	35	Norm_bc	P1
TATTAT	ATCACG	7534	54	F	7	30	HBeAg	P1
TATTAT	CGATGT	40732	54	F	7	30	HBsAg	P1
TATTAT	GCCAAT	20582	54	F	7	30	Norm_bc	P1
TCATTC	ATCACG	2189	45	E	6	21	HBeAg	P1
TCATTC	CGATGT	11301	45	E	6	21	HBsAg	P1
TCATTC	GCCAAT	11516	45	E	6	21	Norm_bc	P1
TCCACA	ATCACG	9551	56	H	7	32	HBeAg	P1
TCCACA	CGATGT	128680	56	H	7	32	HBsAg	P1
TCCACA	GCCAAT	24264	56	H	7	32	Norm_bc	P1
TCCCGA	ATCACG	10694	46	F	6	22	HBeAg	P1
TCCCGA	CGATGT	57649	46	F	6	22	HBsAg	P1
TCCCGA	GCCAAT	28749	46	F	6	22	Norm_bc	P1
TCCTGC	ATCACG	9196	58	B	8	26	HBeAg	P1
TCCTGC	CGATGT	50257	58	B	8	26	HBsAg	P1
TCCTGC	GCCAAT	20438	58	B	8	26	Norm_bc	P1
TCGAAG	ATCACG	8806	47	G	6	23	HBeAg	P1
TCGAAG	CGATGT	46778	47	G	6	23	HBsAg	P1
TCGAAG	GCCAAT	22418	47	G	6	23	Norm_bc	P1
TCGGCA	ATCACG	9735	48	H	6	24	HBeAg	P1
TCGGCA	CGATGT	52837	48	H	6	24	HBsAg	P1
TCGGCA	GCCAAT	24548	48	H	6	24	Norm_bc	P1
TGACCA	ATCACG	5070	4	D	1	4	HBeAg	P1
TGACCA	CGATGT	668058	4	D	1	4	HBsAg	P1
TGACCA	GCCAAT	14106	4	D	1	4	Norm_bc	P1
TGCGCT	ATCACG	1001	60	D	8	28	HBeAg	P1
TGCGCT	CGATGT	5770	60	D	8	28	HBsAg	P1
TGCGCT	GCCAAT	2559	60	D	8	28	Norm_bc	P1
TGGAGC	ATCACG	1493	79	G	10	39	HBeAg	P1
TGGAGC	CGATGT	8234	79	G	10	39	HBsAg	P1
TGGAGC	GCCAAT	4873	79	G	10	39	Norm_bc	P1
TTAGGC	ATCACG	2361	3	C	1	3	HBeAg	P1
TTAGGC	CGATGT	13521	3	C	1	3	HBsAg	P1
TTAGGC	GCCAAT	5755	3	C	1	3	Norm_bc	P1
TTCTCG	ATCACG	3502	57	A	8	25	HBeAg	P1
TTCTCG	CGATGT	19481	57	A	8	25	HBsAg	P1
TTCTCG	GCCAAT	11349	57	A	8	25	Norm_bc	P1
TTGCGG	ATCACG	8298	63	G	8	31	HBeAg	P1
TTGCGG	CGATGT	44690	63	G	8	31	HBsAg	P1
TTGCGG	GCCAAT	23071	63	G	8	31	Norm_bc	P1
AACGGA	ATCACG	2218	61	E	8	74	HBeAg	P2
AACGGA	CGATGT	10924	61	E	8	74	HBsAg	P2
AACGGA	GCCAAT	6300	61	E	8	74	Norm_bc	P2
AAGGAG	ATCACG	18488	51	C	7	72	HBeAg	P2
AAGGAG	CGATGT	92160	51	C	7	72	HBsAg	P2
AAGGAG	GCCAAT	41676	51	C	7	72	Norm_bc	P2
AATCGT	ATCACG	3250	68	D	9	81	HBeAg	P2
AATCGT	CGATGT	16000	68	D	9	81	HBsAg	P2
AATCGT	GCCAAT	13636	68	D	9	81	Norm_bc	P2
AATTCC	ATCACG	15910	71	G	9	84	HBeAg	P2
AATTCC	CGATGT	89981	71	G	9	84	HBsAg	P2
AATTCC	GCCAAT	50086	71	G	9	84	Norm_bc	P2
ACAGTG	ATCACG	22330	5	E	1	50	HBeAg	P2
ACAGTG	CGATGT	117352	5	E	1	50	HBsAg	P2
ACAGTG	GCCAAT	54093	5	E	1	50	Norm_bc	P2
ACCTTA	ATCACG	1389	95	G	12	Negative	HBeAg	P2
ACCTTA	CGATGT	6629	95	G	12	Negative	HBsAg	P2
ACCTTA	GCCAAT	6749	95	G	12	Negative	Norm_bc	P2
ACGAGG	ATCACG	9630	67	C	9	80	HBeAg	P2
ACGAGG	CGATGT	50088	67	C	9	80	HBsAg	P2
ACGAGG	GCCAAT	32563	67	C	9	80	Norm_bc	P2
ACTGAT	ATCACG	21693	25	A	4	54	HBeAg	P2
ACTGAT	CGATGT	117416	25	A	4	54	HBsAg	P2
ACTGAT	GCCAAT	58788	25	A	4	54	Norm_bc	P2
ACTGCT	ATCACG	1990	84	D	11	89	HBeAg	P2
ACTGCT	CGATGT	9647	84	D	11	89	HBsAg	P2
ACTGCT	GCCAAT	11385	84	D	11	89	Norm_bc	P2
ACTTGA	ATCACG	10054	8	H	1	53	HBeAg	P2
ACTTGA	CGATGT	53359	8	H	1	53	HBsAg	P2
ACTTGA	GCCAAT	41949	8	H	1	53	Norm_bc	P2
AGACCA	ATCACG	10176	70	F	9	83	HBeAg	P2
AGACCA	CGATGT	51547	70	F	9	83	HBsAg	P2
AGACCA	GCCAAT	42802	70	F	9	83	Norm_bc	P2
AGAGTA	ATCACG	4179	92	D	12	89	HBeAg	P2
AGAGTA	CGATGT	19773	92	D	12	89	HBsAg	P2
AGAGTA	GCCAAT	34664	92	D	12	89	Norm_bc	P2
AGATGT	ATCACG	20249	72	H	9	85	HBeAg	P2
AGATGT	CGATGT	106862	72	H	9	85	HBsAg	P2
AGATGT	GCCAAT	56123	72	H	9	85	Norm_bc	P2
AGCACC	ATCACG	10168	55	G	7	76	HBeAg	P2
AGCACC	CGATGT	52620	55	G	7	76	HBsAg	P2
AGCACC	GCCAAT	29966	55	G	7	76	Norm_bc	P2
AGTCAA	ATCACG	18443	13	E	2	50	HBeAg	P2
AGTCAA	CGATGT	95475	13	E	2	50	HBsAg	P2
AGTCAA	GCCAAT	48838	13	E	2	50	Norm_bc	P2
AGTCCA	ATCACG	3066	93	E	12	90	HBeAg	P2
AGTCCA	CGATGT	15834	93	E	12	90	HBsAg	P2
AGTCCA	GCCAAT	25242	93	E	12	90	Norm_bc	P2
AGTCTC	ATCACG	4909	78	F	10	83	HBeAg	P2
AGTCTC	CGATGT	24778	78	F	10	83	HBsAg	P2
AGTCTC	GCCAAT	30218	78	F	10	83	Norm_bc	P2
AGTTCC	ATCACG	2610	14	F	2	51	HBeAg	P2
AGTTCC	CGATGT	13912	14	F	2	51	HBsAg	P2
AGTTCC	GCCAAT	8831	14	F	2	51	Norm_bc	P2
ATAGAT	ATCACG	3936	74	B	10	79	HBeAg	P2
ATAGAT	CGATGT	20499	74	B	10	79	HBsAg	P2
ATAGAT	GCCAAT	17692	74	B	10	79	Norm_bc	P2
ATCACG	ATCACG	9781	1	A	1	46	HBeAg	P2
ATCACG	CGATGT	51836	1	A	1	46	HBsAg	P2
ATCACG	GCCAAT	36624	1	A	1	46	Norm_bc	P2
ATGAGC	ATCACG	19183	26	B	4	55	HBeAg	P2
ATGAGC	CGATGT	98906	26	B	4	55	HBsAg	P2
ATGAGC	GCCAAT	56972	26	B	4	55	Norm_bc	P2
ATGGCA	ATCACG	5074	50	B	7	71	HBeAg	P2
ATGGCA	CGATGT	25346	50	B	7	71	HBsAg	P2
ATGGCA	GCCAAT	17131	50	B	7	71	Norm_bc	P2
ATGTCA	ATCACG	5658	15	G	2	52	HBeAg	P2
ATGTCA	CGATGT	30100	15	G	2	52	HBsAg	P2
ATGTCA	GCCAAT	22023	15	G	2	52	Norm_bc	P2
ATTCCT	ATCACG	1664	27	C	4	56	HBeAg	P2
ATTCCT	CGATGT	8429	27	C	4	56	HBsAg	P2
ATTCCT	GCCAAT	5208	27	C	4	56	Norm_bc	P2
CAAAAG	ATCACG	2260	28	D	4	57	HBeAg	P2
CAAAAG	CGATGT	11472	28	D	4	57	HBsAg	P2
CAAAAG	GCCAAT	8491	28	D	4	57	Norm_bc	P2
CAACTA	ATCACG	2676	29	E	4	58	HBeAg	P2
CAACTA	CGATGT	13838	29	E	4	58	HBsAg	P2
CAACTA	GCCAAT	11752	29	E	4	58	Norm_bc	P2
CAAGTT	ATCACG	15184	64	H	8	77	HBeAg	P2
CAAGTT	CGATGT	81796	64	H	8	77	HBsAg	P2
CAAGTT	GCCAAT	39944	64	H	8	77	Norm_bc	P2
CACCGG	ATCACG	3046	30	F	4	59	HBeAg	P2
CACCGG	CGATGT	15368	30	F	4	59	HBsAg	P2
CACCGG	GCCAAT	10644	30	F	4	59	Norm_bc	P2
CACGAT	ATCACG	14458	31	G	4	60	HBeAg	P2
CACGAT	CGATGT	74681	31	G	4	60	HBsAg	P2
CACGAT	GCCAAT	41587	31	G	4	60	Norm_bc	P2
CACTCA	ATCACG	8567	32	H	4	61	HBeAg	P2
CACTCA	CGATGT	44195	32	H	4	61	HBsAg	P2
CACTCA	GCCAAT	33579	32	H	4	61	Norm_bc	P2
CAGATC	ATCACG	6780	7	G	1	52	HBeAg	P2
CAGATC	CGATGT	35061	7	G	1	52	HBsAg	P2
CAGATC	GCCAAT	29920	7	G	1	52	Norm_bc	P2
CAGGCC	ATCACG	3918	81	A	11	86	HBeAg	P2
CAGGCC	CGATGT	19818	81	A	11	86	HBsAg	P2
CAGGCC	GCCAAT	20717	81	A	11	86	Norm_bc	P2
CAGGCG	ATCACG	7325	33	A	5	62	HBeAg	P2
CAGGCG	CGATGT	40497	33	A	5	62	HBsAg	P2
CAGGCG	GCCAAT	29677	33	A	5	62	Norm_bc	P2
CAGTAA	ATCACG	1977	82	B	11	87	HBeAg	P2
CAGTAA	CGATGT	10039	82	B	11	87	HBsAg	P2
CAGTAA	GCCAAT	11118	82	B	11	87	Norm_bc	P2
CATGGC	ATCACG	7497	34	B	5	63	HBeAg	P2
CATGGC	CGATGT	38163	34	B	5	63	HBsAg	P2
CATGGC	GCCAAT	28494	34	B	5	63	Norm_bc	P2
CATTTT	ATCACG	1553	35	C	5	64	HBeAg	P2
CATTTT	CGATGT	7465	35	C	5	64	HBsAg	P2
CATTTT	GCCAAT	4445	35	C	5	64	Norm_bc	P2
CCAACA	ATCACG	1163	36	D	5	65	HBeAg	P2
CCAACA	CGATGT	5848	36	D	5	65	HBsAg	P2
CCAACA	GCCAAT	3091	36	D	5	65	Norm_bc	P2
CCGTCC	ATCACG	12892	16	H	2	53	HBeAg	P2
CCGTCC	CGATGT	66481	16	H	2	53	HBsAg	P2
CCGTCC	GCCAAT	40189	16	H	2	53	Norm_bc	P2
CCTATT	ATCACG	1378	76	D	10	81	HBeAg	P2
CCTATT	CGATGT	7461	76	D	10	81	HBsAg	P2
CCTATT	GCCAAT	7809	76	D	10	81	Norm_bc	P2
CGATGT	ATCACG	12267	2	B	1	47	HBeAg	P2
CGATGT	CGATGT	62009	2	B	1	47	HBsAg	P2
CGATGT	GCCAAT	40355	2	B	1	47	Norm_bc	P2
CGCCAA	ATCACG	1428	96	H	12	Blank	HBeAg	P2
CGCCAA	CGATGT	6733	96	H	12	Blank	HBsAg	P2
CGCCAA	GCCAAT	6941	96	H	12	Blank	Norm_bc	P2
CGCGGC	ATCACG	16358	59	C	8	72	HBeAg	P2
CGCGGC	CGATGT	83990	59	C	8	72	HBsAg	P2
CGCGGC	GCCAAT	38343	59	C	8	72	Norm_bc	P2
CGGAAT	ATCACG	20033	37	E	5	66	HBeAg	P2
CGGAAT	CGATGT	101996	37	E	5	66	HBsAg	P2
CGGAAT	GCCAAT	55098	37	E	5	66	Norm_bc	P2
CGTACG	ATCACG	1566	22	F	3	59	HBeAg	P2
CGTACG	CGATGT	7935	22	F	3	59	HBsAg	P2
CGTACG	GCCAAT	4654	22	F	3	59	Norm_bc	P2
CGTTAG	ATCACG	2629	89	A	12	86	HBeAg	P2
CGTTAG	CGATGT	12962	89	A	12	86	HBsAg	P2
CGTTAG	GCCAAT	11876	89	A	12	86	Norm_bc	P2
CTAAGG	ATCACG	5299	85	E	11	90	HBeAg	P2
CTAAGG	CGATGT	24460	85	E	11	90	HBsAg	P2
CTAAGG	GCCAAT	30743	85	E	11	90	Norm_bc	P2
CTAGCT	ATCACG	9271	38	F	5	67	HBeAg	P2
CTAGCT	CGATGT	46972	38	F	5	67	HBsAg	P2
CTAGCT	GCCAAT	34906	38	F	5	67	Norm_bc	P2
CTATAC	ATCACG	16347	39	G	5	68	HBeAg	P2
CTATAC	CGATGT	85283	39	G	5	68	HBsAg	P2
CTATAC	GCCAAT	42376	39	G	5	68	Norm_bc	P2
CTATCT	ATCACG	12517	52	D	7	73	HBeAg	P2
CTATCT	CGATGT	64564	52	D	7	73	HBsAg	P2
CTATCT	GCCAAT	29659	52	D	7	73	Norm_bc	P2
CTCAGA	ATCACG	2802	40	H	5	69	HBeAg	P2
CTCAGA	CGATGT	14324	40	H	5	69	HBsAg	P2
CTCAGA	GCCAAT	8753	40	H	5	69	Norm_bc	P2
CTGCAT	ATCACG	17758	80	H	10	85	HBeAg	P2
CTGCAT	CGATGT	92134	80	H	10	85	HBsAg	P2
CTGCAT	GCCAAT	46574	80	H	10	85	Norm_bc	P2
CTTGTA	ATCACG	16654	12	D	2	49	HBeAg	P2
CTTGTA	CGATGT	84367	12	D	2	49	HBsAg	P2
CTTGTA	GCCAAT	42519	12	D	2	49	Norm_bc	P2
GAATGC	ATCACG	1123	91	C	12	88	HBeAg	P2
GAATGC	CGATGT	5377	91	C	12	88	HBsAg	P2
GAATGC	GCCAAT	6935	91	C	12	88	Norm_bc	P2
GACGAC	ATCACG	5303	41	A	6	62	HBeAg	P2
GACGAC	CGATGT	29663	41	A	6	62	HBsAg	P2
GACGAC	GCCAAT	17014	41	A	6	62	Norm_bc	P2
GACGAT	ATCACG	14774	62	F	8	75	HBeAg	P2
GACGAT	CGATGT	75442	62	F	8	75	HBsAg	P2
GACGAT	GCCAAT	48584	62	F	8	75	Norm_bc	P2
GAGCGC	ATCACG	7123	66	B	9	79	HBeAg	P2
GAGCGC	CGATGT	36048	66	B	9	79	HBsAg	P2
GAGCGC	GCCAAT	31491	66	B	9	79	Norm_bc	P2
GAGTCT	ATCACG	3226	69	E	9	82	HBeAg	P2
GAGTCT	CGATGT	15891	69	E	9	82	HBsAg	P2
GAGTCT	GCCAAT	18499	69	E	9	82	Norm_bc	P2
GAGTGG	ATCACG	4636	23	G	3	60	HBeAg	P2
GAGTGG	CGATGT	20737	23	G	3	60	HBsAg	P2
GAGTGG	GCCAAT	14760	23	G	3	60	Norm_bc	P2
GATCAG	ATCACG	3837	9	A	2	46	HBeAg	P2
GATCAG	CGATGT	19270	9	A	2	46	HBsAg	P2
GATCAG	GCCAAT	15137	9	A	2	46	Norm_bc	P2
GCCAAT	ATCACG	5396	6	F	1	51	HBeAg	P2
GCCAAT	CGATGT	28828	6	F	1	51	HBsAg	P2
GCCAAT	GCCAAT	18285	6	F	1	51	Norm_bc	P2
GGAGAA	ATCACG	8105	73	A	10	78	HBeAg	P2
GGAGAA	CGATGT	40261	73	A	10	78	HBsAg	P2
GGAGAA	GCCAAT	32352	73	A	10	78	Norm_bc	P2
GGCTAC	ATCACG	3053	11	C	2	48	HBeAg	P2
GGCTAC	CGATGT	14900	11	C	2	48	HBsAg	P2
GGCTAC	GCCAAT	11723	11	C	2	48	Norm_bc	P2
GGTAGC	ATCACG	14581	24	H	3	61	HBeAg	P2
GGTAGC	CGATGT	74565	24	H	3	61	HBsAg	P2
GGTAGC	GCCAAT	42129	24	H	3	61	Norm_bc	P2
GTACTT	ATCACG	6975	49	A	7	70	HBeAg	P2
GTACTT	CGATGT	36386	49	A	7	70	HBsAg	P2
GTACTT	GCCAAT	22615	49	A	7	70	Norm_bc	P2
GTAGAG	ATCACG	23440	17	A	3	54	HBeAg	P2
GTAGAG	CGATGT	126430	17	A	3	54	HBsAg	P2
GTAGAG	GCCAAT	58966	17	A	3	54	Norm_bc	P2
GTCCGC	ATCACG	15258	18	B	3	55	HBeAg	P2
GTCCGC	CGATGT	81631	18	B	3	55	HBsAg	P2
GTCCGC	GCCAAT	40637	18	B	3	55	Norm_bc	P2
GTGAAA	ATCACG	14921	19	C	3	56	HBeAg	P2
GTGAAA	CGATGT	77200	19	C	3	56	HBsAg	P2
GTGAAA	GCCAAT	50296	19	C	3	56	Norm_bc	P2
GTGAGA	ATCACG	11919	87	G	11	Negative	HBeAg	P2
GTGAGA	CGATGT	59094	87	G	11	Negative	HBsAg	P2
GTGAGA	GCCAAT	49840	87	G	11	Negative	Norm_bc	P2
GTGGCC	ATCACG	2924	20	D	3	57	HBeAg	P2
GTGGCC	CGATGT	14319	20	D	3	57	HBsAg	P2
GTGGCC	GCCAAT	8641	20	D	3	57	Norm_bc	P2
GTGTAT	ATCACG	2625	90	B	12	87	HBeAg	P2
GTGTAT	CGATGT	12577	90	B	12	87	HBsAg	P2
GTGTAT	GCCAAT	14106	90	B	12	87	Norm_bc	P2
GTTACC	ATCACG	2618	83	C	11	88	HBeAg	P2
GTTACC	CGATGT	12815	83	C	11	88	HBsAg	P2
GTTACC	GCCAAT	15617	83	C	11	88	Norm_bc	P2
GTTTCG	ATCACG	2394	21	E	3	58	HBeAg	P2
GTTTCG	CGATGT	11541	21	E	3	58	HBsAg	P2
GTTTCG	GCCAAT	7641	21	E	3	58	Norm_bc	P2
TAACCG	ATCACG	2369	77	E	10	82	HBeAg	P2
TAACCG	CGATGT	11448	77	E	10	82	HBsAg	P2
TAACCG	GCCAAT	11550	77	E	10	82	Norm_bc	P2
TAAGAC	ATCACG	16052	88	H	11	Blank	HBeAg	P2
TAAGAC	CGATGT	79642	88	H	11	Blank	HBsAg	P2
TAAGAC	GCCAAT	48970	88	H	11	Blank	Norm_bc	P2
TAATCG	ATCACG	9843	42	B	6	63	HBeAg	P2
TAATCG	CGATGT	50365	42	B	6	63	HBsAg	P2
TAATCG	GCCAAT	30400	42	B	6	63	Norm_bc	P2
TACAGC	ATCACG	2482	43	C	6	64	HBeAg	P2
TACAGC	CGATGT	12349	43	C	6	64	HBsAg	P2
TACAGC	GCCAAT	6875	43	C	6	64	Norm_bc	P2
TACCTT	ATCACG	16248	65	A	9	78	HBeAg	P2
TACCTT	CGATGT	85313	65	A	9	78	HBsAg	P2
TACCTT	GCCAAT	47290	65	A	9	78	Norm_bc	P2
TAGCTT	ATCACG	5013	10	B	2	47	HBeAg	P2
TAGCTT	CGATGT	25011	10	B	2	47	HBsAg	P2
TAGCTT	GCCAAT	16686	10	B	2	47	Norm_bc	P2
TATAAT	ATCACG	9931	44	D	6	65	HBeAg	P2
TATAAT	CGATGT	50596	44	D	6	65	HBsAg	P2
TATAAT	GCCAAT	32754	44	D	6	65	Norm_bc	P2
TATATC	ATCACG	3725	53	E	7	74	HBeAg	P2
TATATC	CGATGT	19003	53	E	7	74	HBsAg	P2
TATATC	GCCAAT	14510	53	E	7	74	Norm_bc	P2
TATGCA	ATCACG	1811	75	C	10	80	HBeAg	P2
TATGCA	CGATGT	8990	75	C	10	80	HBsAg	P2
TATGCA	GCCAAT	7856	75	C	10	80	Norm_bc	P2
TATTAT	ATCACG	9005	54	F	7	75	HBeAg	P2
TATTAT	CGATGT	46534	54	F	7	75	HBsAg	P2
TATTAT	GCCAAT	24349	54	F	7	75	Norm_bc	P2
TCATTC	ATCACG	9272	45	E	6	66	HBeAg	P2
TCATTC	CGATGT	48834	45	E	6	66	HBsAg	P2
TCATTC	GCCAAT	36538	45	E	6	66	Norm_bc	P2
TCCACA	ATCACG	13997	56	H	7	77	HBeAg	P2
TCCACA	CGATGT	75598	56	H	7	77	HBsAg	P2
TCCACA	GCCAAT	35742	56	H	7	77	Norm_bc	P2
TCCCGA	ATCACG	13108	46	F	6	67	HBeAg	P2
TCCCGA	CGATGT	67526	46	F	6	67	HBsAg	P2
TCCCGA	GCCAAT	39757	46	F	6	67	Norm_bc	P2
TCCTGC	ATCACG	14830	58	B	8	71	HBeAg	P2
TCCTGC	CGATGT	77241	58	B	8	71	HBsAg	P2
TCCTGC	GCCAAT	38607	58	B	8	71	Norm_bc	P2
TCGAAG	ATCACG	19879	47	G	6	68	HBeAg	P2
TCGAAG	CGATGT	103227	47	G	6	68	HBsAg	P2
TCGAAG	GCCAAT	53973	47	G	6	68	Norm_bc	P2
TCGGCA	ATCACG	20004	48	H	6	69	HBeAg	P2
TCGGCA	CGATGT	104552	48	H	6	69	HBsAg	P2
TCGGCA	GCCAAT	50368	48	H	6	69	Norm_bc	P2
TGACCA	ATCACG	24782	4	D	1	49	HBeAg	P2
TGACCA	CGATGT	130027	4	D	1	49	HBsAg	P2
TGACCA	GCCAAT	58571	4	D	1	49	Norm_bc	P2
TGCGCT	ATCACG	19148	60	D	8	73	HBeAg	P2
TGCGCT	CGATGT	97561	60	D	8	73	HBsAg	P2
TGCGCT	GCCAAT	47276	60	D	8	73	Norm_bc	P2
TGGAGC	ATCACG	16098	79	G	10	84	HBeAg	P2
TGGAGC	CGATGT	84865	79	G	10	84	HBsAg	P2
TGGAGC	GCCAAT	50557	79	G	10	84	Norm_bc	P2
TTAGGC	ATCACG	23916	3	C	1	48	HBeAg	P2
TTAGGC	CGATGT	125073	3	C	1	48	HBsAg	P2
TTAGGC	GCCAAT	54898	3	C	1	48	Norm_bc	P2
TTCTCG	ATCACG	12270	57	A	8	70	HBeAg	P2
TTCTCG	CGATGT	62586	57	A	8	70	HBsAg	P2
TTCTCG	GCCAAT	41906	57	A	8	70	Norm_bc	P2
TTGCGG	ATCACG	20794	63	G	8	76	HBeAg	P2
TTGCGG	CGATGT	104139	63	G	8	76	HBsAg	P2
TTGCGG	GCCAAT	54277	63	G	8	76	Norm_bc	P2
AACGGA	ATCACG	2315	61	E	8	119	HBeAg	P3
AACGGA	CGATGT	13387	61	E	8	119	HBsAg	P3
AACGGA	GCCAAT	9534	61	E	8	119	Norm_bc	P3
AAGGAG	ATCACG	15205	51	C	7	117	HBeAg	P3
AAGGAG	CGATGT	84134	51	C	7	117	HBsAg	P3
AAGGAG	GCCAAT	36739	51	C	7	117	Norm_bc	P3
AATCGT	ATCACG	1523	68	D	9	126	HBeAg	P3
AATCGT	CGATGT	9728	68	D	9	126	HBsAg	P3
AATCGT	GCCAAT	6839	68	D	9	126	Norm_bc	P3
AATTCC	ATCACG	17553	71	G	9	129	HBeAg	P3
AATTCC	CGATGT	2763420	71	G	9	129	HBsAg	P3
AATTCC	GCCAAT	40938	71	G	9	129	Norm_bc	P3
ACAGTG	ATCACG	2976	5	E	1	95	HBeAg	P3
ACAGTG	CGATGT	17073	5	E	1	95	HBsAg	P3
ACAGTG	GCCAAT	12013	5	E	1	95	Norm_bc	P3
ACCTTA	ATCACG	435	95	G	12	Negative	HBeAg	P3
ACCTTA	CGATGT	2583	95	G	12	Negative	HBsAg	P3
ACCTTA	GCCAAT	1496	95	G	12	Negative	Norm_bc	P3
ACGAGG	ATCACG	1293	67	C	9	125	HBeAg	P3
ACGAGG	CGATGT	7638	67	C	9	125	HBsAg	P3
ACGAGG	GCCAAT	5910	67	C	9	125	Norm_bc	P3
ACTGAT	ATCACG	8965	25	A	4	99	HBeAg	P3
ACTGAT	CGATGT	50259	25	A	4	99	HBsAg	P3
ACTGAT	GCCAAT	34062	25	A	4	99	Norm_bc	P3
ACTGCT	ATCACG	366	84	D	11	134	HBeAg	P3
ACTGCT	CGATGT	2505	84	D	11	134	HBsAg	P3
ACTGCT	GCCAAT	1877	84	D	11	134	Norm_bc	P3
ACTTGA	ATCACG	15106	8	H	1	98	HBeAg	P3
ACTTGA	CGATGT	87408	8	H	1	98	HBsAg	P3
ACTTGA	GCCAAT	34791	8	H	1	98	Norm_bc	P3
AGACCA	ATCACG	4824	70	F	9	128	HBeAg	P3
AGACCA	CGATGT	26722	70	F	9	128	HBsAg	P3
AGACCA	GCCAAT	32159	70	F	9	128	Norm_bc	P3
AGAGTA	ATCACG	772	92	D	12	134	HBeAg	P3
AGAGTA	CGATGT	6236	92	D	12	134	HBsAg	P3
AGAGTA	GCCAAT	3124	92	D	12	134	Norm_bc	P3
AGATGT	ATCACG	1030	72	H	9	130	HBeAg	P3
AGATGT	CGATGT	7394	72	H	9	130	HBsAg	P3
AGATGT	GCCAAT	4395	72	H	9	130	Norm_bc	P3
AGCACC	ATCACG	11190	55	G	7	121	HBeAg	P3
AGCACC	CGATGT	64916	55	G	7	121	HBsAg	P3
AGCACC	GCCAAT	37651	55	G	7	121	Norm_bc	P3
AGTCAA	ATCACG	1904	13	E	2	95	HBeAg	P3
AGTCAA	CGATGT	12262	13	E	2	95	HBsAg	P3
AGTCAA	GCCAAT	7822	13	E	2	95	Norm_bc	P3
AGTCCA	ATCACG	357	93	E	12	135	HBeAg	P3
AGTCCA	CGATGT	2254	93	E	12	135	HBsAg	P3
AGTCCA	GCCAAT	2418	93	E	12	135	Norm_bc	P3
AGTCTC	ATCACG	696	78	F	10	128	HBeAg	P3
AGTCTC	CGATGT	5123	78	F	10	128	HBsAg	P3
AGTCTC	GCCAAT	4407	78	F	10	128	Norm_bc	P3
AGTTCC	ATCACG	2928	14	F	2	96	HBeAg	P3
AGTTCC	CGATGT	18288	14	F	2	96	HBsAg	P3
AGTTCC	GCCAAT	11438	14	F	2	96	Norm_bc	P3
ATAGAT	ATCACG	734	74	B	10	124	HBeAg	P3
ATAGAT	CGATGT	4414	74	B	10	124	HBsAg	P3
ATAGAT	GCCAAT	2703	74	B	10	124	Norm_bc	P3
ATCACG	ATCACG	2848	1	A	1	91	HBeAg	P3
ATCACG	CGATGT	16648	1	A	1	91	HBsAg	P3
ATCACG	GCCAAT	12696	1	A	1	91	Norm_bc	P3
ATGAGC	ATCACG	3071	26	B	4	100	HBeAg	P3
ATGAGC	CGATGT	18691	26	B	4	100	HBsAg	P3
ATGAGC	GCCAAT	15417	26	B	4	100	Norm_bc	P3
ATGGCA	ATCACG	13093	50	B	7	116	HBeAg	P3
ATGGCA	CGATGT	72902	50	B	7	116	HBsAg	P3
ATGGCA	GCCAAT	35081	50	B	7	116	Norm_bc	P3
ATGTCA	ATCACG	4122	15	G	2	97	HBeAg	P3
ATGTCA	CGATGT	24319	15	G	2	97	HBsAg	P3
ATGTCA	GCCAAT	15759	15	G	2	97	Norm_bc	P3
ATTCCT	ATCACG	2259	27	C	4	101	HBeAg	P3
ATTCCT	CGATGT	13677	27	C	4	101	HBsAg	P3
ATTCCT	GCCAAT	13954	27	C	4	101	Norm_bc	P3
CAAAAG	ATCACG	5261	28	D	4	102	HBeAg	P3
CAAAAG	CGATGT	30132	28	D	4	102	HBsAg	P3
CAAAAG	GCCAAT	26370	28	D	4	102	Norm_bc	P3
CAACTA	ATCACG	5812	29	E	4	103	HBeAg	P3
CAACTA	CGATGT	32404	29	E	4	103	HBsAg	P3
CAACTA	GCCAAT	33583	29	E	4	103	Norm_bc	P3
CAAGTT	ATCACG	794	64	H	8	122	HBeAg	P3
CAAGTT	CGATGT	4956	64	H	8	122	HBsAg	P3
CAAGTT	GCCAAT	2685	64	H	8	122	Norm_bc	P3
CACCGG	ATCACG	1025	30	F	4	104	HBeAg	P3
CACCGG	CGATGT	6409	30	F	4	104	HBsAg	P3
CACCGG	GCCAAT	3991	30	F	4	104	Norm_bc	P3
CACGAT	ATCACG	1513	31	G	4	105	HBeAg	P3
CACGAT	CGATGT	9236	31	G	4	105	HBsAg	P3
CACGAT	GCCAAT	6838	31	G	4	105	Norm_bc	P3
CACTCA	ATCACG	12334	32	H	4	106	HBeAg	P3
CACTCA	CGATGT	72459	32	H	4	106	HBsAg	P3
CACTCA	GCCAAT	34664	32	H	4	106	Norm_bc	P3
CAGATC	ATCACG	7038	7	G	1	97	HBeAg	P3
CAGATC	CGATGT	40266	7	G	1	97	HBsAg	P3
CAGATC	GCCAAT	23295	7	G	1	97	Norm_bc	P3
CAGGCC	ATCACG	740	81	A	11	131	HBeAg	P3
CAGGCC	CGATGT	5027	81	A	11	131	HBsAg	P3
CAGGCC	GCCAAT	2414	81	A	11	131	Norm_bc	P3
CAGGCG	ATCACG	2463	33	A	5	107	HBeAg	P3
CAGGCG	CGATGT	14580	33	A	5	107	HBsAg	P3
CAGGCG	GCCAAT	11617	33	A	5	107	Norm_bc	P3
CAGTAA	ATCACG	415	82	B	11	132	HBeAg	P3
CAGTAA	CGATGT	2397	82	B	11	132	HBsAg	P3
CAGTAA	GCCAAT	2187	82	B	11	132	Norm_bc	P3
CATGGC	ATCACG	7603	34	B	5	108	HBeAg	P3
CATGGC	CGATGT	41007	34	B	5	108	HBsAg	P3
CATGGC	GCCAAT	29710	34	B	5	108	Norm_bc	P3
CATTTT	ATCACG	580	35	C	5	109	HBeAg	P3
CATTTT	CGATGT	3692	35	C	5	109	HBsAg	P3
CATTTT	GCCAAT	2671	35	C	5	109	Norm_bc	P3
CCAACA	ATCACG	1053	36	D	5	110	HBeAg	P3
CCAACA	CGATGT	6530	36	D	5	110	HBsAg	P3
CCAACA	GCCAAT	5837	36	D	5	110	Norm_bc	P3
CCGTCC	ATCACG	14641	16	H	2	98	HBeAg	P3
CCGTCC	CGATGT	84635	16	H	2	98	HBsAg	P3
CCGTCC	GCCAAT	35241	16	H	2	98	Norm_bc	P3
CCTATT	ATCACG	405	76	D	10	126	HBeAg	P3
CCTATT	CGATGT	2182	76	D	10	126	HBsAg	P3
CCTATT	GCCAAT	2724	76	D	10	126	Norm_bc	P3
CGATGT	ATCACG	1924	2	B	1	92	HBeAg	P3
CGATGT	CGATGT	12072	2	B	1	92	HBsAg	P3
CGATGT	GCCAAT	9363	2	B	1	92	Norm_bc	P3
CGCCAA	ATCACG	456	96	H	12	Blank	HBeAg	P3
CGCCAA	CGATGT	3052	96	H	12	Blank	HBsAg	P3
CGCCAA	GCCAAT	2232	96	H	12	Blank	Norm_bc	P3
CGCGGC	ATCACG	14288	59	C	8	117	HBeAg	P3
CGCGGC	CGATGT	78512	59	C	8	117	HBsAg	P3
CGCGGC	GCCAAT	35683	59	C	8	117	Norm_bc	P3
CGGAAT	ATCACG	7208	37	E	5	111	HBeAg	P3
CGGAAT	CGATGT	40895	37	E	5	111	HBsAg	P3
CGGAAT	GCCAAT	43504	37	E	5	111	Norm_bc	P3
CGTACG	ATCACG	1295	22	F	3	104	HBeAg	P3
CGTACG	CGATGT	7633	22	F	3	104	HBsAg	P3
CGTACG	GCCAAT	4667	22	F	3	104	Norm_bc	P3
CGTTAG	ATCACG	908	89	A	12	131	HBeAg	P3
CGTTAG	CGATGT	5944	89	A	12	131	HBsAg	P3
CGTTAG	GCCAAT	3518	89	A	12	131	Norm_bc	P3
CTAAGG	ATCACG	878	85	E	11	135	HBeAg	P3
CTAAGG	CGATGT	6682	85	E	11	135	HBsAg	P3
CTAAGG	GCCAAT	3553	85	E	11	135	Norm_bc	P3
CTAGCT	ATCACG	5967	38	F	5	112	HBeAg	P3
CTAGCT	CGATGT	34874	38	F	5	112	HBsAg	P3
CTAGCT	GCCAAT	24001	38	F	5	112	Norm_bc	P3
CTATAC	ATCACG	9594	39	G	5	113	HBeAg	P3
CTATAC	CGATGT	54182	39	G	5	113	HBsAg	P3
CTATAC	GCCAAT	31089	39	G	5	113	Norm_bc	P3
CTATCT	ATCACG	2346	52	D	7	118	HBeAg	P3
CTATCT	CGATGT	12825	52	D	7	118	HBsAg	P3
CTATCT	GCCAAT	7040	52	D	7	118	Norm_bc	P3
CTCAGA	ATCACG	10500	40	H	5	114	HBeAg	P3
CTCAGA	CGATGT	59165	40	H	5	114	HBsAg	P3
CTCAGA	GCCAAT	30590	40	H	5	114	Norm_bc	P3
CTGCAT	ATCACG	1466	80	H	10	130	HBeAg	P3
CTGCAT	CGATGT	8946	80	H	10	130	HBsAg	P3
CTGCAT	GCCAAT	6084	80	H	10	130	Norm_bc	P3
CTTGTA	ATCACG	1439	12	D	2	94	HBeAg	P3
CTTGTA	CGATGT	9067	12	D	2	94	HBsAg	P3
CTTGTA	GCCAAT	7513	12	D	2	94	Norm_bc	P3
GAATGC	ATCACG	494	91	C	12	133	HBeAg	P3
GAATGC	CGATGT	3744	91	C	12	133	HBsAg	P3
GAATGC	GCCAAT	1861	91	C	12	133	Norm_bc	P3
GACGAC	ATCACG	4351	41	A	6	107	HBeAg	P3
GACGAC	CGATGT	23626	41	A	6	107	HBsAg	P3
GACGAC	GCCAAT	19850	41	A	6	107	Norm_bc	P3
GACGAT	ATCACG	7326	62	F	8	120	HBeAg	P3
GACGAT	CGATGT	40949	62	F	8	120	HBsAg	P3
GACGAT	GCCAAT	40726	62	F	8	120	Norm_bc	P3
GAGCGC	ATCACG	1735	66	B	9	124	HBeAg	P3
GAGCGC	CGATGT	11087	66	B	9	124	HBsAg	P3
GAGCGC	GCCAAT	7634	66	B	9	124	Norm_bc	P3
GAGTCT	ATCACG	2151	69	E	9	127	HBeAg	P3
GAGTCT	CGATGT	13355	69	E	9	127	HBsAg	P3
GAGTCT	GCCAAT	10196	69	E	9	127	Norm_bc	P3
GAGTGG	ATCACG	3992	23	G	3	105	HBeAg	P3
GAGTGG	CGATGT	25089	23	G	3	105	HBsAg	P3
GAGTGG	GCCAAT	16602	23	G	3	105	Norm_bc	P3
GATCAG	ATCACG	2454	9	A	2	91	HBeAg	P3
GATCAG	CGATGT	14395	9	A	2	91	HBsAg	P3
GATCAG	GCCAAT	10883	9	A	2	91	Norm_bc	P3
GCCAAT	ATCACG	6373	6	F	1	96	HBeAg	P3
GCCAAT	CGATGT	35967	6	F	1	96	HBsAg	P3
GCCAAT	GCCAAT	25558	6	F	1	96	Norm_bc	P3
GGAGAA	ATCACG	1555	73	A	10	123	HBeAg	P3
GGAGAA	CGATGT	10310	73	A	10	123	HBsAg	P3
GGAGAA	GCCAAT	6324	73	A	10	123	Norm_bc	P3
GGCTAC	ATCACG	9751	11	C	2	93	HBeAg	P3
GGCTAC	CGATGT	55654	11	C	2	93	HBsAg	P3
GGCTAC	GCCAAT	35994	11	C	2	93	Norm_bc	P3
GGTAGC	ATCACG	12705	24	H	3	106	HBeAg	P3
GGTAGC	CGATGT	76554	24	H	3	106	HBsAg	P3
GGTAGC	GCCAAT	37350	24	H	3	106	Norm_bc	P3
GTACTT	ATCACG	955	49	A	7	115	HBeAg	P3
GTACTT	CGATGT	5598	49	A	7	115	HBsAg	P3
GTACTT	GCCAAT	4228	49	A	7	115	Norm_bc	P3
GTAGAG	ATCACG	9027	17	A	3	99	HBeAg	P3
GTAGAG	CGATGT	52331	17	A	3	99	HBsAg	P3
GTAGAG	GCCAAT	40882	17	A	3	99	Norm_bc	P3
GTCCGC	ATCACG	2865	18	B	3	100	HBeAg	P3
GTCCGC	CGATGT	15829	18	B	3	100	HBsAg	P3
GTCCGC	GCCAAT	14192	18	B	3	100	Norm_bc	P3
GTGAAA	ATCACG	6520	19	C	3	101	HBeAg	P3
GTGAAA	CGATGT	36338	19	C	3	101	HBsAg	P3
GTGAAA	GCCAAT	30281	19	C	3	101	Norm_bc	P3
GTGAGA	ATCACG	1003	87	G	11	Negative	HBeAg	P3
GTGAGA	CGATGT	7601	87	G	11	Negative	HBsAg	P3
GTGAGA	GCCAAT	3555	87	G	11	Negative	Norm_bc	P3
GTGGCC	ATCACG	6429	20	D	3	102	HBeAg	P3
GTGGCC	CGATGT	37154	20	D	3	102	HBsAg	P3
GTGGCC	GCCAAT	32881	20	D	3	102	Norm_bc	P3
GTGTAT	ATCACG	764	90	B	12	132	HBeAg	P3
GTGTAT	CGATGT	5701	90	B	12	132	HBsAg	P3
GTGTAT	GCCAAT	2749	90	B	12	132	Norm_bc	P3
GTTACC	ATCACG	412	83	C	11	133	HBeAg	P3
GTTACC	CGATGT	3477	83	C	11	133	HBsAg	P3
GTTACC	GCCAAT	2124	83	C	11	133	Norm_bc	P3
GTTTCG	ATCACG	11372	21	E	3	103	HBeAg	P3
GTTTCG	CGATGT	54474	21	E	3	103	HBsAg	P3
GTTTCG	GCCAAT	35980	21	E	3	103	Norm_bc	P3
TAACCG	ATCACG	689	77	E	10	127	HBeAg	P3
TAACCG	CGATGT	4473	77	E	10	127	HBsAg	P3
TAACCG	GCCAAT	3072	77	E	10	127	Norm_bc	P3
TAAGAC	ATCACG	795	88	H	11	Blank	HBeAg	P3
TAAGAC	CGATGT	6276	88	H	11	Blank	HBsAg	P3
TAAGAC	GCCAAT	4259	88	H	11	Blank	Norm_bc	P3
TAATCG	ATCACG	18084	42	B	6	108	HBeAg	P3
TAATCG	CGATGT	128918	42	B	6	108	HBsAg	P3
TAATCG	GCCAAT	40155	42	B	6	108	Norm_bc	P3
TACAGC	ATCACG	4110	43	C	6	109	HBeAg	P3
TACAGC	CGATGT	23006	43	C	6	109	HBsAg	P3
TACAGC	GCCAAT	22990	43	C	6	109	Norm_bc	P3
TACCTT	ATCACG	1850	65	A	9	123	HBeAg	P3
TACCTT	CGATGT	10663	65	A	9	123	HBsAg	P3
TACCTT	GCCAAT	8088	65	A	9	123	Norm_bc	P3
TAGCTT	ATCACG	1697	10	B	2	92	HBeAg	P3
TAGCTT	CGATGT	11019	10	B	2	92	HBsAg	P3
TAGCTT	GCCAAT	8023	10	B	2	92	Norm_bc	P3
TATAAT	ATCACG	2878	44	D	6	110	HBeAg	P3
TATAAT	CGATGT	15543	44	D	6	110	HBsAg	P3
TATAAT	GCCAAT	16182	44	D	6	110	Norm_bc	P3
TATATC	ATCACG	1835	53	E	7	119	HBeAg	P3
TATATC	CGATGT	10742	53	E	7	119	HBsAg	P3
TATATC	GCCAAT	8708	53	E	7	119	Norm_bc	P3
TATGCA	ATCACG	640	75	C	10	125	HBeAg	P3
TATGCA	CGATGT	4606	75	C	10	125	HBsAg	P3
TATGCA	GCCAAT	3606	75	C	10	125	Norm_bc	P3
TATTAT	ATCACG	11427	54	F	7	120	HBeAg	P3
TATTAT	CGATGT	65178	54	F	7	120	HBsAg	P3
TATTAT	GCCAAT	44357	54	F	7	120	Norm_bc	P3
TCATTC	ATCACG	3315	45	E	6	111	HBeAg	P3
TCATTC	CGATGT	18779	45	E	6	111	HBsAg	P3
TCATTC	GCCAAT	25827	45	E	6	111	Norm_bc	P3
TCCACA	ATCACG	11114	56	H	7	122	HBeAg	P3
TCCACA	CGATGT	64504	56	H	7	122	HBsAg	P3
TCCACA	GCCAAT	36432	56	H	7	122	Norm_bc	P3
TCCCGA	ATCACG	8599	46	F	6	112	HBeAg	P3
TCCCGA	CGATGT	48873	46	F	6	112	HBsAg	P3
TCCCGA	GCCAAT	42563	46	F	6	112	Norm_bc	P3
TCCTGC	ATCACG	14024	58	B	8	116	HBeAg	P3
TCCTGC	CGATGT	78783	58	B	8	116	HBsAg	P3
TCCTGC	GCCAAT	36335	58	B	8	116	Norm_bc	P3
TCGAAG	ATCACG	12385	47	G	6	113	HBeAg	P3
TCGAAG	CGATGT	72463	47	G	6	113	HBsAg	P3
TCGAAG	GCCAAT	42297	47	G	6	113	Norm_bc	P3
TCGGCA	ATCACG	6483	48	H	6	114	HBeAg	P3
TCGGCA	CGATGT	36780	48	H	6	114	HBsAg	P3
TCGGCA	GCCAAT	29396	48	H	6	114	Norm_bc	P3
TGACCA	ATCACG	3363	4	D	1	94	HBeAg	P3
TGACCA	CGATGT	20175	4	D	1	94	HBsAg	P3
TGACCA	GCCAAT	13322	4	D	1	94	Norm_bc	P3
TGCGCT	ATCACG	1137	60	D	8	118	HBeAg	P3
TGCGCT	CGATGT	8114	60	D	8	118	HBsAg	P3
TGCGCT	GCCAAT	3599	60	D	8	118	Norm_bc	P3
TGGAGC	ATCACG	1323	79	G	10	129	HBeAg	P3
TGGAGC	CGATGT	170463	79	G	10	129	HBsAg	P3
TGGAGC	GCCAAT	4320	79	G	10	129	Norm_bc	P3
TTAGGC	ATCACG	4372	3	C	1	93	HBeAg	P3
TTAGGC	CGATGT	26409	3	C	1	93	HBsAg	P3
TTAGGC	GCCAAT	16695	3	C	1	93	Norm_bc	P3
TTCTCG	ATCACG	1150	57	A	8	115	HBeAg	P3
TTCTCG	CGATGT	6659	57	A	8	115	HBsAg	P3
TTCTCG	GCCAAT	4395	57	A	8	115	Norm_bc	P3
TTGCGG	ATCACG	11306	63	G	8	121	HBeAg	P3
TTGCGG	CGATGT	67288	63	G	8	121	HBsAg	P3
TTGCGG	GCCAAT	40973	63	G	8	121	Norm_bc	P3
AACGGA	ATCACG	759	61	E	8	164	HBeAg	P4
AACGGA	CGATGT	4116	61	E	8	164	HBsAg	P4
AACGGA	GCCAAT	3535	61	E	8	164	Norm_bc	P4
AAGGAG	ATCACG	15838	51	C	7	162	HBeAg	P4
AAGGAG	CGATGT	87714	51	C	7	162	HBsAg	P4
AAGGAG	GCCAAT	32536	51	C	7	162	Norm_bc	P4
AATCGT	ATCACG	12280	68	D	9	171	HBeAg	P4
AATCGT	CGATGT	74190	68	D	9	171	HBsAg	P4
AATCGT	GCCAAT	38115	68	D	9	171	Norm_bc	P4
AATTCC	ATCACG	7450	71	G	9	174	HBeAg	P4
AATTCC	CGATGT	43729	71	G	9	174	HBsAg	P4
AATTCC	GCCAAT	31520	71	G	9	174	Norm_bc	P4
ACAGTG	ATCACG	1147	5	E	1	140	HBeAg	P4
ACAGTG	CGATGT	6684	5	E	1	140	HBsAg	P4
ACAGTG	GCCAAT	4175	5	E	1	140	Norm_bc	P4
ACCTTA	ATCACG	8961	95	G	12	Negative	HBeAg	P4
ACCTTA	CGATGT	56156	95	G	12	Negative	HBsAg	P4
ACCTTA	GCCAAT	21234	95	G	12	Negative	Norm_bc	P4
ACGAGG	ATCACG	770	67	C	9	170	HBeAg	P4
ACGAGG	CGATGT	4330	67	C	9	170	HBsAg	P4
ACGAGG	GCCAAT	2760	67	C	9	170	Norm_bc	P4
ACTGAT	ATCACG	12644	25	A	4	144	HBeAg	P4
ACTGAT	CGATGT	70080	25	A	4	144	HBsAg	P4
ACTGAT	GCCAAT	32418	25	A	4	144	Norm_bc	P4
ACTGCT	ATCACG	11612	84	D	11	179	HBeAg	P4
ACTGCT	CGATGT	69625	84	D	11	179	HBsAg	P4
ACTGCT	GCCAAT	22090	84	D	11	179	Norm_bc	P4
ACTTGA	ATCACG	12753	8	H	1	143	HBeAg	P4
ACTTGA	CGATGT	74501	8	H	1	143	HBsAg	P4
ACTTGA	GCCAAT	34908	8	H	1	143	Norm_bc	P4
AGACCA	ATCACG	3082	70	F	9	173	HBeAg	P4
AGACCA	CGATGT	16653	70	F	9	173	HBsAg	P4
AGACCA	GCCAAT	19969	70	F	9	173	Norm_bc	P4
AGAGTA	ATCACG	1119	92	D	12	179	HBeAg	P4
AGAGTA	CGATGT	6900	92	D	12	179	HBsAg	P4
AGAGTA	GCCAAT	7277	92	D	12	179	Norm_bc	P4
AGATGT	ATCACG	11919	72	H	9	175	HBeAg	P4
AGATGT	CGATGT	83868	72	H	9	175	HBsAg	P4
AGATGT	GCCAAT	36622	72	H	9	175	Norm_bc	P4
AGCACC	ATCACG	10612	55	G	7	166	HBeAg	P4
AGCACC	CGATGT	61119	55	G	7	166	HBsAg	P4
AGCACC	GCCAAT	32493	55	G	7	166	Norm_bc	P4
AGTCAA	ATCACG	1113	13	E	2	140	HBeAg	P4
AGTCAA	CGATGT	6313	13	E	2	140	HBsAg	P4
AGTCAA	GCCAAT	3879	13	E	2	140	Norm_bc	P4
AGTCCA	ATCACG	6337	93	E	12	180	HBeAg	P4
AGTCCA	CGATGT	37033	93	E	12	180	HBsAg	P4
AGTCCA	GCCAAT	28448	93	E	12	180	Norm_bc	P4
AGTCTC	ATCACG	6515	78	F	10	173	HBeAg	P4
AGTCTC	CGATGT	36910	78	F	10	173	HBsAg	P4
AGTCTC	GCCAAT	32429	78	F	10	173	Norm_bc	P4
AGTTCC	ATCACG	988	14	F	2	141	HBeAg	P4
AGTTCC	CGATGT	5797	14	F	2	141	HBsAg	P4
AGTTCC	GCCAAT	4128	14	F	2	141	Norm_bc	P4
ATAGAT	ATCACG	1072	74	B	10	169	HBeAg	P4
ATAGAT	CGATGT	104856	74	B	10	169	HBsAg	P4
ATAGAT	GCCAAT	4541	74	B	10	169	Norm_bc	P4
ATCACG	ATCACG	1881	1	A	1	136	HBeAg	P4
ATCACG	CGATGT	10916	1	A	1	136	HBsAg	P4
ATCACG	GCCAAT	7422	1	A	1	136	Norm_bc	P4
ATGAGC	ATCACG	1004	26	B	4	145	HBeAg	P4
ATGAGC	CGATGT	5905	26	B	4	145	HBsAg	P4
ATGAGC	GCCAAT	5007	26	B	4	145	Norm_bc	P4
ATGGCA	ATCACG	937	50	B	7	161	HBeAg	P4
ATGGCA	CGATGT	5559	50	B	7	161	HBsAg	P4
ATGGCA	GCCAAT	2917	50	B	7	161	Norm_bc	P4
ATGTCA	ATCACG	2734	15	G	2	142	HBeAg	P4
ATGTCA	CGATGT	16568	15	G	2	142	HBsAg	P4
ATGTCA	GCCAAT	8336	15	G	2	142	Norm_bc	P4
ATTCCT	ATCACG	550	27	C	4	146	HBeAg	P4
ATTCCT	CGATGT	3235	27	C	4	146	HBsAg	P4
ATTCCT	GCCAAT	3221	27	C	4	146	Norm_bc	P4
CAAAAG	ATCACG	775	28	D	4	147	HBeAg	P4
CAAAAG	CGATGT	4609	28	D	4	147	HBsAg	P4
CAAAAG	GCCAAT	2969	28	D	4	147	Norm_bc	P4
CAACTA	ATCACG	8830	29	E	4	148	HBeAg	P4
CAACTA	CGATGT	51706	29	E	4	148	HBsAg	P4
CAACTA	GCCAAT	25312	29	E	4	148	Norm_bc	P4
CAAGTT	ATCACG	9168	64	H	8	167	HBeAg	P4
CAAGTT	CGATGT	53718	64	H	8	167	HBsAg	P4
CAAGTT	GCCAAT	27749	64	H	8	167	Norm_bc	P4
CACCGG	ATCACG	555	30	F	4	149	HBeAg	P4
CACCGG	CGATGT	3189	30	F	4	149	HBsAg	P4
CACCGG	GCCAAT	1860	30	F	4	149	Norm_bc	P4
CACGAT	ATCACG	711	31	G	4	150	HBeAg	P4
CACGAT	CGATGT	4169	31	G	4	150	HBsAg	P4
CACGAT	GCCAAT	2492	31	G	4	150	Norm_bc	P4
CACTCA	ATCACG	7523	32	H	4	151	HBeAg	P4
CACTCA	CGATGT	43731	32	H	4	151	HBsAg	P4
CACTCA	GCCAAT	25914	32	H	4	151	Norm_bc	P4
CAGATC	ATCACG	17637	7	G	1	142	HBeAg	P4
CAGATC	CGATGT	102666	7	G	1	142	HBsAg	P4
CAGATC	GCCAAT	46628	7	G	1	142	Norm_bc	P4
CAGGCC	ATCACG	6049	81	A	11	176	HBeAg	P4
CAGGCC	CGATGT	33806	81	A	11	176	HBsAg	P4
CAGGCC	GCCAAT	26784	81	A	11	176	Norm_bc	P4
CAGGCG	ATCACG	12292	33	A	5	152	HBeAg	P4
CAGGCG	CGATGT	72186	33	A	5	152	HBsAg	P4
CAGGCG	GCCAAT	32218	33	A	5	152	Norm_bc	P4
CAGTAA	ATCACG	8497	82	B	11	177	HBeAg	P4
CAGTAA	CGATGT	54074	82	B	11	177	HBsAg	P4
CAGTAA	GCCAAT	19938	82	B	11	177	Norm_bc	P4
CATGGC	ATCACG	369	34	B	5	153	HBeAg	P4
CATGGC	CGATGT	2130	34	B	5	153	HBsAg	P4
CATGGC	GCCAAT	1512	34	B	5	153	Norm_bc	P4
CATTTT	ATCACG	411	35	C	5	154	HBeAg	P4
CATTTT	CGATGT	2417	35	C	5	154	HBsAg	P4
CATTTT	GCCAAT	1737	35	C	5	154	Norm_bc	P4
CCAACA	ATCACG	414	36	D	5	155	HBeAg	P4
CCAACA	CGATGT	2468	36	D	5	155	HBsAg	P4
CCAACA	GCCAAT	2123	36	D	5	155	Norm_bc	P4
CCGTCC	ATCACG	11302	16	H	2	143	HBeAg	P4
CCGTCC	CGATGT	64601	16	H	2	143	HBsAg	P4
CCGTCC	GCCAAT	30920	16	H	2	143	Norm_bc	P4
CCTATT	ATCACG	6315	76	D	10	171	HBeAg	P4
CCTATT	CGATGT	36704	76	D	10	171	HBsAg	P4
CCTATT	GCCAAT	26051	76	D	10	171	Norm_bc	P4
CGATGT	ATCACG	1533	2	B	1	137	HBeAg	P4
CGATGT	CGATGT	8927	2	B	1	137	HBsAg	P4
CGATGT	GCCAAT	6391	2	B	1	137	Norm_bc	P4
CGCCAA	ATCACG	224	96	H	12	Blank	HBeAg	P4
CGCCAA	CGATGT	1272	96	H	12	Blank	HBsAg	P4
CGCCAA	GCCAAT	5302	96	H	12	Blank	Norm_bc	P4
CGCGGC	ATCACG	13722	59	C	8	162	HBeAg	P4
CGCGGC	CGATGT	75880	59	C	8	162	HBsAg	P4
CGCGGC	GCCAAT	29279	59	C	8	162	Norm_bc	P4
CGGAAT	ATCACG	2063	37	E	5	156	HBeAg	P4
CGGAAT	CGATGT	12028	37	E	5	156	HBsAg	P4
CGGAAT	GCCAAT	6883	37	E	5	156	Norm_bc	P4
CGTACG	ATCACG	815	22	F	3	149	HBeAg	P4
CGTACG	CGATGT	4362	22	F	3	149	HBsAg	P4
CGTACG	GCCAAT	2544	22	F	3	149	Norm_bc	P4
CGTTAG	ATCACG	5319	89	A	12	176	HBeAg	P4
CGTTAG	CGATGT	31383	89	A	12	176	HBsAg	P4
CGTTAG	GCCAAT	29740	89	A	12	176	Norm_bc	P4
CTAAGG	ATCACG	1220	85	E	11	180	HBeAg	P4
CTAAGG	CGATGT	6715	85	E	11	180	HBsAg	P4
CTAAGG	GCCAAT	6080	85	E	11	180	Norm_bc	P4
CTAGCT	ATCACG	3471	38	F	5	157	HBeAg	P4
CTAGCT	CGATGT	19733	38	F	5	157	HBsAg	P4
CTAGCT	GCCAAT	14108	38	F	5	157	Norm_bc	P4
CTATAC	ATCACG	417	39	G	5	158	HBeAg	P4
CTATAC	CGATGT	2647	39	G	5	158	HBsAg	P4
CTATAC	GCCAAT	1955	39	G	5	158	Norm_bc	P4
CTATCT	ATCACG	15618	52	D	7	163	HBeAg	P4
CTATCT	CGATGT	1027104	52	D	7	163	HBsAg	P4
CTATCT	GCCAAT	29025	52	D	7	163	Norm_bc	P4
CTCAGA	ATCACG	2315	40	H	5	159	HBeAg	P4
CTCAGA	CGATGT	12815	40	H	5	159	HBsAg	P4
CTCAGA	GCCAAT	11118	40	H	5	159	Norm_bc	P4
CTGCAT	ATCACG	10314	80	H	10	175	HBeAg	P4
CTGCAT	CGATGT	72686	80	H	10	175	HBsAg	P4
CTGCAT	GCCAAT	31496	80	H	10	175	Norm_bc	P4
CTTGTA	ATCACG	719	12	D	2	139	HBeAg	P4
CTTGTA	CGATGT	4096	12	D	2	139	HBsAg	P4
CTTGTA	GCCAAT	2914	12	D	2	139	Norm_bc	P4
GAATGC	ATCACG	2255	91	C	12	178	HBeAg	P4
GAATGC	CGATGT	12761	91	C	12	178	HBsAg	P4
GAATGC	GCCAAT	18709	91	C	12	178	Norm_bc	P4
GACGAC	ATCACG	12576	41	A	6	152	HBeAg	P4
GACGAC	CGATGT	73261	41	A	6	152	HBsAg	P4
GACGAC	GCCAAT	36090	41	A	6	152	Norm_bc	P4
GACGAT	ATCACG	3630	62	F	8	165	HBeAg	P4
GACGAT	CGATGT	19379	62	F	8	165	HBsAg	P4
GACGAT	GCCAAT	22603	62	F	8	165	Norm_bc	P4
GAGCGC	ATCACG	1629	66	B	9	169	HBeAg	P4
GAGCGC	CGATGT	110785	66	B	9	169	HBsAg	P4
GAGCGC	GCCAAT	5269	66	B	9	169	Norm_bc	P4
GAGTCT	ATCACG	1003	69	E	9	172	HBeAg	P4
GAGTCT	CGATGT	6289	69	E	9	172	HBsAg	P4
GAGTCT	GCCAAT	5360	69	E	9	172	Norm_bc	P4
GAGTGG	ATCACG	4256	23	G	3	150	HBeAg	P4
GAGTGG	CGATGT	23275	23	G	3	150	HBsAg	P4
GAGTGG	GCCAAT	21267	23	G	3	150	Norm_bc	P4
GATCAG	ATCACG	9878	9	A	2	136	HBeAg	P4
GATCAG	CGATGT	56159	9	A	2	136	HBsAg	P4
GATCAG	GCCAAT	29067	9	A	2	136	Norm_bc	P4
GCCAAT	ATCACG	7994	6	F	1	141	HBeAg	P4
GCCAAT	CGATGT	45866	6	F	1	141	HBsAg	P4
GCCAAT	GCCAAT	25768	6	F	1	141	Norm_bc	P4
GGAGAA	ATCACG	7650	73	A	10	168	HBeAg	P4
GGAGAA	CGATGT	43719	73	A	10	168	HBsAg	P4
GGAGAA	GCCAAT	34104	73	A	10	168	Norm_bc	P4
GGCTAC	ATCACG	466	11	C	2	138	HBeAg	P4
GGCTAC	CGATGT	2902	11	C	2	138	HBsAg	P4
GGCTAC	GCCAAT	1281	11	C	2	138	Norm_bc	P4
GGTAGC	ATCACG	13119	24	H	3	151	HBeAg	P4
GGTAGC	CGATGT	77093	24	H	3	151	HBsAg	P4
GGTAGC	GCCAAT	34932	24	H	3	151	Norm_bc	P4
GTACTT	ATCACG	10120	49	A	7	160	HBeAg	P4
GTACTT	CGATGT	58187	49	A	7	160	HBsAg	P4
GTACTT	GCCAAT	26808	49	A	7	160	Norm_bc	P4
GTAGAG	ATCACG	14591	17	A	3	144	HBeAg	P4
GTAGAG	CGATGT	81873	17	A	3	144	HBsAg	P4
GTAGAG	GCCAAT	37378	17	A	3	144	Norm_bc	P4
GTCCGC	ATCACG	4909	18	B	3	145	HBeAg	P4
GTCCGC	CGATGT	27355	18	B	3	145	HBsAg	P4
GTCCGC	GCCAAT	26876	18	B	3	145	Norm_bc	P4
GTGAAA	ATCACG	8636	19	C	3	146	HBeAg	P4
GTGAAA	CGATGT	48439	19	C	3	146	HBsAg	P4
GTGAAA	GCCAAT	26224	19	C	3	146	Norm_bc	P4
GTGAGA	ATCACG	12963	87	G	11	Negative	HBeAg	P4
GTGAGA	CGATGT	74666	87	G	11	Negative	HBsAg	P4
GTGAGA	GCCAAT	32481	87	G	11	Negative	Norm_bc	P4
GTGGCC	ATCACG	749	20	D	3	147	HBeAg	P4
GTGGCC	CGATGT	4247	20	D	3	147	HBsAg	P4
GTGGCC	GCCAAT	2957	20	D	3	147	Norm_bc	P4
GTGTAT	ATCACG	16746	90	B	12	177	HBeAg	P4
GTGTAT	CGATGT	100962	90	B	12	177	HBsAg	P4
GTGTAT	GCCAAT	26033	90	B	12	177	Norm_bc	P4
GTTACC	ATCACG	10950	83	C	11	178	HBeAg	P4
GTTACC	CGATGT	68270	83	C	11	178	HBsAg	P4
GTTACC	GCCAAT	21003	83	C	11	178	Norm_bc	P4
GTTTCG	ATCACG	824	21	E	3	148	HBeAg	P4
GTTTCG	CGATGT	4779	21	E	3	148	HBsAg	P4
GTTTCG	GCCAAT	3034	21	E	3	148	Norm_bc	P4
TAACCG	ATCACG	831	77	E	10	172	HBeAg	P4
TAACCG	CGATGT	4450	77	E	10	172	HBsAg	P4
TAACCG	GCCAAT	4823	77	E	10	172	Norm_bc	P4
TAAGAC	ATCACG	13365	88	H	11	Blank	HBeAg	P4
TAAGAC	CGATGT	78569	88	H	11	Blank	HBsAg	P4
TAAGAC	GCCAAT	32165	88	H	11	Blank	Norm_bc	P4
TAATCG	ATCACG	1076	42	B	6	153	HBeAg	P4
TAATCG	CGATGT	6452	42	B	6	153	HBsAg	P4
TAATCG	GCCAAT	4584	42	B	6	153	Norm_bc	P4
TACAGC	ATCACG	1047	43	C	6	154	HBeAg	P4
TACAGC	CGATGT	5960	43	C	6	154	HBsAg	P4
TACAGC	GCCAAT	3716	43	C	6	154	Norm_bc	P4
TACCTT	ATCACG	7187	65	A	9	168	HBeAg	P4
TACCTT	CGATGT	42326	65	A	9	168	HBsAg	P4
TACCTT	GCCAAT	29668	65	A	9	168	Norm_bc	P4
TAGCTT	ATCACG	796	10	B	2	137	HBeAg	P4
TAGCTT	CGATGT	4571	10	B	2	137	HBsAg	P4
TAGCTT	GCCAAT	2046	10	B	2	137	Norm_bc	P4
TATAAT	ATCACG	718	44	D	6	155	HBeAg	P4
TATAAT	CGATGT	4245	44	D	6	155	HBsAg	P4
TATAAT	GCCAAT	2475	44	D	6	155	Norm_bc	P4
TATATC	ATCACG	2098	53	E	7	164	HBeAg	P4
TATATC	CGATGT	12032	53	E	7	164	HBsAg	P4
TATATC	GCCAAT	9475	53	E	7	164	Norm_bc	P4
TATGCA	ATCACG	8867	75	C	10	170	HBeAg	P4
TATGCA	CGATGT	50767	75	C	10	170	HBsAg	P4
TATGCA	GCCAAT	33321	75	C	10	170	Norm_bc	P4
TATTAT	ATCACG	3131	54	F	7	165	HBeAg	P4
TATTAT	CGATGT	17308	54	F	7	165	HBsAg	P4
TATTAT	GCCAAT	18147	54	F	7	165	Norm_bc	P4
TCATTC	ATCACG	848	45	E	6	156	HBeAg	P4
TCATTC	CGATGT	4916	45	E	6	156	HBsAg	P4
TCATTC	GCCAAT	3512	45	E	6	156	Norm_bc	P4
TCCACA	ATCACG	12610	56	H	7	167	HBeAg	P4
TCCACA	CGATGT	74072	56	H	7	167	HBsAg	P4
TCCACA	GCCAAT	33277	56	H	7	167	Norm_bc	P4
TCCCGA	ATCACG	529	46	F	6	157	HBeAg	P4
TCCCGA	CGATGT	3021	46	F	6	157	HBsAg	P4
TCCCGA	GCCAAT	2009	46	F	6	157	Norm_bc	P4
TCCTGC	ATCACG	8347	58	B	8	161	HBeAg	P4
TCCTGC	CGATGT	48007	58	B	8	161	HBsAg	P4
TCCTGC	GCCAAT	24827	58	B	8	161	Norm_bc	P4
TCGAAG	ATCACG	13154	47	G	6	158	HBeAg	P4
TCGAAG	CGATGT	77426	47	G	6	158	HBsAg	P4
TCGAAG	GCCAAT	36229	47	G	6	158	Norm_bc	P4
TCGGCA	ATCACG	1446	48	H	6	159	HBeAg	P4
TCGGCA	CGATGT	8571	48	H	6	159	HBsAg	P4
TCGGCA	GCCAAT	5403	48	H	6	159	Norm_bc	P4
TGACCA	ATCACG	1702	4	D	1	139	HBeAg	P4
TGACCA	CGATGT	10752	4	D	1	139	HBsAg	P4
TGACCA	GCCAAT	6524	4	D	1	139	Norm_bc	P4
TGCGCT	ATCACG	2090	60	D	8	163	HBeAg	P4
TGCGCT	CGATGT	151898	60	D	8	163	HBsAg	P4
TGCGCT	GCCAAT	3081	60	D	8	163	Norm_bc	P4
TGGAGC	ATCACG	9479	79	G	10	174	HBeAg	P4
TGGAGC	CGATGT	55445	79	G	10	174	HBsAg	P4
TGGAGC	GCCAAT	35833	79	G	10	174	Norm_bc	P4
TTAGGC	ATCACG	16951	3	C	1	138	HBeAg	P4
TTAGGC	CGATGT	97962	3	C	1	138	HBsAg	P4
TTAGGC	GCCAAT	38755	3	C	1	138	Norm_bc	P4
TTCTCG	ATCACG	10515	57	A	8	160	HBeAg	P4
TTCTCG	CGATGT	60185	57	A	8	160	HBsAg	P4
TTCTCG	GCCAAT	31624	57	A	8	160	Norm_bc	P4
TTGCGG	ATCACG	11108	63	G	8	166	HBeAg	P4
TTGCGG	CGATGT	63758	63	G	8	166	HBsAg	P4
TTGCGG	GCCAAT	33594	63	G	8	166	Norm_bc	P4
AACGGA	ATCACG	1290	61	E	8	209	HBeAg	P5
AACGGA	CGATGT	9069	61	E	8	209	HBsAg	P5
AACGGA	GCCAAT	2264	61	E	8	209	Norm_bc	P5
AAGGAG	ATCACG	2973	51	C	7	207	HBeAg	P5
AAGGAG	CGATGT	19963	51	C	7	207	HBsAg	P5
AAGGAG	GCCAAT	4288	51	C	7	207	Norm_bc	P5
AATCGT	ATCACG	786	68	D	9	216	HBeAg	P5
AATCGT	CGATGT	5583	68	D	9	216	HBsAg	P5
AATCGT	GCCAAT	1870	68	D	9	216	Norm_bc	P5
AATTCC	ATCACG	7715	71	G	9	219	HBeAg	P5
AATTCC	CGATGT	48659	71	G	9	219	HBsAg	P5
AATTCC	GCCAAT	15889	71	G	9	219	Norm_bc	P5
ACAGTG	ATCACG	6152	5	E	1	185	HBeAg	P5
ACAGTG	CGATGT	39356	5	E	1	185	HBsAg	P5
ACAGTG	GCCAAT	9650	5	E	1	185	Norm_bc	P5
ACCTTA	ATCACG	406	95	G	12	Negative	HBeAg	P5
ACCTTA	CGATGT	2694	95	G	12	Negative	HBsAg	P5
ACCTTA	GCCAAT	1313	95	G	12	Negative	Norm_bc	P5
ACGAGG	ATCACG	1290	67	C	9	215	HBeAg	P5
ACGAGG	CGATGT	8123	67	C	9	215	HBsAg	P5
ACGAGG	GCCAAT	2711	67	C	9	215	Norm_bc	P5
ACTGAT	ATCACG	12944	25	A	4	189	HBeAg	P5
ACTGAT	CGATGT	79697	25	A	4	189	HBsAg	P5
ACTGAT	GCCAAT	16145	25	A	4	189	Norm_bc	P5
ACTGCT	ATCACG	442	84	D	11	224	HBeAg	P5
ACTGCT	CGATGT	3075	84	D	11	224	HBsAg	P5
ACTGCT	GCCAAT	2143	84	D	11	224	Norm_bc	P5
ACTTGA	ATCACG	11163	8	H	1	188	HBeAg	P5
ACTTGA	CGATGT	70675	8	H	1	188	HBsAg	P5
ACTTGA	GCCAAT	15751	8	H	1	188	Norm_bc	P5
AGACCA	ATCACG	1224	70	F	9	218	HBeAg	P5
AGACCA	CGATGT	7794	70	F	9	218	HBsAg	P5
AGACCA	GCCAAT	3176	70	F	9	218	Norm_bc	P5
AGAGTA	ATCACG	700	92	D	12	224	HBeAg	P5
AGAGTA	CGATGT	5918	92	D	12	224	HBsAg	P5
AGAGTA	GCCAAT	2033	92	D	12	224	Norm_bc	P5
AGATGT	ATCACG	13111	72	H	9	220	HBeAg	P5
AGATGT	CGATGT	80585	72	H	9	220	HBsAg	P5
AGATGT	GCCAAT	19714	72	H	9	220	Norm_bc	P5
AGCACC	ATCACG	7506	55	G	7	211	HBeAg	P5
AGCACC	CGATGT	47171	55	G	7	211	HBsAg	P5
AGCACC	GCCAAT	15361	55	G	7	211	Norm_bc	P5
AGTCAA	ATCACG	5126	13	E	2	185	HBeAg	P5
AGTCAA	CGATGT	32489	13	E	2	185	HBsAg	P5
AGTCAA	GCCAAT	7980	13	E	2	185	Norm_bc	P5
AGTCCA	ATCACG	451	93	E	12	225	HBeAg	P5
AGTCCA	CGATGT	3091	93	E	12	225	HBsAg	P5
AGTCCA	GCCAAT	2436	93	E	12	225	Norm_bc	P5
AGTCTC	ATCACG	911	78	F	10	218	HBeAg	P5
AGTCTC	CGATGT	6407	78	F	10	218	HBsAg	P5
AGTCTC	GCCAAT	3305	78	F	10	218	Norm_bc	P5
AGTTCC	ATCACG	6649	14	F	2	186	HBeAg	P5
AGTTCC	CGATGT	41368	14	F	2	186	HBsAg	P5
AGTTCC	GCCAAT	10644	14	F	2	186	Norm_bc	P5
ATAGAT	ATCACG	1382	74	B	10	214	HBeAg	P5
ATAGAT	CGATGT	8968	74	B	10	214	HBsAg	P5
ATAGAT	GCCAAT	3859	74	B	10	214	Norm_bc	P5
ATCACG	ATCACG	8495	1	A	1	181	HBeAg	P5
ATCACG	CGATGT	53100	1	A	1	181	HBsAg	P5
ATCACG	GCCAAT	12198	1	A	1	181	Norm_bc	P5
ATGAGC	ATCACG	10787	26	B	4	190	HBeAg	P5
ATGAGC	CGATGT	67128	26	B	4	190	HBsAg	P5
ATGAGC	GCCAAT	16034	26	B	4	190	Norm_bc	P5
ATGGCA	ATCACG	3258	50	B	7	206	HBeAg	P5
ATGGCA	CGATGT	20799	50	B	7	206	HBsAg	P5
ATGGCA	GCCAAT	6433	50	B	7	206	Norm_bc	P5
ATGTCA	ATCACG	6155	15	G	2	187	HBeAg	P5
ATGTCA	CGATGT	38235	15	G	2	187	HBsAg	P5
ATGTCA	GCCAAT	9303	15	G	2	187	Norm_bc	P5
ATTCCT	ATCACG	8196	27	C	4	191	HBeAg	P5
ATTCCT	CGATGT	49974	27	C	4	191	HBsAg	P5
ATTCCT	GCCAAT	13992	27	C	4	191	Norm_bc	P5
CAAAAG	ATCACG	3218	28	D	4	192	HBeAg	P5
CAAAAG	CGATGT	20639	28	D	4	192	HBsAg	P5
CAAAAG	GCCAAT	5914	28	D	4	192	Norm_bc	P5
CAACTA	ATCACG	2925	29	E	4	193	HBeAg	P5
CAACTA	CGATGT	18561	29	E	4	193	HBsAg	P5
CAACTA	GCCAAT	5290	29	E	4	193	Norm_bc	P5
CAAGTT	ATCACG	7749	64	H	8	212	HBeAg	P5
CAAGTT	CGATGT	48020	64	H	8	212	HBsAg	P5
CAAGTT	GCCAAT	13419	64	H	8	212	Norm_bc	P5
CACCGG	ATCACG	3225	30	F	4	194	HBeAg	P5
CACCGG	CGATGT	20556	30	F	4	194	HBsAg	P5
CACCGG	GCCAAT	5463	30	F	4	194	Norm_bc	P5
CACGAT	ATCACG	9453	31	G	4	195	HBeAg	P5
CACGAT	CGATGT	58238	31	G	4	195	HBsAg	P5
CACGAT	GCCAAT	12592	31	G	4	195	Norm_bc	P5
CACTCA	ATCACG	7116	32	H	4	196	HBeAg	P5
CACTCA	CGATGT	91863	32	H	4	196	HBsAg	P5
CACTCA	GCCAAT	11469	32	H	4	196	Norm_bc	P5
CAGATC	ATCACG	6932	7	G	1	187	HBeAg	P5
CAGATC	CGATGT	43010	7	G	1	187	HBsAg	P5
CAGATC	GCCAAT	11290	7	G	1	187	Norm_bc	P5
CAGGCC	ATCACG	1163	81	A	11	221	HBeAg	P5
CAGGCC	CGATGT	7602	81	A	11	221	HBsAg	P5
CAGGCC	GCCAAT	3379	81	A	11	221	Norm_bc	P5
CAGGCG	ATCACG	17518	33	A	5	197	HBeAg	P5
CAGGCG	CGATGT	1539879	33	A	5	197	HBsAg	P5
CAGGCG	GCCAAT	15585	33	A	5	197	Norm_bc	P5
CAGTAA	ATCACG	576	82	B	11	222	HBeAg	P5
CAGTAA	CGATGT	4086	82	B	11	222	HBsAg	P5
CAGTAA	GCCAAT	2243	82	B	11	222	Norm_bc	P5
CATGGC	ATCACG	5549	34	B	5	198	HBeAg	P5
CATGGC	CGATGT	33987	34	B	5	198	HBsAg	P5
CATGGC	GCCAAT	11620	34	B	5	198	Norm_bc	P5
CATTTT	ATCACG	4064	35	C	5	199	HBeAg	P5
CATTTT	CGATGT	25925	35	C	5	199	HBsAg	P5
CATTTT	GCCAAT	7052	35	C	5	199	Norm_bc	P5
CCAACA	ATCACG	1853	36	D	5	200	HBeAg	P5
CCAACA	CGATGT	12028	36	D	5	200	HBsAg	P5
CCAACA	GCCAAT	3690	36	D	5	200	Norm_bc	P5
CCGTCC	ATCACG	10680	16	H	2	188	HBeAg	P5
CCGTCC	CGATGT	65862	16	H	2	188	HBsAg	P5
CCGTCC	GCCAAT	14678	16	H	2	188	Norm_bc	P5
CCTATT	ATCACG	289	76	D	10	216	HBeAg	P5
CCTATT	CGATGT	1758	76	D	10	216	HBsAg	P5
CCTATT	GCCAAT	1062	76	D	10	216	Norm_bc	P5
CGATGT	ATCACG	6404	2	B	1	182	HBeAg	P5
CGATGT	CGATGT	40461	2	B	1	182	HBsAg	P5
CGATGT	GCCAAT	9309	2	B	1	182	Norm_bc	P5
CGCCAA	ATCACG	436	96	H	12	Blank	HBeAg	P5
CGCCAA	CGATGT	3174	96	H	12	Blank	HBsAg	P5
CGCCAA	GCCAAT	1510	96	H	12	Blank	Norm_bc	P5
CGCGGC	ATCACG	9202	59	C	8	207	HBeAg	P5
CGCGGC	CGATGT	55932	59	C	8	207	HBsAg	P5
CGCGGC	GCCAAT	12995	59	C	8	207	Norm_bc	P5
CGGAAT	ATCACG	2736	37	E	5	201	HBeAg	P5
CGGAAT	CGATGT	18345	37	E	5	201	HBsAg	P5
CGGAAT	GCCAAT	5028	37	E	5	201	Norm_bc	P5
CGTACG	ATCACG	3714	22	F	3	194	HBeAg	P5
CGTACG	CGATGT	23349	22	F	3	194	HBsAg	P5
CGTACG	GCCAAT	6283	22	F	3	194	Norm_bc	P5
CGTTAG	ATCACG	1295	89	A	12	221	HBeAg	P5
CGTTAG	CGATGT	9253	89	A	12	221	HBsAg	P5
CGTTAG	GCCAAT	4136	89	A	12	221	Norm_bc	P5
CTAAGG	ATCACG	728	85	E	11	225	HBeAg	P5
CTAAGG	CGATGT	6315	85	E	11	225	HBsAg	P5
CTAAGG	GCCAAT	2340	85	E	11	225	Norm_bc	P5
CTAGCT	ATCACG	3486	38	F	5	202	HBeAg	P5
CTAGCT	CGATGT	21846	38	F	5	202	HBsAg	P5
CTAGCT	GCCAAT	6788	38	F	5	202	Norm_bc	P5
CTATAC	ATCACG	8507	39	G	5	203	HBeAg	P5
CTATAC	CGATGT	52751	39	G	5	203	HBsAg	P5
CTATAC	GCCAAT	13348	39	G	5	203	Norm_bc	P5
CTATCT	ATCACG	10153	52	D	7	208	HBeAg	P5
CTATCT	CGATGT	62509	52	D	7	208	HBsAg	P5
CTATCT	GCCAAT	13922	52	D	7	208	Norm_bc	P5
CTCAGA	ATCACG	1962	40	H	5	204	HBeAg	P5
CTCAGA	CGATGT	12051	40	H	5	204	HBsAg	P5
CTCAGA	GCCAAT	4767	40	H	5	204	Norm_bc	P5
CTGCAT	ATCACG	10237	80	H	10	220	HBeAg	P5
CTGCAT	CGATGT	63377	80	H	10	220	HBsAg	P5
CTGCAT	GCCAAT	16274	80	H	10	220	Norm_bc	P5
CTTGTA	ATCACG	4866	12	D	2	184	HBeAg	P5
CTTGTA	CGATGT	31549	12	D	2	184	HBsAg	P5
CTTGTA	GCCAAT	7602	12	D	2	184	Norm_bc	P5
GAATGC	ATCACG	456	91	C	12	223	HBeAg	P5
GAATGC	CGATGT	3402	91	C	12	223	HBsAg	P5
GAATGC	GCCAAT	1448	91	C	12	223	Norm_bc	P5
GACGAC	ATCACG	17019	41	A	6	197	HBeAg	P5
GACGAC	CGATGT	1456888	41	A	6	197	HBsAg	P5
GACGAC	GCCAAT	15899	41	A	6	197	Norm_bc	P5
GACGAT	ATCACG	890	62	F	8	210	HBeAg	P5
GACGAT	CGATGT	6598	62	F	8	210	HBsAg	P5
GACGAT	GCCAAT	2206	62	F	8	210	Norm_bc	P5
GAGCGC	ATCACG	1789	66	B	9	214	HBeAg	P5
GAGCGC	CGATGT	12218	66	B	9	214	HBsAg	P5
GAGCGC	GCCAAT	4537	66	B	9	214	Norm_bc	P5
GAGTCT	ATCACG	1155	69	E	9	217	HBeAg	P5
GAGTCT	CGATGT	7457	69	E	9	217	HBsAg	P5
GAGTCT	GCCAAT	4029	69	E	9	217	Norm_bc	P5
GAGTGG	ATCACG	4720	23	G	3	195	HBeAg	P5
GAGTGG	CGATGT	31053	23	G	3	195	HBsAg	P5
GAGTGG	GCCAAT	8060	23	G	3	195	Norm_bc	P5
GATCAG	ATCACG	7050	9	A	2	181	HBeAg	P5
GATCAG	CGATGT	45187	9	A	2	181	HBsAg	P5
GATCAG	GCCAAT	11294	9	A	2	181	Norm_bc	P5
GCCAAT	ATCACG	5208	6	F	1	186	HBeAg	P5
GCCAAT	CGATGT	32536	6	F	1	186	HBsAg	P5
GCCAAT	GCCAAT	8542	6	F	1	186	Norm_bc	P5
GGAGAA	ATCACG	9911	73	A	10	213	HBeAg	P5
GGAGAA	CGATGT	62521	73	A	10	213	HBsAg	P5
GGAGAA	GCCAAT	17977	73	A	10	213	Norm_bc	P5
GGCTAC	ATCACG	4568	11	C	2	183	HBeAg	P5
GGCTAC	CGATGT	29714	11	C	2	183	HBsAg	P5
GGCTAC	GCCAAT	7225	11	C	2	183	Norm_bc	P5
GGTAGC	ATCACG	5857	24	H	3	196	HBeAg	P5
GGTAGC	CGATGT	78816	24	H	3	196	HBsAg	P5
GGTAGC	GCCAAT	9400	24	H	3	196	Norm_bc	P5
GTACTT	ATCACG	12292	49	A	7	205	HBeAg	P5
GTACTT	CGATGT	74964	49	A	7	205	HBsAg	P5
GTACTT	GCCAAT	16161	49	A	7	205	Norm_bc	P5
GTAGAG	ATCACG	13125	17	A	3	189	HBeAg	P5
GTAGAG	CGATGT	83383	17	A	3	189	HBsAg	P5
GTAGAG	GCCAAT	16541	17	A	3	189	Norm_bc	P5
GTCCGC	ATCACG	10812	18	B	3	190	HBeAg	P5
GTCCGC	CGATGT	67133	18	B	3	190	HBsAg	P5
GTCCGC	GCCAAT	15579	18	B	3	190	Norm_bc	P5
GTGAAA	ATCACG	10631	19	C	3	191	HBeAg	P5
GTGAAA	CGATGT	65994	19	C	3	191	HBsAg	P5
GTGAAA	GCCAAT	14792	19	C	3	191	Norm_bc	P5
GTGAGA	ATCACG	4604	87	G	11	Negative	HBeAg	P5
GTGAGA	CGATGT	29095	87	G	11	Negative	HBsAg	P5
GTGAGA	GCCAAT	16543	87	G	11	Negative	Norm_bc	P5
GTGGCC	ATCACG	4971	20	D	3	192	HBeAg	P5
GTGGCC	CGATGT	32082	20	D	3	192	HBsAg	P5
GTGGCC	GCCAAT	7916	20	D	3	192	Norm_bc	P5
GTGTAT	ATCACG	595	90	B	12	222	HBeAg	P5
GTGTAT	CGATGT	4869	90	B	12	222	HBsAg	P5
GTGTAT	GCCAAT	1548	90	B	12	222	Norm_bc	P5
GTTACC	ATCACG	372	83	C	11	223	HBeAg	P5
GTTACC	CGATGT	3120	83	C	11	223	HBsAg	P5
GTTACC	GCCAAT	1483	83	C	11	223	Norm_bc	P5
GTTTCG	ATCACG	8847	21	E	3	193	HBeAg	P5
GTTTCG	CGATGT	54783	21	E	3	193	HBsAg	P5
GTTTCG	GCCAAT	12079	21	E	3	193	Norm_bc	P5
TAACCG	ATCACG	608	77	E	10	217	HBeAg	P5
TAACCG	CGATGT	4395	77	E	10	217	HBsAg	P5
TAACCG	GCCAAT	2334	77	E	10	217	Norm_bc	P5
TAAGAC	ATCACG	7772	88	H	11	Blank	HBeAg	P5
TAAGAC	CGATGT	48309	88	H	11	Blank	HBsAg	P5
TAAGAC	GCCAAT	17434	88	H	11	Blank	Norm_bc	P5
TAATCG	ATCACG	10898	42	B	6	198	HBeAg	P5
TAATCG	CGATGT	69142	42	B	6	198	HBsAg	P5
TAATCG	GCCAAT	16442	42	B	6	198	Norm_bc	P5
TACAGC	ATCACG	2444	43	C	6	199	HBeAg	P5
TACAGC	CGATGT	14570	43	C	6	199	HBsAg	P5
TACAGC	GCCAAT	3999	43	C	6	199	Norm_bc	P5
TACCTT	ATCACG	12599	65	A	9	213	HBeAg	P5
TACCTT	CGATGT	77050	65	A	9	213	HBsAg	P5
TACCTT	GCCAAT	18689	65	A	9	213	Norm_bc	P5
TAGCTT	ATCACG	6224	10	B	2	182	HBeAg	P5
TAGCTT	CGATGT	39891	10	B	2	182	HBsAg	P5
TAGCTT	GCCAAT	8895	10	B	2	182	Norm_bc	P5
TATAAT	ATCACG	1528	44	D	6	200	HBeAg	P5
TATAAT	CGATGT	9820	44	D	6	200	HBsAg	P5
TATAAT	GCCAAT	2862	44	D	6	200	Norm_bc	P5
TATATC	ATCACG	10046	53	E	7	209	HBeAg	P5
TATATC	CGATGT	64340	53	E	7	209	HBsAg	P5
TATATC	GCCAAT	12527	53	E	7	209	Norm_bc	P5
TATGCA	ATCACG	901	75	C	10	215	HBeAg	P5
TATGCA	CGATGT	5597	75	C	10	215	HBsAg	P5
TATGCA	GCCAAT	2454	75	C	10	215	Norm_bc	P5
TATTAT	ATCACG	4968	54	F	7	210	HBeAg	P5
TATTAT	CGATGT	30317	54	F	7	210	HBsAg	P5
TATTAT	GCCAAT	13748	54	F	7	210	Norm_bc	P5
TCATTC	ATCACG	2532	45	E	6	201	HBeAg	P5
TCATTC	CGATGT	15433	45	E	6	201	HBsAg	P5
TCATTC	GCCAAT	4213	45	E	6	201	Norm_bc	P5
TCCACA	ATCACG	12504	56	H	7	212	HBeAg	P5
TCCACA	CGATGT	76543	56	H	7	212	HBsAg	P5
TCCACA	GCCAAT	17315	56	H	7	212	Norm_bc	P5
TCCCGA	ATCACG	1772	46	F	6	202	HBeAg	P5
TCCCGA	CGATGT	11504	46	F	6	202	HBsAg	P5
TCCCGA	GCCAAT	3208	46	F	6	202	Norm_bc	P5
TCCTGC	ATCACG	2511	58	B	8	206	HBeAg	P5
TCCTGC	CGATGT	15806	58	B	8	206	HBsAg	P5
TCCTGC	GCCAAT	5834	58	B	8	206	Norm_bc	P5
TCGAAG	ATCACG	10980	47	G	6	203	HBeAg	P5
TCGAAG	CGATGT	68652	47	G	6	203	HBsAg	P5
TCGAAG	GCCAAT	18191	47	G	6	203	Norm_bc	P5
TCGGCA	ATCACG	12587	48	H	6	204	HBeAg	P5
TCGGCA	CGATGT	78750	48	H	6	204	HBsAg	P5
TCGGCA	GCCAAT	18545	48	H	6	204	Norm_bc	P5
TGACCA	ATCACG	6605	4	D	1	184	HBeAg	P5
TGACCA	CGATGT	41678	4	D	1	184	HBsAg	P5
TGACCA	GCCAAT	10209	4	D	1	184	Norm_bc	P5
TGCGCT	ATCACG	2387	60	D	8	208	HBeAg	P5
TGCGCT	CGATGT	15698	60	D	8	208	HBsAg	P5
TGCGCT	GCCAAT	4365	60	D	8	208	Norm_bc	P5
TGGAGC	ATCACG	4214	79	G	10	219	HBeAg	P5
TGGAGC	CGATGT	26348	79	G	10	219	HBsAg	P5
TGGAGC	GCCAAT	13631	79	G	10	219	Norm_bc	P5
TTAGGC	ATCACG	7546	3	C	1	183	HBeAg	P5
TTAGGC	CGATGT	47877	3	C	1	183	HBsAg	P5
TTAGGC	GCCAAT	12147	3	C	1	183	Norm_bc	P5
TTCTCG	ATCACG	10427	57	A	8	205	HBeAg	P5
TTCTCG	CGATGT	64416	57	A	8	205	HBsAg	P5
TTCTCG	GCCAAT	17508	57	A	8	205	Norm_bc	P5
TTGCGG	ATCACG	10014	63	G	8	211	HBeAg	P5
TTGCGG	CGATGT	63836	63	G	8	211	HBsAg	P5
TTGCGG	GCCAAT	19248	63	G	8	211	Norm_bc	P5
AACGGA	ATCACG	2761	61	E	8	254	HBeAg	P6
AACGGA	CGATGT	16640	61	E	8	254	HBsAg	P6
AACGGA	GCCAAT	5603	61	E	8	254	Norm_bc	P6
AAGGAG	ATCACG	23579	51	C	7	252	HBeAg	P6
AAGGAG	CGATGT	139636	51	C	7	252	HBsAg	P6
AAGGAG	GCCAAT	27480	51	C	7	252	Norm_bc	P6
AATCGT	ATCACG	2127	68	D	9	261	HBeAg	P6
AATCGT	CGATGT	12742	68	D	9	261	HBsAg	P6
AATCGT	GCCAAT	4432	68	D	9	261	Norm_bc	P6
AATTCC	ATCACG	9830	71	G	9	264	HBeAg	P6
AATTCC	CGATGT	59107	71	G	9	264	HBsAg	P6
AATTCC	GCCAAT	19131	71	G	9	264	Norm_bc	P6
ACAGTG	ATCACG	8040	5	E	1	230	HBeAg	P6
ACAGTG	CGATGT	48948	5	E	1	230	HBsAg	P6
ACAGTG	GCCAAT	13859	5	E	1	230	Norm_bc	P6
ACCTTA	ATCACG	938	95	G	12	Negative	HBeAg	P6
ACCTTA	CGATGT	5556	95	G	12	Negative	HBsAg	P6
ACCTTA	GCCAAT	2658	95	G	12	Negative	Norm_bc	P6
ACGAGG	ATCACG	21226	67	C	9	260	HBeAg	P6
ACGAGG	CGATGT	127699	67	C	9	260	HBsAg	P6
ACGAGG	GCCAAT	29212	67	C	9	260	Norm_bc	P6
ACTGAT	ATCACG	19812	25	A	4	234	HBeAg	P6
ACTGAT	CGATGT	120448	25	A	4	234	HBsAg	P6
ACTGAT	GCCAAT	27431	25	A	4	234	Norm_bc	P6
ACTGCT	ATCACG	600	84	D	11	269	HBeAg	P6
ACTGCT	CGATGT	3437	84	D	11	269	HBsAg	P6
ACTGCT	GCCAAT	2426	84	D	11	269	Norm_bc	P6
ACTTGA	ATCACG	14660	8	H	1	233	HBeAg	P6
ACTTGA	CGATGT	89375	8	H	1	233	HBsAg	P6
ACTTGA	GCCAAT	21148	8	H	1	233	Norm_bc	P6
AGACCA	ATCACG	3183	70	F	9	263	HBeAg	P6
AGACCA	CGATGT	18732	70	F	9	263	HBsAg	P6
AGACCA	GCCAAT	7156	70	F	9	263	Norm_bc	P6
AGAGTA	ATCACG	1080	92	D	12	269	HBeAg	P6
AGAGTA	CGATGT	6157	92	D	12	269	HBsAg	P6
AGAGTA	GCCAAT	3010	92	D	12	269	Norm_bc	P6
AGATGT	ATCACG	17545	72	H	9	265	HBeAg	P6
AGATGT	CGATGT	107244	72	H	9	265	HBsAg	P6
AGATGT	GCCAAT	27591	72	H	9	265	Norm_bc	P6
AGCACC	ATCACG	16414	55	G	7	256	HBeAg	P6
AGCACC	CGATGT	101077	55	G	7	256	HBsAg	P6
AGCACC	GCCAAT	25952	55	G	7	256	Norm_bc	P6
AGTCAA	ATCACG	7342	13	E	2	230	HBeAg	P6
AGTCAA	CGATGT	44741	13	E	2	230	HBsAg	P6
AGTCAA	GCCAAT	11812	13	E	2	230	Norm_bc	P6
AGTCCA	ATCACG	630	93	E	12	270	HBeAg	P6
AGTCCA	CGATGT	3614	93	E	12	270	HBsAg	P6
AGTCCA	GCCAAT	2085	93	E	12	270	Norm_bc	P6
AGTCTC	ATCACG	1216	78	F	10	263	HBeAg	P6
AGTCTC	CGATGT	7271	78	F	10	263	HBsAg	P6
AGTCTC	GCCAAT	3988	78	F	10	263	Norm_bc	P6
AGTTCC	ATCACG	11665	14	F	2	231	HBeAg	P6
AGTTCC	CGATGT	70121	14	F	2	231	HBsAg	P6
AGTTCC	GCCAAT	18715	14	F	2	231	Norm_bc	P6
ATAGAT	ATCACG	1324	74	B	10	259	HBeAg	P6
ATAGAT	CGATGT	7683	74	B	10	259	HBsAg	P6
ATAGAT	GCCAAT	3613	74	B	10	259	Norm_bc	P6
ATCACG	ATCACG	8840	1	A	1	226	HBeAg	P6
ATCACG	CGATGT	53831	1	A	1	226	HBsAg	P6
ATCACG	GCCAAT	14873	1	A	1	226	Norm_bc	P6
ATGAGC	ATCACG	6098	26	B	4	235	HBeAg	P6
ATGAGC	CGATGT	36017	26	B	4	235	HBsAg	P6
ATGAGC	GCCAAT	8928	26	B	4	235	Norm_bc	P6
ATGGCA	ATCACG	21920	50	B	7	251	HBeAg	P6
ATGGCA	CGATGT	132523	50	B	7	251	HBsAg	P6
ATGGCA	GCCAAT	24919	50	B	7	251	Norm_bc	P6
ATGTCA	ATCACG	13538	15	G	2	232	HBeAg	P6
ATGTCA	CGATGT	80014	15	G	2	232	HBsAg	P6
ATGTCA	GCCAAT	18696	15	G	2	232	Norm_bc	P6
ATTCCT	ATCACG	3270	27	C	4	236	HBeAg	P6
ATTCCT	CGATGT	19712	27	C	4	236	HBsAg	P6
ATTCCT	GCCAAT	5868	27	C	4	236	Norm_bc	P6
CAAAAG	ATCACG	7763	28	D	4	237	HBeAg	P6
CAAAAG	CGATGT	46858	28	D	4	237	HBsAg	P6
CAAAAG	GCCAAT	13828	28	D	4	237	Norm_bc	P6
CAACTA	ATCACG	9309	29	E	4	238	HBeAg	P6
CAACTA	CGATGT	56892	29	E	4	238	HBsAg	P6
CAACTA	GCCAAT	17157	29	E	4	238	Norm_bc	P6
CAAGTT	ATCACG	2997	64	H	8	257	HBeAg	P6
CAAGTT	CGATGT	17848	64	H	8	257	HBsAg	P6
CAAGTT	GCCAAT	4460	64	H	8	257	Norm_bc	P6
CACCGG	ATCACG	4905	30	F	4	239	HBeAg	P6
CACCGG	CGATGT	30201	30	F	4	239	HBsAg	P6
CACCGG	GCCAAT	7535	30	F	4	239	Norm_bc	P6
CACGAT	ATCACG	6254	31	G	4	240	HBeAg	P6
CACGAT	CGATGT	36781	31	G	4	240	HBsAg	P6
CACGAT	GCCAAT	9766	31	G	4	240	Norm_bc	P6
CACTCA	ATCACG	16203	32	H	4	241	HBeAg	P6
CACTCA	CGATGT	98249	32	H	4	241	HBsAg	P6
CACTCA	GCCAAT	19970	32	H	4	241	Norm_bc	P6
CAGATC	ATCACG	11622	7	G	1	232	HBeAg	P6
CAGATC	CGATGT	68161	7	G	1	232	HBsAg	P6
CAGATC	GCCAAT	16452	7	G	1	232	Norm_bc	P6
CAGGCC	ATCACG	2089	81	A	11	266	HBeAg	P6
CAGGCC	CGATGT	12118	81	A	11	266	HBsAg	P6
CAGGCC	GCCAAT	4396	81	A	11	266	Norm_bc	P6
CAGGCG	ATCACG	6830	33	A	5	242	HBeAg	P6
CAGGCG	CGATGT	41027	33	A	5	242	HBsAg	P6
CAGGCG	GCCAAT	10132	33	A	5	242	Norm_bc	P6
CAGTAA	ATCACG	1527	82	B	11	267	HBeAg	P6
CAGTAA	CGATGT	142924	82	B	11	267	HBsAg	P6
CAGTAA	GCCAAT	3215	82	B	11	267	Norm_bc	P6
CATGGC	ATCACG	5070	34	B	5	243	HBeAg	P6
CATGGC	CGATGT	29837	34	B	5	243	HBsAg	P6
CATGGC	GCCAAT	7169	34	B	5	243	Norm_bc	P6
CATTTT	ATCACG	9113	35	C	5	244	HBeAg	P6
CATTTT	CGATGT	55516	35	C	5	244	HBsAg	P6
CATTTT	GCCAAT	16025	35	C	5	244	Norm_bc	P6
CCAACA	ATCACG	4049	36	D	5	245	HBeAg	P6
CCAACA	CGATGT	24118	36	D	5	245	HBsAg	P6
CCAACA	GCCAAT	6583	36	D	5	245	Norm_bc	P6
CCGTCC	ATCACG	17147	16	H	2	233	HBeAg	P6
CCGTCC	CGATGT	104219	16	H	2	233	HBsAg	P6
CCGTCC	GCCAAT	21476	16	H	2	233	Norm_bc	P6
CCTATT	ATCACG	570	76	D	10	261	HBeAg	P6
CCTATT	CGATGT	3118	76	D	10	261	HBsAg	P6
CCTATT	GCCAAT	2165	76	D	10	261	Norm_bc	P6
CGATGT	ATCACG	8796	2	B	1	227	HBeAg	P6
CGATGT	CGATGT	78219	2	B	1	227	HBsAg	P6
CGATGT	GCCAAT	14421	2	B	1	227	Norm_bc	P6
CGCCAA	ATCACG	1646	96	H	12	Blank	HBeAg	P6
CGCCAA	CGATGT	10147	96	H	12	Blank	HBsAg	P6
CGCCAA	GCCAAT	4982	96	H	12	Blank	Norm_bc	P6
CGCGGC	ATCACG	12415	59	C	8	252	HBeAg	P6
CGCGGC	CGATGT	74940	59	C	8	252	HBsAg	P6
CGCGGC	GCCAAT	17101	59	C	8	252	Norm_bc	P6
CGGAAT	ATCACG	7635	37	E	5	246	HBeAg	P6
CGGAAT	CGATGT	44864	37	E	5	246	HBsAg	P6
CGGAAT	GCCAAT	13956	37	E	5	246	Norm_bc	P6
CGTACG	ATCACG	6833	22	F	3	239	HBeAg	P6
CGTACG	CGATGT	42412	22	F	3	239	HBsAg	P6
CGTACG	GCCAAT	10679	22	F	3	239	Norm_bc	P6
CGTTAG	ATCACG	2694	89	A	12	266	HBeAg	P6
CGTTAG	CGATGT	16460	89	A	12	266	HBsAg	P6
CGTTAG	GCCAAT	6478	89	A	12	266	Norm_bc	P6
CTAAGG	ATCACG	1207	85	E	11	270	HBeAg	P6
CTAAGG	CGATGT	6934	85	E	11	270	HBsAg	P6
CTAAGG	GCCAAT	2849	85	E	11	270	Norm_bc	P6
CTAGCT	ATCACG	9751	38	F	5	247	HBeAg	P6
CTAGCT	CGATGT	58605	38	F	5	247	HBsAg	P6
CTAGCT	GCCAAT	18736	38	F	5	247	Norm_bc	P6
CTATAC	ATCACG	3618	39	G	5	248	HBeAg	P6
CTATAC	CGATGT	22145	39	G	5	248	HBsAg	P6
CTATAC	GCCAAT	5991	39	G	5	248	Norm_bc	P6
CTATCT	ATCACG	3682	52	D	7	253	HBeAg	P6
CTATCT	CGATGT	22121	52	D	7	253	HBsAg	P6
CTATCT	GCCAAT	5678	52	D	7	253	Norm_bc	P6
CTCAGA	ATCACG	16868	40	H	5	249	HBeAg	P6
CTCAGA	CGATGT	100102	40	H	5	249	HBsAg	P6
CTCAGA	GCCAAT	20229	40	H	5	249	Norm_bc	P6
CTGCAT	ATCACG	13815	80	H	10	265	HBeAg	P6
CTGCAT	CGATGT	83986	80	H	10	265	HBsAg	P6
CTGCAT	GCCAAT	24398	80	H	10	265	Norm_bc	P6
CTTGTA	ATCACG	5801	12	D	2	229	HBeAg	P6
CTTGTA	CGATGT	34413	12	D	2	229	HBsAg	P6
CTTGTA	GCCAAT	8866	12	D	2	229	Norm_bc	P6
GAATGC	ATCACG	743	91	C	12	268	HBeAg	P6
GAATGC	CGATGT	4204	91	C	12	268	HBsAg	P6
GAATGC	GCCAAT	2568	91	C	12	268	Norm_bc	P6
GACGAC	ATCACG	12075	41	A	6	242	HBeAg	P6
GACGAC	CGATGT	71032	41	A	6	242	HBsAg	P6
GACGAC	GCCAAT	20916	41	A	6	242	Norm_bc	P6
GACGAT	ATCACG	5350	62	F	8	255	HBeAg	P6
GACGAT	CGATGT	31997	62	F	8	255	HBsAg	P6
GACGAT	GCCAAT	11575	62	F	8	255	Norm_bc	P6
GAGCGC	ATCACG	3429	66	B	9	259	HBeAg	P6
GAGCGC	CGATGT	20120	66	B	9	259	HBsAg	P6
GAGCGC	GCCAAT	6367	66	B	9	259	Norm_bc	P6
GAGTCT	ATCACG	3436	69	E	9	262	HBeAg	P6
GAGTCT	CGATGT	19402	69	E	9	262	HBsAg	P6
GAGTCT	GCCAAT	7525	69	E	9	262	Norm_bc	P6
GAGTGG	ATCACG	10755	23	G	3	240	HBeAg	P6
GAGTGG	CGATGT	63000	23	G	3	240	HBsAg	P6
GAGTGG	GCCAAT	18029	23	G	3	240	Norm_bc	P6
GATCAG	ATCACG	21995	9	A	2	226	HBeAg	P6
GATCAG	CGATGT	134034	9	A	2	226	HBsAg	P6
GATCAG	GCCAAT	28732	9	A	2	226	Norm_bc	P6
GCCAAT	ATCACG	10387	6	F	1	231	HBeAg	P6
GCCAAT	CGATGT	62027	6	F	1	231	HBsAg	P6
GCCAAT	GCCAAT	15542	6	F	1	231	Norm_bc	P6
GGAGAA	ATCACG	3084	73	A	10	258	HBeAg	P6
GGAGAA	CGATGT	21371	73	A	10	258	HBsAg	P6
GGAGAA	GCCAAT	6310	73	A	10	258	Norm_bc	P6
GGCTAC	ATCACG	9431	11	C	2	228	HBeAg	P6
GGCTAC	CGATGT	56077	11	C	2	228	HBsAg	P6
GGCTAC	GCCAAT	14038	11	C	2	228	Norm_bc	P6
GGTAGC	ATCACG	19428	24	H	3	241	HBeAg	P6
GGTAGC	CGATGT	118103	24	H	3	241	HBsAg	P6
GGTAGC	GCCAAT	23729	24	H	3	241	Norm_bc	P6
GTACTT	ATCACG	3380	49	A	7	250	HBeAg	P6
GTACTT	CGATGT	19726	49	A	7	250	HBsAg	P6
GTACTT	GCCAAT	5382	49	A	7	250	Norm_bc	P6
GTAGAG	ATCACG	19160	17	A	3	234	HBeAg	P6
GTAGAG	CGATGT	114948	17	A	3	234	HBsAg	P6
GTAGAG	GCCAAT	25269	17	A	3	234	Norm_bc	P6
GTCCGC	ATCACG	14191	18	B	3	235	HBeAg	P6
GTCCGC	CGATGT	86088	18	B	3	235	HBsAg	P6
GTCCGC	GCCAAT	24278	18	B	3	235	Norm_bc	P6
GTGAAA	ATCACG	10513	19	C	3	236	HBeAg	P6
GTGAAA	CGATGT	63500	19	C	3	236	HBsAg	P6
GTGAAA	GCCAAT	19088	19	C	3	236	Norm_bc	P6
GTGAGA	ATCACG	2708	87	G	11	Negative	HBeAg	P6
GTGAGA	CGATGT	15417	87	G	11	Negative	HBsAg	P6
GTGAGA	GCCAAT	6223	87	G	11	Negative	Norm_bc	P6
GTGGCC	ATCACG	16916	20	D	3	237	HBeAg	P6
GTGGCC	CGATGT	104123	20	D	3	237	HBsAg	P6
GTGGCC	GCCAAT	27006	20	D	3	237	Norm_bc	P6
GTGTAT	ATCACG	1666	90	B	12	267	HBeAg	P6
GTGTAT	CGATGT	118570	90	B	12	267	HBsAg	P6
GTGTAT	GCCAAT	3232	90	B	12	267	Norm_bc	P6
GTTACC	ATCACG	872	83	C	11	268	HBeAg	P6
GTTACC	CGATGT	4800	83	C	11	268	HBsAg	P6
GTTACC	GCCAAT	3389	83	C	11	268	Norm_bc	P6
GTTTCG	ATCACG	15377	21	E	3	238	HBeAg	P6
GTTTCG	CGATGT	93248	21	E	3	238	HBsAg	P6
GTTTCG	GCCAAT	20146	21	E	3	238	Norm_bc	P6
TAACCG	ATCACG	1444	77	E	10	262	HBeAg	P6
TAACCG	CGATGT	8468	77	E	10	262	HBsAg	P6
TAACCG	GCCAAT	5261	77	E	10	262	Norm_bc	P6
TAAGAC	ATCACG	3110	88	H	11	Blank	HBeAg	P6
TAAGAC	CGATGT	18217	88	H	11	Blank	HBsAg	P6
TAAGAC	GCCAAT	6596	88	H	11	Blank	Norm_bc	P6
TAATCG	ATCACG	10629	42	B	6	243	HBeAg	P6
TAATCG	CGATGT	62673	42	B	6	243	HBsAg	P6
TAATCG	GCCAAT	17025	42	B	6	243	Norm_bc	P6
TACAGC	ATCACG	3867	43	C	6	244	HBeAg	P6
TACAGC	CGATGT	23226	43	C	6	244	HBsAg	P6
TACAGC	GCCAAT	6074	43	C	6	244	Norm_bc	P6
TACCTT	ATCACG	4000	65	A	9	258	HBeAg	P6
TACCTT	CGATGT	24619	65	A	9	258	HBsAg	P6
TACCTT	GCCAAT	6681	65	A	9	258	Norm_bc	P6
TAGCTT	ATCACG	19061	10	B	2	227	HBeAg	P6
TAGCTT	CGATGT	170636	10	B	2	227	HBsAg	P6
TAGCTT	GCCAAT	22084	10	B	2	227	Norm_bc	P6
TATAAT	ATCACG	3878	44	D	6	245	HBeAg	P6
TATAAT	CGATGT	23528	44	D	6	245	HBsAg	P6
TATAAT	GCCAAT	5404	44	D	6	245	Norm_bc	P6
TATATC	ATCACG	3803	53	E	7	254	HBeAg	P6
TATATC	CGATGT	23035	53	E	7	254	HBsAg	P6
TATATC	GCCAAT	6347	53	E	7	254	Norm_bc	P6
TATGCA	ATCACG	1237	75	C	10	260	HBeAg	P6
TATGCA	CGATGT	7328	75	C	10	260	HBsAg	P6
TATGCA	GCCAAT	3628	75	C	10	260	Norm_bc	P6
TATTAT	ATCACG	9591	54	F	7	255	HBeAg	P6
TATTAT	CGATGT	57865	54	F	7	255	HBsAg	P6
TATTAT	GCCAAT	17727	54	F	7	255	Norm_bc	P6
TCATTC	ATCACG	6681	45	E	6	246	HBeAg	P6
TCATTC	CGATGT	40598	45	E	6	246	HBsAg	P6
TCATTC	GCCAAT	14563	45	E	6	246	Norm_bc	P6
TCCACA	ATCACG	16170	56	H	7	257	HBeAg	P6
TCCACA	CGATGT	97815	56	H	7	257	HBsAg	P6
TCCACA	GCCAAT	19957	56	H	7	257	Norm_bc	P6
TCCCGA	ATCACG	8476	46	F	6	247	HBeAg	P6
TCCCGA	CGATGT	49681	46	F	6	247	HBsAg	P6
TCCCGA	GCCAAT	16150	46	F	6	247	Norm_bc	P6
TCCTGC	ATCACG	15647	58	B	8	251	HBeAg	P6
TCCTGC	CGATGT	92977	58	B	8	251	HBsAg	P6
TCCTGC	GCCAAT	19808	58	B	8	251	Norm_bc	P6
TCGAAG	ATCACG	17437	47	G	6	248	HBeAg	P6
TCGAAG	CGATGT	104294	47	G	6	248	HBsAg	P6
TCGAAG	GCCAAT	24131	47	G	6	248	Norm_bc	P6
TCGGCA	ATCACG	13115	48	H	6	249	HBeAg	P6
TCGGCA	CGATGT	80081	48	H	6	249	HBsAg	P6
TCGGCA	GCCAAT	21085	48	H	6	249	Norm_bc	P6
TGACCA	ATCACG	9982	4	D	1	229	HBeAg	P6
TGACCA	CGATGT	60341	4	D	1	229	HBsAg	P6
TGACCA	GCCAAT	16162	4	D	1	229	Norm_bc	P6
TGCGCT	ATCACG	8154	60	D	8	253	HBeAg	P6
TGCGCT	CGATGT	47345	60	D	8	253	HBsAg	P6
TGCGCT	GCCAAT	14668	60	D	8	253	Norm_bc	P6
TGGAGC	ATCACG	4023	79	G	10	264	HBeAg	P6
TGGAGC	CGATGT	23797	79	G	10	264	HBsAg	P6
TGGAGC	GCCAAT	10061	79	G	10	264	Norm_bc	P6
TTAGGC	ATCACG	8368	3	C	1	228	HBeAg	P6
TTAGGC	CGATGT	50027	3	C	1	228	HBsAg	P6
TTAGGC	GCCAAT	13421	3	C	1	228	Norm_bc	P6
TTCTCG	ATCACG	5977	57	A	8	250	HBeAg	P6
TTCTCG	CGATGT	35356	57	A	8	250	HBsAg	P6
TTCTCG	GCCAAT	10216	57	A	8	250	Norm_bc	P6
TTGCGG	ATCACG	12292	63	G	8	256	HBeAg	P6
TTGCGG	CGATGT	72428	63	G	8	256	HBsAg	P6
TTGCGG	GCCAAT	19412	63	G	8	256	Norm_bc	P6
AACGGA	ATCACG	2373	61	E	8	299	HBeAg	P7
AACGGA	CGATGT	14097	61	E	8	299	HBsAg	P7
AACGGA	GCCAAT	3847	61	E	8	299	Norm_bc	P7
AAGGAG	ATCACG	15983	51	C	7	297	HBeAg	P7
AAGGAG	CGATGT	96492	51	C	7	297	HBsAg	P7
AAGGAG	GCCAAT	19900	51	C	7	297	Norm_bc	P7
AATCGT	ATCACG	1778	68	D	9	306	HBeAg	P7
AATCGT	CGATGT	10224	68	D	9	306	HBsAg	P7
AATCGT	GCCAAT	3640	68	D	9	306	Norm_bc	P7
AATTCC	ATCACG	13564	71	G	9	309	HBeAg	P7
AATTCC	CGATGT	82127	71	G	9	309	HBsAg	P7
AATTCC	GCCAAT	21887	71	G	9	309	Norm_bc	P7
ACAGTG	ATCACG	5475	5	E	1	275	HBeAg	P7
ACAGTG	CGATGT	32807	5	E	1	275	HBsAg	P7
ACAGTG	GCCAAT	8461	5	E	1	275	Norm_bc	P7
ACCTTA	ATCACG	610	95	G	12	Negative	HBeAg	P7
ACCTTA	CGATGT	3640	95	G	12	Negative	HBsAg	P7
ACCTTA	GCCAAT	2217	95	G	12	Negative	Norm_bc	P7
ACGAGG	ATCACG	2782	67	C	9	305	HBeAg	P7
ACGAGG	CGATGT	16227	67	C	9	305	HBsAg	P7
ACGAGG	GCCAAT	5267	67	C	9	305	Norm_bc	P7
ACTGAT	ATCACG	16557	25	A	4	279	HBeAg	P7
ACTGAT	CGATGT	99234	25	A	4	279	HBsAg	P7
ACTGAT	GCCAAT	18844	25	A	4	279	Norm_bc	P7
ACTGCT	ATCACG	1044	84	D	11	314	HBeAg	P7
ACTGCT	CGATGT	6356	84	D	11	314	HBsAg	P7
ACTGCT	GCCAAT	3790	84	D	11	314	Norm_bc	P7
ACTTGA	ATCACG	18290	8	H	1	278	HBeAg	P7
ACTTGA	CGATGT	111412	8	H	1	278	HBsAg	P7
ACTTGA	GCCAAT	21700	8	H	1	278	Norm_bc	P7
AGACCA	ATCACG	1384	70	F	9	308	HBeAg	P7
AGACCA	CGATGT	8152	70	F	9	308	HBsAg	P7
AGACCA	GCCAAT	2480	70	F	9	308	Norm_bc	P7
AGAGTA	ATCACG	1793	92	D	12	314	HBeAg	P7
AGAGTA	CGATGT	9319	92	D	12	314	HBsAg	P7
AGAGTA	GCCAAT	5050	92	D	12	314	Norm_bc	P7
AGATGT	ATCACG	17902	72	H	9	310	HBeAg	P7
AGATGT	CGATGT	104729	72	H	9	310	HBsAg	P7
AGATGT	GCCAAT	24174	72	H	9	310	Norm_bc	P7
AGCACC	ATCACG	14384	55	G	7	301	HBeAg	P7
AGCACC	CGATGT	85858	55	G	7	301	HBsAg	P7
AGCACC	GCCAAT	18151	55	G	7	301	Norm_bc	P7
AGTCAA	ATCACG	4624	13	E	2	275	HBeAg	P7
AGTCAA	CGATGT	27758	13	E	2	275	HBsAg	P7
AGTCAA	GCCAAT	7813	13	E	2	275	Norm_bc	P7
AGTCCA	ATCACG	1248	93	E	12	315	HBeAg	P7
AGTCCA	CGATGT	7288	93	E	12	315	HBsAg	P7
AGTCCA	GCCAAT	4369	93	E	12	315	Norm_bc	P7
AGTCTC	ATCACG	3393	78	F	10	308	HBeAg	P7
AGTCTC	CGATGT	19553	78	F	10	308	HBsAg	P7
AGTCTC	GCCAAT	10891	78	F	10	308	Norm_bc	P7
AGTTCC	ATCACG	8203	14	F	2	276	HBeAg	P7
AGTTCC	CGATGT	48286	14	F	2	276	HBsAg	P7
AGTTCC	GCCAAT	14830	14	F	2	276	Norm_bc	P7
ATAGAT	ATCACG	2228	74	B	10	304	HBeAg	P7
ATAGAT	CGATGT	12881	74	B	10	304	HBsAg	P7
ATAGAT	GCCAAT	5174	74	B	10	304	Norm_bc	P7
ATCACG	ATCACG	13306	1	A	1	271	HBeAg	P7
ATCACG	CGATGT	81109	1	A	1	271	HBsAg	P7
ATCACG	GCCAAT	19151	1	A	1	271	Norm_bc	P7
ATGAGC	ATCACG	14065	26	B	4	280	HBeAg	P7
ATGAGC	CGATGT	85592	26	B	4	280	HBsAg	P7
ATGAGC	GCCAAT	19921	26	B	4	280	Norm_bc	P7
ATGGCA	ATCACG	3861	50	B	7	296	HBeAg	P7
ATGGCA	CGATGT	23222	50	B	7	296	HBsAg	P7
ATGGCA	GCCAAT	8064	50	B	7	296	Norm_bc	P7
ATGTCA	ATCACG	5782	15	G	2	277	HBeAg	P7
ATGTCA	CGATGT	33575	15	G	2	277	HBsAg	P7
ATGTCA	GCCAAT	12202	15	G	2	277	Norm_bc	P7
ATTCCT	ATCACG	7822	27	C	4	281	HBeAg	P7
ATTCCT	CGATGT	46392	27	C	4	281	HBsAg	P7
ATTCCT	GCCAAT	15592	27	C	4	281	Norm_bc	P7
CAAAAG	ATCACG	3427	28	D	4	282	HBeAg	P7
CAAAAG	CGATGT	19962	28	D	4	282	HBsAg	P7
CAAAAG	GCCAAT	10393	28	D	4	282	Norm_bc	P7
CAACTA	ATCACG	10429	29	E	4	283	HBeAg	P7
CAACTA	CGATGT	63024	29	E	4	283	HBsAg	P7
CAACTA	GCCAAT	16016	29	E	4	283	Norm_bc	P7
CAAGTT	ATCACG	12665	64	H	8	302	HBeAg	P7
CAAGTT	CGATGT	76506	64	H	8	302	HBsAg	P7
CAAGTT	GCCAAT	17165	64	H	8	302	Norm_bc	P7
CACCGG	ATCACG	1182	30	F	4	284	HBeAg	P7
CACCGG	CGATGT	6970	30	F	4	284	HBsAg	P7
CACCGG	GCCAAT	2094	30	F	4	284	Norm_bc	P7
CACGAT	ATCACG	4232	31	G	4	285	HBeAg	P7
CACGAT	CGATGT	25147	31	G	4	285	HBsAg	P7
CACGAT	GCCAAT	8764	31	G	4	285	Norm_bc	P7
CACTCA	ATCACG	8237	32	H	4	286	HBeAg	P7
CACTCA	CGATGT	47075	32	H	4	286	HBsAg	P7
CACTCA	GCCAAT	14771	32	H	4	286	Norm_bc	P7
CAGATC	ATCACG	13401	7	G	1	277	HBeAg	P7
CAGATC	CGATGT	79674	7	G	1	277	HBsAg	P7
CAGATC	GCCAAT	19430	7	G	1	277	Norm_bc	P7
CAGGCC	ATCACG	1404	81	A	11	311	HBeAg	P7
CAGGCC	CGATGT	8266	81	A	11	311	HBsAg	P7
CAGGCC	GCCAAT	3409	81	A	11	311	Norm_bc	P7
CAGGCG	ATCACG	14973	33	A	5	287	HBeAg	P7
CAGGCG	CGATGT	90263	33	A	5	287	HBsAg	P7
CAGGCG	GCCAAT	19128	33	A	5	287	Norm_bc	P7
CAGTAA	ATCACG	607	82	B	11	312	HBeAg	P7
CAGTAA	CGATGT	3481	82	B	11	312	HBsAg	P7
CAGTAA	GCCAAT	1777	82	B	11	312	Norm_bc	P7
CATGGC	ATCACG	4951	34	B	5	288	HBeAg	P7
CATGGC	CGATGT	28816	34	B	5	288	HBsAg	P7
CATGGC	GCCAAT	10821	34	B	5	288	Norm_bc	P7
CATTTT	ATCACG	1075	35	C	5	289	HBeAg	P7
CATTTT	CGATGT	6632	35	C	5	289	HBsAg	P7
CATTTT	GCCAAT	2125	35	C	5	289	Norm_bc	P7
CCAACA	ATCACG	2306	36	D	5	290	HBeAg	P7
CCAACA	CGATGT	13607	36	D	5	290	HBsAg	P7
CCAACA	GCCAAT	3804	36	D	5	290	Norm_bc	P7
CCGTCC	ATCACG	14516	16	H	2	278	HBeAg	P7
CCGTCC	CGATGT	88395	16	H	2	278	HBsAg	P7
CCGTCC	GCCAAT	18189	16	H	2	278	Norm_bc	P7
CCTATT	ATCACG	611	76	D	10	306	HBeAg	P7
CCTATT	CGATGT	3499	76	D	10	306	HBsAg	P7
CCTATT	GCCAAT	2192	76	D	10	306	Norm_bc	P7
CGATGT	ATCACG	5940	2	B	1	272	HBeAg	P7
CGATGT	CGATGT	34795	2	B	1	272	HBsAg	P7
CGATGT	GCCAAT	9025	2	B	1	272	Norm_bc	P7
CGCCAA	ATCACG	1867	96	H	12	Blank	HBeAg	P7
CGCCAA	CGATGT	10649	96	H	12	Blank	HBsAg	P7
CGCCAA	GCCAAT	5647	96	H	12	Blank	Norm_bc	P7
CGCGGC	ATCACG	13946	59	C	8	297	HBeAg	P7
CGCGGC	CGATGT	81662	59	C	8	297	HBsAg	P7
CGCGGC	GCCAAT	17059	59	C	8	297	Norm_bc	P7
CGGAAT	ATCACG	9655	37	E	5	291	HBeAg	P7
CGGAAT	CGATGT	54989	37	E	5	291	HBsAg	P7
CGGAAT	GCCAAT	21770	37	E	5	291	Norm_bc	P7
CGTACG	ATCACG	7083	22	F	3	284	HBeAg	P7
CGTACG	CGATGT	42724	22	F	3	284	HBsAg	P7
CGTACG	GCCAAT	14180	22	F	3	284	Norm_bc	P7
CGTTAG	ATCACG	3602	89	A	12	311	HBeAg	P7
CGTTAG	CGATGT	21093	89	A	12	311	HBsAg	P7
CGTTAG	GCCAAT	8591	89	A	12	311	Norm_bc	P7
CTAAGG	ATCACG	2507	85	E	11	315	HBeAg	P7
CTAAGG	CGATGT	14785	85	E	11	315	HBsAg	P7
CTAAGG	GCCAAT	7403	85	E	11	315	Norm_bc	P7
CTAGCT	ATCACG	11582	38	F	5	292	HBeAg	P7
CTAGCT	CGATGT	70582	38	F	5	292	HBsAg	P7
CTAGCT	GCCAAT	19463	38	F	5	292	Norm_bc	P7
CTATAC	ATCACG	1950	39	G	5	293	HBeAg	P7
CTATAC	CGATGT	11108	39	G	5	293	HBsAg	P7
CTATAC	GCCAAT	2736	39	G	5	293	Norm_bc	P7
CTATCT	ATCACG	10999	52	D	7	298	HBeAg	P7
CTATCT	CGATGT	65857	52	D	7	298	HBsAg	P7
CTATCT	GCCAAT	12596	52	D	7	298	Norm_bc	P7
CTCAGA	ATCACG	3675	40	H	5	294	HBeAg	P7
CTCAGA	CGATGT	21522	40	H	5	294	HBsAg	P7
CTCAGA	GCCAAT	7479	40	H	5	294	Norm_bc	P7
CTGCAT	ATCACG	14041	80	H	10	310	HBeAg	P7
CTGCAT	CGATGT	84730	80	H	10	310	HBsAg	P7
CTGCAT	GCCAAT	21191	80	H	10	310	Norm_bc	P7
CTTGTA	ATCACG	4330	12	D	2	274	HBeAg	P7
CTTGTA	CGATGT	24735	12	D	2	274	HBsAg	P7
CTTGTA	GCCAAT	6887	12	D	2	274	Norm_bc	P7
GAATGC	ATCACG	1859	91	C	12	313	HBeAg	P7
GAATGC	CGATGT	10692	91	C	12	313	HBsAg	P7
GAATGC	GCCAAT	6113	91	C	12	313	Norm_bc	P7
GACGAC	ATCACG	5570	41	A	6	287	HBeAg	P7
GACGAC	CGATGT	32770	41	A	6	287	HBsAg	P7
GACGAC	GCCAAT	9085	41	A	6	287	Norm_bc	P7
GACGAT	ATCACG	6802	62	F	8	300	HBeAg	P7
GACGAT	CGATGT	39346	62	F	8	300	HBsAg	P7
GACGAT	GCCAAT	17757	62	F	8	300	Norm_bc	P7
GAGCGC	ATCACG	2422	66	B	9	304	HBeAg	P7
GAGCGC	CGATGT	14264	66	B	9	304	HBsAg	P7
GAGCGC	GCCAAT	4309	66	B	9	304	Norm_bc	P7
GAGTCT	ATCACG	1788	69	E	9	307	HBeAg	P7
GAGTCT	CGATGT	10484	69	E	9	307	HBsAg	P7
GAGTCT	GCCAAT	3095	69	E	9	307	Norm_bc	P7
GAGTGG	ATCACG	13751	23	G	3	285	HBeAg	P7
GAGTGG	CGATGT	79636	23	G	3	285	HBsAg	P7
GAGTGG	GCCAAT	22009	23	G	3	285	Norm_bc	P7
GATCAG	ATCACG	4609	9	A	2	271	HBeAg	P7
GATCAG	CGATGT	27809	9	A	2	271	HBsAg	P7
GATCAG	GCCAAT	7534	9	A	2	271	Norm_bc	P7
GCCAAT	ATCACG	7980	6	F	1	276	HBeAg	P7
GCCAAT	CGATGT	47351	6	F	1	276	HBsAg	P7
GCCAAT	GCCAAT	14073	6	F	1	276	Norm_bc	P7
GGAGAA	ATCACG	6203	73	A	10	303	HBeAg	P7
GGAGAA	CGATGT	35838	73	A	10	303	HBsAg	P7
GGAGAA	GCCAAT	12964	73	A	10	303	Norm_bc	P7
GGCTAC	ATCACG	3804	11	C	2	273	HBeAg	P7
GGCTAC	CGATGT	22604	11	C	2	273	HBsAg	P7
GGCTAC	GCCAAT	5991	11	C	2	273	Norm_bc	P7
GGTAGC	ATCACG	16153	24	H	3	286	HBeAg	P7
GGTAGC	CGATGT	95587	24	H	3	286	HBsAg	P7
GGTAGC	GCCAAT	21245	24	H	3	286	Norm_bc	P7
GTACTT	ATCACG	14054	49	A	7	295	HBeAg	P7
GTACTT	CGATGT	84365	49	A	7	295	HBsAg	P7
GTACTT	GCCAAT	18702	49	A	7	295	Norm_bc	P7
GTAGAG	ATCACG	18201	17	A	3	279	HBeAg	P7
GTAGAG	CGATGT	107931	17	A	3	279	HBsAg	P7
GTAGAG	GCCAAT	21066	17	A	3	279	Norm_bc	P7
GTCCGC	ATCACG	15104	18	B	3	280	HBeAg	P7
GTCCGC	CGATGT	90129	18	B	3	280	HBsAg	P7
GTCCGC	GCCAAT	19637	18	B	3	280	Norm_bc	P7
GTGAAA	ATCACG	14372	19	C	3	281	HBeAg	P7
GTGAAA	CGATGT	84750	19	C	3	281	HBsAg	P7
GTGAAA	GCCAAT	16852	19	C	3	281	Norm_bc	P7
GTGAGA	ATCACG	5205	87	G	11	Negative	HBeAg	P7
GTGAGA	CGATGT	29667	87	G	11	Negative	HBsAg	P7
GTGAGA	GCCAAT	15507	87	G	11	Negative	Norm_bc	P7
GTGGCC	ATCACG	4533	20	D	3	282	HBeAg	P7
GTGGCC	CGATGT	26902	20	D	3	282	HBsAg	P7
GTGGCC	GCCAAT	7406	20	D	3	282	Norm_bc	P7
GTGTAT	ATCACG	1534	90	B	12	312	HBeAg	P7
GTGTAT	CGATGT	8500	90	B	12	312	HBsAg	P7
GTGTAT	GCCAAT	4239	90	B	12	312	Norm_bc	P7
GTTACC	ATCACG	1096	83	C	11	313	HBeAg	P7
GTTACC	CGATGT	6219	83	C	11	313	HBsAg	P7
GTTACC	GCCAAT	3058	83	C	11	313	Norm_bc	P7
GTTTCG	ATCACG	2029	21	E	3	283	HBeAg	P7
GTTTCG	CGATGT	11728	21	E	3	283	HBsAg	P7
GTTTCG	GCCAAT	3616	21	E	3	283	Norm_bc	P7
TAACCG	ATCACG	1436	77	E	10	307	HBeAg	P7
TAACCG	CGATGT	8467	77	E	10	307	HBsAg	P7
TAACCG	GCCAAT	3583	77	E	10	307	Norm_bc	P7
TAAGAC	ATCACG	13590	88	H	11	Blank	HBeAg	P7
TAAGAC	CGATGT	80532	88	H	11	Blank	HBsAg	P7
TAAGAC	GCCAAT	23183	88	H	11	Blank	Norm_bc	P7
TAATCG	ATCACG	3597	42	B	6	288	HBeAg	P7
TAATCG	CGATGT	21781	42	B	6	288	HBsAg	P7
TAATCG	GCCAAT	5565	42	B	6	288	Norm_bc	P7
TACAGC	ATCACG	1806	43	C	6	289	HBeAg	P7
TACAGC	CGATGT	10309	43	C	6	289	HBsAg	P7
TACAGC	GCCAAT	2529	43	C	6	289	Norm_bc	P7
TACCTT	ATCACG	3056	65	A	9	303	HBeAg	P7
TACCTT	CGATGT	17764	65	A	9	303	HBsAg	P7
TACCTT	GCCAAT	6303	65	A	9	303	Norm_bc	P7
TAGCTT	ATCACG	6850	10	B	2	272	HBeAg	P7
TAGCTT	CGATGT	40068	10	B	2	272	HBsAg	P7
TAGCTT	GCCAAT	11459	10	B	2	272	Norm_bc	P7
TATAAT	ATCACG	2375	44	D	6	290	HBeAg	P7
TATAAT	CGATGT	13982	44	D	6	290	HBsAg	P7
TATAAT	GCCAAT	3992	44	D	6	290	Norm_bc	P7
TATATC	ATCACG	10428	53	E	7	299	HBeAg	P7
TATATC	CGATGT	62552	53	E	7	299	HBsAg	P7
TATATC	GCCAAT	15178	53	E	7	299	Norm_bc	P7
TATGCA	ATCACG	1252	75	C	10	305	HBeAg	P7
TATGCA	CGATGT	6995	75	C	10	305	HBsAg	P7
TATGCA	GCCAAT	3785	75	C	10	305	Norm_bc	P7
TATTAT	ATCACG	11430	54	F	7	300	HBeAg	P7
TATTAT	CGATGT	68917	54	F	7	300	HBsAg	P7
TATTAT	GCCAAT	18278	54	F	7	300	Norm_bc	P7
TCATTC	ATCACG	7785	45	E	6	291	HBeAg	P7
TCATTC	CGATGT	45846	45	E	6	291	HBsAg	P7
TCATTC	GCCAAT	16966	45	E	6	291	Norm_bc	P7
TCCACA	ATCACG	14036	56	H	7	302	HBeAg	P7
TCCACA	CGATGT	84820	56	H	7	302	HBsAg	P7
TCCACA	GCCAAT	18804	56	H	7	302	Norm_bc	P7
TCCCGA	ATCACG	3422	46	F	6	292	HBeAg	P7
TCCCGA	CGATGT	20226	46	F	6	292	HBsAg	P7
TCCCGA	GCCAAT	6898	46	F	6	292	Norm_bc	P7
TCCTGC	ATCACG	13839	58	B	8	296	HBeAg	P7
TCCTGC	CGATGT	82830	58	B	8	296	HBsAg	P7
TCCTGC	GCCAAT	17436	58	B	8	296	Norm_bc	P7
TCGAAG	ATCACG	15637	47	G	6	293	HBeAg	P7
TCGAAG	CGATGT	93749	47	G	6	293	HBsAg	P7
TCGAAG	GCCAAT	22164	47	G	6	293	Norm_bc	P7
TCGGCA	ATCACG	4111	48	H	6	294	HBeAg	P7
TCGGCA	CGATGT	25168	48	H	6	294	HBsAg	P7
TCGGCA	GCCAAT	7565	48	H	6	294	Norm_bc	P7
TGACCA	ATCACG	5975	4	D	1	274	HBeAg	P7
TGACCA	CGATGT	34621	4	D	1	274	HBsAg	P7
TGACCA	GCCAAT	10469	4	D	1	274	Norm_bc	P7
TGCGCT	ATCACG	17457	60	D	8	298	HBeAg	P7
TGCGCT	CGATGT	103866	60	D	8	298	HBsAg	P7
TGCGCT	GCCAAT	21530	60	D	8	298	Norm_bc	P7
TGGAGC	ATCACG	10994	79	G	10	309	HBeAg	P7
TGGAGC	CGATGT	67630	79	G	10	309	HBsAg	P7
TGGAGC	GCCAAT	21352	79	G	10	309	Norm_bc	P7
TTAGGC	ATCACG	7175	3	C	1	273	HBeAg	P7
TTAGGC	CGATGT	41437	3	C	1	273	HBsAg	P7
TTAGGC	GCCAAT	11701	3	C	1	273	Norm_bc	P7
TTCTCG	ATCACG	3478	57	A	8	295	HBeAg	P7
TTCTCG	CGATGT	20438	57	A	8	295	HBsAg	P7
TTCTCG	GCCAAT	6480	57	A	8	295	Norm_bc	P7
TTGCGG	ATCACG	16755	63	G	8	301	HBeAg	P7
TTGCGG	CGATGT	98377	63	G	8	301	HBsAg	P7
TTGCGG	GCCAAT	22837	63	G	8	301	Norm_bc	P7
AACGGA	ATCACG	9420	61	E	8	344	HBeAg	P8
AACGGA	CGATGT	55462	61	E	8	344	HBsAg	P8
AACGGA	GCCAAT	18654	61	E	8	344	Norm_bc	P8
AAGGAG	ATCACG	23080	51	C	7	342	HBeAg	P8
AAGGAG	CGATGT	137914	51	C	7	342	HBsAg	P8
AAGGAG	GCCAAT	29358	51	C	7	342	Norm_bc	P8
AATCGT	ATCACG	24596	68	D	9	351	HBeAg	P8
AATCGT	CGATGT	147549	68	D	9	351	HBsAg	P8
AATCGT	GCCAAT	38341	68	D	9	351	Norm_bc	P8
AATTCC	ATCACG	1853	71	G	9	354	HBeAg	P8
AATTCC	CGATGT	11398	71	G	9	354	HBsAg	P8
AATTCC	GCCAAT	4272	71	G	9	354	Norm_bc	P8
ACAGTG	ATCACG	8658	5	E	1	320	HBeAg	P8
ACAGTG	CGATGT	51453	5	E	1	320	HBsAg	P8
ACAGTG	GCCAAT	13925	5	E	1	320	Norm_bc	P8
ACCTTA	ATCACG	4412	95	G	12	Negative	HBeAg	P8
ACCTTA	CGATGT	24641	95	G	12	Negative	HBsAg	P8
ACCTTA	GCCAAT	14241	95	G	12	Negative	Norm_bc	P8
ACGAGG	ATCACG	1978	67	C	9	350	HBeAg	P8
ACGAGG	CGATGT	11293	67	C	9	350	HBsAg	P8
ACGAGG	GCCAAT	3364	67	C	9	350	Norm_bc	P8
ACTGAT	ATCACG	23208	25	A	4	324	HBeAg	P8
ACTGAT	CGATGT	139171	25	A	4	324	HBsAg	P8
ACTGAT	GCCAAT	29172	25	A	4	324	Norm_bc	P8
[truncated: 1,806 more rows]
