# Supplementary figures and images for: Modular DNA barcoding of nanobodies enables multiplexed in situ protein imaging and high-throughput biomolecule detection
Source: eLife journal article supplement (doi:10.7554/elife.105225), 2025-05-14

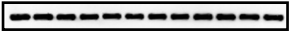

Supplement: fig3-data2 [file elife-105225-fig3-data2-v1.zip]

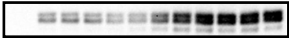

Supplement: fig3-data2 [file elife-105225-fig3-data2-v1.zip]

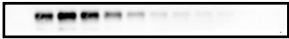

Supplement: fig3-data2 [file elife-105225-fig3-data2-v1.zip]

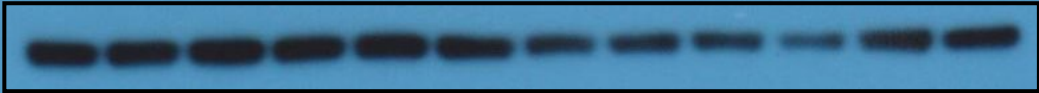

Supplement: fig3-figsupp1-data2 [file Figure 3–Figure Supplement 1_Source Data 2_2_tubulin.pdf › Figure 3–Figure Supplement 1_Source Data 2_2_tubulin.pdf]

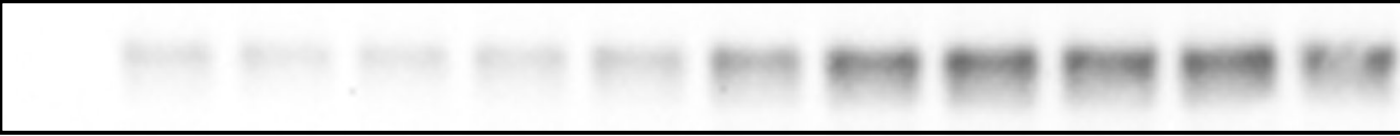

Supplement: fig3-figsupp1-data2 [file Figure 3–Figure Supplement 1_Source Data 2_3_mCherry.pdf › Figure 3–Figure Supplement 1_Source Data 2_3_mCherry.pdf]

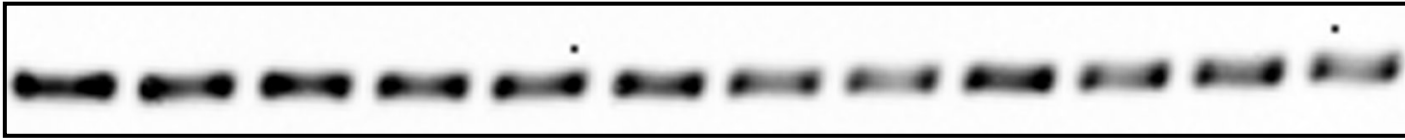

Supplement: fig3-figsupp1-data2 [file Figure 3–Figure Supplement 1_Source Data 2_4_tubulin.pdf › Figure 3–Figure Supplement 1_Source Data 2_4_tubulin.pdf]

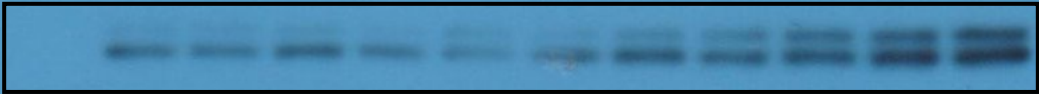

Supplement: fig3-figsupp1-data2 [file Figure 3–Figure Supplement 1_Source Data 2_GFP.pdf › Figure 3–Figure Supplement 1_Source Data 2_GFP.pdf]
